# Supplementary material for: Epigenetic modifications regulate cultivar-specific root development and metabolic adaptation to nitrogen availability in wheat
Source: Research Square preprint supplement (doi:10.21203/rs.3.rs-2801336/v1), 2023-04-20
Supplement: Supplementary file 1 [file 0c0b1033be1cc5cd7c2c82b8.pdf]

## Reporting Summary

Nature Portfolio wishes to improve the reproducibility of the work that we publish. This form provides structure for consistency and transparency in reporting. For further information on Nature Portfolio policies, see our [Editorial Policies](#) and the [Editorial Policy Checklist](#).

### Statistics

For all statistical analyses, confirm that the following items are present in the figure legend, table legend, main text, or Methods section.

n/a Confirmed

- The exact sample size ( $n$ ) for each experimental group/condition, given as a discrete number and unit of measurement
- A statement on whether measurements were taken from distinct samples or whether the same sample was measured repeatedly
- The statistical test(s) used AND whether they are one- or two-sided  
*Only common tests should be described solely by name; describe more complex techniques in the Methods section.*
- A description of all covariates tested
- A description of any assumptions or corrections, such as tests of normality and adjustment for multiple comparisons
- A full description of the statistical parameters including central tendency (e.g. means) or other basic estimates (e.g. regression coefficient) AND variation (e.g. standard deviation) or associated estimates of uncertainty (e.g. confidence intervals)
- For null hypothesis testing, the test statistic (e.g.  $F$ ,  $t$ ,  $r$ ) with confidence intervals, effect sizes, degrees of freedom and  $P$  value noted  
*Give  $P$  values as exact values whenever suitable.*
- For Bayesian analysis, information on the choice of priors and Markov chain Monte Carlo settings
- For hierarchical and complex designs, identification of the appropriate level for tests and full reporting of outcomes
- Estimates of effect sizes (e.g. Cohen's  $d$ , Pearson's  $r$ ), indicating how they were calculated

*Our web collection on [statistics for biologists](#) contains articles on many of the points above.*

### Software and code

Policy information about [availability of computer code](#)

**Data collection** CUT&Tag were performed using the Illumina NovaSeq 6000 platform. Luciferase activities were measured by GLOMAX 20/20. Root architecture was scanned by ScanMaker i8000 plus. Luciferase images were taken by Tanon Imaging System. 15N-content was detected using an isotope ratio mass spectrometer (Isoprime 100)

**Data analysis** Code used in this study was deposited in the GitHub (<https://github.com/ZhangHao-995/NJE-pipeline>). Raw reads were cleaned by fastp (v0.20.1) with "--detect\_adapter\_for\_pe" parameter. Clean reads of RNA-seq libraries were aligned to wheat reference genome (IWGSC RefSeq v1.1) using hisat2 (v2.1.0). Clean reads of CUT&Tag libraries were aligned to wheat reference genome (IWGSC RefSeq v1.1) using bwa mem algorithm (v 0.7.17) with "-M" parameter. Aligned reads of CUT&Tag were filtered by samtools (v1.5) with "-F 1,804 -f 2 -q 30" parameter and deduplicated by Picard (v 2.20.5-0). The peak calling was done by macs2 (v 2.1.4). For narrow peaks (H3K27ac, H3K4me3, and H2A.Z) and broad peaks (H3K27me3, H3K36me3, and H3K9me3), parameters "--p 1e-3 --keep-dup all -g 14600000000" and "--keep-dup all -g 14600000000 --broad --broad-cutoff 0.05" were used. Peak was annotated to the wheat genome using the ChIPseeker (v1.30.3). featureCounts (v2.0.1) was used to count the number of paired mapping reads that overlap each annotated gene (IWGSC Annotation v1.1) with the parameter "-p -P -B -C". deepTools (v3.3.0) was used to convert bam files into bigwig files and visualization for epigenomic data. IGV (v2.8.0.01) was used to visualize the track of epigenomic data. MANorm (v1.3.0) was used for the quantitative comparison of CUT&Tag signals between samples with the following criteria: |M value| > 1 and P < 0.05. Fimo (v4.11.2) was used to scan motifs. GO annotation files were generated from IWGSC Annotation v1.1 and clusterProfiler (v4.2.2) was used for enrichment analysis. chromHMM (v1.21) was used. "BinarizeBam" and "LearnModel" commands with default parameters were used for chromatin-state (CS) annotation. R (<https://cran.r-project.org/>; version 4.2.1) was used to compute statistics

For manuscripts utilizing custom algorithms or software that are central to the research but not yet described in published literature, software must be made available to editors and reviewers. We strongly encourage code deposition in a community repository (e.g. GitHub). See the Nature Portfolio [guidelines for submitting code & software](#) for further information.

## Data

Policy information about [availability of data](#)

All manuscripts must include a [data availability statement](#). This statement should provide the following information, where applicable:

- Accession codes, unique identifiers, or web links for publicly available datasets
- A description of any restrictions on data availability
- For clinical datasets or third party data, please ensure that the statement adheres to our [policy](#)

The raw sequence data reported in this paper have been deposited in the Genome Sequence Archive in National Genomics Data Center, China National Center for Bioinformatics / Beijing Institute of Genomics, Chinese Academy of Sciences (GSA: CRA009936) that are publicly accessible at <https://ngdc.cncb.ac.cn/gsa>. the transcriptome used was under BioProject accession numbers PRJCA004416; Hi-C data of wheat root was download from Gene Expression Omnibus (GEO) under accession number GSM3929164. All motif dataused in this study are downloaded from the JASPAR database (<https://jaspar2020.genereg.net/>)

## Research involving human participants, their data, or biological material

Policy information about studies with [human participants or human data](#). See also policy information about [sex, gender \(identity/presentation\), and sexual orientation](#) and [race, ethnicity and racism](#).

|                                                                    |                |
|--------------------------------------------------------------------|----------------|
| Reporting on sex and gender                                        | not applicable |
| Reporting on race, ethnicity, or other socially relevant groupings | not applicable |
| Population characteristics                                         | not applicable |
| Recruitment                                                        | not applicable |
| Ethics oversight                                                   | not applicable |

Note that full information on the approval of the study protocol must also be provided in the manuscript.

## Field-specific reporting

Please select the one below that is the best fit for your research. If you are not sure, read the appropriate sections before making your selection.

Life sciences  Behavioural & social sciences  Ecological, evolutionary & environmental sciences

For a reference copy of the document with all sections, see [nature.com/documents/nr-reporting-summary-flat.pdf](https://www.nature.com/documents/nr-reporting-summary-flat.pdf)

## Life sciences study design

All studies must disclose on these points even when the disclosure is negative.

|                 |                                                                                                                                                                                                                                      |
|-----------------|--------------------------------------------------------------------------------------------------------------------------------------------------------------------------------------------------------------------------------------|
| Sample size     | The sample size and the results of statistical analyses are described in the relevant figures or method section. Sample size was determined based on experimental trials to allow for confident statistical analyses.                |
| Data exclusions | No data that pass quality control were exclusion from analysis.                                                                                                                                                                      |
| Replication     | CUT&Tag have two biological replications. Other experiments involving measurements and quantifications were repeated at least two times using biological materials produced independently. All replication attempts were successful. |
| Randomization   | Plants were grown side by side to minimize unexpected environmental variations during growth and experimentation.                                                                                                                    |
| Blinding        | Blinding was not applied due to lack of prior knowledge and expectation of the final results.                                                                                                                                        |

## Reporting for specific materials, systems and methods

We require information from authors about some types of materials, experimental systems and methods used in many studies. Here, indicate whether each material, system or method listed is relevant to your study. If you are not sure if a list item applies to your research, read the appropriate section before selecting a response.

## Materials &amp; experimental systems

| n/a                                 | Involvement                                            |
|-------------------------------------|--------------------------------------------------------|
| <input type="checkbox"/>            | <input checked="" type="checkbox"/> Antibodies         |
| <input checked="" type="checkbox"/> | <input type="checkbox"/> Eukaryotic cell lines         |
| <input checked="" type="checkbox"/> | <input type="checkbox"/> Palaeontology and archaeology |
| <input checked="" type="checkbox"/> | <input type="checkbox"/> Animals and other organisms   |
| <input checked="" type="checkbox"/> | <input type="checkbox"/> Clinical data                 |
| <input checked="" type="checkbox"/> | <input type="checkbox"/> Dual use research of concern  |
| <input type="checkbox"/>            | <input checked="" type="checkbox"/> Plants             |

## Methods

| n/a                                 | Involvement                                     |
|-------------------------------------|-------------------------------------------------|
| <input checked="" type="checkbox"/> | <input type="checkbox"/> ChIP-seq               |
| <input checked="" type="checkbox"/> | <input type="checkbox"/> Flow cytometry         |
| <input checked="" type="checkbox"/> | <input type="checkbox"/> MRI-based neuroimaging |

## Antibodies

## Antibodies used

Anti-H3K27ac antibody (Abcam, Cat#ab4729), Anti-H3K27me3 antibody (CST, Cat#C36B11), Anti-H3K4me3 antibody (Abcam, Cat#ab8580), Anti-H3K9me3 antibody (Abcam, Cat#ab8898), Anti-H3K36me3 antibody (Abcam, Cat#ab9050), Anti-H2A.Z antibody (Gift from Prof. Roger Deal lab, the same as "https://doi.org/10.1371/journal.pgen.1008326")

## Validation

All primary antibodies are commercially available. All validation statements can be found on the manufacturers' websites (Antibodies-Online: <https://www.antibodies-online.com/antibody>; Abcam, <https://www.abcam.com/nav/primary-antibodies>) The following validation have been extracted from the manufacturer's webpage. The anti-H3K27ac antibody specifically recognizes the Histone H3-acetyl K27 modification and is expected to demonstrate broad species cross-reactivity due to high sequence conservation. The anti-H3K27me3 antibody specifically recognizes the Histone H3-tri methyl K27 modification and is expected to demonstrate broad species cross-reactivity due to high sequence conservation. The anti-H3K4me3 antibody specifically recognizes the Histone H3 tri methyl-K4 modification and is expected to demonstrate broad species cross-reactivity due to high sequence conservation. The anti-H3K9me3 antibody specifically recognizes the Histone H3 tri methyl-K4 modification and is expected to demonstrate broad species cross-reactivity due to high sequence conservation. The anti-H3K36me3 antibody specifically recognizes the Histone H3 tri methyl-K4 modification and is expected to demonstrate broad species cross-reactivity due to high sequence conservation. Additionally, these antibody were validated in wheat in a previous study: Zhao, L., Yang, Y., Chen, J. et al. Dynamic chromatin regulatory programs during embryogenesis of hexaploid wheat. *Genome Biol* 24, 7 (2023).

## Dual use research of concern

Policy information about [dual use research of concern](#)

## Hazards

Could the accidental, deliberate or reckless misuse of agents or technologies generated in the work, or the application of information presented in the manuscript, pose a threat to:

| No                                  | Yes                                                 |
|-------------------------------------|-----------------------------------------------------|
| <input checked="" type="checkbox"/> | <input type="checkbox"/> Public health              |
| <input checked="" type="checkbox"/> | <input type="checkbox"/> National security          |
| <input checked="" type="checkbox"/> | <input type="checkbox"/> Crops and/or livestock     |
| <input checked="" type="checkbox"/> | <input type="checkbox"/> Ecosystems                 |
| <input checked="" type="checkbox"/> | <input type="checkbox"/> Any other significant area |

## Experiments of concern

Does the work involve any of these experiments of concern:

| No                                  | Yes                                                                                                  |
|-------------------------------------|------------------------------------------------------------------------------------------------------|
| <input checked="" type="checkbox"/> | <input type="checkbox"/> Demonstrate how to render a vaccine ineffective                             |
| <input checked="" type="checkbox"/> | <input type="checkbox"/> Confer resistance to therapeutically useful antibiotics or antiviral agents |
| <input checked="" type="checkbox"/> | <input type="checkbox"/> Enhance the virulence of a pathogen or render a nonpathogen virulent        |
| <input checked="" type="checkbox"/> | <input type="checkbox"/> Increase transmissibility of a pathogen                                     |
| <input checked="" type="checkbox"/> | <input type="checkbox"/> Alter the host range of a pathogen                                          |
| <input checked="" type="checkbox"/> | <input type="checkbox"/> Enable evasion of diagnostic/detection modalities                           |
| <input checked="" type="checkbox"/> | <input type="checkbox"/> Enable the weaponization of a biological agent or toxin                     |
| <input checked="" type="checkbox"/> | <input type="checkbox"/> Any other potentially harmful combination of experiments and agents         |
