# Supplementary material for: Epigenetic modifications regulate cultivar-specific root development and metabolic adaptation to nitrogen availability in wheat
Source: Research Square preprint supplement (doi:10.21203/rs.3.rs-2801336/v1), 2023-04-20
Supplement: Supplementary file 1 [file 29d1171d8dd12b42bc3732e4.xlsx]

## Sheet: Sheet1
Primer used in this study
Primer usage	Primer Name	Sequence(5`-3`)
TaSWN-crgenotyping	SWN-Check-F	TCCTCGTCCAAGGCCTCCGAC
TaSWN-crgenotyping	SWN-Check-A-R	AATTCTGTAGATGCGGTCGGTGCTC
TaSWN-crgenotyping	SWN-Check-B-R	AGGTCAAAACAGGACACAGGCACAC
TaSWN-crgenotyping	SWN-Check-D-R	TGCCAAAACACCACACAGGGCTC
Luciferase reporter construction	XR-F	GGCCGGTGGCCTGTAACT
Luciferase reporter construction	XR-R	AGCTACTGGAGTACCCTATAACTAGCG
Luciferase reporter construction	HR-F	GATGATGATGATCGGTAAAACTTG
Luciferase reporter construction	HR-R	CCTTAATAATTAGTCAATGCTCCT
Protein interaction test	TaERF9_5B-F	ATGGCCATGGCCACTGCG
Protein interaction test	TaERF9_5B-R	TATGCTGGACTCGAAAATGGC
Protein interaction test	TaERF9_5D-F	ATGGCCACTGCGAACCAA
Protein interaction test	TaERF9_5D-R	TTATGCTGGACTCGAAAATG
Protein interaction test	TaBPC_4A-F	ATGGACGACGACGGCA
Protein interaction test	TaBPC_4A-R	TTACCTGATTGTTACAAACTTG
Protein interaction test	TaEMF2-2A.2-F	ATGTCAGGTCTGATGTCCTT
Protein interaction test	TaEMF2-2A.2-R	TCAAGATTGCTTGGGGTCCG
Protein interaction test	TaSWN-F	ATGGCGTCGTCCTCGTCCAA
Protein interaction test	TaSWN-R	AGAAGCATAATCATGTTTGC
