# Supplementary material for: Epigenetic modifications regulate cultivar-specific root development and metabolic adaptation to nitrogen availability in wheat
Source: Research Square preprint supplement (doi:10.21203/rs.3.rs-2801336/v1), 2023-04-20
Supplement: Supplementary file 2 [file 3ed53562cd891cec68ff3a94.xlsx]

## Sheet: TableS2A
Assignment of distal Cultivar-specific H3K27ac regions
Category of Cultivar-specific H3K27ac regions	Cultivar-specific distal regulator (H3K27ac peaks)	Target gene	Cor	Cor_test
KN9204-Specific	chr1A:4857-5001	TraesCS1A02G000400	0.584568	0.0459108
KN9204-Specific	chr1A:4857-5001	TraesCS1A02G000900	0.726723	0.00742187
KN9204-Specific	chr1A:4857-5001	TraesCS1A02G001100	0.66764	0.0176729
KN9204-Specific	chr1A:4857-5001	TraesCS1A02G001400	0.643514	0.0239574
KN9204-Specific	chr1A:4857-5001	TraesCS1A02G001600	0.599696	0.0392886
KN9204-Specific	chr1A:22225-22556	TraesCS1A02G000400	0.659095	0.0197405
KN9204-Specific	chr1A:22225-22556	TraesCS1A02G000900	0.834756	0.000730066
KN9204-Specific	chr1A:22225-22556	TraesCS1A02G001100	0.797476	0.00188853
KN9204-Specific	chr1A:22225-22556	TraesCS1A02G001400	0.733563	0.0066219
KN9204-Specific	chr1A:22225-22556	TraesCS1A02G001600	0.589524	0.0436603
KN9204-Specific	chr1A:27655-27876	TraesCS1A02G000400	0.663259	0.0187121
KN9204-Specific	chr1A:27655-27876	TraesCS1A02G000900	0.885012	0.00013014
KN9204-Specific	chr1A:27655-27876	TraesCS1A02G001100	0.822276	0.00102755
KN9204-Specific	chr1A:27655-27876	TraesCS1A02G001400	0.727483	0.00732953
KN9204-Specific	chr1A:28267-28534	TraesCS1A02G000400	0.621569	0.0309572
KN9204-Specific	chr1A:28267-28534	TraesCS1A02G000900	0.760954	0.0040487
KN9204-Specific	chr1A:28267-28534	TraesCS1A02G001100	0.822354	0.00102544
KN9204-Specific	chr1A:28267-28534	TraesCS1A02G001200	0.624622	0.0299049
KN9204-Specific	chr1A:28267-28534	TraesCS1A02G001400	0.663323	0.0186966
KN9204-Specific	chr1A:28267-28534	TraesCS1A02G001600	0.795243	0.00198695
KN9204-Specific	chr1A:34572-34713	TraesCS1A02G000900	0.685511	0.0138678
KN9204-Specific	chr1A:34572-34713	TraesCS1A02G001100	0.640449	0.0248585
KN9204-Specific	chr1A:36434-36676	TraesCS1A02G000200	0.702884	0.0107847
KN9204-Specific	chr1A:36434-36676	TraesCS1A02G000300	0.645166	0.0234821
KN9204-Specific	chr1A:36434-36676	TraesCS1A02G000400	0.729552	0.00708263
KN9204-Specific	chr1A:36434-36676	TraesCS1A02G000700	0.661174	0.0192221
KN9204-Specific	chr1A:36434-36676	TraesCS1A02G000900	0.835614	0.000712394
KN9204-Specific	chr1A:36434-36676	TraesCS1A02G001100	0.700016	0.0112546
KN9204-Specific	chr1A:36434-36676	TraesCS1A02G001400	0.65566	0.0206195
KN9204-Specific	chr1A:36434-36676	TraesCS1A02G001700	0.590834	0.0430792
KN9204-Specific	chr1A:91124-91389	TraesCS1A02G000200	0.604409	0.0373725
KN9204-Specific	chr1A:91124-91389	TraesCS1A02G000400	0.697268	0.011719
KN9204-Specific	chr1A:91124-91389	TraesCS1A02G000900	0.819463	0.00110594
KN9204-Specific	chr1A:91124-91389	TraesCS1A02G001100	0.7642	0.00380371
KN9204-Specific	chr1A:91124-91389	TraesCS1A02G001400	0.720224	0.00824711
KN9204-Specific	chr1A:125399-125713	TraesCS1A02G000200	0.585177	0.0456297
KN9204-Specific	chr1A:125399-125713	TraesCS1A02G000300	0.631776	0.0275402
KN9204-Specific	chr1A:125399-125713	TraesCS1A02G000400	0.701088	0.0110772
KN9204-Specific	chr1A:125399-125713	TraesCS1A02G000900	0.8863	0.00012329
KN9204-Specific	chr1A:125399-125713	TraesCS1A02G001100	0.77539	0.0030444
KN9204-Specific	chr1A:125399-125713	TraesCS1A02G001400	0.709938	0.00969096
KN9204-Specific	chr1A:127934-128388	TraesCS1A02G000200	0.627831	0.0288269
KN9204-Specific	chr1A:127934-128388	TraesCS1A02G000300	0.688423	0.0133105
KN9204-Specific	chr1A:127934-128388	TraesCS1A02G000400	0.757302	0.00433848
KN9204-Specific	chr1A:127934-128388	TraesCS1A02G000900	0.929402	1.22574e-05
KN9204-Specific	chr1A:127934-128388	TraesCS1A02G001100	0.851924	0.000434873
KN9204-Specific	chr1A:127934-128388	TraesCS1A02G001200	0.638464	0.0254546
KN9204-Specific	chr1A:127934-128388	TraesCS1A02G001300	0.597004	0.0404139
KN9204-Specific	chr1A:127934-128388	TraesCS1A02G001400	0.685961	0.0137805
KN9204-Specific	chr1A:127934-128388	TraesCS1A02G001500	0.679017	0.0151724
KN9204-Specific	chr1A:131771-132028	TraesCS1A02G000900	0.711397	0.0094755
KN9204-Specific	chr1A:131771-132028	TraesCS1A02G001100	0.626051	0.0294212
KN9204-Specific	chr1A:131771-132028	TraesCS1A02G001400	0.602863	0.0379935
KN9204-Specific	chr1A:145759-145926	TraesCS1A02G000300	0.577696	0.0491643
KN9204-Specific	chr1A:145759-145926	TraesCS1A02G000400	0.603787	0.0376214
KN9204-Specific	chr1A:145759-145926	TraesCS1A02G000900	0.800159	0.00177527
KN9204-Specific	chr1A:145759-145926	TraesCS1A02G001100	0.741404	0.00578642
KN9204-Specific	chr1A:145759-145926	TraesCS1A02G001400	0.636175	0.0261552
KN9204-Specific	chr1A:145759-145926	TraesCS1A02G001600	0.615655	0.0330707
KN9204-Specific	chr1A:176680-176963	TraesCS1A02G000900	0.64407	0.0237967
KN9204-Specific	chr1A:176680-176963	TraesCS1A02G001100	0.615928	0.0329712
KN9204-Specific	chr1A:176680-176963	TraesCS1A02G001400	0.625655	0.0295546
KN9204-Specific	chr1A:176680-176963	TraesCS1A02G001600	0.65553	0.0206534
KN9204-Specific	chr1A:189728-189989	TraesCS1A02G000400	0.636327	0.0261081
KN9204-Specific	chr1A:189728-189989	TraesCS1A02G000900	0.8274	0.000895896
KN9204-Specific	chr1A:189728-189989	TraesCS1A02G001100	0.776151	0.00299735
KN9204-Specific	chr1A:189728-189989	TraesCS1A02G001400	0.731144	0.00689696
KN9204-Specific	chr1A:256834-257158	TraesCS1A02G000900	0.692237	0.0126058
KN9204-Specific	chr1A:256834-257158	TraesCS1A02G001100	0.73565	0.00639119
KN9204-Specific	chr1A:256834-257158	TraesCS1A02G001400	0.661418	0.0191619
KN9204-Specific	chr1A:256834-257158	TraesCS1A02G001600	0.717806	0.008571
KN9204-Specific	chr1A:262215-262498	TraesCS1A02G000400	0.629443	0.0282959
KN9204-Specific	chr1A:262215-262498	TraesCS1A02G000900	0.802622	0.00167597
KN9204-Specific	chr1A:262215-262498	TraesCS1A02G001100	0.703681	0.0106567
KN9204-Specific	chr1A:262215-262498	TraesCS1A02G001400	0.645032	0.0235201
KN9204-Specific	chr1A:350125-350415	TraesCS1A02G000400	0.604438	0.037361
KN9204-Specific	chr1A:350125-350415	TraesCS1A02G000900	0.779526	0.00279518
KN9204-Specific	chr1A:350125-350415	TraesCS1A02G001100	0.813225	0.0012961
KN9204-Specific	chr1A:350125-350415	TraesCS1A02G001400	0.73591	0.00636283
KN9204-Specific	chr1A:350125-350415	TraesCS1A02G001600	0.700384	0.0111935
KN9204-Specific	chr1A:354015-354625	TraesCS1A02G000200	0.602426	0.0381703
KN9204-Specific	chr1A:354015-354625	TraesCS1A02G000400	0.690153	0.0129873
KN9204-Specific	chr1A:354015-354625	TraesCS1A02G000900	0.858783	0.000347247
KN9204-Specific	chr1A:354015-354625	TraesCS1A02G001100	0.796741	0.00192048
KN9204-Specific	chr1A:354015-354625	TraesCS1A02G001400	0.73173	0.00682954
KN9204-Specific	chr1A:368968-369240	TraesCS1A02G000400	0.63168	0.027571
KN9204-Specific	chr1A:368968-369240	TraesCS1A02G000900	0.780876	0.00271733
KN9204-Specific	chr1A:368968-369240	TraesCS1A02G001100	0.742509	0.00567543
KN9204-Specific	chr1A:368968-369240	TraesCS1A02G001400	0.710236	0.00964668
KN9204-Specific	chr1A:368968-369240	TraesCS1A02G001600	0.597096	0.0403752
KN9204-Specific	chr1A:398405-398692	TraesCS1A02G000200	0.585258	0.0455924
KN9204-Specific	chr1A:398405-398692	TraesCS1A02G000400	0.645161	0.0234834
KN9204-Specific	chr1A:398405-398692	TraesCS1A02G000900	0.754444	0.00457597
KN9204-Specific	chr1A:398405-398692	TraesCS1A02G001100	0.701135	0.0110696
KN9204-Specific	chr1A:398405-398692	TraesCS1A02G001400	0.680989	0.0147671
KN9204-Specific	chr1A:398405-398692	TraesCS1A02G001600	0.583658	0.0463322
KN9204-Specific	chr1A:405037-405258	TraesCS1A02G000200	0.649533	0.0222578
KN9204-Specific	chr1A:405037-405258	TraesCS1A02G000300	0.606426	0.0365732
KN9204-Specific	chr1A:405037-405258	TraesCS1A02G000400	0.68542	0.0138856
KN9204-Specific	chr1A:405037-405258	TraesCS1A02G000900	0.842372	0.000584478
KN9204-Specific	chr1A:405037-405258	TraesCS1A02G001100	0.734448	0.00652329
KN9204-Specific	chr1A:405037-405258	TraesCS1A02G001400	0.694271	0.0122415
KN9204-Specific	chr1A:1086801-1087089	TraesCS1A02G002400	0.672235	0.0166293
KN9204-Specific	chr1A:1120400-1120997	TraesCS1A02G002000	0.594118	0.0416453
KN9204-Specific	chr1A:1120400-1120997	TraesCS1A02G002400	0.678837	0.0152098
KN9204-Specific	chr1A:2815669-2815935	TraesCS1A02G004900	0.611148	0.0347498
KN9204-Specific	chr1A:2856564-2856811	TraesCS1A02G003800	0.586749	0.0449104
KN9204-Specific	chr1A:3198253-3198725	TraesCS1A02G005387	0.592469	0.0423608
KN9204-Specific	chr1A:3198253-3198725	TraesCS1A02G005500	0.732171	0.00677916
KN9204-Specific	chr1A:3368941-3369153	TraesCS1A02G005387	0.78867	0.00229953
KN9204-Specific	chr1A:3368941-3369153	TraesCS1A02G005500	0.846089	0.000522171
KN9204-Specific	chr1A:3368941-3369153	TraesCS1A02G007200	0.926282	1.51357e-05
KN9204-Specific	chr1A:3405125-3405381	TraesCS1A02G005500	0.702497	0.0108473
KN9204-Specific	chr1A:3405125-3405381	TraesCS1A02G007200	0.732596	0.00673086
KN9204-Specific	chr1A:6734653-6735190	TraesCS1A02G011700	0.607504	0.0361509
KN9204-Specific	chr1A:9180394-9180620	TraesCS1A02G017000	0.625065	0.0297542
KN9204-Specific	chr1A:9180394-9180620	TraesCS1A02G018900	0.663527	0.0186474
KN9204-Specific	chr1A:9196447-9196598	TraesCS1A02G016600	0.590712	0.0431331
KN9204-Specific	chr1A:9196447-9196598	TraesCS1A02G017600	0.678653	0.0152482
KN9204-Specific	chr1A:9196447-9196598	TraesCS1A02G018900	0.610333	0.0350595
KN9204-Specific	chr1A:9345000-9345219	TraesCS1A02G018000	0.596344	0.040693
KN9204-Specific	chr1A:9345000-9345219	TraesCS1A02G018500	0.596254	0.0407314
KN9204-Specific	chr1A:9597435-9597566	TraesCS1A02G018900	0.596034	0.0408248
KN9204-Specific	chr1A:9597435-9597566	TraesCS1A02G020100	0.629662	0.0282244
KN9204-Specific	chr1A:11247463-11247586	TraesCS1A02G022800	0.620675	0.0312704
KN9204-Specific	chr1A:12039641-12039853	TraesCS1A02G024200	0.80458	0.0016001
KN9204-Specific	chr1A:12115177-12115653	TraesCS1A02G024200	0.722928	0.00789589
KN9204-Specific	chr1A:13423266-13424138	TraesCS1A02G028600	0.621872	0.0308517
KN9204-Specific	chr1A:13423266-13424138	TraesCS1A02G028900	0.760039	0.0041199
KN9204-Specific	chr1A:13423266-13424138	TraesCS1A02G029100	0.779211	0.00281363
KN9204-Specific	chr1A:13424514-13424750	TraesCS1A02G028900	0.697614	0.0116598
KN9204-Specific	chr1A:13424514-13424750	TraesCS1A02G029100	0.777282	0.00292842
KN9204-Specific	chr1A:13425409-13425712	TraesCS1A02G028500	0.62769	0.0288738
KN9204-Specific	chr1A:13425409-13425712	TraesCS1A02G028900	0.833895	0.000748134
KN9204-Specific	chr1A:13425409-13425712	TraesCS1A02G029000	0.620149	0.0314555
KN9204-Specific	chr1A:13425409-13425712	TraesCS1A02G029100	0.866167	0.000268933
KN9204-Specific	chr1A:13429684-13430314	TraesCS1A02G028600	0.603884	0.0375826
KN9204-Specific	chr1A:13429684-13430314	TraesCS1A02G028900	0.815432	0.00122615
KN9204-Specific	chr1A:13429684-13430314	TraesCS1A02G029100	0.734644	0.00650158
KN9204-Specific	chr1A:13460403-13460799	TraesCS1A02G028700	0.682003	0.0145618
KN9204-Specific	chr1A:13460403-13460799	TraesCS1A02G028900	0.748678	0.00508485
KN9204-Specific	chr1A:13460403-13460799	TraesCS1A02G029100	0.934202	8.69102e-06
KN9204-Specific	chr1A:13461048-13461304	TraesCS1A02G028600	0.590761	0.0431111
KN9204-Specific	chr1A:13461048-13461304	TraesCS1A02G028700	0.603008	0.0379349
KN9204-Specific	chr1A:13461048-13461304	TraesCS1A02G028900	0.709155	0.00980819
KN9204-Specific	chr1A:13461048-13461304	TraesCS1A02G029100	0.841259	0.000604229
KN9204-Specific	chr1A:13486289-13486413	TraesCS1A02G028700	0.62111	0.0311176
KN9204-Specific	chr1A:13486289-13486413	TraesCS1A02G028900	0.769199	0.00344863
KN9204-Specific	chr1A:13486289-13486413	TraesCS1A02G029100	0.930783	1.11312e-05
KN9204-Specific	chr1A:13486683-13487255	TraesCS1A02G028600	0.638049	0.0255806
KN9204-Specific	chr1A:13486683-13487255	TraesCS1A02G028900	0.707012	0.0101341
KN9204-Specific	chr1A:13486683-13487255	TraesCS1A02G029100	0.807392	0.00149577
KN9204-Specific	chr1A:13488247-13488544	TraesCS1A02G028600	0.579651	0.0482228
KN9204-Specific	chr1A:13488247-13488544	TraesCS1A02G028900	0.79684	0.00191617
KN9204-Specific	chr1A:13488247-13488544	TraesCS1A02G029100	0.859053	0.000344096
KN9204-Specific	chr1A:13490035-13490311	TraesCS1A02G028600	0.671151	0.0168713
KN9204-Specific	chr1A:13490035-13490311	TraesCS1A02G028900	0.746525	0.00528544
KN9204-Specific	chr1A:13490035-13490311	TraesCS1A02G029100	0.776117	0.0029994
KN9204-Specific	chr1A:13494522-13495409	TraesCS1A02G028600	0.579147	0.0484642
KN9204-Specific	chr1A:13494522-13495409	TraesCS1A02G028900	0.819197	0.00111358
KN9204-Specific	chr1A:13494522-13495409	TraesCS1A02G029100	0.863194	0.0002986
KN9204-Specific	chr1A:13584566-13584678	TraesCS1A02G029100	0.695257	0.0120678
KN9204-Specific	chr1A:13585483-13585778	TraesCS1A02G027900	0.634818	0.0265769
KN9204-Specific	chr1A:13585483-13585778	TraesCS1A02G028600	0.633065	0.027129
KN9204-Specific	chr1A:13586097-13586537	TraesCS1A02G028500	0.584552	0.0459179
KN9204-Specific	chr1A:13586097-13586537	TraesCS1A02G028900	0.815583	0.00122149
KN9204-Specific	chr1A:13586097-13586537	TraesCS1A02G029000	0.59329	0.0420038
KN9204-Specific	chr1A:13586097-13586537	TraesCS1A02G029100	0.89873	7.06169e-05
KN9204-Specific	chr1A:13587545-13587810	TraesCS1A02G028900	0.723301	0.00784833
KN9204-Specific	chr1A:13587545-13587810	TraesCS1A02G029100	0.853858	0.00040861
KN9204-Specific	chr1A:13588372-13588670	TraesCS1A02G028500	0.714012	0.00909825
KN9204-Specific	chr1A:13588372-13588670	TraesCS1A02G028900	0.941013	5.09172e-06
KN9204-Specific	chr1A:13588372-13588670	TraesCS1A02G029000	0.765842	0.00368419
KN9204-Specific	chr1A:13588372-13588670	TraesCS1A02G029100	0.820109	0.00108754
KN9204-Specific	chr1A:13589029-13589751	TraesCS1A02G028500	0.735964	0.00635696
KN9204-Specific	chr1A:13589029-13589751	TraesCS1A02G028900	0.902733	5.81229e-05
KN9204-Specific	chr1A:13589029-13589751	TraesCS1A02G029000	0.864877	0.000281516
KN9204-Specific	chr1A:13589029-13589751	TraesCS1A02G029100	0.825651	0.000939262
KN9204-Specific	chr1A:13592266-13592892	TraesCS1A02G028500	0.658725	0.019834
KN9204-Specific	chr1A:13592266-13592892	TraesCS1A02G028900	0.863669	0.000293697
KN9204-Specific	chr1A:13592266-13592892	TraesCS1A02G029000	0.645297	0.0234446
KN9204-Specific	chr1A:13592266-13592892	TraesCS1A02G029100	0.878605	0.000168772
KN9204-Specific	chr1A:13620133-13620848	TraesCS1A02G028500	0.706696	0.0101829
KN9204-Specific	chr1A:13620133-13620848	TraesCS1A02G028900	0.895534	8.20299e-05
KN9204-Specific	chr1A:13620133-13620848	TraesCS1A02G029000	0.670008	0.0171294
KN9204-Specific	chr1A:13620133-13620848	TraesCS1A02G029100	0.902477	5.88637e-05
KN9204-Specific	chr1A:13621321-13621637	TraesCS1A02G028700	0.720547	0.00820453
KN9204-Specific	chr1A:13621321-13621637	TraesCS1A02G029100	0.760883	0.00405421
KN9204-Specific	chr1A:13622476-13622612	TraesCS1A02G029100	0.597858	0.0400545
KN9204-Specific	chr1A:13624567-13625044	TraesCS1A02G028500	0.798972	0.00182472
KN9204-Specific	chr1A:13624567-13625044	TraesCS1A02G028900	0.97617	5.81445e-08
KN9204-Specific	chr1A:13624567-13625044	TraesCS1A02G029000	0.830212	0.000829391
KN9204-Specific	chr1A:13624567-13625044	TraesCS1A02G029100	0.827422	0.000895363
KN9204-Specific	chr1A:13625541-13625745	TraesCS1A02G028500	0.767988	0.00353222
KN9204-Specific	chr1A:13625541-13625745	TraesCS1A02G028900	0.921016	2.11789e-05
KN9204-Specific	chr1A:13625541-13625745	TraesCS1A02G029000	0.929464	1.2205e-05
KN9204-Specific	chr1A:13625541-13625745	TraesCS1A02G029100	0.788136	0.00232646
KN9204-Specific	chr1A:13625834-13625987	TraesCS1A02G028500	0.57892	0.0485733
KN9204-Specific	chr1A:13625834-13625987	TraesCS1A02G028900	0.727522	0.00732486
KN9204-Specific	chr1A:13625834-13625987	TraesCS1A02G029000	0.828914	0.000859592
KN9204-Specific	chr1A:13641971-13642206	TraesCS1A02G028500	0.788949	0.00228552
KN9204-Specific	chr1A:13641971-13642206	TraesCS1A02G028900	0.945497	3.45517e-06
KN9204-Specific	chr1A:13641971-13642206	TraesCS1A02G029000	0.803368	0.00164674
KN9204-Specific	chr1A:13641971-13642206	TraesCS1A02G029100	0.917421	2.62951e-05
KN9204-Specific	chr1A:13642567-13642889	TraesCS1A02G028500	0.670611	0.0169929
KN9204-Specific	chr1A:13642567-13642889	TraesCS1A02G028900	0.892501	9.41514e-05
KN9204-Specific	chr1A:13642567-13642889	TraesCS1A02G029000	0.717304	0.00863947
KN9204-Specific	chr1A:13642567-13642889	TraesCS1A02G029100	0.845224	0.000536195
KN9204-Specific	chr1A:13643261-13644167	TraesCS1A02G028500	0.680237	0.0149208
KN9204-Specific	chr1A:13643261-13644167	TraesCS1A02G028900	0.884847	0.000131036
KN9204-Specific	chr1A:13643261-13644167	TraesCS1A02G029000	0.714135	0.0090808
KN9204-Specific	chr1A:13643261-13644167	TraesCS1A02G029100	0.914475	3.1174e-05
KN9204-Specific	chr1A:13644547-13644784	TraesCS1A02G028500	0.747026	0.00523823
KN9204-Specific	chr1A:13644547-13644784	TraesCS1A02G028900	0.903201	5.67837e-05
KN9204-Specific	chr1A:13644547-13644784	TraesCS1A02G029000	0.841799	0.000594585
KN9204-Specific	chr1A:13644547-13644784	TraesCS1A02G029100	0.837574	0.000673278
KN9204-Specific	chr1A:13658888-13659167	TraesCS1A02G028500	0.736931	0.00625261
KN9204-Specific	chr1A:13658888-13659167	TraesCS1A02G028900	0.909108	4.18724e-05
KN9204-Specific	chr1A:13658888-13659167	TraesCS1A02G029000	0.785164	0.00248088
KN9204-Specific	chr1A:13658888-13659167	TraesCS1A02G029100	0.926652	1.47685e-05
KN9204-Specific	chr1A:13902712-13903945	TraesCS1A02G028600	0.628634	0.0285616
KN9204-Specific	chr1A:13902712-13903945	TraesCS1A02G028900	0.761368	0.00401686
KN9204-Specific	chr1A:13902712-13903945	TraesCS1A02G029100	0.842755	0.00057782
KN9204-Specific	chr1A:13904454-13904715	TraesCS1A02G028600	0.654856	0.0208294
KN9204-Specific	chr1A:13904454-13904715	TraesCS1A02G028900	0.760626	0.00407414
KN9204-Specific	chr1A:13904454-13904715	TraesCS1A02G029100	0.811998	0.00133628
KN9204-Specific	chr1A:13908998-13909190	TraesCS1A02G028600	0.714731	0.00899653
KN9204-Specific	chr1A:13909472-13909737	TraesCS1A02G028700	0.607384	0.0361977
KN9204-Specific	chr1A:13909472-13909737	TraesCS1A02G029100	0.77143	0.00329851
KN9204-Specific	chr1A:13915975-13916320	TraesCS1A02G028900	0.849223	0.000473753
KN9204-Specific	chr1A:13915975-13916320	TraesCS1A02G029000	0.674411	0.0161512
KN9204-Specific	chr1A:13915975-13916320	TraesCS1A02G029100	0.923001	1.8712e-05
KN9204-Specific	chr1A:13916609-13916870	TraesCS1A02G028900	0.841949	0.000591928
KN9204-Specific	chr1A:13916609-13916870	TraesCS1A02G029100	0.865632	0.000274096
KN9204-Specific	chr1A:13918356-13919057	TraesCS1A02G028900	0.857752	0.000359446
KN9204-Specific	chr1A:13918356-13919057	TraesCS1A02G029100	0.882635	0.000143562
KN9204-Specific	chr1A:13919240-13919361	TraesCS1A02G028900	0.844648	0.00054569
KN9204-Specific	chr1A:13919240-13919361	TraesCS1A02G029000	0.736659	0.00628189
KN9204-Specific	chr1A:13919240-13919361	TraesCS1A02G029100	0.89597	8.03922e-05
KN9204-Specific	chr1A:13942003-13942299	TraesCS1A02G028900	0.816262	0.00120062
KN9204-Specific	chr1A:13942003-13942299	TraesCS1A02G029100	0.872502	0.000213388
KN9204-Specific	chr1A:13943068-13943439	TraesCS1A02G028900	0.756855	0.004375
KN9204-Specific	chr1A:13943068-13943439	TraesCS1A02G029100	0.787458	0.00236104
KN9204-Specific	chr1A:13943498-13943777	TraesCS1A02G028900	0.911622	3.65507e-05
KN9204-Specific	chr1A:13943498-13943777	TraesCS1A02G029000	0.784765	0.00250221
KN9204-Specific	chr1A:13943498-13943777	TraesCS1A02G029100	0.827571	0.000891738
KN9204-Specific	chr1A:13963713-13963914	TraesCS1A02G028900	0.6575	0.0201452
KN9204-Specific	chr1A:13968431-13968605	TraesCS1A02G028900	0.62926	0.0283559
KN9204-Specific	chr1A:13968431-13968605	TraesCS1A02G029100	0.7538	0.00463079
KN9204-Specific	chr1A:15546738-15547028	TraesCS1A02G032700	0.730936	0.00692106
KN9204-Specific	chr1A:15546738-15547028	TraesCS1A02G033288	0.627202	0.0290359
KN9204-Specific	chr1A:16096484-16096759	TraesCS1A02G033800	0.831547	0.000799187
KN9204-Specific	chr1A:16097004-16097246	TraesCS1A02G033800	0.675031	0.0160167
KN9204-Specific	chr1A:16097400-16097737	TraesCS1A02G033800	0.648035	0.0226724
KN9204-Specific	chr1A:16234851-16235597	TraesCS1A02G033800	0.678223	0.0153379
KN9204-Specific	chr1A:16437734-16437869	TraesCS1A02G033800	0.760869	0.00405532
KN9204-Specific	chr1A:16438838-16439022	TraesCS1A02G033800	0.825572	0.000941271
KN9204-Specific	chr1A:16439629-16440079	TraesCS1A02G033800	0.809877	0.00140801
KN9204-Specific	chr1A:16440833-16441438	TraesCS1A02G033800	0.744888	0.00544181
KN9204-Specific	chr1A:16554452-16555091	TraesCS1A02G033800	0.834108	0.000743637
KN9204-Specific	chr1A:16860661-16861134	TraesCS1A02G033800	0.789676	0.00224937
KN9204-Specific	chr1A:16867544-16867726	TraesCS1A02G033800	0.612142	0.0343743
KN9204-Specific	chr1A:16897458-16897665	TraesCS1A02G033800	0.723933	0.00776823
KN9204-Specific	chr1A:17135679-17136113	TraesCS1A02G034100	0.632135	0.0274252
KN9204-Specific	chr1A:19262145-19262348	TraesCS1A02G035600	0.63293	0.0271718
KN9204-Specific	chr1A:19693979-19694249	TraesCS1A02G036100	0.659878	0.0195441
KN9204-Specific	chr1A:21337989-21338329	TraesCS1A02G039100	0.616157	0.0328875
KN9204-Specific	chr1A:21344056-21344249	TraesCS1A02G039100	0.602892	0.0379816
KN9204-Specific	chr1A:24140707-24141061	TraesCS1A02G043400	0.914902	3.04249e-05
KN9204-Specific	chr1A:24147799-24148098	TraesCS1A02G043400	0.926022	1.53977e-05
KN9204-Specific	chr1A:24565807-24565983	TraesCS1A02G043400	0.696956	0.0117727
KN9204-Specific	chr1A:24574707-24574899	TraesCS1A02G043400	0.950027	2.25641e-06
KN9204-Specific	chr1A:24575154-24575936	TraesCS1A02G043400	0.983827	8.48071e-09
KN9204-Specific	chr1A:24576717-24576935	TraesCS1A02G043400	0.896783	7.7411e-05
KN9204-Specific	chr1A:24626944-24627133	TraesCS1A02G043400	0.850239	0.00045883
KN9204-Specific	chr1A:24628208-24628435	TraesCS1A02G043400	0.805301	0.00157283
KN9204-Specific	chr1A:26530115-26530292	TraesCS1A02G045400	0.617145	0.032529
KN9204-Specific	chr1A:27381822-27382154	TraesCS1A02G045500	0.595389	0.0410999
KN9204-Specific	chr1A:28375610-28376238	TraesCS1A02G046500	0.577572	0.0492244
KN9204-Specific	chr1A:29011682-29011969	TraesCS1A02G046500	0.696988	0.0117671
KN9204-Specific	chr1A:29012334-29012531	TraesCS1A02G046500	0.60889	0.0356135
KN9204-Specific	chr1A:30277394-30277602	TraesCS1A02G048200	0.577421	0.049298
KN9204-Specific	chr1A:30457290-30457555	TraesCS1A02G049300	0.591004	0.043004
KN9204-Specific	chr1A:32847005-32847251	TraesCS1A02G051500	0.699974	0.0112616
KN9204-Specific	chr1A:32874454-32874607	TraesCS1A02G051500	0.594547	0.0414606
KN9204-Specific	chr1A:44331195-44331442	TraesCS1A02G063300	0.66889	0.0173844
KN9204-Specific	chr1A:44511183-44511963	TraesCS1A02G063300	0.718584	0.00846573
KN9204-Specific	chr1A:44517511-44517868	TraesCS1A02G063300	0.701475	0.0110137
KN9204-Specific	chr1A:44518461-44518641	TraesCS1A02G063300	0.755917	0.00445234
KN9204-Specific	chr1A:44519101-44519371	TraesCS1A02G063300	0.788139	0.0023263
KN9204-Specific	chr1A:47727690-47727977	TraesCS1A02G065600	0.75971	0.00414574
KN9204-Specific	chr1A:47822052-47822885	TraesCS1A02G065600	0.827225	0.000900167
KN9204-Specific	chr1A:48108855-48109852	TraesCS1A02G065600	0.835611	0.000712463
KN9204-Specific	chr1A:48196543-48196765	TraesCS1A02G065600	0.891505	9.84261e-05
KN9204-Specific	chr1A:48196814-48196987	TraesCS1A02G065600	0.941789	4.77165e-06
KN9204-Specific	chr1A:48199828-48199959	TraesCS1A02G065600	0.932552	9.80899e-06
KN9204-Specific	chr1A:48247766-48248128	TraesCS1A02G065600	0.711094	0.00951999
KN9204-Specific	chr1A:52664167-52664333	TraesCS1A02G070100	0.711632	0.00944119
KN9204-Specific	chr1A:53356032-53356322	TraesCS1A02G070500	0.822291	0.00102717
KN9204-Specific	chr1A:53429501-53429767	TraesCS1A02G070500	0.708465	0.0099122
KN9204-Specific	chr1A:53549757-53550289	TraesCS1A02G070800	0.781246	0.00269628
KN9204-Specific	chr1A:53550618-53551137	TraesCS1A02G070800	0.770284	0.00337503
KN9204-Specific	chr1A:58253766-58254608	TraesCS1A02G075300	0.697327	0.0117089
KN9204-Specific	chr1A:58253766-58254608	TraesCS1A02G075400	0.65916	0.0197241
KN9204-Specific	chr1A:61294452-61294688	TraesCS1A02G078300	0.651912	0.0216108
KN9204-Specific	chr1A:61344466-61344640	TraesCS1A02G078300	0.718143	0.00852526
KN9204-Specific	chr1A:61345449-61345585	TraesCS1A02G078300	0.746785	0.00526091
KN9204-Specific	chr1A:97176673-97177049	TraesCS1A02G101000	0.637457	0.0257611
KN9204-Specific	chr1A:97181633-97182293	TraesCS1A02G101000	0.854136	0.000404929
KN9204-Specific	chr1A:97259953-97260747	TraesCS1A02G101000	0.875111	0.000193312
KN9204-Specific	chr1A:97266732-97267121	TraesCS1A02G101000	0.88653	0.000122097
KN9204-Specific	chr1A:97364443-97364715	TraesCS1A02G101000	0.841926	0.000592333
KN9204-Specific	chr1A:97423425-97423992	TraesCS1A02G101000	0.874852	0.000195235
KN9204-Specific	chr1A:97947146-97947491	TraesCS1A02G101000	0.676294	0.0157456
KN9204-Specific	chr1A:124042384-124042716	TraesCS1A02G116500	0.594196	0.0416116
KN9204-Specific	chr1A:137798446-137798824	TraesCS1A02G122300	0.592725	0.0422494
KN9204-Specific	chr1A:137799363-137799937	TraesCS1A02G122300	0.629369	0.0283203
KN9204-Specific	chr1A:144562802-144562923	TraesCS1A02G123800	0.81803	0.00114758
KN9204-Specific	chr1A:144563014-144563759	TraesCS1A02G123800	0.740865	0.00584114
KN9204-Specific	chr1A:144627829-144628056	TraesCS1A02G123800	0.963173	5.01483e-07
KN9204-Specific	chr1A:144628275-144628397	TraesCS1A02G123800	0.797776	0.00187562
KN9204-Specific	chr1A:144628526-144628759	TraesCS1A02G123800	0.861831	0.000313025
KN9204-Specific	chr1A:144629077-144629327	TraesCS1A02G123800	0.935797	7.70866e-06
KN9204-Specific	chr1A:144630057-144630529	TraesCS1A02G123800	0.835738	0.000709863
KN9204-Specific	chr1A:144634255-144635183	TraesCS1A02G123800	0.652736	0.0213901
KN9204-Specific	chr1A:145167262-145167956	TraesCS1A02G123900	0.686056	0.0137622
KN9204-Specific	chr1A:163850077-163850491	TraesCS1A02G129200	0.763757	0.00383647
KN9204-Specific	chr1A:163850664-163850990	TraesCS1A02G129200	0.694008	0.0122883
KN9204-Specific	chr1A:166660804-166661047	TraesCS1A02G129600	0.575996	0.0499936
KN9204-Specific	chr1A:166664048-166664160	TraesCS1A02G129600	0.681309	0.0147021
KN9204-Specific	chr1A:166664344-166664647	TraesCS1A02G129600	0.671909	0.0167018
KN9204-Specific	chr1A:185138764-185138876	TraesCS1A02G132900	0.580821	0.0476651
KN9204-Specific	chr1A:264375755-264375975	TraesCS1A02G152800	0.632518	0.0273031
KN9204-Specific	chr1A:296668943-296669353	TraesCS1A02G164400	0.772122	0.00325303
KN9204-Specific	chr1A:320508681-320508904	TraesCS1A02G177700	0.771109	0.00331983
KN9204-Specific	chr1A:320624501-320624788	TraesCS1A02G177700	0.625116	0.0297371
KN9204-Specific	chr1A:320632647-320633454	TraesCS1A02G177700	0.680521	0.0148626
KN9204-Specific	chr1A:320632647-320633454	TraesCS1A02G177800	0.632424	0.0273329
KN9204-Specific	chr1A:320901857-320902252	TraesCS1A02G177700	0.826426	0.000919843
KN9204-Specific	chr1A:320901857-320902252	TraesCS1A02G177800	0.783536	0.00256873
KN9204-Specific	chr1A:320904292-320904416	TraesCS1A02G177700	0.736765	0.00627042
KN9204-Specific	chr1A:320904292-320904416	TraesCS1A02G177800	0.73462	0.00650425
KN9204-Specific	chr1A:320908187-320908601	TraesCS1A02G177700	0.894513	8.59655e-05
KN9204-Specific	chr1A:320908187-320908601	TraesCS1A02G177800	0.822055	0.00103357
KN9204-Specific	chr1A:321185160-321185693	TraesCS1A02G177700	0.663964	0.0185419
KN9204-Specific	chr1A:321185160-321185693	TraesCS1A02G178100	0.6744	0.0161535
KN9204-Specific	chr1A:321251323-321252513	TraesCS1A02G177700	0.704547	0.010519
KN9204-Specific	chr1A:321251323-321252513	TraesCS1A02G177800	0.657818	0.020064
KN9204-Specific	chr1A:321251323-321252513	TraesCS1A02G178100	0.785198	0.00247908
KN9204-Specific	chr1A:321279783-321280154	TraesCS1A02G177700	0.857132	0.000366953
KN9204-Specific	chr1A:321279783-321280154	TraesCS1A02G177800	0.813583	0.00128455
KN9204-Specific	chr1A:321279783-321280154	TraesCS1A02G178100	0.733278	0.00665384
KN9204-Specific	chr1A:321281098-321281845	TraesCS1A02G177700	0.962602	5.41055e-07
KN9204-Specific	chr1A:321281098-321281845	TraesCS1A02G177800	0.907728	4.50412e-05
KN9204-Specific	chr1A:321281098-321281845	TraesCS1A02G178100	0.835749	0.000709654
KN9204-Specific	chr1A:321282617-321282748	TraesCS1A02G177700	0.883971	0.00013589
KN9204-Specific	chr1A:321282617-321282748	TraesCS1A02G177800	0.796633	0.00192523
KN9204-Specific	chr1A:321282617-321282748	TraesCS1A02G178100	0.672377	0.0165977
KN9204-Specific	chr1A:321291087-321291341	TraesCS1A02G177700	0.838019	0.000664617
KN9204-Specific	chr1A:321291087-321291341	TraesCS1A02G177800	0.741864	0.00574
KN9204-Specific	chr1A:321291087-321291341	TraesCS1A02G178100	0.690751	0.0128769
KN9204-Specific	chr1A:321293505-321293738	TraesCS1A02G177700	0.760671	0.00407062
KN9204-Specific	chr1A:321293505-321293738	TraesCS1A02G177800	0.669735	0.0171913
KN9204-Specific	chr1A:321293505-321293738	TraesCS1A02G178100	0.633343	0.027041
KN9204-Specific	chr1A:321400051-321400268	TraesCS1A02G177800	0.807481	0.00149258
KN9204-Specific	chr1A:321400051-321400268	TraesCS1A02G178100	0.892421	9.44918e-05
KN9204-Specific	chr1A:321400051-321400268	TraesCS1A02G178200	0.90936	4.1312e-05
KN9204-Specific	chr1A:321400051-321400268	TraesCS1A02G178300	0.888122	0.000114082
KN9204-Specific	chr1A:321400452-321400857	TraesCS1A02G177800	0.842896	0.000575362
KN9204-Specific	chr1A:321400452-321400857	TraesCS1A02G178100	0.927142	1.42944e-05
KN9204-Specific	chr1A:321400452-321400857	TraesCS1A02G178200	0.919817	2.27884e-05
KN9204-Specific	chr1A:321400452-321400857	TraesCS1A02G178300	0.904667	5.27444e-05
KN9204-Specific	chr1A:321401414-321401631	TraesCS1A02G177800	0.830658	0.000819217
KN9204-Specific	chr1A:321401414-321401631	TraesCS1A02G178100	0.942456	4.50969e-06
KN9204-Specific	chr1A:321401414-321401631	TraesCS1A02G178200	0.924022	1.75337e-05
KN9204-Specific	chr1A:321401414-321401631	TraesCS1A02G178300	0.906357	4.8373e-05
KN9204-Specific	chr1A:321472637-321473262	TraesCS1A02G177800	0.680569	0.0148528
KN9204-Specific	chr1A:321472637-321473262	TraesCS1A02G178100	0.722833	0.00790796
KN9204-Specific	chr1A:321472637-321473262	TraesCS1A02G178200	0.746804	0.00525913
KN9204-Specific	chr1A:321472637-321473262	TraesCS1A02G178300	0.710731	0.00957338
KN9204-Specific	chr1A:321560243-321560452	TraesCS1A02G177800	0.750339	0.00493405
KN9204-Specific	chr1A:321560243-321560452	TraesCS1A02G178100	0.90053	6.47613e-05
KN9204-Specific	chr1A:321560243-321560452	TraesCS1A02G178200	0.793025	0.00208854
KN9204-Specific	chr1A:321560243-321560452	TraesCS1A02G178300	0.786517	0.00240966
KN9204-Specific	chr1A:321577174-321578047	TraesCS1A02G177800	0.949986	2.26541e-06
KN9204-Specific	chr1A:321577174-321578047	TraesCS1A02G178100	0.941312	4.96626e-06
KN9204-Specific	chr1A:321577174-321578047	TraesCS1A02G178200	0.970661	1.62969e-07
KN9204-Specific	chr1A:321577174-321578047	TraesCS1A02G178300	0.910415	3.9034e-05
KN9204-Specific	chr1A:321851030-321851198	TraesCS1A02G178100	0.938852	6.07257e-06
KN9204-Specific	chr1A:321851030-321851198	TraesCS1A02G178200	0.888812	0.00011074
KN9204-Specific	chr1A:321851030-321851198	TraesCS1A02G178300	0.878011	0.00017276
KN9204-Specific	chr1A:321851449-321851712	TraesCS1A02G178100	0.74285	0.00564152
KN9204-Specific	chr1A:321851449-321851712	TraesCS1A02G178200	0.678264	0.0153294
KN9204-Specific	chr1A:321851449-321851712	TraesCS1A02G178300	0.64518	0.0234779
KN9204-Specific	chr1A:321852595-321852883	TraesCS1A02G178100	0.895438	8.23952e-05
KN9204-Specific	chr1A:321852595-321852883	TraesCS1A02G178200	0.908586	4.30488e-05
KN9204-Specific	chr1A:321852595-321852883	TraesCS1A02G178300	0.896661	7.78511e-05
KN9204-Specific	chr1A:321874991-321875191	TraesCS1A02G178100	0.924458	1.70501e-05
KN9204-Specific	chr1A:321874991-321875191	TraesCS1A02G178200	0.970091	1.79261e-07
KN9204-Specific	chr1A:321874991-321875191	TraesCS1A02G178300	0.931349	1.06938e-05
KN9204-Specific	chr1A:321897626-321897849	TraesCS1A02G178100	0.894939	8.43063e-05
KN9204-Specific	chr1A:321897626-321897849	TraesCS1A02G178200	0.874197	0.000200169
KN9204-Specific	chr1A:321897626-321897849	TraesCS1A02G178300	0.805005	0.00158399
KN9204-Specific	chr1A:321904503-321904747	TraesCS1A02G178100	0.882171	0.000146304
KN9204-Specific	chr1A:321904503-321904747	TraesCS1A02G178200	0.879188	0.000164928
KN9204-Specific	chr1A:321904503-321904747	TraesCS1A02G178300	0.872103	0.000216601
KN9204-Specific	chr1A:321906272-321906754	TraesCS1A02G178100	0.964256	4.32725e-07
KN9204-Specific	chr1A:321906272-321906754	TraesCS1A02G178200	0.974417	8.26815e-08
KN9204-Specific	chr1A:321906272-321906754	TraesCS1A02G178300	0.949536	2.36749e-06
KN9204-Specific	chr1A:321907744-321908383	TraesCS1A02G178100	0.920729	2.15554e-05
KN9204-Specific	chr1A:321907744-321908383	TraesCS1A02G178200	0.938072	6.46152e-06
KN9204-Specific	chr1A:321907744-321908383	TraesCS1A02G178300	0.883681	0.000137528
KN9204-Specific	chr1A:333637003-333637441	TraesCS1A02G183700	0.817256	0.00117056
KN9204-Specific	chr1A:342929337-342929896	TraesCS1A02G189800	0.746036	0.00533176
KN9204-Specific	chr1A:343028255-343028525	TraesCS1A02G189800	0.621311	0.0310472
KN9204-Specific	chr1A:343030338-343030859	TraesCS1A02G189800	0.826396	0.000920596
KN9204-Specific	chr1A:357129327-357130170	TraesCS1A02G198800	0.740685	0.00585959
KN9204-Specific	chr1A:359809336-359809483	TraesCS1A02G200100	0.624504	0.029945
KN9204-Specific	chr1A:359821505-359822104	TraesCS1A02G200100	0.634756	0.0265964
KN9204-Specific	chr1A:363438997-363439604	TraesCS1A02G202000	0.739649	0.00596611
KN9204-Specific	chr1A:363438997-363439604	TraesCS1A02G202100	0.631153	0.0277407
KN9204-Specific	chr1A:363438997-363439604	TraesCS1A02G202700	0.736804	0.00626624
KN9204-Specific	chr1A:363485923-363486702	TraesCS1A02G202700	0.891201	9.976e-05
KN9204-Specific	chr1A:363501248-363501450	TraesCS1A02G202700	0.826075	0.000928602
KN9204-Specific	chr1A:364019617-364020572	TraesCS1A02G202700	0.888332	0.00011306
KN9204-Specific	chr1A:372486681-372486975	TraesCS1A02G210100	0.680195	0.0149294
KN9204-Specific	chr1A:444436470-444436654	TraesCS1A02G253200	0.576542	0.0497262
KN9204-Specific	chr1A:487616237-487616516	TraesCS1A02G291600	0.719407	0.00835554
KN9204-Specific	chr1A:487616237-487616516	TraesCS1A02G292000	0.653425	0.0212067
KN9204-Specific	chr1A:487616237-487616516	TraesCS1A02G292100	0.685162	0.0139357
KN9204-Specific	chr1A:487616237-487616516	TraesCS1A02G292200	0.600657	0.0388924
KN9204-Specific	chr1A:487616237-487616516	TraesCS1A02G292300	0.615473	0.0331374
KN9204-Specific	chr1A:505217535-505217990	TraesCS1A02G313500	0.682648	0.0144323
KN9204-Specific	chr1A:508277928-508278135	TraesCS1A02G316100	0.738447	0.00609158
KN9204-Specific	chr1A:508277928-508278135	TraesCS1A02G316900	0.805654	0.00155963
KN9204-Specific	chr1A:508277928-508278135	TraesCS1A02G317100	0.793188	0.00208091
KN9204-Specific	chr1A:508318549-508318730	TraesCS1A02G316100	0.653653	0.0211462
KN9204-Specific	chr1A:508318549-508318730	TraesCS1A02G316900	0.835051	0.000723956
KN9204-Specific	chr1A:508318549-508318730	TraesCS1A02G317100	0.699891	0.0112755
KN9204-Specific	chr1A:508327334-508327664	TraesCS1A02G316900	0.818067	0.0011465
KN9204-Specific	chr1A:508335734-508336176	TraesCS1A02G316900	0.759463	0.00416522
KN9204-Specific	chr1A:508335734-508336176	TraesCS1A02G317100	0.646752	0.023032
KN9204-Specific	chr1A:508346920-508347147	TraesCS1A02G316100	0.747069	0.00523418
KN9204-Specific	chr1A:508346920-508347147	TraesCS1A02G316900	0.806372	0.00153299
KN9204-Specific	chr1A:508346920-508347147	TraesCS1A02G317100	0.825515	0.000942716
KN9204-Specific	chr1A:515273997-515274267	TraesCS1A02G324300	0.66964	0.0172129
KN9204-Specific	chr1A:516007411-516007707	TraesCS1A02G325600	0.645283	0.0234487
KN9204-Specific	chr1A:516008627-516008992	TraesCS1A02G325600	0.57935	0.0483666
KN9204-Specific	chr1A:516417975-516418325	TraesCS1A02G325600	0.679498	0.0150728
KN9204-Specific	chr1A:516421519-516422366	TraesCS1A02G325600	0.658909	0.0197875
KN9204-Specific	chr1A:528089609-528090127	TraesCS1A02G338100	0.655901	0.0205571
KN9204-Specific	chr1A:533051137-533051926	TraesCS1A02G345000	0.605288	0.0370225
KN9204-Specific	chr1A:533051137-533051926	TraesCS1A02G345300	0.929059	1.25515e-05
KN9204-Specific	chr1A:533051137-533051926	TraesCS1A02G347900	0.581797	0.0472035
KN9204-Specific	chr1A:546941037-546941332	TraesCS1A02G369400	0.581962	0.0471261
KN9204-Specific	chr1A:550905146-550905325	TraesCS1A02G378900	0.695053	0.0121036
KN9204-Specific	chr1A:550906763-550906964	TraesCS1A02G378900	0.615836	0.0330046
KN9204-Specific	chr1A:550907141-550907369	TraesCS1A02G378900	0.695977	0.011942
KN9204-Specific	chr1A:550908725-550909163	TraesCS1A02G378900	0.615066	0.0332869
KN9204-Specific	chr1A:550910430-550910752	TraesCS1A02G378900	0.581356	0.0474118
KN9204-Specific	chr1A:550948811-550949112	TraesCS1A02G378900	0.70623	0.0102551
KN9204-Specific	chr1A:550956794-550957775	TraesCS1A02G378900	0.675074	0.0160074
KN9204-Specific	chr1A:550965364-550965539	TraesCS1A02G378900	0.585757	0.0453635
KN9204-Specific	chr1A:551134068-551134285	TraesCS1A02G378900	0.758466	0.00424445
KN9204-Specific	chr1A:551134068-551134285	TraesCS1A02G379000	0.60961	0.0353362
KN9204-Specific	chr1A:551134068-551134285	TraesCS1A02G379500	0.621652	0.0309281
KN9204-Specific	chr1A:551172687-551172828	TraesCS1A02G378900	0.587337	0.0446433
KN9204-Specific	chr1A:551172687-551172828	TraesCS1A02G379500	0.5796	0.0482471
KN9204-Specific	chr1A:551580557-551580942	TraesCS1A02G378900	0.68242	0.014478
KN9204-Specific	chr1A:551580557-551580942	TraesCS1A02G379500	0.673857	0.0162719
KN9204-Specific	chr1A:551870401-551870621	TraesCS1A02G379500	0.652221	0.021528
KN9204-Specific	chr1A:551871063-551871189	TraesCS1A02G379500	0.736662	0.00628152
KN9204-Specific	chr1A:554051338-554051480	TraesCS1A02G383500	0.813568	0.00128504
KN9204-Specific	chr1A:554057066-554057217	TraesCS1A02G383500	0.778858	0.00283433
KN9204-Specific	chr1A:554542543-554543036	TraesCS1A02G383500	0.726407	0.00746046
KN9204-Specific	chr1A:554550502-554551486	TraesCS1A02G383500	0.81284	0.0013086
KN9204-Specific	chr1A:555921660-555922030	TraesCS1A02G387100	0.633856	0.0268789
KN9204-Specific	chr1A:555973512-555973722	TraesCS1A02G387100	0.75504	0.00452563
KN9204-Specific	chr1A:556519825-556520009	TraesCS1A02G388000	0.591879	0.0426192
KN9204-Specific	chr1A:557178938-557180066	TraesCS1A02G388000	0.611639	0.0345637
KN9204-Specific	chr1A:563115346-563115533	TraesCS1A02G397000	0.700711	0.0111394
KN9204-Specific	chr1A:564146130-564146397	TraesCS1A02G400000	0.797748	0.00187681
KN9204-Specific	chr1A:564162456-564162762	TraesCS1A02G400000	0.576884	0.0495592
KN9204-Specific	chr1A:564162456-564162762	TraesCS1A02G400700	0.582491	0.0468775
KN9204-Specific	chr1A:564201349-564201512	TraesCS1A02G400000	0.824694	0.0009637
KN9204-Specific	chr1A:564207552-564207739	TraesCS1A02G400000	0.840699	0.000614349
KN9204-Specific	chr1A:564207552-564207739	TraesCS1A02G400700	0.599729	0.0392751
KN9204-Specific	chr1A:564251483-564251724	TraesCS1A02G400000	0.756479	0.00440584
KN9204-Specific	chr1A:564315515-564315646	TraesCS1A02G400000	0.597792	0.0400819
KN9204-Specific	chr1A:564677787-564678219	TraesCS1A02G400700	0.62955	0.0282609
KN9204-Specific	chr1A:565748234-565748499	TraesCS1A02G402200	0.610795	0.0348837
KN9204-Specific	chr1A:565858452-565859009	TraesCS1A02G402200	0.700536	0.0111683
KN9204-Specific	chr1A:565859543-565859803	TraesCS1A02G402200	0.600952	0.0387711
KN9204-Specific	chr1A:566163270-566163524	TraesCS1A02G402200	0.780195	0.00275638
KN9204-Specific	chr1A:566163270-566163524	TraesCS1A02G403400	0.804651	0.00159741
KN9204-Specific	chr1A:566185252-566185449	TraesCS1A02G402200	0.742135	0.00571279
KN9204-Specific	chr1A:566185252-566185449	TraesCS1A02G403400	0.683665	0.0142298
KN9204-Specific	chr1A:566185252-566185449	TraesCS1A02G403500	0.591703	0.0426962
KN9204-Specific	chr1A:567020152-567020376	TraesCS1A02G403400	0.809417	0.00142395
KN9204-Specific	chr1A:567688130-567688848	TraesCS1A02G404300	0.591412	0.042824
KN9204-Specific	chr1A:570147914-570148132	TraesCS1A02G408700	0.751245	0.00485323
KN9204-Specific	chr1A:570151588-570151823	TraesCS1A02G408700	0.652321	0.0215009
KN9204-Specific	chr1A:570152673-570153147	TraesCS1A02G407800	0.577577	0.0492219
KN9204-Specific	chr1A:570152673-570153147	TraesCS1A02G407900	0.718988	0.00841154
KN9204-Specific	chr1A:570183396-570183636	TraesCS1A02G407700	0.616668	0.0327017
KN9204-Specific	chr1A:570183396-570183636	TraesCS1A02G407800	0.684422	0.0140806
KN9204-Specific	chr1A:570183396-570183636	TraesCS1A02G407900	0.825024	0.000955225
KN9204-Specific	chr1A:572707199-572707412	TraesCS1A02G412900	0.594406	0.0415213
KN9204-Specific	chr1A:578273445-578273729	TraesCS1A02G422700	0.583	0.046639
KN9204-Specific	chr1A:584069145-584069321	TraesCS1A02G432800	0.577609	0.0492064
KN9204-Specific	chr1A:584069145-584069321	TraesCS1A02G432900	0.641135	0.0246545
KN9204-Specific	chr1A:584824134-584824332	TraesCS1A02G434400	0.706718	0.0101796
KN9204-Specific	chr1A:584838808-584839068	TraesCS1A02G434400	0.713408	0.00918444
KN9204-Specific	chr1A:586624220-586624456	TraesCS1A02G437200	0.609449	0.0353981
KN9204-Specific	chr1A:586627651-586628127	TraesCS1A02G436300	0.803228	0.0016522
KN9204-Specific	chr1A:586627651-586628127	TraesCS1A02G436400	0.849088	0.000475759
KN9204-Specific	chr1A:586627651-586628127	TraesCS1A02G437300	0.630773	0.0278635
KN9204-Specific	chr1A:586629532-586629870	TraesCS1A02G436400	0.595966	0.0408536
KN9204-Specific	chr1A:586629532-586629870	TraesCS1A02G437300	0.623815	0.0301805
KN9204-Specific	chr1B:1787578-1788217	TraesCS1B02G002100	0.846943	0.000508621
KN9204-Specific	chr1B:1787578-1788217	TraesCS1B02G002700	0.621931	0.0308309
KN9204-Specific	chr1B:1799767-1800289	TraesCS1B02G002100	0.953703	1.54956e-06
KN9204-Specific	chr1B:1801380-1801983	TraesCS1B02G002100	0.958425	9.12191e-07
KN9204-Specific	chr1B:1804627-1804760	TraesCS1B02G002100	0.841301	0.000603462
KN9204-Specific	chr1B:1804627-1804760	TraesCS1B02G002700	0.617988	0.0322249
KN9204-Specific	chr1B:1807382-1807544	TraesCS1B02G002100	0.920028	2.2499e-05
KN9204-Specific	chr1B:3972623-3972759	TraesCS1B02G007700	0.649343	0.02231
KN9204-Specific	chr1B:4448113-4448385	TraesCS1B02G007700	0.863767	0.000292691
KN9204-Specific	chr1B:4827182-4827417	TraesCS1B02G008800	0.920751	2.15272e-05
KN9204-Specific	chr1B:4830128-4830662	TraesCS1B02G008800	0.933138	9.40013e-06
KN9204-Specific	chr1B:4831022-4831321	TraesCS1B02G008800	0.914088	3.18643e-05
KN9204-Specific	chr1B:4948977-4949258	TraesCS1B02G008800	0.757433	0.00432778
KN9204-Specific	chr1B:5965366-5965603	TraesCS1B02G011900	0.75944	0.00416699
KN9204-Specific	chr1B:6048535-6048830	TraesCS1B02G011900	0.879087	0.000165586
KN9204-Specific	chr1B:9365888-9366081	TraesCS1B02G020800	0.732826	0.00670476
KN9204-Specific	chr1B:10018710-10018856	TraesCS1B02G022400	0.611936	0.0344517
KN9204-Specific	chr1B:10064476-10064635	TraesCS1B02G022300	0.627686	0.0288749
KN9204-Specific	chr1B:10064476-10064635	TraesCS1B02G022400	0.690768	0.0128739
KN9204-Specific	chr1B:17974330-17974854	TraesCS1B02G038000	0.775232	0.00305423
KN9204-Specific	chr1B:17974330-17974854	TraesCS1B02G038800	0.872781	0.000211166
KN9204-Specific	chr1B:17977247-17977696	TraesCS1B02G038000	0.712079	0.00937609
KN9204-Specific	chr1B:17977247-17977696	TraesCS1B02G038800	0.854012	0.000406563
KN9204-Specific	chr1B:18661600-18661807	TraesCS1B02G038800	0.644937	0.0235475
KN9204-Specific	chr1B:19035344-19035544	TraesCS1B02G039500	0.760374	0.00409374
KN9204-Specific	chr1B:19035344-19035544	TraesCS1B02G039600	0.784429	0.00252022
KN9204-Specific	chr1B:19313568-19313949	TraesCS1B02G039500	0.776672	0.00296545
KN9204-Specific	chr1B:19313568-19313949	TraesCS1B02G039600	0.802815	0.00166835
KN9204-Specific	chr1B:28300587-28300806	TraesCS1B02G048100	0.582891	0.0466901
KN9204-Specific	chr1B:28300949-28301101	TraesCS1B02G048100	0.605796	0.0368216
KN9204-Specific	chr1B:80734671-80734947	TraesCS1B02G087000	0.664076	0.018515
KN9204-Specific	chr1B:249024650-249024866	TraesCS1B02G153200	0.586041	0.0452335
KN9204-Specific	chr1B:284491119-284491293	TraesCS1B02G163200	0.64607	0.0232248
KN9204-Specific	chr1B:284491119-284491293	TraesCS1B02G163300	0.785931	0.00244032
KN9204-Specific	chr1B:284491714-284492031	TraesCS1B02G163200	0.628542	0.0285918
KN9204-Specific	chr1B:284491714-284492031	TraesCS1B02G163300	0.793535	0.00206485
KN9204-Specific	chr1B:305770007-305770252	TraesCS1B02G171700	0.754135	0.00460222
KN9204-Specific	chr1B:329742641-329743333	TraesCS1B02G183000	0.609158	0.03551
KN9204-Specific	chr1B:380675854-380676142	TraesCS1B02G209500	0.603924	0.0375664
KN9204-Specific	chr1B:432216174-432216548	TraesCS1B02G243500	0.638483	0.0254489
KN9204-Specific	chr1B:455982665-455983099	TraesCS1B02G258600	0.816665	0.00118835
KN9204-Specific	chr1B:455983544-455983765	TraesCS1B02G258600	0.834495	0.000735521
KN9204-Specific	chr1B:456138251-456138450	TraesCS1B02G258600	0.849477	0.000469987
KN9204-Specific	chr1B:460370684-460370987	TraesCS1B02G261700	0.660148	0.0194768
KN9204-Specific	chr1B:460561851-460562032	TraesCS1B02G262200	0.793077	0.00208611
KN9204-Specific	chr1B:460625870-460626328	TraesCS1B02G262100	0.596611	0.0405799
KN9204-Specific	chr1B:460625870-460626328	TraesCS1B02G262200	0.872583	0.000212742
KN9204-Specific	chr1B:460626626-460627268	TraesCS1B02G262100	0.600786	0.0388392
KN9204-Specific	chr1B:460626626-460627268	TraesCS1B02G262200	0.933135	9.40168e-06
KN9204-Specific	chr1B:461244954-461245648	TraesCS1B02G262300	0.93479	8.31815e-06
KN9204-Specific	chr1B:461244954-461245648	TraesCS1B02G262400	0.706699	0.0101824
KN9204-Specific	chr1B:461244954-461245648	TraesCS1B02G262500	0.72351	0.0078217
KN9204-Specific	chr1B:490759123-490759390	TraesCS1B02G282500	0.671563	0.0167791
KN9204-Specific	chr1B:503321204-503321482	TraesCS1B02G288900	0.746285	0.00530813
KN9204-Specific	chr1B:503321675-503322015	TraesCS1B02G288900	0.600113	0.0391162
KN9204-Specific	chr1B:503808697-503808997	TraesCS1B02G288900	0.877938	0.00017326
KN9204-Specific	chr1B:503808697-503808997	TraesCS1B02G289000	0.885702	0.000126435
KN9204-Specific	chr1B:503808697-503808997	TraesCS1B02G289100	0.933542	9.12598e-06
KN9204-Specific	chr1B:508378885-508379060	TraesCS1B02G290800	0.652426	0.0214729
KN9204-Specific	chr1B:510307412-510308243	TraesCS1B02G292400	0.876476	0.000183417
KN9204-Specific	chr1B:510308631-510308858	TraesCS1B02G292400	0.846475	0.000516008
KN9204-Specific	chr1B:510309079-510309467	TraesCS1B02G292400	0.899804	6.70738e-05
KN9204-Specific	chr1B:510309079-510309467	TraesCS1B02G292900	0.634072	0.0268109
KN9204-Specific	chr1B:517808112-517808916	TraesCS1B02G297700	0.594042	0.0416783
KN9204-Specific	chr1B:518717205-518718186	TraesCS1B02G298300	0.910513	3.88292e-05
KN9204-Specific	chr1B:518868379-518868563	TraesCS1B02G298300	0.839228	0.000641566
KN9204-Specific	chr1B:518870602-518870896	TraesCS1B02G298300	0.917853	2.56336e-05
KN9204-Specific	chr1B:518871264-518871557	TraesCS1B02G298300	0.843855	0.000558968
KN9204-Specific	chr1B:518874823-518875344	TraesCS1B02G298300	0.830317	0.000826979
KN9204-Specific	chr1B:518878851-518879255	TraesCS1B02G298300	0.83036	0.000826012
KN9204-Specific	chr1B:518882121-518882546	TraesCS1B02G298300	0.853688	0.000410859
KN9204-Specific	chr1B:518908840-518909571	TraesCS1B02G298300	0.737339	0.006209
KN9204-Specific	chr1B:518914706-518914922	TraesCS1B02G298300	0.787063	0.00238133
KN9204-Specific	chr1B:519234918-519235212	TraesCS1B02G298300	0.878571	0.000169001
KN9204-Specific	chr1B:519234918-519235212	TraesCS1B02G298400	0.864765	0.000282627
KN9204-Specific	chr1B:520096591-520096916	TraesCS1B02G298400	0.896989	7.66663e-05
KN9204-Specific	chr1B:520114944-520115284	TraesCS1B02G298400	0.889612	0.000106963
KN9204-Specific	chr1B:520114944-520115284	TraesCS1B02G298800	0.630886	0.0278267
KN9204-Specific	chr1B:520281131-520281410	TraesCS1B02G299300	0.690094	0.0129983
KN9204-Specific	chr1B:520281131-520281410	TraesCS1B02G299700	0.691402	0.0127576
KN9204-Specific	chr1B:520281131-520281410	TraesCS1B02G299800	0.749954	0.00496872
KN9204-Specific	chr1B:524539297-524539437	TraesCS1B02G303200	0.581743	0.0472291
KN9204-Specific	chr1B:534656836-534657033	TraesCS1B02G311000	0.651914	0.0216103
KN9204-Specific	chr1B:543165503-543166110	TraesCS1B02G319100	0.783359	0.0025784
KN9204-Specific	chr1B:543514881-543515168	TraesCS1B02G319100	0.647562	0.0228043
KN9204-Specific	chr1B:543516321-543516837	TraesCS1B02G319100	0.757596	0.0043146
KN9204-Specific	chr1B:543536532-543536881	TraesCS1B02G319100	0.673518	0.0163461
KN9204-Specific	chr1B:543536532-543536881	TraesCS1B02G319800	0.604148	0.0374766
KN9204-Specific	chr1B:543539095-543539640	TraesCS1B02G319100	0.71178	0.00941957
KN9204-Specific	chr1B:543539095-543539640	TraesCS1B02G319800	0.591245	0.0428977
KN9204-Specific	chr1B:543544648-543545036	TraesCS1B02G319100	0.776088	0.00300121
KN9204-Specific	chr1B:543544648-543545036	TraesCS1B02G319800	0.599335	0.039438
KN9204-Specific	chr1B:543556818-543558081	TraesCS1B02G319100	0.590939	0.0430326
KN9204-Specific	chr1B:550828564-550829261	TraesCS1B02G325300	0.78194	0.00265711
KN9204-Specific	chr1B:555181988-555182371	TraesCS1B02G329100	0.576666	0.0496655
KN9204-Specific	chr1B:565898079-565898531	TraesCS1B02G338200	0.715178	0.0089337
KN9204-Specific	chr1B:566149777-566149933	TraesCS1B02G338200	0.611199	0.0347303
KN9204-Specific	chr1B:566151028-566151186	TraesCS1B02G338200	0.702778	0.0108019
KN9204-Specific	chr1B:566151028-566151186	TraesCS1B02G338400	0.685943	0.0137841
KN9204-Specific	chr1B:566256895-566257172	TraesCS1B02G338000	0.688967	0.0132082
KN9204-Specific	chr1B:566256895-566257172	TraesCS1B02G338200	0.693454	0.012387
KN9204-Specific	chr1B:566256895-566257172	TraesCS1B02G338400	0.600935	0.0387783
KN9204-Specific	chr1B:566256895-566257172	TraesCS1B02G338800	0.632666	0.0272558
KN9204-Specific	chr1B:566456319-566456521	TraesCS1B02G338200	0.581216	0.047478
KN9204-Specific	chr1B:566456319-566456521	TraesCS1B02G338800	0.700585	0.0111603
KN9204-Specific	chr1B:566460137-566460321	TraesCS1B02G338800	0.62252	0.0306265
KN9204-Specific	chr1B:566694585-566694713	TraesCS1B02G338200	0.715654	0.00886716
KN9204-Specific	chr1B:566694585-566694713	TraesCS1B02G338400	0.722133	0.00799797
KN9204-Specific	chr1B:566694585-566694713	TraesCS1B02G338800	0.633679	0.0269348
KN9204-Specific	chr1B:566974596-566974813	TraesCS1B02G338800	0.663834	0.0185732
KN9204-Specific	chr1B:567361344-567361613	TraesCS1B02G339900	0.756094	0.00443769
KN9204-Specific	chr1B:567365529-567366191	TraesCS1B02G339900	0.86529	0.000277437
KN9204-Specific	chr1B:567443787-567444870	TraesCS1B02G339900	0.888373	0.000112857
KN9204-Specific	chr1B:567445025-567445161	TraesCS1B02G339900	0.645748	0.0233161
KN9204-Specific	chr1B:567445772-567445884	TraesCS1B02G339900	0.829735	0.000840406
KN9204-Specific	chr1B:567465132-567466236	TraesCS1B02G339900	0.906532	4.79382e-05
KN9204-Specific	chr1B:567468985-567469242	TraesCS1B02G339900	0.885114	0.000129585
KN9204-Specific	chr1B:567681890-567682055	TraesCS1B02G339900	0.8623	0.000307999
KN9204-Specific	chr1B:567683947-567684786	TraesCS1B02G339900	0.920587	2.17441e-05
KN9204-Specific	chr1B:567684904-567685572	TraesCS1B02G339900	0.712359	0.00933536
KN9204-Specific	chr1B:567711273-567711799	TraesCS1B02G339900	0.916945	2.70399e-05
KN9204-Specific	chr1B:567720806-567721519	TraesCS1B02G339900	0.931562	1.05328e-05
KN9204-Specific	chr1B:567723354-567723720	TraesCS1B02G339900	0.774353	0.00310947
KN9204-Specific	chr1B:567730835-567731226	TraesCS1B02G339900	0.687265	0.0135302
KN9204-Specific	chr1B:567734918-567735315	TraesCS1B02G339900	0.804096	0.00161858
KN9204-Specific	chr1B:567735838-567736212	TraesCS1B02G339900	0.787175	0.00237555
KN9204-Specific	chr1B:567738851-567739034	TraesCS1B02G339900	0.801217	0.00173207
KN9204-Specific	chr1B:567755055-567755394	TraesCS1B02G339900	0.708765	0.00986683
KN9204-Specific	chr1B:567756293-567756547	TraesCS1B02G339900	0.746595	0.00527877
KN9204-Specific	chr1B:567760972-567761534	TraesCS1B02G339900	0.930949	1.10012e-05
KN9204-Specific	chr1B:567763983-567764188	TraesCS1B02G339900	0.881112	0.000152718
KN9204-Specific	chr1B:567965273-567966258	TraesCS1B02G339900	0.702274	0.0108834
KN9204-Specific	chr1B:568695229-568695590	TraesCS1B02G341000	0.845624	0.000529677
KN9204-Specific	chr1B:568698157-568698626	TraesCS1B02G341000	0.820285	0.00108258
KN9204-Specific	chr1B:569788504-569789014	TraesCS1B02G341400	0.795769	0.0019634
KN9204-Specific	chr1B:569788504-569789014	TraesCS1B02G341500	0.727627	0.00731214
KN9204-Specific	chr1B:569789844-569790286	TraesCS1B02G341400	0.77342	0.00316888
KN9204-Specific	chr1B:569789844-569790286	TraesCS1B02G341500	0.702179	0.0108988
KN9204-Specific	chr1B:569790886-569791060	TraesCS1B02G341400	0.763657	0.00384395
KN9204-Specific	chr1B:569790886-569791060	TraesCS1B02G341500	0.715825	0.00884346
KN9204-Specific	chr1B:569791698-569792222	TraesCS1B02G341400	0.726428	0.00745798
KN9204-Specific	chr1B:569791698-569792222	TraesCS1B02G341500	0.705235	0.0104106
KN9204-Specific	chr1B:571830593-571830831	TraesCS1B02G343700	0.756844	0.00437586
KN9204-Specific	chr1B:571918781-571919032	TraesCS1B02G343700	0.807543	0.00149032
KN9204-Specific	chr1B:571918781-571919032	TraesCS1B02G343800	0.762931	0.00389812
KN9204-Specific	chr1B:571978836-571979258	TraesCS1B02G343700	0.613919	0.0337103
KN9204-Specific	chr1B:572070087-572070417	TraesCS1B02G343700	0.59995	0.0391835
KN9204-Specific	chr1B:572113758-572114080	TraesCS1B02G343700	0.636765	0.0259734
KN9204-Specific	chr1B:572258824-572259225	TraesCS1B02G343700	0.808588	0.00145304
KN9204-Specific	chr1B:572258824-572259225	TraesCS1B02G343800	0.616526	0.0327534
KN9204-Specific	chr1B:572259651-572259952	TraesCS1B02G343700	0.814864	0.00124388
KN9204-Specific	chr1B:572259651-572259952	TraesCS1B02G343800	0.780538	0.00273668
KN9204-Specific	chr1B:572267651-572268032	TraesCS1B02G343700	0.819333	0.00110965
KN9204-Specific	chr1B:572267651-572268032	TraesCS1B02G343800	0.66832	0.0175156
KN9204-Specific	chr1B:572269174-572269305	TraesCS1B02G343700	0.798828	0.00183079
KN9204-Specific	chr1B:572269174-572269305	TraesCS1B02G343800	0.671345	0.0168279
KN9204-Specific	chr1B:572279018-572280239	TraesCS1B02G343700	0.898161	7.25501e-05
KN9204-Specific	chr1B:572279018-572280239	TraesCS1B02G343800	0.819234	0.00111251
KN9204-Specific	chr1B:573330749-573330861	TraesCS1B02G345200	0.692231	0.0126068
KN9204-Specific	chr1B:573331915-573332045	TraesCS1B02G345200	0.706701	0.0101821
KN9204-Specific	chr1B:573750173-573750492	TraesCS1B02G345200	0.741276	0.00579944
KN9204-Specific	chr1B:583987253-583987740	TraesCS1B02G354000	0.644028	0.0238089
KN9204-Specific	chr1B:586810769-586810960	TraesCS1B02G357300	0.695824	0.0119687
KN9204-Specific	chr1B:586811098-586811210	TraesCS1B02G357300	0.683908	0.0141818
KN9204-Specific	chr1B:586815188-586815550	TraesCS1B02G357300	0.838997	0.000645923
KN9204-Specific	chr1B:586816570-586816714	TraesCS1B02G357300	0.762053	0.0039645
KN9204-Specific	chr1B:586816789-586817385	TraesCS1B02G357300	0.956018	1.20365e-06
KN9204-Specific	chr1B:586981333-586981532	TraesCS1B02G357300	0.882028	0.000147156
KN9204-Specific	chr1B:587055867-587056137	TraesCS1B02G357300	0.779956	0.00277019
KN9204-Specific	chr1B:587055867-587056137	TraesCS1B02G357700	0.907171	4.63738e-05
KN9204-Specific	chr1B:587056823-587057264	TraesCS1B02G357300	0.765888	0.00368086
KN9204-Specific	chr1B:587056823-587057264	TraesCS1B02G357700	0.7311	0.00690207
KN9204-Specific	chr1B:587073927-587074147	TraesCS1B02G357300	0.832046	0.000788118
KN9204-Specific	chr1B:587073927-587074147	TraesCS1B02G357700	0.940517	5.30482e-06
KN9204-Specific	chr1B:587077912-587078172	TraesCS1B02G357300	0.654815	0.02084
KN9204-Specific	chr1B:587077912-587078172	TraesCS1B02G357700	0.634505	0.0266748
KN9204-Specific	chr1B:587079833-587079951	TraesCS1B02G357300	0.802289	0.00168913
KN9204-Specific	chr1B:587079833-587079951	TraesCS1B02G357700	0.745683	0.00536543
KN9204-Specific	chr1B:587435221-587435459	TraesCS1B02G357300	0.848577	0.00048343
KN9204-Specific	chr1B:587435221-587435459	TraesCS1B02G357700	0.906577	4.78269e-05
KN9204-Specific	chr1B:587435221-587435459	TraesCS1B02G358100	0.708878	0.00984985
KN9204-Specific	chr1B:587663426-587663585	TraesCS1B02G357300	0.893418	9.03491e-05
KN9204-Specific	chr1B:587663426-587663585	TraesCS1B02G357700	0.870637	0.000228716
KN9204-Specific	chr1B:587663426-587663585	TraesCS1B02G358100	0.597292	0.0402925
KN9204-Specific	chr1B:587665392-587665909	TraesCS1B02G357300	0.761053	0.00404107
KN9204-Specific	chr1B:587665392-587665909	TraesCS1B02G357700	0.762186	0.00395439
KN9204-Specific	chr1B:587665971-587666111	TraesCS1B02G357300	0.690281	0.0129637
KN9204-Specific	chr1B:587665971-587666111	TraesCS1B02G357700	0.666551	0.0179273
KN9204-Specific	chr1B:587670106-587671138	TraesCS1B02G357300	0.744378	0.00549128
KN9204-Specific	chr1B:587670106-587671138	TraesCS1B02G357700	0.644827	0.023579
KN9204-Specific	chr1B:613259130-613260000	TraesCS1B02G380500	0.749143	0.00504229
KN9204-Specific	chr1B:613260649-613260946	TraesCS1B02G380500	0.735081	0.0064535
KN9204-Specific	chr1B:613261441-613261625	TraesCS1B02G380500	0.606826	0.0364159
KN9204-Specific	chr1B:621591779-621592191	TraesCS1B02G387300	0.604264	0.0374305
KN9204-Specific	chr1B:623348119-623348310	TraesCS1B02G389500	0.638544	0.0254306
KN9204-Specific	chr1B:623348119-623348310	TraesCS1B02G389800	0.661556	0.019128
KN9204-Specific	chr1B:623348119-623348310	TraesCS1B02G390000	0.727426	0.00733652
KN9204-Specific	chr1B:623348119-623348310	TraesCS1B02G390100	0.632625	0.0272691
KN9204-Specific	chr1B:623350304-623350545	TraesCS1B02G390000	0.621024	0.0311477
KN9204-Specific	chr1B:623350304-623350545	TraesCS1B02G390100	0.583919	0.0462113
KN9204-Specific	chr1B:623350304-623350545	TraesCS1B02G390200	0.637414	0.0257742
KN9204-Specific	chr1B:623350956-623351079	TraesCS1B02G390000	0.647159	0.0229174
KN9204-Specific	chr1B:623351753-623351889	TraesCS1B02G390000	0.661293	0.0191927
KN9204-Specific	chr1B:623351753-623351889	TraesCS1B02G390100	0.713805	0.00912778
KN9204-Specific	chr1B:623364024-623364239	TraesCS1B02G389800	0.631221	0.0277186
KN9204-Specific	chr1B:623364024-623364239	TraesCS1B02G390000	0.678839	0.0152094
KN9204-Specific	chr1B:623364024-623364239	TraesCS1B02G390100	0.753844	0.00462704
KN9204-Specific	chr1B:623364646-623364829	TraesCS1B02G389800	0.583429	0.046439
KN9204-Specific	chr1B:623364646-623364829	TraesCS1B02G390000	0.703804	0.0106371
KN9204-Specific	chr1B:623364646-623364829	TraesCS1B02G390100	0.669666	0.017207
KN9204-Specific	chr1B:623367036-623367353	TraesCS1B02G389500	0.791614	0.00215517
KN9204-Specific	chr1B:623367036-623367353	TraesCS1B02G389800	0.830036	0.000833434
KN9204-Specific	chr1B:623367036-623367353	TraesCS1B02G390000	0.68643	0.01369
KN9204-Specific	chr1B:623367036-623367353	TraesCS1B02G390100	0.863878	0.000291563
KN9204-Specific	chr1B:623367036-623367353	TraesCS1B02G390200	0.748906	0.00506391
KN9204-Specific	chr1B:623385981-623386397	TraesCS1B02G389800	0.576594	0.0497009
KN9204-Specific	chr1B:623385981-623386397	TraesCS1B02G390000	0.599568	0.0393414
KN9204-Specific	chr1B:623385981-623386397	TraesCS1B02G390100	0.687233	0.0135362
KN9204-Specific	chr1B:623390558-623390729	TraesCS1B02G389800	0.770871	0.00333565
KN9204-Specific	chr1B:623390558-623390729	TraesCS1B02G390000	0.667017	0.017818
KN9204-Specific	chr1B:623390558-623390729	TraesCS1B02G390100	0.795129	0.00199206
KN9204-Specific	chr1B:623391166-623391329	TraesCS1B02G389500	0.668308	0.0175184
KN9204-Specific	chr1B:623391166-623391329	TraesCS1B02G389800	0.665188	0.0182493
KN9204-Specific	chr1B:623391166-623391329	TraesCS1B02G390000	0.753321	0.00467191
KN9204-Specific	chr1B:623391166-623391329	TraesCS1B02G390100	0.63808	0.0255711
KN9204-Specific	chr1B:623391166-623391329	TraesCS1B02G390200	0.607424	0.0361821
KN9204-Specific	chr1B:623391673-623391845	TraesCS1B02G389600	0.636233	0.0261372
KN9204-Specific	chr1B:623391673-623391845	TraesCS1B02G390000	0.76024	0.00410419
KN9204-Specific	chr1B:623402681-623402812	TraesCS1B02G389500	0.63078	0.027861
KN9204-Specific	chr1B:623402681-623402812	TraesCS1B02G389800	0.701081	0.0110785
KN9204-Specific	chr1B:623402681-623402812	TraesCS1B02G390000	0.732742	0.00671427
KN9204-Specific	chr1B:623402681-623402812	TraesCS1B02G390100	0.638989	0.0252961
KN9204-Specific	chr1B:623403761-623404406	TraesCS1B02G389600	0.665229	0.0182394
KN9204-Specific	chr1B:623403761-623404406	TraesCS1B02G390000	0.654709	0.0208678
KN9204-Specific	chr1B:623403761-623404406	TraesCS1B02G390100	0.607679	0.0360827
KN9204-Specific	chr1B:623448904-623449016	TraesCS1B02G389500	0.646885	0.0229944
KN9204-Specific	chr1B:623448904-623449016	TraesCS1B02G389600	0.658484	0.0198949
KN9204-Specific	chr1B:623448904-623449016	TraesCS1B02G390000	0.84224	0.000586799
KN9204-Specific	chr1B:623448904-623449016	TraesCS1B02G390200	0.584135	0.046111
KN9204-Specific	chr1B:623451978-623452515	TraesCS1B02G389600	0.760987	0.00404618
KN9204-Specific	chr1B:623451978-623452515	TraesCS1B02G390000	0.894453	8.61996e-05
KN9204-Specific	chr1B:623452990-623453108	TraesCS1B02G389600	0.728821	0.00716923
KN9204-Specific	chr1B:623452990-623453108	TraesCS1B02G390000	0.817214	0.00117181
KN9204-Specific	chr1B:623452990-623453108	TraesCS1B02G390100	0.599354	0.0394303
KN9204-Specific	chr1B:623454570-623454849	TraesCS1B02G389800	0.706017	0.0102882
KN9204-Specific	chr1B:623454570-623454849	TraesCS1B02G390000	0.746342	0.00530275
KN9204-Specific	chr1B:623454570-623454849	TraesCS1B02G390100	0.715867	0.0088376
KN9204-Specific	chr1B:623455850-623456273	TraesCS1B02G389800	0.777532	0.00291333
KN9204-Specific	chr1B:623455850-623456273	TraesCS1B02G390000	0.599196	0.0394957
KN9204-Specific	chr1B:623455850-623456273	TraesCS1B02G390100	0.791098	0.00217999
KN9204-Specific	chr1B:623459276-623459425	TraesCS1B02G389500	0.648428	0.0225631
KN9204-Specific	chr1B:623459276-623459425	TraesCS1B02G390000	0.654458	0.0209339
KN9204-Specific	chr1B:623459276-623459425	TraesCS1B02G390100	0.640482	0.0248486
KN9204-Specific	chr1B:623459276-623459425	TraesCS1B02G390200	0.71981	0.00830187
KN9204-Specific	chr1B:623459276-623459425	TraesCS1B02G390300	0.679668	0.0150378
KN9204-Specific	chr1B:623500137-623500848	TraesCS1B02G389500	0.583016	0.0466317
KN9204-Specific	chr1B:623500137-623500848	TraesCS1B02G389600	0.619069	0.0318385
KN9204-Specific	chr1B:623500137-623500848	TraesCS1B02G389800	0.592861	0.0421899
KN9204-Specific	chr1B:623500137-623500848	TraesCS1B02G390000	0.824749	0.000962273
KN9204-Specific	chr1B:623500137-623500848	TraesCS1B02G390100	0.641542	0.0245342
KN9204-Specific	chr1B:623539138-623539454	TraesCS1B02G389500	0.624688	0.0298825
KN9204-Specific	chr1B:623539138-623539454	TraesCS1B02G389800	0.656252	0.0204662
KN9204-Specific	chr1B:623539138-623539454	TraesCS1B02G390000	0.763386	0.00386409
KN9204-Specific	chr1B:623539138-623539454	TraesCS1B02G390100	0.721254	0.00811201
KN9204-Specific	chr1B:623539138-623539454	TraesCS1B02G390200	0.586622	0.0449682
KN9204-Specific	chr1B:623540652-623540858	TraesCS1B02G389500	0.671266	0.0168456
KN9204-Specific	chr1B:623540652-623540858	TraesCS1B02G389800	0.638402	0.0254735
KN9204-Specific	chr1B:623540652-623540858	TraesCS1B02G390000	0.781086	0.00270534
KN9204-Specific	chr1B:623540652-623540858	TraesCS1B02G390100	0.646156	0.0232004
KN9204-Specific	chr1B:623540652-623540858	TraesCS1B02G390200	0.630935	0.0278108
KN9204-Specific	chr1B:623542196-623542767	TraesCS1B02G389800	0.762485	0.00393171
KN9204-Specific	chr1B:623542196-623542767	TraesCS1B02G390000	0.630277	0.0280241
KN9204-Specific	chr1B:623542196-623542767	TraesCS1B02G390100	0.83405	0.00074487
KN9204-Specific	chr1B:623543005-623543281	TraesCS1B02G389800	0.746401	0.00529716
KN9204-Specific	chr1B:623543005-623543281	TraesCS1B02G390000	0.675659	0.0158816
KN9204-Specific	chr1B:623543005-623543281	TraesCS1B02G390100	0.834302	0.000739564
KN9204-Specific	chr1B:623544284-623544451	TraesCS1B02G389600	0.631358	0.0276746
KN9204-Specific	chr1B:623544284-623544451	TraesCS1B02G390000	0.794937	0.00200072
KN9204-Specific	chr1B:623552514-623552739	TraesCS1B02G389600	0.865278	0.000277551
KN9204-Specific	chr1B:623552514-623552739	TraesCS1B02G390000	0.799774	0.00179122
KN9204-Specific	chr1B:623553077-623553669	TraesCS1B02G389600	0.639478	0.0251489
KN9204-Specific	chr1B:623553077-623553669	TraesCS1B02G389800	0.605255	0.0370355
KN9204-Specific	chr1B:623553077-623553669	TraesCS1B02G390000	0.725498	0.00757241
KN9204-Specific	chr1B:623553077-623553669	TraesCS1B02G390100	0.695904	0.0119547
KN9204-Specific	chr1B:623628161-623629088	TraesCS1B02G389600	0.675215	0.0159771
KN9204-Specific	chr1B:623628161-623629088	TraesCS1B02G390000	0.670982	0.0169092
KN9204-Specific	chr1B:623628161-623629088	TraesCS1B02G390100	0.623529	0.0302787
KN9204-Specific	chr1B:623704690-623705015	TraesCS1B02G389500	0.677841	0.015418
KN9204-Specific	chr1B:623704690-623705015	TraesCS1B02G389800	0.725893	0.00752369
KN9204-Specific	chr1B:623704690-623705015	TraesCS1B02G390000	0.705132	0.0104266
KN9204-Specific	chr1B:623704690-623705015	TraesCS1B02G390100	0.760273	0.00410161
KN9204-Specific	chr1B:623704690-623705015	TraesCS1B02G390200	0.630307	0.0280144
KN9204-Specific	chr1B:623710818-623711182	TraesCS1B02G389500	0.829573	0.000844167
KN9204-Specific	chr1B:623710818-623711182	TraesCS1B02G389800	0.831316	0.00080436
KN9204-Specific	chr1B:623710818-623711182	TraesCS1B02G390000	0.712237	0.00935304
KN9204-Specific	chr1B:623710818-623711182	TraesCS1B02G390100	0.74814	0.0051344
KN9204-Specific	chr1B:623710818-623711182	TraesCS1B02G390200	0.739515	0.00597995
KN9204-Specific	chr1B:623710818-623711182	TraesCS1B02G390300	0.656324	0.0204475
KN9204-Specific	chr1B:623710818-623711182	TraesCS1B02G390600	0.747369	0.00520611
KN9204-Specific	chr1B:623710818-623711182	TraesCS1B02G390700	0.577869	0.0490803
KN9204-Specific	chr1B:623712206-623712449	TraesCS1B02G389500	0.724216	0.00773246
KN9204-Specific	chr1B:623712206-623712449	TraesCS1B02G390000	0.777129	0.00293763
KN9204-Specific	chr1B:623712206-623712449	TraesCS1B02G390200	0.709327	0.0097824
KN9204-Specific	chr1B:623712206-623712449	TraesCS1B02G390300	0.699242	0.011384
KN9204-Specific	chr1B:623712206-623712449	TraesCS1B02G390600	0.799253	0.00181293
KN9204-Specific	chr1B:623712206-623712449	TraesCS1B02G390700	0.824199	0.000976517
KN9204-Specific	chr1B:623712206-623712449	TraesCS1B02G390900	0.764767	0.00376209
KN9204-Specific	chr1B:623713268-623713524	TraesCS1B02G389500	0.851138	0.000445928
KN9204-Specific	chr1B:623713268-623713524	TraesCS1B02G389600	0.582188	0.0470196
KN9204-Specific	chr1B:623713268-623713524	TraesCS1B02G389800	0.610584	0.0349638
KN9204-Specific	chr1B:623713268-623713524	TraesCS1B02G390000	0.813308	0.0012934
KN9204-Specific	chr1B:623713268-623713524	TraesCS1B02G390200	0.827463	0.000894349
KN9204-Specific	chr1B:623713268-623713524	TraesCS1B02G390300	0.765691	0.00369502
KN9204-Specific	chr1B:623713268-623713524	TraesCS1B02G390600	0.766514	0.00363605
KN9204-Specific	chr1B:623713268-623713524	TraesCS1B02G390700	0.655303	0.0207127
KN9204-Specific	chr1B:623719666-623719971	TraesCS1B02G389500	0.940015	5.52754e-06
KN9204-Specific	chr1B:623719666-623719971	TraesCS1B02G389800	0.799475	0.00180365
KN9204-Specific	chr1B:623719666-623719971	TraesCS1B02G390000	0.694568	0.012189
KN9204-Specific	chr1B:623719666-623719971	TraesCS1B02G390100	0.701691	0.0109784
KN9204-Specific	chr1B:623719666-623719971	TraesCS1B02G390200	0.88566	0.000126656
KN9204-Specific	chr1B:623719666-623719971	TraesCS1B02G390300	0.816847	0.00118285
KN9204-Specific	chr1B:623719666-623719971	TraesCS1B02G390600	0.830069	0.000832672
KN9204-Specific	chr1B:623719666-623719971	TraesCS1B02G390700	0.692124	0.0126263
KN9204-Specific	chr1B:623734313-623734960	TraesCS1B02G389500	0.646965	0.0229718
KN9204-Specific	chr1B:623734313-623734960	TraesCS1B02G389800	0.861608	0.000315437
KN9204-Specific	chr1B:623734313-623734960	TraesCS1B02G390000	0.609708	0.0352986
KN9204-Specific	chr1B:623734313-623734960	TraesCS1B02G390100	0.86852	0.000247127
KN9204-Specific	chr1B:623738480-623738860	TraesCS1B02G389500	0.720202	0.00825001
KN9204-Specific	chr1B:623738480-623738860	TraesCS1B02G389800	0.874545	0.000197539
KN9204-Specific	chr1B:623738480-623738860	TraesCS1B02G390000	0.616516	0.0327568
KN9204-Specific	chr1B:623738480-623738860	TraesCS1B02G390100	0.731424	0.00686465
KN9204-Specific	chr1B:623738480-623738860	TraesCS1B02G390600	0.684969	0.0139733
KN9204-Specific	chr1B:623759778-623759987	TraesCS1B02G389800	0.775609	0.00303081
KN9204-Specific	chr1B:623759778-623759987	TraesCS1B02G390100	0.774408	0.00310596
KN9204-Specific	chr1B:623760126-623760448	TraesCS1B02G389500	0.73728	0.00621523
KN9204-Specific	chr1B:623760126-623760448	TraesCS1B02G389800	0.864461	0.000285664
KN9204-Specific	chr1B:623760126-623760448	TraesCS1B02G390000	0.599834	0.0392314
KN9204-Specific	chr1B:623760126-623760448	TraesCS1B02G390100	0.797375	0.00189291
KN9204-Specific	chr1B:623760126-623760448	TraesCS1B02G390200	0.635088	0.0264927
KN9204-Specific	chr1B:623760126-623760448	TraesCS1B02G390600	0.653297	0.0212406
KN9204-Specific	chr1B:623815961-623817044	TraesCS1B02G389500	0.640737	0.0247727
KN9204-Specific	chr1B:623815961-623817044	TraesCS1B02G389800	0.773297	0.00317683
KN9204-Specific	chr1B:623815961-623817044	TraesCS1B02G390000	0.722455	0.00795644
KN9204-Specific	chr1B:623815961-623817044	TraesCS1B02G390100	0.788294	0.00231844
KN9204-Specific	chr1B:623819667-623819854	TraesCS1B02G389500	0.772997	0.00319612
KN9204-Specific	chr1B:623819667-623819854	TraesCS1B02G390000	0.781887	0.00266006
KN9204-Specific	chr1B:623819667-623819854	TraesCS1B02G390100	0.596836	0.0404847
KN9204-Specific	chr1B:623819667-623819854	TraesCS1B02G390200	0.79099	0.0021852
KN9204-Specific	chr1B:623819667-623819854	TraesCS1B02G390300	0.744368	0.00549224
KN9204-Specific	chr1B:623822475-623822940	TraesCS1B02G389500	0.683152	0.0143317
KN9204-Specific	chr1B:623822475-623822940	TraesCS1B02G389800	0.779076	0.00282151
KN9204-Specific	chr1B:623822475-623822940	TraesCS1B02G390000	0.579598	0.048248
KN9204-Specific	chr1B:623822475-623822940	TraesCS1B02G390100	0.857512	0.000362341
KN9204-Specific	chr1B:623822475-623822940	TraesCS1B02G390200	0.659814	0.0195601
KN9204-Specific	chr1B:623822475-623822940	TraesCS1B02G390300	0.608962	0.0355856
KN9204-Specific	chr1B:623823181-623823312	TraesCS1B02G389500	0.747835	0.00516266
KN9204-Specific	chr1B:623823181-623823312	TraesCS1B02G389800	0.717365	0.00863116
KN9204-Specific	chr1B:623823181-623823312	TraesCS1B02G390000	0.716864	0.00869972
KN9204-Specific	chr1B:623823181-623823312	TraesCS1B02G390100	0.662118	0.0189899
KN9204-Specific	chr1B:623823181-623823312	TraesCS1B02G390200	0.68333	0.0142964
KN9204-Specific	chr1B:623823181-623823312	TraesCS1B02G390300	0.604425	0.037366
KN9204-Specific	chr1B:623823181-623823312	TraesCS1B02G390600	0.662352	0.0189328
KN9204-Specific	chr1B:623849009-623849196	TraesCS1B02G389500	0.598314	0.0398632
KN9204-Specific	chr1B:623849009-623849196	TraesCS1B02G389800	0.599955	0.0391816
KN9204-Specific	chr1B:623849009-623849196	TraesCS1B02G390000	0.744427	0.00548658
KN9204-Specific	chr1B:623855708-623856311	TraesCS1B02G389800	0.692601	0.01254
KN9204-Specific	chr1B:623855708-623856311	TraesCS1B02G390000	0.655473	0.0206683
KN9204-Specific	chr1B:623855708-623856311	TraesCS1B02G390100	0.818289	0.00113995
KN9204-Specific	chr1B:623870870-623871093	TraesCS1B02G389500	0.601694	0.0384678
KN9204-Specific	chr1B:623870870-623871093	TraesCS1B02G389800	0.837282	0.000678993
KN9204-Specific	chr1B:623870870-623871093	TraesCS1B02G390100	0.774893	0.00307549
KN9204-Specific	chr1B:623871119-623871643	TraesCS1B02G389600	0.587946	0.0443684
KN9204-Specific	chr1B:623871119-623871643	TraesCS1B02G390000	0.752436	0.00474855
KN9204-Specific	chr1B:623871119-623871643	TraesCS1B02G390100	0.609128	0.0355217
KN9204-Specific	chr1B:623872108-623872303	TraesCS1B02G389800	0.708838	0.00985582
KN9204-Specific	chr1B:623872108-623872303	TraesCS1B02G390100	0.746262	0.00531029
KN9204-Specific	chr1B:623873714-623873972	TraesCS1B02G389500	0.591672	0.0427099
KN9204-Specific	chr1B:623873714-623873972	TraesCS1B02G389800	0.748697	0.00508312
KN9204-Specific	chr1B:623873714-623873972	TraesCS1B02G390000	0.659433	0.0196556
KN9204-Specific	chr1B:623873714-623873972	TraesCS1B02G390100	0.817556	0.00116161
KN9204-Specific	chr1B:623879436-623879691	TraesCS1B02G389500	0.806318	0.001535
KN9204-Specific	chr1B:623879436-623879691	TraesCS1B02G389800	0.829064	0.000856064
KN9204-Specific	chr1B:623879436-623879691	TraesCS1B02G390000	0.604227	0.0374452
KN9204-Specific	chr1B:623879436-623879691	TraesCS1B02G390100	0.653573	0.0211672
KN9204-Specific	chr1B:623879436-623879691	TraesCS1B02G390200	0.683557	0.0142512
KN9204-Specific	chr1B:623879436-623879691	TraesCS1B02G390300	0.601393	0.0385906
KN9204-Specific	chr1B:623879436-623879691	TraesCS1B02G390600	0.7941	0.00203879
KN9204-Specific	chr1B:623879436-623879691	TraesCS1B02G390700	0.618034	0.0322084
KN9204-Specific	chr1B:623881257-623881544	TraesCS1B02G389800	0.742459	0.0056804
KN9204-Specific	chr1B:623881257-623881544	TraesCS1B02G390000	0.598846	0.0396413
KN9204-Specific	chr1B:623881257-623881544	TraesCS1B02G390100	0.791067	0.00218147
KN9204-Specific	chr1B:623884054-623884700	TraesCS1B02G389500	0.814316	0.00126116
KN9204-Specific	chr1B:623884054-623884700	TraesCS1B02G389800	0.80832	0.00146253
KN9204-Specific	chr1B:623884054-623884700	TraesCS1B02G390000	0.701568	0.0109985
KN9204-Specific	chr1B:623884054-623884700	TraesCS1B02G390100	0.740575	0.00587075
KN9204-Specific	chr1B:623884054-623884700	TraesCS1B02G390200	0.73118	0.00689283
KN9204-Specific	chr1B:623884054-623884700	TraesCS1B02G390300	0.651643	0.0216835
KN9204-Specific	chr1B:623884054-623884700	TraesCS1B02G390600	0.708653	0.00988381
KN9204-Specific	chr1B:623885492-623885640	TraesCS1B02G389500	0.770372	0.00336907
KN9204-Specific	chr1B:623885492-623885640	TraesCS1B02G389800	0.694903	0.01213
KN9204-Specific	chr1B:623885492-623885640	TraesCS1B02G390000	0.691899	0.0126671
KN9204-Specific	chr1B:623885492-623885640	TraesCS1B02G390100	0.699423	0.0113537
KN9204-Specific	chr1B:623885492-623885640	TraesCS1B02G390200	0.757673	0.00430835
KN9204-Specific	chr1B:623885492-623885640	TraesCS1B02G390300	0.742251	0.0057012
KN9204-Specific	chr1B:623885492-623885640	TraesCS1B02G390600	0.657872	0.0200503
KN9204-Specific	chr1B:623885492-623885640	TraesCS1B02G390700	0.596606	0.0405822
KN9204-Specific	chr1B:623896467-623896881	TraesCS1B02G389500	0.750006	0.00496406
KN9204-Specific	chr1B:623896467-623896881	TraesCS1B02G389800	0.640352	0.0248872
KN9204-Specific	chr1B:623896467-623896881	TraesCS1B02G390000	0.795746	0.00196442
KN9204-Specific	chr1B:623896467-623896881	TraesCS1B02G390100	0.700715	0.0111388
KN9204-Specific	chr1B:623896467-623896881	TraesCS1B02G390200	0.747335	0.00520925
KN9204-Specific	chr1B:623896467-623896881	TraesCS1B02G390300	0.680457	0.0148757
KN9204-Specific	chr1B:623896467-623896881	TraesCS1B02G390600	0.586188	0.0451662
KN9204-Specific	chr1B:623897240-623897430	TraesCS1B02G389500	0.656964	0.0202825
KN9204-Specific	chr1B:623897240-623897430	TraesCS1B02G389800	0.610886	0.034849
KN9204-Specific	chr1B:623897240-623897430	TraesCS1B02G390000	0.713407	0.0091846
KN9204-Specific	chr1B:623897240-623897430	TraesCS1B02G390600	0.655141	0.0207549
KN9204-Specific	chr1B:623897623-623897833	TraesCS1B02G389500	0.724513	0.00769521
KN9204-Specific	chr1B:623897623-623897833	TraesCS1B02G389800	0.732156	0.00678082
KN9204-Specific	chr1B:623897623-623897833	TraesCS1B02G390000	0.702758	0.0108051
KN9204-Specific	chr1B:623897623-623897833	TraesCS1B02G390100	0.786952	0.00238708
KN9204-Specific	chr1B:623897623-623897833	TraesCS1B02G390200	0.702449	0.0108551
KN9204-Specific	chr1B:623897623-623897833	TraesCS1B02G390300	0.636824	0.0259552
KN9204-Specific	chr1B:623898720-623899034	TraesCS1B02G389500	0.805758	0.00155575
KN9204-Specific	chr1B:623898720-623899034	TraesCS1B02G389800	0.637108	0.025868
KN9204-Specific	chr1B:623898720-623899034	TraesCS1B02G390000	0.735128	0.00644835
KN9204-Specific	chr1B:623898720-623899034	TraesCS1B02G390100	0.64213	0.0243613
KN9204-Specific	chr1B:623898720-623899034	TraesCS1B02G390200	0.799882	0.00178674
KN9204-Specific	chr1B:623898720-623899034	TraesCS1B02G390300	0.728007	0.00726642
KN9204-Specific	chr1B:623898720-623899034	TraesCS1B02G390600	0.674437	0.0161455
KN9204-Specific	chr1B:623947939-623948255	TraesCS1B02G389500	0.592811	0.0422118
KN9204-Specific	chr1B:623947939-623948255	TraesCS1B02G389800	0.789827	0.00224194
KN9204-Specific	chr1B:623947939-623948255	TraesCS1B02G390100	0.758902	0.00420967
KN9204-Specific	chr1B:623965225-623965370	TraesCS1B02G389500	0.756242	0.00442542
KN9204-Specific	chr1B:623965225-623965370	TraesCS1B02G389800	0.877357	0.000177238
KN9204-Specific	chr1B:623965225-623965370	TraesCS1B02G390000	0.648111	0.0226513
KN9204-Specific	chr1B:623965225-623965370	TraesCS1B02G390100	0.89727	7.56647e-05
KN9204-Specific	chr1B:623965225-623965370	TraesCS1B02G390200	0.695356	0.0120504
KN9204-Specific	chr1B:623965225-623965370	TraesCS1B02G390300	0.62641	0.0293006
KN9204-Specific	chr1B:623965225-623965370	TraesCS1B02G390600	0.612418	0.0342706
KN9204-Specific	chr1B:623965709-623966246	TraesCS1B02G389800	0.738306	0.00610641
KN9204-Specific	chr1B:623965709-623966246	TraesCS1B02G390000	0.629738	0.0281996
KN9204-Specific	chr1B:623965709-623966246	TraesCS1B02G390100	0.787	0.00238461
KN9204-Specific	chr1B:623968093-623968511	TraesCS1B02G389500	0.726221	0.00748332
KN9204-Specific	chr1B:623968093-623968511	TraesCS1B02G389800	0.659132	0.0197314
KN9204-Specific	chr1B:623968093-623968511	TraesCS1B02G390000	0.754899	0.00453747
KN9204-Specific	chr1B:623968093-623968511	TraesCS1B02G390100	0.706362	0.0102346
KN9204-Specific	chr1B:623968093-623968511	TraesCS1B02G390200	0.717184	0.00865584
KN9204-Specific	chr1B:623968093-623968511	TraesCS1B02G390300	0.654095	0.0210293
KN9204-Specific	chr1B:623972409-623972740	TraesCS1B02G389500	0.605833	0.0368067
KN9204-Specific	chr1B:623972409-623972740	TraesCS1B02G389800	0.74162	0.00576465
KN9204-Specific	chr1B:623972409-623972740	TraesCS1B02G390000	0.731843	0.00681663
KN9204-Specific	chr1B:623972409-623972740	TraesCS1B02G390100	0.831866	0.000792106
KN9204-Specific	chr1B:623973275-623973436	TraesCS1B02G390000	0.700621	0.0111543
KN9204-Specific	chr1B:623973275-623973436	TraesCS1B02G390100	0.663099	0.0187509
KN9204-Specific	chr1B:624012503-624014069	TraesCS1B02G389600	0.595125	0.0412128
KN9204-Specific	chr1B:624012503-624014069	TraesCS1B02G389800	0.746289	0.00530775
KN9204-Specific	chr1B:624012503-624014069	TraesCS1B02G390000	0.734852	0.0064787
KN9204-Specific	chr1B:624012503-624014069	TraesCS1B02G390100	0.755696	0.00447073
KN9204-Specific	chr1B:624027832-624028352	TraesCS1B02G389600	0.712391	0.00933074
KN9204-Specific	chr1B:624027832-624028352	TraesCS1B02G390000	0.692033	0.0126429
KN9204-Specific	chr1B:627683188-627683340	TraesCS1B02G396300	0.5779	0.0490655
KN9204-Specific	chr1B:627785693-627786606	TraesCS1B02G396300	0.619577	0.0316579
KN9204-Specific	chr1B:627989199-627990106	TraesCS1B02G396300	0.652379	0.0214855
KN9204-Specific	chr1B:628213399-628213685	TraesCS1B02G396300	0.689709	0.0130697
KN9204-Specific	chr1B:628951068-628951314	TraesCS1B02G397400	0.688242	0.0133447
KN9204-Specific	chr1B:629035343-629036083	TraesCS1B02G398400	0.603631	0.0376839
KN9204-Specific	chr1B:629152715-629153114	TraesCS1B02G397800	0.746143	0.00532165
KN9204-Specific	chr1B:629152715-629153114	TraesCS1B02G398400	0.715008	0.00895755
KN9204-Specific	chr1B:629669448-629669672	TraesCS1B02G398400	0.615621	0.0330835
KN9204-Specific	chr1B:629854385-629854635	TraesCS1B02G398600	0.757856	0.00429351
KN9204-Specific	chr1B:632881214-632881798	TraesCS1B02G403300	0.77771	0.00290263
KN9204-Specific	chr1B:632881214-632881798	TraesCS1B02G403400	0.688607	0.0132758
KN9204-Specific	chr1B:632881214-632881798	TraesCS1B02G403600	0.88833	0.000113066
KN9204-Specific	chr1B:632881214-632881798	TraesCS1B02G403700	0.882241	0.000145887
KN9204-Specific	chr1B:632882081-632882472	TraesCS1B02G403300	0.870319	0.000231408
KN9204-Specific	chr1B:632882081-632882472	TraesCS1B02G403400	0.784564	0.00251298
KN9204-Specific	chr1B:632882081-632882472	TraesCS1B02G403600	0.954976	1.35078e-06
KN9204-Specific	chr1B:632882081-632882472	TraesCS1B02G403700	0.950139	2.23171e-06
KN9204-Specific	chr1B:632882081-632882472	TraesCS1B02G403900	0.623188	0.030396
KN9204-Specific	chr1B:632882992-632883490	TraesCS1B02G403300	0.866323	0.00026745
KN9204-Specific	chr1B:632882992-632883490	TraesCS1B02G403400	0.797719	0.00187807
KN9204-Specific	chr1B:632882992-632883490	TraesCS1B02G403600	0.946344	3.1996e-06
KN9204-Specific	chr1B:632882992-632883490	TraesCS1B02G403700	0.913924	3.21601e-05
KN9204-Specific	chr1B:632889041-632889241	TraesCS1B02G403600	0.717582	0.0086015
KN9204-Specific	chr1B:632889041-632889241	TraesCS1B02G403700	0.730757	0.00694176
KN9204-Specific	chr1B:632890234-632890705	TraesCS1B02G403300	0.760618	0.00407479
KN9204-Specific	chr1B:632890234-632890705	TraesCS1B02G403400	0.669448	0.0172568
KN9204-Specific	chr1B:632890234-632890705	TraesCS1B02G403600	0.959623	7.89708e-07
KN9204-Specific	chr1B:632890234-632890705	TraesCS1B02G403700	0.972137	1.26208e-07
KN9204-Specific	chr1B:632891164-632891477	TraesCS1B02G403300	0.805031	0.00158299
KN9204-Specific	chr1B:632891164-632891477	TraesCS1B02G403400	0.739921	0.00593794
KN9204-Specific	chr1B:632891164-632891477	TraesCS1B02G403600	0.962428	5.53568e-07
KN9204-Specific	chr1B:632891164-632891477	TraesCS1B02G403700	0.949592	2.3545e-06
KN9204-Specific	chr1B:633184428-633184648	TraesCS1B02G403300	0.760165	0.00411004
KN9204-Specific	chr1B:633184428-633184648	TraesCS1B02G403400	0.651215	0.0217991
KN9204-Specific	chr1B:633184428-633184648	TraesCS1B02G403600	0.878874	0.000166991
KN9204-Specific	chr1B:633184428-633184648	TraesCS1B02G403700	0.90646	4.81177e-05
KN9204-Specific	chr1B:633184428-633184648	TraesCS1B02G403900	0.619945	0.0315277
KN9204-Specific	chr1B:633184940-633185159	TraesCS1B02G403300	0.726203	0.00748549
KN9204-Specific	chr1B:633184940-633185159	TraesCS1B02G403400	0.641461	0.0245582
KN9204-Specific	chr1B:633184940-633185159	TraesCS1B02G403600	0.876467	0.000183482
KN9204-Specific	chr1B:633184940-633185159	TraesCS1B02G403700	0.860037	0.00033283
KN9204-Specific	chr1B:633186090-633186429	TraesCS1B02G403300	0.618467	0.0320532
KN9204-Specific	chr1B:633186090-633186429	TraesCS1B02G403600	0.632302	0.0273718
KN9204-Specific	chr1B:633186090-633186429	TraesCS1B02G403700	0.59095	0.0430278
KN9204-Specific	chr1B:633189129-633189260	TraesCS1B02G403300	0.908498	4.32509e-05
KN9204-Specific	chr1B:633189129-633189260	TraesCS1B02G403400	0.82851	0.000869165
KN9204-Specific	chr1B:633189129-633189260	TraesCS1B02G403600	0.91667	2.74767e-05
KN9204-Specific	chr1B:633189129-633189260	TraesCS1B02G403700	0.887446	0.000117435
KN9204-Specific	chr1B:633194139-633194318	TraesCS1B02G403300	0.639518	0.0251368
KN9204-Specific	chr1B:633194139-633194318	TraesCS1B02G403600	0.732824	0.00670499
KN9204-Specific	chr1B:633194139-633194318	TraesCS1B02G403700	0.755621	0.00447699
KN9204-Specific	chr1B:633195961-633196427	TraesCS1B02G403300	0.750181	0.00494827
KN9204-Specific	chr1B:633195961-633196427	TraesCS1B02G403400	0.648716	0.0224833
KN9204-Specific	chr1B:633195961-633196427	TraesCS1B02G403600	0.913607	3.27393e-05
KN9204-Specific	chr1B:633195961-633196427	TraesCS1B02G403700	0.927566	1.38928e-05
KN9204-Specific	chr1B:633242014-633242221	TraesCS1B02G403300	0.602164	0.0382765
KN9204-Specific	chr1B:633242014-633242221	TraesCS1B02G403600	0.751108	0.00486539
KN9204-Specific	chr1B:633242014-633242221	TraesCS1B02G403700	0.740484	0.00588007
KN9204-Specific	chr1B:633242014-633242221	TraesCS1B02G405800	0.580121	0.0479981
KN9204-Specific	chr1B:633341422-633341786	TraesCS1B02G403600	0.631534	0.0276181
KN9204-Specific	chr1B:633341422-633341786	TraesCS1B02G403700	0.725873	0.00752612
KN9204-Specific	chr1B:633341422-633341786	TraesCS1B02G403900	0.665621	0.0181466
KN9204-Specific	chr1B:634252193-634252504	TraesCS1B02G407500	0.811195	0.0013631
KN9204-Specific	chr1B:634277627-634277938	TraesCS1B02G407500	0.624376	0.0299887
KN9204-Specific	chr1B:634411503-634411807	TraesCS1B02G407500	0.580661	0.0477413
KN9204-Specific	chr1B:634921728-634922212	TraesCS1B02G407500	0.590274	0.0433269
KN9204-Specific	chr1B:635938865-635939013	TraesCS1B02G408200	0.579022	0.0485243
KN9204-Specific	chr1B:635938865-635939013	TraesCS1B02G408300	0.766538	0.00363433
KN9204-Specific	chr1B:639483939-639484117	TraesCS1B02G414600	0.622585	0.0306042
KN9204-Specific	chr1B:639483939-639484117	TraesCS1B02G414700	0.844049	0.000555698
KN9204-Specific	chr1B:639520083-639520490	TraesCS1B02G414600	0.721458	0.00808546
KN9204-Specific	chr1B:639520083-639520490	TraesCS1B02G414700	0.898224	7.23347e-05
KN9204-Specific	chr1B:639899821-639900023	TraesCS1B02G414600	0.701847	0.0109529
KN9204-Specific	chr1B:639899821-639900023	TraesCS1B02G414700	0.885508	0.000127466
KN9204-Specific	chr1B:639899821-639900023	TraesCS1B02G415200	0.684739	0.0140184
KN9204-Specific	chr1B:639901799-639902099	TraesCS1B02G414700	0.609882	0.035232
KN9204-Specific	chr1B:639901799-639902099	TraesCS1B02G415200	0.648932	0.0224234
KN9204-Specific	chr1B:640189201-640189775	TraesCS1B02G415200	0.799854	0.00178788
KN9204-Specific	chr1B:640189201-640189775	TraesCS1B02G415500	0.611962	0.0344422
KN9204-Specific	chr1B:640222888-640223143	TraesCS1B02G415200	0.729954	0.0070354
KN9204-Specific	chr1B:640222888-640223143	TraesCS1B02G415500	0.599173	0.0395053
KN9204-Specific	chr1B:640224020-640224393	TraesCS1B02G415200	0.848927	0.00047817
KN9204-Specific	chr1B:640224020-640224393	TraesCS1B02G415500	0.752446	0.00474772
KN9204-Specific	chr1B:640419968-640420721	TraesCS1B02G415200	0.789859	0.00224038
KN9204-Specific	chr1B:640419968-640420721	TraesCS1B02G415500	0.583673	0.0463256
KN9204-Specific	chr1B:640419968-640420721	TraesCS1B02G415700	0.925282	1.61629e-05
KN9204-Specific	chr1B:640421879-640422270	TraesCS1B02G415200	0.91082	3.81882e-05
KN9204-Specific	chr1B:640421879-640422270	TraesCS1B02G415500	0.869228	0.000240846
KN9204-Specific	chr1B:640421879-640422270	TraesCS1B02G415700	0.805599	0.00156166
KN9204-Specific	chr1B:640436746-640437288	TraesCS1B02G415200	0.821001	0.00106252
KN9204-Specific	chr1B:640436746-640437288	TraesCS1B02G415500	0.650287	0.0220512
KN9204-Specific	chr1B:640436746-640437288	TraesCS1B02G415700	0.927879	1.36026e-05
KN9204-Specific	chr1B:640440925-640441111	TraesCS1B02G415200	0.8079	0.00147752
KN9204-Specific	chr1B:640440925-640441111	TraesCS1B02G415500	0.697609	0.0116607
KN9204-Specific	chr1B:640443308-640443746	TraesCS1B02G415200	0.712455	0.0093215
KN9204-Specific	chr1B:640443308-640443746	TraesCS1B02G415700	0.814665	0.00125012
KN9204-Specific	chr1B:640455847-640456278	TraesCS1B02G415200	0.737877	0.0061517
KN9204-Specific	chr1B:640455847-640456278	TraesCS1B02G415700	0.864638	0.000283894
KN9204-Specific	chr1B:640458103-640458337	TraesCS1B02G415200	0.764594	0.00377478
KN9204-Specific	chr1B:640458103-640458337	TraesCS1B02G415500	0.670972	0.0169114
KN9204-Specific	chr1B:640458103-640458337	TraesCS1B02G415700	0.78222	0.00264146
KN9204-Specific	chr1B:640482372-640482524	TraesCS1B02G415200	0.706248	0.0102523
KN9204-Specific	chr1B:640482372-640482524	TraesCS1B02G415400	0.69578	0.0119763
KN9204-Specific	chr1B:640482372-640482524	TraesCS1B02G415700	0.687649	0.0134569
KN9204-Specific	chr1B:640482372-640482524	TraesCS1B02G415800	0.667873	0.0176191
KN9204-Specific	chr1B:640783386-640783633	TraesCS1B02G415500	0.80912	0.00143431
KN9204-Specific	chr1B:640783386-640783633	TraesCS1B02G415700	0.740823	0.00584543
KN9204-Specific	chr1B:640786028-640787023	TraesCS1B02G415500	0.746156	0.00532036
KN9204-Specific	chr1B:640786028-640787023	TraesCS1B02G415700	0.850485	0.000455273
KN9204-Specific	chr1B:641536258-641536389	TraesCS1B02G416700	0.691838	0.0126782
KN9204-Specific	chr1B:641605367-641605559	TraesCS1B02G416700	0.802986	0.00166165
KN9204-Specific	chr1B:641894733-641895416	TraesCS1B02G416700	0.64791	0.0227073
KN9204-Specific	chr1B:645672427-645672640	TraesCS1B02G421300	0.717097	0.00866776
KN9204-Specific	chr1B:645672427-645672640	TraesCS1B02G421800	0.796825	0.00191683
KN9204-Specific	chr1B:649635510-649636334	TraesCS1B02G425200	0.921718	2.02785e-05
KN9204-Specific	chr1B:649672869-649673161	TraesCS1B02G425200	0.862985	0.000300775
KN9204-Specific	chr1B:649675856-649676204	TraesCS1B02G425200	0.792774	0.00210028
KN9204-Specific	chr1B:649677130-649678051	TraesCS1B02G425200	0.941902	4.72631e-06
KN9204-Specific	chr1B:649974228-649974770	TraesCS1B02G425200	0.96686	2.97748e-07
KN9204-Specific	chr1B:649980909-649981346	TraesCS1B02G425200	0.90416	5.41146e-05
KN9204-Specific	chr1B:649983036-649983157	TraesCS1B02G425200	0.714114	0.00908383
KN9204-Specific	chr1B:650049203-650049511	TraesCS1B02G425200	0.847422	0.000501131
KN9204-Specific	chr1B:650050104-650051524	TraesCS1B02G425200	0.894475	8.61144e-05
KN9204-Specific	chr1B:651273542-651273790	TraesCS1B02G425300	0.876162	0.000185657
KN9204-Specific	chr1B:651290638-651290865	TraesCS1B02G425300	0.857649	0.000360691
KN9204-Specific	chr1B:651290638-651290865	TraesCS1B02G425500	0.658343	0.0199305
KN9204-Specific	chr1B:651302615-651302823	TraesCS1B02G425300	0.901939	6.04488e-05
KN9204-Specific	chr1B:651302615-651302823	TraesCS1B02G425500	0.758784	0.00421909
KN9204-Specific	chr1B:651304025-651304717	TraesCS1B02G425300	0.772976	0.00319751
KN9204-Specific	chr1B:651304025-651304717	TraesCS1B02G425500	0.88561	0.000126925
KN9204-Specific	chr1B:651452811-651453686	TraesCS1B02G425300	0.684725	0.0140211
KN9204-Specific	chr1B:651452811-651453686	TraesCS1B02G425500	0.752798	0.00471707
KN9204-Specific	chr1B:651476511-651476789	TraesCS1B02G425500	0.757271	0.00434097
KN9204-Specific	chr1B:651477561-651478026	TraesCS1B02G425300	0.874063	0.000201196
KN9204-Specific	chr1B:651477561-651478026	TraesCS1B02G425500	0.873657	0.000204311
KN9204-Specific	chr1B:651481395-651482088	TraesCS1B02G425500	0.870443	0.000230353
KN9204-Specific	chr1B:651534755-651535478	TraesCS1B02G425500	0.698341	0.0115361
KN9204-Specific	chr1B:652093837-652094250	TraesCS1B02G426400	0.688809	0.0132378
KN9204-Specific	chr1B:652093837-652094250	TraesCS1B02G427100	0.732361	0.00675747
KN9204-Specific	chr1B:652094774-652094985	TraesCS1B02G426400	0.579539	0.0482762
KN9204-Specific	chr1B:652094774-652094985	TraesCS1B02G426600	0.63811	0.0255621
KN9204-Specific	chr1B:652094774-652094985	TraesCS1B02G427100	0.606463	0.0365587
KN9204-Specific	chr1B:652096242-652096425	TraesCS1B02G426400	0.674562	0.0161184
KN9204-Specific	chr1B:652096242-652096425	TraesCS1B02G427100	0.73413	0.00655852
KN9204-Specific	chr1B:652098233-652098471	TraesCS1B02G426400	0.713145	0.00922213
KN9204-Specific	chr1B:652098233-652098471	TraesCS1B02G427100	0.789091	0.00227843
KN9204-Specific	chr1B:652242915-652243521	TraesCS1B02G426400	0.668744	0.0174179
KN9204-Specific	chr1B:652242915-652243521	TraesCS1B02G427100	0.764447	0.00378559
KN9204-Specific	chr1B:652246334-652246537	TraesCS1B02G426400	0.632944	0.0271674
KN9204-Specific	chr1B:652246334-652246537	TraesCS1B02G426600	0.581132	0.0475178
KN9204-Specific	chr1B:652246334-652246537	TraesCS1B02G427100	0.700914	0.011106
KN9204-Specific	chr1B:652255423-652255593	TraesCS1B02G426600	0.594956	0.0412849
KN9204-Specific	chr1B:652255423-652255593	TraesCS1B02G427100	0.623248	0.0303753
KN9204-Specific	chr1B:652266722-652267298	TraesCS1B02G427100	0.622134	0.0307603
KN9204-Specific	chr1B:652268625-652269287	TraesCS1B02G426400	0.695489	0.0120271
KN9204-Specific	chr1B:652268625-652269287	TraesCS1B02G427100	0.778343	0.00286484
KN9204-Specific	chr1B:652275626-652275886	TraesCS1B02G427100	0.634271	0.0267484
KN9204-Specific	chr1B:652276780-652276933	TraesCS1B02G426400	0.604496	0.0373376
KN9204-Specific	chr1B:652276780-652276933	TraesCS1B02G427100	0.707056	0.0101274
KN9204-Specific	chr1B:652285190-652285879	TraesCS1B02G426400	0.695519	0.0120219
KN9204-Specific	chr1B:652285190-652285879	TraesCS1B02G427100	0.787462	0.00236084
KN9204-Specific	chr1B:653272522-653272954	TraesCS1B02G428200	0.804618	0.00159866
KN9204-Specific	chr1B:653275674-653275786	TraesCS1B02G428200	0.795248	0.0019867
KN9204-Specific	chr1B:653315276-653315556	TraesCS1B02G427700	0.654256	0.020987
KN9204-Specific	chr1B:653322214-653322405	TraesCS1B02G428200	0.762078	0.0039626
KN9204-Specific	chr1B:653478587-653478785	TraesCS1B02G428200	0.849516	0.000469414
KN9204-Specific	chr1B:653483040-653483330	TraesCS1B02G428200	0.635019	0.0265142
KN9204-Specific	chr1B:653483040-653483330	TraesCS1B02G428700	0.640211	0.0249293
KN9204-Specific	chr1B:653522556-653522680	TraesCS1B02G428800	0.773317	0.00317553
KN9204-Specific	chr1B:653674608-653675322	TraesCS1B02G428200	0.614567	0.0334707
KN9204-Specific	chr1B:653674608-653675322	TraesCS1B02G428800	0.718423	0.00848749
KN9204-Specific	chr1B:653699576-653699858	TraesCS1B02G428800	0.641998	0.0244001
KN9204-Specific	chr1B:653702572-653702892	TraesCS1B02G428000	0.612187	0.0343574
KN9204-Specific	chr1B:653702572-653702892	TraesCS1B02G428800	0.80558	0.00156238
KN9204-Specific	chr1B:653725621-653725774	TraesCS1B02G428000	0.629901	0.0281464
KN9204-Specific	chr1B:653725621-653725774	TraesCS1B02G428800	0.776847	0.00295479
KN9204-Specific	chr1B:653726160-653726775	TraesCS1B02G428800	0.862705	0.000303721
KN9204-Specific	chr1B:653796141-653796277	TraesCS1B02G428700	0.578142	0.0489482
KN9204-Specific	chr1B:653796141-653796277	TraesCS1B02G428800	0.752491	0.00474374
KN9204-Specific	chr1B:653817764-653817876	TraesCS1B02G428200	0.602781	0.0380265
KN9204-Specific	chr1B:653817764-653817876	TraesCS1B02G428700	0.648352	0.0225841
KN9204-Specific	chr1B:653817764-653817876	TraesCS1B02G428800	0.706176	0.0102635
KN9204-Specific	chr1B:653823434-653823934	TraesCS1B02G428800	0.774648	0.00309085
KN9204-Specific	chr1B:653824561-653825066	TraesCS1B02G428800	0.691777	0.0126893
KN9204-Specific	chr1B:653826296-653826634	TraesCS1B02G428800	0.736343	0.00631589
KN9204-Specific	chr1B:653853153-653853517	TraesCS1B02G428800	0.6143	0.0335692
KN9204-Specific	chr1B:653978992-653979341	TraesCS1B02G428800	0.617283	0.032479
KN9204-Specific	chr1B:653981981-653982192	TraesCS1B02G428800	0.846156	0.000521107
KN9204-Specific	chr1B:655600581-655600772	TraesCS1B02G431300	0.641469	0.0245559
KN9204-Specific	chr1B:655621898-655622096	TraesCS1B02G431300	0.700215	0.0112216
KN9204-Specific	chr1B:655780168-655780402	TraesCS1B02G431300	0.789405	0.00226279
KN9204-Specific	chr1B:655851129-655851468	TraesCS1B02G431300	0.720025	0.00827344
KN9204-Specific	chr1B:655855715-655855858	TraesCS1B02G431300	0.758975	0.00420382
KN9204-Specific	chr1B:656007912-656008186	TraesCS1B02G431300	0.595707	0.040964
KN9204-Specific	chr1B:656162345-656162523	TraesCS1B02G431300	0.746613	0.00527712
KN9204-Specific	chr1B:658405297-658405437	TraesCS1B02G434000	0.660887	0.0192931
KN9204-Specific	chr1B:658405297-658405437	TraesCS1B02G434200	0.584273	0.0460471
KN9204-Specific	chr1B:658405828-658406306	TraesCS1B02G434000	0.632683	0.0272504
KN9204-Specific	chr1B:658418735-658419423	TraesCS1B02G434000	0.770328	0.00337201
KN9204-Specific	chr1B:658418735-658419423	TraesCS1B02G434200	0.611744	0.0345243
KN9204-Specific	chr1B:658419862-658420340	TraesCS1B02G434000	0.77186	0.0032702
KN9204-Specific	chr1B:658419862-658420340	TraesCS1B02G434200	0.603686	0.0376619
KN9204-Specific	chr1B:658427220-658427441	TraesCS1B02G434000	0.626876	0.0291446
KN9204-Specific	chr1B:658427220-658427441	TraesCS1B02G434200	0.851544	0.000440189
KN9204-Specific	chr1B:658470959-658471396	TraesCS1B02G434000	0.760739	0.00406535
KN9204-Specific	chr1B:658470959-658471396	TraesCS1B02G434200	0.605592	0.036902
KN9204-Specific	chr1B:658471595-658471719	TraesCS1B02G434000	0.75575	0.00446625
KN9204-Specific	chr1B:658471595-658471719	TraesCS1B02G434200	0.687504	0.0134846
KN9204-Specific	chr1B:658510302-658510680	TraesCS1B02G434000	0.814753	0.00124736
KN9204-Specific	chr1B:658511582-658511952	TraesCS1B02G434000	0.687371	0.0135099
KN9204-Specific	chr1B:658518808-658518982	TraesCS1B02G434000	0.692364	0.0125828
KN9204-Specific	chr1B:658518808-658518982	TraesCS1B02G434200	0.658492	0.019893
KN9204-Specific	chr1B:658519010-658519310	TraesCS1B02G434000	0.734685	0.00649703
KN9204-Specific	chr1B:658519010-658519310	TraesCS1B02G434200	0.802927	0.00166397
KN9204-Specific	chr1B:658522553-658522824	TraesCS1B02G434000	0.592664	0.0422758
KN9204-Specific	chr1B:658522553-658522824	TraesCS1B02G434700	0.690383	0.0129448
KN9204-Specific	chr1B:658532424-658532748	TraesCS1B02G434000	0.647145	0.0229214
KN9204-Specific	chr1B:658583379-658584223	TraesCS1B02G434000	0.77596	0.00300909
KN9204-Specific	chr1B:658583379-658584223	TraesCS1B02G434200	0.691655	0.0127116
KN9204-Specific	chr1B:658601717-658602347	TraesCS1B02G434000	0.785462	0.00246506
KN9204-Specific	chr1B:658601717-658602347	TraesCS1B02G434200	0.653807	0.0211055
KN9204-Specific	chr1B:658621841-658623118	TraesCS1B02G434000	0.751265	0.00485148
KN9204-Specific	chr1B:658621841-658623118	TraesCS1B02G434200	0.723705	0.00779706
KN9204-Specific	chr1B:658623162-658623336	TraesCS1B02G434000	0.585238	0.0456015
KN9204-Specific	chr1B:658623162-658623336	TraesCS1B02G434200	0.908927	4.22782e-05
KN9204-Specific	chr1B:658624470-658624880	TraesCS1B02G434000	0.702985	0.0107685
KN9204-Specific	chr1B:658624470-658624880	TraesCS1B02G434200	0.608499	0.0357643
KN9204-Specific	chr1B:658691818-658692163	TraesCS1B02G434000	0.731238	0.00688608
KN9204-Specific	chr1B:658692474-658692935	TraesCS1B02G434000	0.779951	0.00277051
KN9204-Specific	chr1B:658692474-658692935	TraesCS1B02G434200	0.604442	0.0373593
KN9204-Specific	chr1B:658693182-658693384	TraesCS1B02G434000	0.637087	0.0258744
KN9204-Specific	chr1B:658693182-658693384	TraesCS1B02G434200	0.637489	0.0257513
KN9204-Specific	chr1B:658693713-658693941	TraesCS1B02G434000	0.720877	0.00816127
KN9204-Specific	chr1B:658699244-658700343	TraesCS1B02G434000	0.782913	0.00260298
KN9204-Specific	chr1B:658699244-658700343	TraesCS1B02G434200	0.659139	0.0197296
KN9204-Specific	chr1B:658701014-658701294	TraesCS1B02G434000	0.765313	0.00372236
KN9204-Specific	chr1B:658701014-658701294	TraesCS1B02G434200	0.721703	0.00805361
KN9204-Specific	chr1B:658706264-658706509	TraesCS1B02G434000	0.752094	0.00477844
KN9204-Specific	chr1B:658706264-658706509	TraesCS1B02G434200	0.617495	0.0324024
KN9204-Specific	chr1B:658720504-658720975	TraesCS1B02G434000	0.593839	0.0417659
KN9204-Specific	chr1B:658776689-658776825	TraesCS1B02G434200	0.71136	0.00948098
KN9204-Specific	chr1B:658777263-658777424	TraesCS1B02G434200	0.751011	0.00487408
KN9204-Specific	chr1B:658777508-658777731	TraesCS1B02G434000	0.694548	0.0121926
KN9204-Specific	chr1B:658787069-658787997	TraesCS1B02G434000	0.762707	0.00391499
KN9204-Specific	chr1B:658787069-658787997	TraesCS1B02G434200	0.663892	0.0185592
KN9204-Specific	chr1B:658825170-658825502	TraesCS1B02G434000	0.758083	0.00427526
KN9204-Specific	chr1B:658826611-658826862	TraesCS1B02G434000	0.829291	0.000850745
KN9204-Specific	chr1B:658826611-658826862	TraesCS1B02G434200	0.70461	0.0105091
KN9204-Specific	chr1B:659084149-659084398	TraesCS1B02G434200	0.602756	0.0380367
KN9204-Specific	chr1B:659392391-659393244	TraesCS1B02G436500	0.821725	0.00104258
KN9204-Specific	chr1B:659652396-659652883	TraesCS1B02G436300	0.697669	0.0116504
KN9204-Specific	chr1B:659652396-659652883	TraesCS1B02G437200	0.825063	0.000954208
KN9204-Specific	chr1B:659652396-659652883	TraesCS1B02G437400	0.576978	0.0495134
KN9204-Specific	chr1B:659655434-659655682	TraesCS1B02G436300	0.631965	0.0274797
KN9204-Specific	chr1B:659655434-659655682	TraesCS1B02G437200	0.773981	0.00313304
KN9204-Specific	chr1B:659655434-659655682	TraesCS1B02G437400	0.677038	0.0155875
KN9204-Specific	chr1B:659677066-659677219	TraesCS1B02G436500	0.747	0.00524064
KN9204-Specific	chr1B:659677066-659677219	TraesCS1B02G437200	0.731739	0.00682853
KN9204-Specific	chr1B:659677066-659677219	TraesCS1B02G437300	0.70453	0.0105216
KN9204-Specific	chr1B:659677066-659677219	TraesCS1B02G437400	0.860141	0.000331658
KN9204-Specific	chr1B:659687055-659687411	TraesCS1B02G436500	0.775012	0.00306801
KN9204-Specific	chr1B:659687055-659687411	TraesCS1B02G437200	0.637481	0.0257537
KN9204-Specific	chr1B:659687055-659687411	TraesCS1B02G437300	0.752327	0.0047581
KN9204-Specific	chr1B:659687055-659687411	TraesCS1B02G437400	0.875541	0.000190151
KN9204-Specific	chr1B:659698795-659699388	TraesCS1B02G437200	0.658641	0.0198551
KN9204-Specific	chr1B:659698795-659699388	TraesCS1B02G437300	0.627535	0.0289251
KN9204-Specific	chr1B:659698795-659699388	TraesCS1B02G437400	0.63968	0.025088
KN9204-Specific	chr1B:659704880-659705284	TraesCS1B02G437200	0.726475	0.00745223
KN9204-Specific	chr1B:659714615-659714821	TraesCS1B02G436500	0.631344	0.0276789
KN9204-Specific	chr1B:659714615-659714821	TraesCS1B02G437200	0.59606	0.0408136
KN9204-Specific	chr1B:659714615-659714821	TraesCS1B02G437300	0.769278	0.00344323
KN9204-Specific	chr1B:659714615-659714821	TraesCS1B02G437400	0.759234	0.00418326
KN9204-Specific	chr1B:659749290-659750015	TraesCS1B02G435900	0.654806	0.0208425
KN9204-Specific	chr1B:659749290-659750015	TraesCS1B02G436300	0.793822	0.00205156
KN9204-Specific	chr1B:659749290-659750015	TraesCS1B02G437200	0.799166	0.00181657
KN9204-Specific	chr1B:659750104-659750359	TraesCS1B02G436300	0.641838	0.0244472
KN9204-Specific	chr1B:659750104-659750359	TraesCS1B02G437200	0.697978	0.0115977
KN9204-Specific	chr1B:659750104-659750359	TraesCS1B02G437300	0.672758	0.0165135
KN9204-Specific	chr1B:659750104-659750359	TraesCS1B02G437400	0.713734	0.00913779
KN9204-Specific	chr1B:659750555-659750737	TraesCS1B02G436300	0.683443	0.0142739
KN9204-Specific	chr1B:659750555-659750737	TraesCS1B02G437200	0.630645	0.0279048
KN9204-Specific	chr1B:659755594-659755859	TraesCS1B02G436300	0.663455	0.0186648
KN9204-Specific	chr1B:659755594-659755859	TraesCS1B02G437200	0.640225	0.0249253
KN9204-Specific	chr1B:659756979-659757195	TraesCS1B02G436300	0.69492	0.012127
KN9204-Specific	chr1B:659756979-659757195	TraesCS1B02G437200	0.693637	0.0123542
KN9204-Specific	chr1B:659756979-659757195	TraesCS1B02G437300	0.660411	0.0194111
KN9204-Specific	chr1B:659756979-659757195	TraesCS1B02G437400	0.654131	0.0210199
KN9204-Specific	chr1B:659758667-659759159	TraesCS1B02G435900	0.640779	0.0247601
KN9204-Specific	chr1B:659758667-659759159	TraesCS1B02G436300	0.749535	0.00500664
KN9204-Specific	chr1B:659758667-659759159	TraesCS1B02G437200	0.773406	0.00316982
KN9204-Specific	chr1B:659761478-659761837	TraesCS1B02G435900	0.709408	0.00977023
KN9204-Specific	chr1B:659761478-659761837	TraesCS1B02G436300	0.758832	0.00421523
KN9204-Specific	chr1B:659761478-659761837	TraesCS1B02G437200	0.848658	0.000482213
KN9204-Specific	chr1B:659771797-659771971	TraesCS1B02G436300	0.663208	0.0187244
KN9204-Specific	chr1B:659771797-659771971	TraesCS1B02G437200	0.839811	0.000630672
KN9204-Specific	chr1B:659771797-659771971	TraesCS1B02G437400	0.670347	0.0170526
KN9204-Specific	chr1B:659772264-659772763	TraesCS1B02G436500	0.679226	0.0151292
KN9204-Specific	chr1B:659772264-659772763	TraesCS1B02G437300	0.784732	0.00250398
KN9204-Specific	chr1B:659772264-659772763	TraesCS1B02G437400	0.784352	0.00252442
KN9204-Specific	chr1B:659983965-659984086	TraesCS1B02G437200	0.852611	0.000425393
KN9204-Specific	chr1B:659984328-659984651	TraesCS1B02G436500	0.610119	0.0351414
KN9204-Specific	chr1B:659984328-659984651	TraesCS1B02G437200	0.716843	0.00870268
KN9204-Specific	chr1B:659984328-659984651	TraesCS1B02G437400	0.732443	0.00674824
KN9204-Specific	chr1B:660056669-660056805	TraesCS1B02G436300	0.618159	0.0321636
KN9204-Specific	chr1B:660056669-660056805	TraesCS1B02G437200	0.763932	0.00382355
KN9204-Specific	chr1B:660056669-660056805	TraesCS1B02G437300	0.648384	0.0225754
KN9204-Specific	chr1B:660056669-660056805	TraesCS1B02G437400	0.746628	0.00527569
KN9204-Specific	chr1B:660060734-660061254	TraesCS1B02G436500	0.684557	0.0140541
KN9204-Specific	chr1B:660060734-660061254	TraesCS1B02G437200	0.581071	0.0475468
KN9204-Specific	chr1B:660060734-660061254	TraesCS1B02G437300	0.730267	0.00699882
KN9204-Specific	chr1B:660060734-660061254	TraesCS1B02G437400	0.794413	0.0020245
KN9204-Specific	chr1B:660061679-660061981	TraesCS1B02G436500	0.668351	0.0175085
KN9204-Specific	chr1B:660061679-660061981	TraesCS1B02G437200	0.64367	0.0239122
KN9204-Specific	chr1B:660061679-660061981	TraesCS1B02G437300	0.684822	0.0140021
KN9204-Specific	chr1B:660061679-660061981	TraesCS1B02G437400	0.788597	0.00230319
KN9204-Specific	chr1B:660075352-660075549	TraesCS1B02G436300	0.610331	0.0350604
KN9204-Specific	chr1B:660075352-660075549	TraesCS1B02G437200	0.810854	0.00137461
KN9204-Specific	chr1B:660075352-660075549	TraesCS1B02G437400	0.668888	0.017385
KN9204-Specific	chr1B:660076216-660077293	TraesCS1B02G436300	0.668146	0.0175558
KN9204-Specific	chr1B:660076216-660077293	TraesCS1B02G437200	0.769013	0.00346134
KN9204-Specific	chr1B:660076216-660077293	TraesCS1B02G437300	0.595011	0.0412615
KN9204-Specific	chr1B:660076216-660077293	TraesCS1B02G437400	0.648801	0.0224596
KN9204-Specific	chr1B:660092675-660093189	TraesCS1B02G436500	0.768852	0.00347244
KN9204-Specific	chr1B:660092675-660093189	TraesCS1B02G437300	0.824286	0.000974241
KN9204-Specific	chr1B:660092675-660093189	TraesCS1B02G437400	0.823696	0.000989662
KN9204-Specific	chr1B:660510977-660511224	TraesCS1B02G437200	0.814574	0.00125298
KN9204-Specific	chr1B:660510977-660511224	TraesCS1B02G437400	0.721752	0.00804721
KN9204-Specific	chr1B:662379769-662380293	TraesCS1B02G440900	0.665969	0.0180642
KN9204-Specific	chr1B:662379769-662380293	TraesCS1B02G441100	0.626679	0.0292105
KN9204-Specific	chr1B:662640542-662640654	TraesCS1B02G441100	0.639642	0.0250996
KN9204-Specific	chr1B:665148128-665148654	TraesCS1B02G444700	0.578616	0.0487196
KN9204-Specific	chr1B:665148128-665148654	TraesCS1B02G445300	0.658314	0.0199379
KN9204-Specific	chr1B:665208399-665208544	TraesCS1B02G444700	0.647738	0.0227554
KN9204-Specific	chr1B:665392318-665392431	TraesCS1B02G445000	0.583018	0.0466306
KN9204-Specific	chr1B:666359332-666359550	TraesCS1B02G446500	0.652436	0.0214703
KN9204-Specific	chr1B:666491872-666491996	TraesCS1B02G446500	0.646193	0.0231898
KN9204-Specific	chr1B:666507247-666507456	TraesCS1B02G446500	0.578366	0.04884
KN9204-Specific	chr1B:666510633-666510858	TraesCS1B02G446500	0.615045	0.0332945
KN9204-Specific	chr1B:666511186-666511317	TraesCS1B02G446000	0.584003	0.046172
KN9204-Specific	chr1B:666530871-666531330	TraesCS1B02G446500	0.646968	0.0229709
KN9204-Specific	chr1B:666566639-666567388	TraesCS1B02G446500	0.696971	0.0117701
KN9204-Specific	chr1B:667325252-667326002	TraesCS1B02G448500	0.623308	0.0303544
KN9204-Specific	chr1B:670152517-670152654	TraesCS1B02G453100	0.761328	0.00401987
KN9204-Specific	chr1B:670152517-670152654	TraesCS1B02G455000	0.599381	0.039419
KN9204-Specific	chr1B:670211327-670211463	TraesCS1B02G453700	0.619172	0.0318017
KN9204-Specific	chr1B:670682908-670683053	TraesCS1B02G454800	0.627284	0.0290085
KN9204-Specific	chr1B:670684666-670684864	TraesCS1B02G455000	0.668844	0.0173951
KN9204-Specific	chr1B:670742554-670742812	TraesCS1B02G455800	0.612372	0.034288
KN9204-Specific	chr1B:673594395-673594613	TraesCS1B02G459900	0.743095	0.00561718
KN9204-Specific	chr1B:673599599-673600037	TraesCS1B02G459900	0.859481	0.000339161
KN9204-Specific	chr1B:673778210-673778517	TraesCS1B02G459900	0.87738	0.000177079
KN9204-Specific	chr1B:673858208-673858492	TraesCS1B02G459900	0.899527	6.79743e-05
KN9204-Specific	chr1B:673858208-673858492	TraesCS1B02G460100	0.675603	0.0158936
KN9204-Specific	chr1B:673914997-673915351	TraesCS1B02G459700	0.579984	0.0480636
KN9204-Specific	chr1B:673914997-673915351	TraesCS1B02G459900	0.659706	0.0195871
KN9204-Specific	chr1B:673914997-673915351	TraesCS1B02G460100	0.623603	0.0302531
KN9204-Specific	chr1B:673915517-673915856	TraesCS1B02G459700	0.632235	0.0273933
KN9204-Specific	chr1B:673915517-673915856	TraesCS1B02G459800	0.633985	0.0268382
KN9204-Specific	chr1B:673915517-673915856	TraesCS1B02G459900	0.683834	0.0141964
KN9204-Specific	chr1B:673915517-673915856	TraesCS1B02G460100	0.768897	0.00346931
KN9204-Specific	chr1B:676170343-676170910	TraesCS1B02G465600	0.618896	0.0319
KN9204-Specific	chr1B:676171144-676171682	TraesCS1B02G465600	0.637935	0.0256152
KN9204-Specific	chr1B:676212401-676212975	TraesCS1B02G465600	0.716254	0.00878381
KN9204-Specific	chr1B:676452432-676452801	TraesCS1B02G465600	0.741537	0.00577297
KN9204-Specific	chr1B:677302824-677303089	TraesCS1B02G467700	0.586154	0.0451816
KN9204-Specific	chr1B:679205804-679206264	TraesCS1B02G471400	0.601458	0.0385643
KN9204-Specific	chr1B:679210643-679211134	TraesCS1B02G471400	0.625003	0.0297753
KN9204-Specific	chr1B:679214858-679215051	TraesCS1B02G471400	0.855682	0.000384969
KN9204-Specific	chr1B:679215626-679215762	TraesCS1B02G471400	0.725483	0.00757433
KN9204-Specific	chr1B:679216512-679216663	TraesCS1B02G471400	0.739345	0.0059977
KN9204-Specific	chr1B:679221524-679221794	TraesCS1B02G471400	0.771346	0.00330411
KN9204-Specific	chr1B:679237000-679237157	TraesCS1B02G471400	0.770382	0.00336842
KN9204-Specific	chr1B:679237214-679237401	TraesCS1B02G471400	0.619833	0.0315671
KN9204-Specific	chr1B:679237481-679237593	TraesCS1B02G471400	0.811167	0.00136406
KN9204-Specific	chr1B:679238058-679238419	TraesCS1B02G471400	0.752912	0.00470722
KN9204-Specific	chr1B:679238954-679239199	TraesCS1B02G471400	0.821983	0.00103551
KN9204-Specific	chr1B:679251713-679251844	TraesCS1B02G471400	0.809933	0.00140609
KN9204-Specific	chr1B:679252143-679252340	TraesCS1B02G471400	0.797178	0.00190144
KN9204-Specific	chr1B:679254347-679254939	TraesCS1B02G471400	0.593917	0.0417321
KN9204-Specific	chr1B:679265583-679265714	TraesCS1B02G471400	0.810883	0.00137364
KN9204-Specific	chr1B:679987728-679987934	TraesCS1B02G471400	0.7421	0.00571633
KN9204-Specific	chr1B:681482520-681483558	TraesCS1B02G472800	0.654231	0.0209935
KN9204-Specific	chr1B:681482520-681483558	TraesCS1B02G473900	0.59197	0.042579
KN9204-Specific	chr1B:687679350-687679584	TraesCS1B02G480400	0.684447	0.0140756
KN9204-Specific	chr1B:688071856-688072127	TraesCS1B02G480400	0.624529	0.0299366
KN9204-Specific	chr1B:688119694-688120335	TraesCS1B02G480400	0.756496	0.00440444
KN9204-Specific	chr1B:688131521-688131928	TraesCS1B02G480400	0.718518	0.00847466
KN9204-Specific	chr1B:688132032-688132509	TraesCS1B02G480400	0.649991	0.0221321
KN9204-Specific	chr1B:689484767-689485022	TraesCS1B02G481300	0.615425	0.0331553
KN9204-Specific	chr1B:689554436-689554567	TraesCS1B02G481300	0.65821	0.0199644
KN9204-Specific	chr1B:689618118-689618436	TraesCS1B02G481300	0.621521	0.0309741
KN9204-Specific	chr1B:689621537-689622024	TraesCS1B02G481300	0.579085	0.0484942
KN9204-Specific	chr1B:689658358-689658518	TraesCS1B02G481300	0.583447	0.0464305
KN9204-Specific	chr1B:689803543-689803683	TraesCS1B02G481300	0.639904	0.025021
KN9204-Specific	chr1D:44785-44906	TraesCS1D02G000100	0.640498	0.0248436
KN9204-Specific	chr1D:55809-56104	TraesCS1D02G002300	0.722837	0.00790752
KN9204-Specific	chr1D:126072-126208	TraesCS1D02G002300	0.735575	0.00639939
KN9204-Specific	chr1D:142669-142843	TraesCS1D02G000400	0.620486	0.0313366
KN9204-Specific	chr1D:142669-142843	TraesCS1D02G000600	0.871422	0.000222164
KN9204-Specific	chr1D:142669-142843	TraesCS1D02G001500	0.821509	0.00104848
KN9204-Specific	chr1D:142669-142843	TraesCS1D02G001700	0.624793	0.0298467
KN9204-Specific	chr1D:167527-167765	TraesCS1D02G000400	0.590508	0.0432233
KN9204-Specific	chr1D:167527-167765	TraesCS1D02G000600	0.893608	8.95756e-05
KN9204-Specific	chr1D:167527-167765	TraesCS1D02G001500	0.846501	0.000515596
KN9204-Specific	chr1D:167527-167765	TraesCS1D02G001700	0.664695	0.0183667
KN9204-Specific	chr1D:167527-167765	TraesCS1D02G001800	0.60867	0.0356985
KN9204-Specific	chr1D:168237-168733	TraesCS1D02G000400	0.66894	0.017373
KN9204-Specific	chr1D:168237-168733	TraesCS1D02G000600	0.783221	0.00258601
KN9204-Specific	chr1D:168237-168733	TraesCS1D02G001500	0.755972	0.00444778
KN9204-Specific	chr1D:168237-168733	TraesCS1D02G002300	0.743365	0.00559057
KN9204-Specific	chr1D:168237-168733	TraesCS1D02G002600	0.661168	0.0192236
KN9204-Specific	chr1D:186900-187215	TraesCS1D02G000400	0.706019	0.0102879
KN9204-Specific	chr1D:186900-187215	TraesCS1D02G000600	0.934271	8.64678e-06
KN9204-Specific	chr1D:186900-187215	TraesCS1D02G000800	0.619795	0.0315806
KN9204-Specific	chr1D:186900-187215	TraesCS1D02G001500	0.904652	5.27858e-05
KN9204-Specific	chr1D:186900-187215	TraesCS1D02G001700	0.727854	0.00728486
KN9204-Specific	chr1D:186900-187215	TraesCS1D02G001800	0.669129	0.0173296
KN9204-Specific	chr1D:207402-207649	TraesCS1D02G000400	0.623554	0.0302699
KN9204-Specific	chr1D:207402-207649	TraesCS1D02G000600	0.985967	4.18587e-09
KN9204-Specific	chr1D:207402-207649	TraesCS1D02G000800	0.616109	0.0329049
KN9204-Specific	chr1D:207402-207649	TraesCS1D02G001500	0.942166	4.62218e-06
KN9204-Specific	chr1D:207402-207649	TraesCS1D02G001700	0.764839	0.00375688
KN9204-Specific	chr1D:207402-207649	TraesCS1D02G001800	0.700738	0.011135
KN9204-Specific	chr1D:232041-232323	TraesCS1D02G002300	0.923538	1.80853e-05
KN9204-Specific	chr1D:232041-232323	TraesCS1D02G002600	0.741379	0.00578901
KN9204-Specific	chr1D:344052-344337	TraesCS1D02G000100	0.580864	0.0476447
KN9204-Specific	chr1D:344052-344337	TraesCS1D02G002300	0.911501	3.67939e-05
KN9204-Specific	chr1D:344052-344337	TraesCS1D02G002600	0.812521	0.00131905
KN9204-Specific	chr1D:344524-344966	TraesCS1D02G002300	0.955713	1.24541e-06
KN9204-Specific	chr1D:344524-344966	TraesCS1D02G002600	0.742102	0.00571608
KN9204-Specific	chr1D:344524-344966	TraesCS1D02G002700	0.587727	0.0444671
KN9204-Specific	chr1D:345024-345272	TraesCS1D02G002000	0.582238	0.0469962
KN9204-Specific	chr1D:345024-345272	TraesCS1D02G002300	0.891715	9.7512e-05
KN9204-Specific	chr1D:346044-346326	TraesCS1D02G002300	0.933631	9.06616e-06
KN9204-Specific	chr1D:346044-346326	TraesCS1D02G002600	0.79773	0.00187758
KN9204-Specific	chr1D:346044-346326	TraesCS1D02G002700	0.682022	0.0145579
KN9204-Specific	chr1D:346822-347404	TraesCS1D02G002300	0.909384	4.1259e-05
KN9204-Specific	chr1D:346822-347404	TraesCS1D02G002600	0.719913	0.00828823
KN9204-Specific	chr1D:346822-347404	TraesCS1D02G002700	0.608045	0.0359403
KN9204-Specific	chr1D:347674-347953	TraesCS1D02G002300	0.833634	0.000753692
KN9204-Specific	chr1D:347674-347953	TraesCS1D02G002600	0.748519	0.00509943
KN9204-Specific	chr1D:347674-347953	TraesCS1D02G002700	0.646755	0.023031
KN9204-Specific	chr1D:365500-365833	TraesCS1D02G000100	0.594196	0.0416116
KN9204-Specific	chr1D:365500-365833	TraesCS1D02G002300	0.923573	1.80441e-05
KN9204-Specific	chr1D:365500-365833	TraesCS1D02G002600	0.780238	0.00275392
KN9204-Specific	chr1D:365500-365833	TraesCS1D02G002700	0.606189	0.0366662
KN9204-Specific	chr1D:366692-367070	TraesCS1D02G002300	0.882618	0.000143665
KN9204-Specific	chr1D:366692-367070	TraesCS1D02G002600	0.789012	0.0022824
KN9204-Specific	chr1D:366692-367070	TraesCS1D02G002700	0.709543	0.00974999
KN9204-Specific	chr1D:406576-406793	TraesCS1D02G000400	0.60635	0.036603
KN9204-Specific	chr1D:406576-406793	TraesCS1D02G002300	0.75534	0.00450045
KN9204-Specific	chr1D:406576-406793	TraesCS1D02G002600	0.728438	0.00721486
KN9204-Specific	chr1D:538571-539085	TraesCS1D02G000531	0.729879	0.00704427
KN9204-Specific	chr1D:538571-539085	TraesCS1D02G000567	0.757063	0.00435793
KN9204-Specific	chr1D:538571-539085	TraesCS1D02G000582	0.73055	0.00696585
KN9204-Specific	chr1D:538571-539085	TraesCS1D02G000906	0.672747	0.0165159
KN9204-Specific	chr1D:538571-539085	TraesCS1D02G002000	0.792411	0.00211736
KN9204-Specific	chr1D:538571-539085	TraesCS1D02G002200	0.710245	0.00964541
KN9204-Specific	chr1D:538571-539085	TraesCS1D02G002300	0.774694	0.00308799
KN9204-Specific	chr1D:538571-539085	TraesCS1D02G002400	0.623472	0.0302981
KN9204-Specific	chr1D:538571-539085	TraesCS1D02G003300	0.687905	0.0134085
KN9204-Specific	chr1D:539232-539532	TraesCS1D02G000531	0.68926	0.0131534
KN9204-Specific	chr1D:539232-539532	TraesCS1D02G000567	0.70464	0.0105043
KN9204-Specific	chr1D:539232-539532	TraesCS1D02G000582	0.689569	0.0130957
KN9204-Specific	chr1D:539232-539532	TraesCS1D02G000906	0.879579	0.000162385
KN9204-Specific	chr1D:539232-539532	TraesCS1D02G002000	0.62101	0.0311527
KN9204-Specific	chr1D:539232-539532	TraesCS1D02G002200	0.645609	0.0233557
KN9204-Specific	chr1D:539232-539532	TraesCS1D02G002300	0.659539	0.0196289
KN9204-Specific	chr1D:539232-539532	TraesCS1D02G002400	0.612551	0.0342208
KN9204-Specific	chr1D:539796-540153	TraesCS1D02G000531	0.787329	0.00236763
KN9204-Specific	chr1D:539796-540153	TraesCS1D02G000567	0.815293	0.00123047
KN9204-Specific	chr1D:539796-540153	TraesCS1D02G000582	0.787837	0.00234168
KN9204-Specific	chr1D:539796-540153	TraesCS1D02G000906	0.639276	0.0252096
KN9204-Specific	chr1D:539796-540153	TraesCS1D02G001100	0.592884	0.0421801
KN9204-Specific	chr1D:539796-540153	TraesCS1D02G002000	0.878573	0.000168985
KN9204-Specific	chr1D:539796-540153	TraesCS1D02G002063	0.602859	0.0379951
KN9204-Specific	chr1D:539796-540153	TraesCS1D02G002200	0.78436	0.00252399
KN9204-Specific	chr1D:539796-540153	TraesCS1D02G002300	0.656957	0.0202843
KN9204-Specific	chr1D:544870-545401	TraesCS1D02G000300	0.581648	0.0472739
KN9204-Specific	chr1D:544870-545401	TraesCS1D02G000531	0.829423	0.000847653
KN9204-Specific	chr1D:544870-545401	TraesCS1D02G000567	0.855802	0.000383457
KN9204-Specific	chr1D:544870-545401	TraesCS1D02G000582	0.829773	0.000839525
KN9204-Specific	chr1D:544870-545401	TraesCS1D02G000906	0.686563	0.0136646
KN9204-Specific	chr1D:544870-545401	TraesCS1D02G001000	0.598333	0.0398554
KN9204-Specific	chr1D:544870-545401	TraesCS1D02G001100	0.635769	0.0262809
KN9204-Specific	chr1D:544870-545401	TraesCS1D02G001200	0.58006	0.0480275
KN9204-Specific	chr1D:544870-545401	TraesCS1D02G001300	0.610847	0.034864
KN9204-Specific	chr1D:544870-545401	TraesCS1D02G001400	0.594035	0.0416812
KN9204-Specific	chr1D:544870-545401	TraesCS1D02G002000	0.907974	4.44629e-05
KN9204-Specific	chr1D:544870-545401	TraesCS1D02G002063	0.646294	0.0231613
KN9204-Specific	chr1D:544870-545401	TraesCS1D02G002200	0.821281	0.00105478
KN9204-Specific	chr1D:544870-545401	TraesCS1D02G002300	0.623934	0.0301398
KN9204-Specific	chr1D:544870-545401	TraesCS1D02G002400	0.58257	0.0468403
KN9204-Specific	chr1D:547580-547840	TraesCS1D02G000906	0.608463	0.0357785
KN9204-Specific	chr1D:547580-547840	TraesCS1D02G002300	0.770798	0.00334051
KN9204-Specific	chr1D:547580-547840	TraesCS1D02G003300	0.745928	0.00534204
KN9204-Specific	chr1D:558764-559074	TraesCS1D02G000531	0.753324	0.00467163
KN9204-Specific	chr1D:558764-559074	TraesCS1D02G000567	0.765547	0.00370541
KN9204-Specific	chr1D:558764-559074	TraesCS1D02G000582	0.753354	0.00466904
KN9204-Specific	chr1D:558764-559074	TraesCS1D02G000906	0.958513	9.02656e-07
KN9204-Specific	chr1D:558764-559074	TraesCS1D02G002000	0.66021	0.0194614
KN9204-Specific	chr1D:558764-559074	TraesCS1D02G002200	0.665599	0.0181517
KN9204-Specific	chr1D:559974-560315	TraesCS1D02G000200	0.65865	0.0198528
KN9204-Specific	chr1D:559974-560315	TraesCS1D02G000300	0.687083	0.0135648
KN9204-Specific	chr1D:559974-560315	TraesCS1D02G000531	0.893606	8.95833e-05
KN9204-Specific	chr1D:559974-560315	TraesCS1D02G000567	0.896733	7.75895e-05
KN9204-Specific	chr1D:559974-560315	TraesCS1D02G000582	0.894407	8.63801e-05
KN9204-Specific	chr1D:559974-560315	TraesCS1D02G000700	0.643907	0.0238437
KN9204-Specific	chr1D:559974-560315	TraesCS1D02G000906	0.933598	9.0882e-06
KN9204-Specific	chr1D:559974-560315	TraesCS1D02G001000	0.714747	0.00899427
KN9204-Specific	chr1D:559974-560315	TraesCS1D02G001100	0.727288	0.00735321
KN9204-Specific	chr1D:559974-560315	TraesCS1D02G001200	0.685589	0.0138526
KN9204-Specific	chr1D:559974-560315	TraesCS1D02G001300	0.718406	0.0084898
KN9204-Specific	chr1D:559974-560315	TraesCS1D02G001400	0.69982	0.0112874
KN9204-Specific	chr1D:559974-560315	TraesCS1D02G002000	0.793862	0.00204972
KN9204-Specific	chr1D:559974-560315	TraesCS1D02G002063	0.759935	0.00412802
KN9204-Specific	chr1D:559974-560315	TraesCS1D02G002200	0.68941	0.0131255
KN9204-Specific	chr1D:563208-563426	TraesCS1D02G000531	0.805693	0.00155815
KN9204-Specific	chr1D:563208-563426	TraesCS1D02G000567	0.832538	0.000777336
KN9204-Specific	chr1D:563208-563426	TraesCS1D02G000582	0.806162	0.00154076
KN9204-Specific	chr1D:563208-563426	TraesCS1D02G000906	0.69968	0.0113107
KN9204-Specific	chr1D:563208-563426	TraesCS1D02G001100	0.598372	0.0398393
KN9204-Specific	chr1D:563208-563426	TraesCS1D02G002000	0.875973	0.000187015
KN9204-Specific	chr1D:563208-563426	TraesCS1D02G002063	0.612449	0.0342591
KN9204-Specific	chr1D:563208-563426	TraesCS1D02G002200	0.790162	0.00222549
KN9204-Specific	chr1D:563208-563426	TraesCS1D02G002300	0.677261	0.0155403
KN9204-Specific	chr1D:563208-563426	TraesCS1D02G002400	0.578936	0.0485654
KN9204-Specific	chr1D:563208-563426	TraesCS1D02G003300	0.585581	0.0454444
KN9204-Specific	chr1D:595715-596011	TraesCS1D02G002300	0.758	0.00428193
KN9204-Specific	chr1D:595715-596011	TraesCS1D02G002600	0.679457	0.0150813
KN9204-Specific	chr1D:595715-596011	TraesCS1D02G003300	0.709519	0.0097536
KN9204-Specific	chr1D:597877-597998	TraesCS1D02G002300	0.912442	3.49367e-05
KN9204-Specific	chr1D:597877-597998	TraesCS1D02G002600	0.711064	0.00952442
KN9204-Specific	chr1D:597877-597998	TraesCS1D02G003300	0.872656	0.000212164
KN9204-Specific	chr1D:601020-601678	TraesCS1D02G000906	0.584794	0.0458063
KN9204-Specific	chr1D:601020-601678	TraesCS1D02G002300	0.802806	0.0016687
KN9204-Specific	chr1D:601020-601678	TraesCS1D02G003300	0.78375	0.00255703
KN9204-Specific	chr1D:601777-602108	TraesCS1D02G002300	0.779882	0.0027745
KN9204-Specific	chr1D:601777-602108	TraesCS1D02G002600	0.725556	0.00756528
KN9204-Specific	chr1D:601777-602108	TraesCS1D02G003300	0.743784	0.00554937
KN9204-Specific	chr1D:602380-602515	TraesCS1D02G002300	0.771694	0.00328108
KN9204-Specific	chr1D:602380-602515	TraesCS1D02G002400	0.618612	0.0320015
KN9204-Specific	chr1D:602380-602515	TraesCS1D02G002600	0.644707	0.0236133
KN9204-Specific	chr1D:602380-602515	TraesCS1D02G002700	0.647526	0.0228145
KN9204-Specific	chr1D:602380-602515	TraesCS1D02G003300	0.626063	0.0294172
KN9204-Specific	chr1D:603214-603477	TraesCS1D02G002300	0.867739	0.000254211
KN9204-Specific	chr1D:603214-603477	TraesCS1D02G003300	0.838433	0.00065665
KN9204-Specific	chr1D:624648-624999	TraesCS1D02G002300	0.876281	0.000184804
KN9204-Specific	chr1D:624648-624999	TraesCS1D02G002600	0.781374	0.00268901
KN9204-Specific	chr1D:624648-624999	TraesCS1D02G003300	0.830712	0.000817986
KN9204-Specific	chr1D:724369-724715	TraesCS1D02G002300	0.725905	0.00752223
KN9204-Specific	chr1D:724369-724715	TraesCS1D02G002600	0.634764	0.0265937
KN9204-Specific	chr1D:724369-724715	TraesCS1D02G003300	0.743248	0.00560204
KN9204-Specific	chr1D:785296-785475	TraesCS1D02G002300	0.725166	0.00761364
KN9204-Specific	chr1D:785296-785475	TraesCS1D02G002600	0.773303	0.00317639
KN9204-Specific	chr1D:785296-785475	TraesCS1D02G003300	0.729154	0.00712965
KN9204-Specific	chr1D:2922520-2922780	TraesCS1D02G005500	0.62782	0.0288306
KN9204-Specific	chr1D:3100857-3101263	TraesCS1D02G006900	0.624354	0.0299963
KN9204-Specific	chr1D:3107940-3108725	TraesCS1D02G006800	0.669332	0.0172832
KN9204-Specific	chr1D:3107940-3108725	TraesCS1D02G006900	0.684967	0.0139738
KN9204-Specific	chr1D:3119285-3119397	TraesCS1D02G006800	0.640883	0.0247294
KN9204-Specific	chr1D:3119285-3119397	TraesCS1D02G006900	0.720426	0.00822052
KN9204-Specific	chr1D:3424117-3424401	TraesCS1D02G006800	0.656325	0.0204473
KN9204-Specific	chr1D:3424117-3424401	TraesCS1D02G006900	0.621154	0.0311022
KN9204-Specific	chr1D:3435973-3436428	TraesCS1D02G006400	0.716373	0.00876735
KN9204-Specific	chr1D:3435973-3436428	TraesCS1D02G006600	0.619596	0.0316513
KN9204-Specific	chr1D:3435973-3436428	TraesCS1D02G006800	0.814488	0.00125569
KN9204-Specific	chr1D:3435973-3436428	TraesCS1D02G006900	0.700318	0.0112045
KN9204-Specific	chr1D:3435973-3436428	TraesCS1D02G007200	0.591852	0.0426311
KN9204-Specific	chr1D:3435973-3436428	TraesCS1D02G007300	0.583464	0.0464226
KN9204-Specific	chr1D:3435973-3436428	TraesCS1D02G007500	0.69584	0.0119658
KN9204-Specific	chr1D:3441992-3442573	TraesCS1D02G006800	0.601647	0.0384871
KN9204-Specific	chr1D:3441992-3442573	TraesCS1D02G006900	0.683813	0.0142007
KN9204-Specific	chr1D:3443602-3443714	TraesCS1D02G006800	0.636715	0.0259886
KN9204-Specific	chr1D:3443602-3443714	TraesCS1D02G006900	0.699236	0.0113851
KN9204-Specific	chr1D:3631330-3631695	TraesCS1D02G006800	0.580318	0.0479045
KN9204-Specific	chr1D:3631330-3631695	TraesCS1D02G006900	0.728285	0.00723307
KN9204-Specific	chr1D:3631330-3631695	TraesCS1D02G007800	0.78046	0.00274114
KN9204-Specific	chr1D:3631330-3631695	TraesCS1D02G007900	0.752859	0.00471179
KN9204-Specific	chr1D:3631330-3631695	TraesCS1D02G008000	0.659767	0.0195719
KN9204-Specific	chr1D:3631330-3631695	TraesCS1D02G008100	0.911348	3.71033e-05
KN9204-Specific	chr1D:3631902-3632095	TraesCS1D02G007800	0.793665	0.00205883
KN9204-Specific	chr1D:3631902-3632095	TraesCS1D02G008100	0.76182	0.00398224
KN9204-Specific	chr1D:3697029-3697178	TraesCS1D02G006600	0.654986	0.0207954
KN9204-Specific	chr1D:3697029-3697178	TraesCS1D02G006800	0.868055	0.000251331
KN9204-Specific	chr1D:3697029-3697178	TraesCS1D02G006900	0.733096	0.0066743
KN9204-Specific	chr1D:3697029-3697178	TraesCS1D02G007000	0.581787	0.0472085
KN9204-Specific	chr1D:3697029-3697178	TraesCS1D02G007200	0.629297	0.0283439
KN9204-Specific	chr1D:3697029-3697178	TraesCS1D02G007300	0.620125	0.0314639
KN9204-Specific	chr1D:3697029-3697178	TraesCS1D02G007500	0.743196	0.00560723
KN9204-Specific	chr1D:3697029-3697178	TraesCS1D02G007800	0.582363	0.0469374
KN9204-Specific	chr1D:3697029-3697178	TraesCS1D02G008000	0.639161	0.0252442
KN9204-Specific	chr1D:3697029-3697178	TraesCS1D02G008100	0.772	0.00326101
KN9204-Specific	chr1D:3697029-3697178	TraesCS1D02G008200	0.676617	0.0156768
KN9204-Specific	chr1D:3697029-3697178	TraesCS1D02G008300	0.704415	0.0105399
KN9204-Specific	chr1D:3715781-3716209	TraesCS1D02G006900	0.676367	0.0157301
KN9204-Specific	chr1D:3715781-3716209	TraesCS1D02G007800	0.898656	7.0866e-05
KN9204-Specific	chr1D:3715781-3716209	TraesCS1D02G007900	0.742023	0.00572401
KN9204-Specific	chr1D:3715781-3716209	TraesCS1D02G008000	0.587095	0.0447532
KN9204-Specific	chr1D:3715781-3716209	TraesCS1D02G008100	0.967886	2.5488e-07
KN9204-Specific	chr1D:3715781-3716209	TraesCS1D02G008200	0.704644	0.0105037
KN9204-Specific	chr1D:3715781-3716209	TraesCS1D02G008300	0.709534	0.00975137
KN9204-Specific	chr1D:3716466-3716610	TraesCS1D02G006900	0.626567	0.0292482
KN9204-Specific	chr1D:3716466-3716610	TraesCS1D02G007800	0.604558	0.0373129
KN9204-Specific	chr1D:3716466-3716610	TraesCS1D02G008100	0.809225	0.00143065
KN9204-Specific	chr1D:3716466-3716610	TraesCS1D02G008200	0.645657	0.023342
KN9204-Specific	chr1D:3716466-3716610	TraesCS1D02G008300	0.655172	0.0207468
KN9204-Specific	chr1D:3770058-3770378	TraesCS1D02G007800	0.79823	0.00185615
KN9204-Specific	chr1D:3770058-3770378	TraesCS1D02G008100	0.756071	0.00443957
KN9204-Specific	chr1D:3770058-3770378	TraesCS1D02G008200	0.586348	0.0450931
KN9204-Specific	chr1D:3770058-3770378	TraesCS1D02G008300	0.582743	0.0467593
KN9204-Specific	chr1D:3775363-3775932	TraesCS1D02G006900	0.633047	0.0271347
KN9204-Specific	chr1D:3775363-3775932	TraesCS1D02G007800	0.902585	5.85511e-05
KN9204-Specific	chr1D:3775363-3775932	TraesCS1D02G007900	0.700241	0.0112172
KN9204-Specific	chr1D:3775363-3775932	TraesCS1D02G008100	0.951699	1.9088e-06
KN9204-Specific	chr1D:3775363-3775932	TraesCS1D02G008200	0.656118	0.0205009
KN9204-Specific	chr1D:3775363-3775932	TraesCS1D02G008300	0.662787	0.0188266
KN9204-Specific	chr1D:3792698-3792829	TraesCS1D02G006900	0.697432	0.0116909
KN9204-Specific	chr1D:3792698-3792829	TraesCS1D02G007800	0.805014	0.00158363
KN9204-Specific	chr1D:3792698-3792829	TraesCS1D02G007900	0.700333	0.011202
KN9204-Specific	chr1D:3792698-3792829	TraesCS1D02G008000	0.599861	0.0392205
KN9204-Specific	chr1D:3792698-3792829	TraesCS1D02G008100	0.892664	9.34683e-05
KN9204-Specific	chr1D:3792698-3792829	TraesCS1D02G008200	0.746773	0.005262
KN9204-Specific	chr1D:3792698-3792829	TraesCS1D02G008300	0.743988	0.00552934
KN9204-Specific	chr1D:3792892-3793111	TraesCS1D02G006800	0.850658	0.000452784
KN9204-Specific	chr1D:3792892-3793111	TraesCS1D02G006900	0.593573	0.0418807
KN9204-Specific	chr1D:3792892-3793111	TraesCS1D02G007000	0.585469	0.0454958
KN9204-Specific	chr1D:3792892-3793111	TraesCS1D02G007200	0.699162	0.0113976
KN9204-Specific	chr1D:3792892-3793111	TraesCS1D02G007300	0.690722	0.0128823
KN9204-Specific	chr1D:3792892-3793111	TraesCS1D02G007500	0.802687	0.00167341
KN9204-Specific	chr1D:3792892-3793111	TraesCS1D02G007900	0.604483	0.0373429
KN9204-Specific	chr1D:3792892-3793111	TraesCS1D02G008100	0.729791	0.00705453
KN9204-Specific	chr1D:3840887-3841262	TraesCS1D02G007400	0.803262	0.00165088
KN9204-Specific	chr1D:3849019-3849154	TraesCS1D02G007800	0.746291	0.00530759
KN9204-Specific	chr1D:3849019-3849154	TraesCS1D02G007900	0.601581	0.0385139
KN9204-Specific	chr1D:3849019-3849154	TraesCS1D02G008100	0.881005	0.000153378
KN9204-Specific	chr1D:3849224-3849411	TraesCS1D02G007800	0.680685	0.014829
KN9204-Specific	chr1D:3849224-3849411	TraesCS1D02G007900	0.590178	0.0433697
KN9204-Specific	chr1D:3849224-3849411	TraesCS1D02G008100	0.835759	0.000709445
KN9204-Specific	chr1D:3854310-3855225	TraesCS1D02G006900	0.608717	0.03568
KN9204-Specific	chr1D:3854310-3855225	TraesCS1D02G007800	0.801329	0.00172754
KN9204-Specific	chr1D:3854310-3855225	TraesCS1D02G007900	0.607	0.036348
KN9204-Specific	chr1D:3854310-3855225	TraesCS1D02G008100	0.902165	5.97801e-05
KN9204-Specific	chr1D:3854310-3855225	TraesCS1D02G008200	0.613241	0.0339628
KN9204-Specific	chr1D:3854310-3855225	TraesCS1D02G008300	0.624376	0.0299885
KN9204-Specific	chr1D:3863988-3864829	TraesCS1D02G006900	0.585782	0.0453518
KN9204-Specific	chr1D:3863988-3864829	TraesCS1D02G007800	0.889793	0.000106122
KN9204-Specific	chr1D:3863988-3864829	TraesCS1D02G007900	0.689751	0.0130619
KN9204-Specific	chr1D:3863988-3864829	TraesCS1D02G008100	0.965869	3.44435e-07
KN9204-Specific	chr1D:3863988-3864829	TraesCS1D02G008200	0.606235	0.0366484
KN9204-Specific	chr1D:3863988-3864829	TraesCS1D02G008300	0.614205	0.0336046
KN9204-Specific	chr1D:3875170-3875487	TraesCS1D02G006800	0.659208	0.019712
KN9204-Specific	chr1D:3875170-3875487	TraesCS1D02G006900	0.689153	0.0131735
KN9204-Specific	chr1D:3875170-3875487	TraesCS1D02G007800	0.849422	0.000470797
KN9204-Specific	chr1D:3875170-3875487	TraesCS1D02G007900	0.714225	0.00906802
KN9204-Specific	chr1D:3875170-3875487	TraesCS1D02G008000	0.601435	0.0385737
KN9204-Specific	chr1D:3875170-3875487	TraesCS1D02G008100	0.965771	3.49391e-07
KN9204-Specific	chr1D:3875170-3875487	TraesCS1D02G008200	0.683589	0.014245
KN9204-Specific	chr1D:3875170-3875487	TraesCS1D02G008300	0.697911	0.0116091
KN9204-Specific	chr1D:3878011-3878224	TraesCS1D02G006800	0.721422	0.0080901
KN9204-Specific	chr1D:3878011-3878224	TraesCS1D02G006900	0.576717	0.0496408
KN9204-Specific	chr1D:3878011-3878224	TraesCS1D02G007500	0.6285	0.0286056
KN9204-Specific	chr1D:3878011-3878224	TraesCS1D02G007800	0.726377	0.00746417
KN9204-Specific	chr1D:3878011-3878224	TraesCS1D02G007900	0.590273	0.0433275
KN9204-Specific	chr1D:3878011-3878224	TraesCS1D02G008100	0.846491	0.000515763
KN9204-Specific	chr1D:3878240-3878647	TraesCS1D02G007800	0.906468	4.80968e-05
KN9204-Specific	chr1D:3878240-3878647	TraesCS1D02G007900	0.637508	0.0257456
KN9204-Specific	chr1D:3878240-3878647	TraesCS1D02G008100	0.904649	5.27922e-05
KN9204-Specific	chr1D:3893677-3893813	TraesCS1D02G007800	0.895248	8.31181e-05
KN9204-Specific	chr1D:3893677-3893813	TraesCS1D02G007900	0.640431	0.0248638
KN9204-Specific	chr1D:3893677-3893813	TraesCS1D02G008100	0.941419	4.92219e-06
KN9204-Specific	chr1D:3894009-3894911	TraesCS1D02G007800	0.867072	0.000260379
KN9204-Specific	chr1D:3894009-3894911	TraesCS1D02G007900	0.597664	0.0401357
KN9204-Specific	chr1D:3894009-3894911	TraesCS1D02G008100	0.872118	0.000216475
KN9204-Specific	chr1D:3979689-3979961	TraesCS1D02G007800	0.903866	5.49219e-05
KN9204-Specific	chr1D:3979689-3979961	TraesCS1D02G007900	0.618405	0.0320755
KN9204-Specific	chr1D:3979689-3979961	TraesCS1D02G008100	0.793159	0.00208229
KN9204-Specific	chr1D:3982771-3983441	TraesCS1D02G007800	0.92087	2.13695e-05
KN9204-Specific	chr1D:3982771-3983441	TraesCS1D02G007900	0.654755	0.0208559
KN9204-Specific	chr1D:3982771-3983441	TraesCS1D02G008100	0.913771	3.24389e-05
KN9204-Specific	chr1D:3982771-3983441	TraesCS1D02G008200	0.608751	0.035667
KN9204-Specific	chr1D:3982771-3983441	TraesCS1D02G008300	0.607172	0.0362807
KN9204-Specific	chr1D:3990503-3990639	TraesCS1D02G007800	0.724603	0.00768393
KN9204-Specific	chr1D:3990503-3990639	TraesCS1D02G008100	0.742631	0.00566327
KN9204-Specific	chr1D:3990993-3992123	TraesCS1D02G007800	0.929552	1.2131e-05
KN9204-Specific	chr1D:3990993-3992123	TraesCS1D02G007900	0.639109	0.0252596
KN9204-Specific	chr1D:3990993-3992123	TraesCS1D02G008100	0.890177	0.000104355
KN9204-Specific	chr1D:3990993-3992123	TraesCS1D02G008200	0.617134	0.032533
KN9204-Specific	chr1D:3990993-3992123	TraesCS1D02G008300	0.627073	0.029079
KN9204-Specific	chr1D:3996494-3996844	TraesCS1D02G007800	0.861733	0.000314088
KN9204-Specific	chr1D:3996494-3996844	TraesCS1D02G007900	0.624429	0.0299706
KN9204-Specific	chr1D:3996494-3996844	TraesCS1D02G008100	0.885701	0.000126439
KN9204-Specific	chr1D:3996494-3996844	TraesCS1D02G008200	0.640699	0.0247841
KN9204-Specific	chr1D:3996494-3996844	TraesCS1D02G008300	0.652457	0.0214646
KN9204-Specific	chr1D:3997624-3998162	TraesCS1D02G007800	0.751365	0.00484267
KN9204-Specific	chr1D:3997624-3998162	TraesCS1D02G007900	0.584268	0.0460495
KN9204-Specific	chr1D:3997624-3998162	TraesCS1D02G008100	0.883112	0.000140788
KN9204-Specific	chr1D:3997624-3998162	TraesCS1D02G008200	0.619572	0.0316598
KN9204-Specific	chr1D:3997624-3998162	TraesCS1D02G008300	0.629776	0.0281871
KN9204-Specific	chr1D:4002026-4003136	TraesCS1D02G007800	0.925803	1.56208e-05
KN9204-Specific	chr1D:4002026-4003136	TraesCS1D02G007900	0.731615	0.0068427
KN9204-Specific	chr1D:4002026-4003136	TraesCS1D02G008100	0.973949	9.04607e-08
KN9204-Specific	chr1D:4002026-4003136	TraesCS1D02G008200	0.643816	0.0238701
KN9204-Specific	chr1D:4002026-4003136	TraesCS1D02G008300	0.649282	0.022327
KN9204-Specific	chr1D:4008417-4009164	TraesCS1D02G007800	0.821142	0.00105863
KN9204-Specific	chr1D:4008417-4009164	TraesCS1D02G007900	0.694138	0.0122651
KN9204-Specific	chr1D:4008417-4009164	TraesCS1D02G008100	0.938992	6.0048e-06
KN9204-Specific	chr1D:4008417-4009164	TraesCS1D02G008200	0.664682	0.0183699
KN9204-Specific	chr1D:4008417-4009164	TraesCS1D02G008300	0.675953	0.0158185
KN9204-Specific	chr1D:4014846-4015246	TraesCS1D02G007800	0.92434	1.71795e-05
KN9204-Specific	chr1D:4014846-4015246	TraesCS1D02G007900	0.7048	0.0104791
KN9204-Specific	chr1D:4014846-4015246	TraesCS1D02G008100	0.960788	6.83551e-07
KN9204-Specific	chr1D:4014846-4015246	TraesCS1D02G008200	0.628647	0.0285571
KN9204-Specific	chr1D:4014846-4015246	TraesCS1D02G008300	0.640502	0.0248425
KN9204-Specific	chr1D:4035468-4035700	TraesCS1D02G007800	0.78807	0.0023298
KN9204-Specific	chr1D:4035468-4035700	TraesCS1D02G008100	0.822033	0.00103417
KN9204-Specific	chr1D:4035731-4035937	TraesCS1D02G007800	0.778233	0.00287135
KN9204-Specific	chr1D:4035731-4035937	TraesCS1D02G008100	0.64358	0.0239383
KN9204-Specific	chr1D:4036355-4036488	TraesCS1D02G007800	0.812237	0.0013284
KN9204-Specific	chr1D:4036355-4036488	TraesCS1D02G007900	0.64707	0.0229423
KN9204-Specific	chr1D:4036355-4036488	TraesCS1D02G008100	0.880758	0.000154907
KN9204-Specific	chr1D:4036355-4036488	TraesCS1D02G008200	0.67552	0.0159115
KN9204-Specific	chr1D:4036355-4036488	TraesCS1D02G008300	0.67578	0.0158556
KN9204-Specific	chr1D:4038239-4038611	TraesCS1D02G007800	0.837305	0.000678544
KN9204-Specific	chr1D:4038239-4038611	TraesCS1D02G007900	0.594999	0.0412667
KN9204-Specific	chr1D:4038239-4038611	TraesCS1D02G008100	0.822812	0.00101314
KN9204-Specific	chr1D:4045884-4046058	TraesCS1D02G007800	0.841262	0.000604163
KN9204-Specific	chr1D:4045884-4046058	TraesCS1D02G007900	0.60582	0.036812
KN9204-Specific	chr1D:4045884-4046058	TraesCS1D02G008100	0.885991	0.000124908
KN9204-Specific	chr1D:4046310-4047582	TraesCS1D02G007800	0.809299	0.00142807
KN9204-Specific	chr1D:4046310-4047582	TraesCS1D02G007900	0.652529	0.0214454
KN9204-Specific	chr1D:4046310-4047582	TraesCS1D02G008100	0.91234	3.51342e-05
KN9204-Specific	chr1D:4046310-4047582	TraesCS1D02G008200	0.641625	0.0245098
KN9204-Specific	chr1D:4046310-4047582	TraesCS1D02G008300	0.646904	0.0229891
KN9204-Specific	chr1D:4048934-4049207	TraesCS1D02G007800	0.85199	0.000433964
KN9204-Specific	chr1D:4048934-4049207	TraesCS1D02G007900	0.630504	0.0279503
KN9204-Specific	chr1D:4048934-4049207	TraesCS1D02G008100	0.915258	2.98126e-05
KN9204-Specific	chr1D:4048934-4049207	TraesCS1D02G008200	0.63038	0.0279908
KN9204-Specific	chr1D:4048934-4049207	TraesCS1D02G008300	0.633337	0.0270429
KN9204-Specific	chr1D:4049624-4049808	TraesCS1D02G007800	0.791695	0.0021513
KN9204-Specific	chr1D:4049624-4049808	TraesCS1D02G008100	0.706838	0.010161
KN9204-Specific	chr1D:4055878-4056170	TraesCS1D02G007800	0.818958	0.00112048
KN9204-Specific	chr1D:4055878-4056170	TraesCS1D02G008100	0.856601	0.000373478
KN9204-Specific	chr1D:4058389-4058759	TraesCS1D02G007800	0.869735	0.000236421
KN9204-Specific	chr1D:4058389-4058759	TraesCS1D02G008100	0.751896	0.00479586
KN9204-Specific	chr1D:4058869-4059600	TraesCS1D02G007800	0.87765	0.000175219
KN9204-Specific	chr1D:4058869-4059600	TraesCS1D02G008100	0.782601	0.00262024
KN9204-Specific	chr1D:4063626-4063763	TraesCS1D02G007400	0.59334	0.0419821
KN9204-Specific	chr1D:4063626-4063763	TraesCS1D02G007800	0.744862	0.00544441
KN9204-Specific	chr1D:4116971-4117608	TraesCS1D02G007800	0.875049	0.000193774
KN9204-Specific	chr1D:4116971-4117608	TraesCS1D02G007900	0.665889	0.0180831
KN9204-Specific	chr1D:4116971-4117608	TraesCS1D02G008100	0.941257	4.98901e-06
KN9204-Specific	chr1D:4116971-4117608	TraesCS1D02G008200	0.624329	0.0300049
KN9204-Specific	chr1D:4116971-4117608	TraesCS1D02G008300	0.6304	0.0279842
KN9204-Specific	chr1D:4118121-4118390	TraesCS1D02G007500	0.579182	0.0484474
KN9204-Specific	chr1D:4118121-4118390	TraesCS1D02G007800	0.729534	0.00708481
KN9204-Specific	chr1D:4118121-4118390	TraesCS1D02G007900	0.724771	0.00766295
KN9204-Specific	chr1D:4118121-4118390	TraesCS1D02G008000	0.616587	0.0327309
KN9204-Specific	chr1D:4118121-4118390	TraesCS1D02G008100	0.911193	3.74192e-05
KN9204-Specific	chr1D:4118121-4118390	TraesCS1D02G008200	0.670952	0.0169159
KN9204-Specific	chr1D:4118121-4118390	TraesCS1D02G008300	0.689017	0.013199
KN9204-Specific	chr1D:4168710-4168893	TraesCS1D02G007800	0.785877	0.00244315
KN9204-Specific	chr1D:4168710-4168893	TraesCS1D02G007900	0.644906	0.0235563
KN9204-Specific	chr1D:4168710-4168893	TraesCS1D02G008100	0.907442	4.57222e-05
KN9204-Specific	chr1D:4171186-4171307	TraesCS1D02G007500	0.742943	0.00563222
KN9204-Specific	chr1D:4171186-4171307	TraesCS1D02G007800	0.690406	0.0129406
KN9204-Specific	chr1D:4171186-4171307	TraesCS1D02G007900	0.77693	0.00294974
KN9204-Specific	chr1D:4171186-4171307	TraesCS1D02G008000	0.730024	0.00702725
KN9204-Specific	chr1D:4171186-4171307	TraesCS1D02G008100	0.89082	0.000101452
KN9204-Specific	chr1D:4171186-4171307	TraesCS1D02G008200	0.746952	0.00524517
KN9204-Specific	chr1D:4171186-4171307	TraesCS1D02G008300	0.770773	0.00334223
KN9204-Specific	chr1D:4175634-4175873	TraesCS1D02G007800	0.744315	0.00549747
KN9204-Specific	chr1D:4175634-4175873	TraesCS1D02G007900	0.7727	0.00321532
KN9204-Specific	chr1D:4175634-4175873	TraesCS1D02G008000	0.714965	0.00896369
KN9204-Specific	chr1D:4175634-4175873	TraesCS1D02G008100	0.917069	2.68433e-05
KN9204-Specific	chr1D:4175634-4175873	TraesCS1D02G008200	0.809704	0.00141399
KN9204-Specific	chr1D:4175634-4175873	TraesCS1D02G008300	0.819358	0.00110894
KN9204-Specific	chr1D:4199365-4199486	TraesCS1D02G007800	0.782545	0.00262335
KN9204-Specific	chr1D:4199365-4199486	TraesCS1D02G007900	0.601101	0.0387104
KN9204-Specific	chr1D:4199365-4199486	TraesCS1D02G008100	0.862099	0.000310151
KN9204-Specific	chr1D:4200063-4200318	TraesCS1D02G007800	0.768311	0.00350976
KN9204-Specific	chr1D:4200063-4200318	TraesCS1D02G007900	0.657515	0.0201414
KN9204-Specific	chr1D:4200063-4200318	TraesCS1D02G008000	0.591251	0.0428951
KN9204-Specific	chr1D:4200063-4200318	TraesCS1D02G008100	0.915233	2.98559e-05
KN9204-Specific	chr1D:4200063-4200318	TraesCS1D02G008200	0.711165	0.00950953
KN9204-Specific	chr1D:4200063-4200318	TraesCS1D02G008300	0.713045	0.0092365
KN9204-Specific	chr1D:4201369-4202030	TraesCS1D02G007800	0.7945	0.00202053
KN9204-Specific	chr1D:4201369-4202030	TraesCS1D02G007900	0.64233	0.0243027
KN9204-Specific	chr1D:4201369-4202030	TraesCS1D02G008100	0.864973	0.000280557
KN9204-Specific	chr1D:4227784-4228237	TraesCS1D02G007800	0.926999	1.44313e-05
KN9204-Specific	chr1D:4227784-4228237	TraesCS1D02G007900	0.587812	0.0444285
KN9204-Specific	chr1D:4227784-4228237	TraesCS1D02G008100	0.849525	0.000469267
KN9204-Specific	chr1D:4228353-4228515	TraesCS1D02G007800	0.920634	2.16817e-05
KN9204-Specific	chr1D:4228353-4228515	TraesCS1D02G007900	0.701886	0.0109465
KN9204-Specific	chr1D:4228353-4228515	TraesCS1D02G008100	0.938518	6.23657e-06
KN9204-Specific	chr1D:4228353-4228515	TraesCS1D02G008200	0.686119	0.01375
KN9204-Specific	chr1D:4228353-4228515	TraesCS1D02G008300	0.685578	0.0138547
KN9204-Specific	chr1D:4229936-4230048	TraesCS1D02G007800	0.899973	6.653e-05
KN9204-Specific	chr1D:4229936-4230048	TraesCS1D02G007900	0.620285	0.0314076
KN9204-Specific	chr1D:4229936-4230048	TraesCS1D02G008100	0.919868	2.27182e-05
KN9204-Specific	chr1D:4230136-4230491	TraesCS1D02G007800	0.90321	5.67573e-05
KN9204-Specific	chr1D:4230136-4230491	TraesCS1D02G007900	0.605705	0.0368573
KN9204-Specific	chr1D:4230136-4230491	TraesCS1D02G008100	0.897601	7.44966e-05
KN9204-Specific	chr1D:4230602-4231363	TraesCS1D02G007800	0.895656	8.15704e-05
KN9204-Specific	chr1D:4230602-4231363	TraesCS1D02G007900	0.633254	0.0270691
KN9204-Specific	chr1D:4230602-4231363	TraesCS1D02G008100	0.926403	1.50153e-05
KN9204-Specific	chr1D:4230602-4231363	TraesCS1D02G008200	0.576155	0.0499156
KN9204-Specific	chr1D:4230602-4231363	TraesCS1D02G008300	0.576383	0.0498042
KN9204-Specific	chr1D:4233068-4233199	TraesCS1D02G007800	0.68546	0.0138778
KN9204-Specific	chr1D:4233068-4233199	TraesCS1D02G007900	0.673408	0.0163702
KN9204-Specific	chr1D:4233068-4233199	TraesCS1D02G008100	0.918424	2.47788e-05
KN9204-Specific	chr1D:4233068-4233199	TraesCS1D02G008200	0.685202	0.0139279
KN9204-Specific	chr1D:4233068-4233199	TraesCS1D02G008300	0.694402	0.0122183
KN9204-Specific	chr1D:4233564-4233747	TraesCS1D02G007800	0.810814	0.00137596
KN9204-Specific	chr1D:4233564-4233747	TraesCS1D02G007900	0.728656	0.0071888
KN9204-Specific	chr1D:4233564-4233747	TraesCS1D02G008100	0.954748	1.38485e-06
KN9204-Specific	chr1D:4233564-4233747	TraesCS1D02G008200	0.638879	0.0253291
KN9204-Specific	chr1D:4233564-4233747	TraesCS1D02G008300	0.650146	0.0220898
KN9204-Specific	chr1D:4241544-4242168	TraesCS1D02G007800	0.907521	4.55339e-05
KN9204-Specific	chr1D:4241544-4242168	TraesCS1D02G007900	0.670568	0.0170024
KN9204-Specific	chr1D:4241544-4242168	TraesCS1D02G008100	0.940115	5.48278e-06
KN9204-Specific	chr1D:4241544-4242168	TraesCS1D02G008200	0.667598	0.0176827
KN9204-Specific	chr1D:4241544-4242168	TraesCS1D02G008300	0.676397	0.0157237
KN9204-Specific	chr1D:4243046-4244465	TraesCS1D02G007800	0.931936	1.02548e-05
KN9204-Specific	chr1D:4243046-4244465	TraesCS1D02G007900	0.671239	0.0168517
KN9204-Specific	chr1D:4243046-4244465	TraesCS1D02G008100	0.953105	1.65061e-06
KN9204-Specific	chr1D:4251739-4252266	TraesCS1D02G007800	0.909184	4.17033e-05
KN9204-Specific	chr1D:4251739-4252266	TraesCS1D02G007900	0.735675	0.00638843
KN9204-Specific	chr1D:4251739-4252266	TraesCS1D02G008000	0.594344	0.0415478
KN9204-Specific	chr1D:4251739-4252266	TraesCS1D02G008100	0.970401	1.70244e-07
KN9204-Specific	chr1D:4251739-4252266	TraesCS1D02G008200	0.681233	0.0147175
KN9204-Specific	chr1D:4251739-4252266	TraesCS1D02G008300	0.690443	0.0129337
KN9204-Specific	chr1D:4271216-4271732	TraesCS1D02G007800	0.900276	6.55631e-05
KN9204-Specific	chr1D:4271216-4271732	TraesCS1D02G007900	0.582848	0.0467103
KN9204-Specific	chr1D:4271216-4271732	TraesCS1D02G008100	0.81384	0.00127629
KN9204-Specific	chr1D:4274445-4274748	TraesCS1D02G007800	0.842003	0.000590981
KN9204-Specific	chr1D:4274445-4274748	TraesCS1D02G007900	0.706628	0.0101934
KN9204-Specific	chr1D:4274445-4274748	TraesCS1D02G008000	0.69035	0.0129509
KN9204-Specific	chr1D:4274445-4274748	TraesCS1D02G008100	0.886573	0.000121875
KN9204-Specific	chr1D:4274445-4274748	TraesCS1D02G008200	0.676876	0.0156218
KN9204-Specific	chr1D:4274445-4274748	TraesCS1D02G008300	0.678641	0.0152507
KN9204-Specific	chr1D:4276771-4277185	TraesCS1D02G007800	0.842857	0.000576037
KN9204-Specific	chr1D:4276771-4277185	TraesCS1D02G007900	0.667853	0.0176236
KN9204-Specific	chr1D:4276771-4277185	TraesCS1D02G008100	0.94042	5.34709e-06
KN9204-Specific	chr1D:4276771-4277185	TraesCS1D02G008200	0.623337	0.0303446
KN9204-Specific	chr1D:4276771-4277185	TraesCS1D02G008300	0.637087	0.0258744
KN9204-Specific	chr1D:4296704-4297371	TraesCS1D02G007800	0.900094	6.61437e-05
KN9204-Specific	chr1D:4296704-4297371	TraesCS1D02G007900	0.705497	0.0103694
KN9204-Specific	chr1D:4296704-4297371	TraesCS1D02G008100	0.951603	1.9274e-06
KN9204-Specific	chr1D:4296704-4297371	TraesCS1D02G008200	0.646225	0.0231807
KN9204-Specific	chr1D:4296704-4297371	TraesCS1D02G008300	0.649351	0.0223079
KN9204-Specific	chr1D:4298517-4298679	TraesCS1D02G007800	0.862491	0.000305979
KN9204-Specific	chr1D:4298517-4298679	TraesCS1D02G008100	0.829069	0.000855956
KN9204-Specific	chr1D:4298517-4298679	TraesCS1D02G008200	0.595631	0.0409965
KN9204-Specific	chr1D:4298517-4298679	TraesCS1D02G008300	0.588373	0.0441761
KN9204-Specific	chr1D:4299703-4299949	TraesCS1D02G007800	0.803554	0.00163951
KN9204-Specific	chr1D:4299703-4299949	TraesCS1D02G007900	0.668275	0.017526
KN9204-Specific	chr1D:4299703-4299949	TraesCS1D02G008100	0.906691	4.75439e-05
KN9204-Specific	chr1D:4299703-4299949	TraesCS1D02G008200	0.613823	0.033746
KN9204-Specific	chr1D:4299703-4299949	TraesCS1D02G008300	0.629104	0.0284071
KN9204-Specific	chr1D:4349670-4350073	TraesCS1D02G007800	0.857272	0.000365252
KN9204-Specific	chr1D:4349670-4350073	TraesCS1D02G008100	0.856318	0.00037698
KN9204-Specific	chr1D:4350743-4351168	TraesCS1D02G007800	0.909228	4.1606e-05
KN9204-Specific	chr1D:4350743-4351168	TraesCS1D02G008100	0.768179	0.00351892
KN9204-Specific	chr1D:4351458-4351657	TraesCS1D02G007800	0.823929	0.000983554
KN9204-Specific	chr1D:4351458-4351657	TraesCS1D02G008100	0.617315	0.0324674
KN9204-Specific	chr1D:4351458-4351657	TraesCS1D02G009000	0.652809	0.0213705
KN9204-Specific	chr1D:4354357-4355021	TraesCS1D02G007800	0.844006	0.000556421
KN9204-Specific	chr1D:4354357-4355021	TraesCS1D02G007900	0.685507	0.0138685
KN9204-Specific	chr1D:4354357-4355021	TraesCS1D02G008000	0.612283	0.0343215
KN9204-Specific	chr1D:4354357-4355021	TraesCS1D02G008100	0.93995	5.55709e-06
KN9204-Specific	chr1D:4354357-4355021	TraesCS1D02G008200	0.723182	0.00786337
KN9204-Specific	chr1D:4354357-4355021	TraesCS1D02G008300	0.730533	0.00696782
KN9204-Specific	chr1D:4356442-4356728	TraesCS1D02G007800	0.803248	0.00165141
KN9204-Specific	chr1D:4356442-4356728	TraesCS1D02G007900	0.624964	0.0297885
KN9204-Specific	chr1D:4356442-4356728	TraesCS1D02G008100	0.856718	0.000372023
KN9204-Specific	chr1D:4367395-4367718	TraesCS1D02G007800	0.729632	0.00707329
KN9204-Specific	chr1D:4367395-4367718	TraesCS1D02G008100	0.844685	0.000545066
KN9204-Specific	chr1D:4367395-4367718	TraesCS1D02G008200	0.617748	0.0323114
KN9204-Specific	chr1D:4367395-4367718	TraesCS1D02G008300	0.633214	0.0270816
KN9204-Specific	chr1D:4368019-4368271	TraesCS1D02G007800	0.66911	0.017334
KN9204-Specific	chr1D:4368019-4368271	TraesCS1D02G007900	0.638851	0.0253376
KN9204-Specific	chr1D:4368019-4368271	TraesCS1D02G008100	0.845437	0.00053271
KN9204-Specific	chr1D:4368019-4368271	TraesCS1D02G008200	0.611645	0.0345617
KN9204-Specific	chr1D:4368019-4368271	TraesCS1D02G008300	0.61865	0.0319878
KN9204-Specific	chr1D:4385659-4386769	TraesCS1D02G007800	0.834819	0.000728756
KN9204-Specific	chr1D:4385659-4386769	TraesCS1D02G007900	0.705846	0.0103149
KN9204-Specific	chr1D:4385659-4386769	TraesCS1D02G008000	0.684213	0.0141216
KN9204-Specific	chr1D:4385659-4386769	TraesCS1D02G008100	0.910159	3.95777e-05
KN9204-Specific	chr1D:4385659-4386769	TraesCS1D02G008200	0.789825	0.00224206
KN9204-Specific	chr1D:4385659-4386769	TraesCS1D02G008300	0.793458	0.00206839
KN9204-Specific	chr1D:4385659-4386769	TraesCS1D02G009192	0.954928	1.35796e-06
KN9204-Specific	chr1D:4399997-4400225	TraesCS1D02G007800	0.739932	0.00593682
KN9204-Specific	chr1D:4399997-4400225	TraesCS1D02G007900	0.608787	0.035653
KN9204-Specific	chr1D:4399997-4400225	TraesCS1D02G008100	0.858549	0.000349979
KN9204-Specific	chr1D:4399997-4400225	TraesCS1D02G008200	0.656982	0.020278
KN9204-Specific	chr1D:4399997-4400225	TraesCS1D02G008300	0.660257	0.0194496
KN9204-Specific	chr1D:4399997-4400225	TraesCS1D02G009192	0.886931	0.000120038
KN9204-Specific	chr1D:4400371-4400636	TraesCS1D02G007800	0.724469	0.00770079
KN9204-Specific	chr1D:4400371-4400636	TraesCS1D02G007900	0.660884	0.0192939
KN9204-Specific	chr1D:4400371-4400636	TraesCS1D02G008000	0.654634	0.0208876
KN9204-Specific	chr1D:4400371-4400636	TraesCS1D02G008100	0.874245	0.000199809
KN9204-Specific	chr1D:4400371-4400636	TraesCS1D02G008200	0.689878	0.0130383
KN9204-Specific	chr1D:4400371-4400636	TraesCS1D02G008300	0.711436	0.00946985
KN9204-Specific	chr1D:4400371-4400636	TraesCS1D02G009192	0.912902	3.40558e-05
KN9204-Specific	chr1D:4408089-4408425	TraesCS1D02G007800	0.696475	0.0118556
KN9204-Specific	chr1D:4408089-4408425	TraesCS1D02G007900	0.647925	0.022703
KN9204-Specific	chr1D:4408089-4408425	TraesCS1D02G008100	0.879733	0.00016139
KN9204-Specific	chr1D:4408089-4408425	TraesCS1D02G009192	0.853919	0.000407793
KN9204-Specific	chr1D:4408089-4408425	TraesCS1D02G009300	0.772902	0.00320223
KN9204-Specific	chr1D:4410269-4410636	TraesCS1D02G007800	0.733203	0.00666221
KN9204-Specific	chr1D:4410269-4410636	TraesCS1D02G008100	0.724739	0.00766691
KN9204-Specific	chr1D:4410269-4410636	TraesCS1D02G009192	0.734916	0.00647158
KN9204-Specific	chr1D:4432081-4432258	TraesCS1D02G007800	0.857745	0.000359539
KN9204-Specific	chr1D:4432081-4432258	TraesCS1D02G007900	0.648826	0.0224529
KN9204-Specific	chr1D:4432081-4432258	TraesCS1D02G008100	0.940718	5.21745e-06
KN9204-Specific	chr1D:4432081-4432258	TraesCS1D02G009192	0.925808	1.5616e-05
KN9204-Specific	chr1D:4432081-4432258	TraesCS1D02G009300	0.665624	0.0181457
KN9204-Specific	chr1D:4432608-4432924	TraesCS1D02G007800	0.912848	3.41583e-05
KN9204-Specific	chr1D:4432608-4432924	TraesCS1D02G007900	0.610401	0.0350339
KN9204-Specific	chr1D:4432608-4432924	TraesCS1D02G008100	0.881944	0.000147663
KN9204-Specific	chr1D:4432608-4432924	TraesCS1D02G008200	0.598557	0.0397618
KN9204-Specific	chr1D:4432608-4432924	TraesCS1D02G008300	0.595902	0.0408811
KN9204-Specific	chr1D:4432608-4432924	TraesCS1D02G009192	0.889661	0.000106737
KN9204-Specific	chr1D:4437617-4437844	TraesCS1D02G007800	0.777926	0.00288969
KN9204-Specific	chr1D:4437617-4437844	TraesCS1D02G007900	0.592575	0.0423146
KN9204-Specific	chr1D:4437617-4437844	TraesCS1D02G008100	0.866842	0.000262537
KN9204-Specific	chr1D:4437617-4437844	TraesCS1D02G009192	0.868693	0.000245581
KN9204-Specific	chr1D:4437617-4437844	TraesCS1D02G009300	0.652768	0.0213815
KN9204-Specific	chr1D:4439183-4439551	TraesCS1D02G007800	0.77382	0.00314331
KN9204-Specific	chr1D:4439183-4439551	TraesCS1D02G007900	0.730814	0.00693515
KN9204-Specific	chr1D:4439183-4439551	TraesCS1D02G008000	0.693388	0.0123988
KN9204-Specific	chr1D:4439183-4439551	TraesCS1D02G008100	0.944564	3.75551e-06
KN9204-Specific	chr1D:4439183-4439551	TraesCS1D02G008200	0.790954	0.00218695
KN9204-Specific	chr1D:4439183-4439551	TraesCS1D02G008300	0.79857	0.00184169
KN9204-Specific	chr1D:4439183-4439551	TraesCS1D02G009192	0.965483	3.64148e-07
KN9204-Specific	chr1D:4439948-4440075	TraesCS1D02G007800	0.83637	0.000697096
KN9204-Specific	chr1D:4439948-4440075	TraesCS1D02G007900	0.676815	0.0156347
KN9204-Specific	chr1D:4439948-4440075	TraesCS1D02G008100	0.939217	5.89746e-06
KN9204-Specific	chr1D:4439948-4440075	TraesCS1D02G008200	0.625987	0.0294428
KN9204-Specific	chr1D:4439948-4440075	TraesCS1D02G008300	0.630658	0.0279007
KN9204-Specific	chr1D:4439948-4440075	TraesCS1D02G009192	0.941394	4.93234e-06
KN9204-Specific	chr1D:4439948-4440075	TraesCS1D02G009300	0.613525	0.033857
KN9204-Specific	chr1D:4440671-4440783	TraesCS1D02G007800	0.766664	0.00362537
KN9204-Specific	chr1D:4440671-4440783	TraesCS1D02G008100	0.631896	0.0275019
KN9204-Specific	chr1D:4440671-4440783	TraesCS1D02G009192	0.606314	0.0366171
KN9204-Specific	chr1D:4440840-4441057	TraesCS1D02G007800	0.82335	0.000998799
KN9204-Specific	chr1D:4440840-4441057	TraesCS1D02G007900	0.708639	0.00988594
KN9204-Specific	chr1D:4440840-4441057	TraesCS1D02G008000	0.632357	0.0273544
KN9204-Specific	chr1D:4440840-4441057	TraesCS1D02G008100	0.958485	9.05734e-07
KN9204-Specific	chr1D:4440840-4441057	TraesCS1D02G008200	0.729061	0.00714067
KN9204-Specific	chr1D:4440840-4441057	TraesCS1D02G008300	0.736773	0.00626963
KN9204-Specific	chr1D:4440840-4441057	TraesCS1D02G009192	0.969363	2.01933e-07
KN9204-Specific	chr1D:4441905-4442160	TraesCS1D02G007800	0.805857	0.00155204
KN9204-Specific	chr1D:4441905-4442160	TraesCS1D02G007900	0.725183	0.00761154
KN9204-Specific	chr1D:4441905-4442160	TraesCS1D02G008000	0.618801	0.031934
KN9204-Specific	chr1D:4441905-4442160	TraesCS1D02G008100	0.953277	1.62102e-06
KN9204-Specific	chr1D:4441905-4442160	TraesCS1D02G008200	0.686949	0.0135905
KN9204-Specific	chr1D:4441905-4442160	TraesCS1D02G008300	0.702056	0.0109189
KN9204-Specific	chr1D:4441905-4442160	TraesCS1D02G009192	0.963904	4.5418e-07
KN9204-Specific	chr1D:4528267-4528549	TraesCS1D02G008100	0.9288	1.27762e-05
KN9204-Specific	chr1D:4528267-4528549	TraesCS1D02G008200	0.650631	0.0219576
KN9204-Specific	chr1D:4528267-4528549	TraesCS1D02G008300	0.657333	0.0201879
KN9204-Specific	chr1D:4528267-4528549	TraesCS1D02G009192	0.950246	2.20823e-06
KN9204-Specific	chr1D:4532189-4533257	TraesCS1D02G008100	0.966394	3.19061e-07
KN9204-Specific	chr1D:4532189-4533257	TraesCS1D02G008200	0.652204	0.0215323
KN9204-Specific	chr1D:4532189-4533257	TraesCS1D02G008300	0.656992	0.0202755
KN9204-Specific	chr1D:4532189-4533257	TraesCS1D02G009192	0.961869	5.95477e-07
KN9204-Specific	chr1D:4552427-4552539	TraesCS1D02G008100	0.778399	0.00286148
KN9204-Specific	chr1D:4552427-4552539	TraesCS1D02G008200	0.576	0.0499915
KN9204-Specific	chr1D:4552427-4552539	TraesCS1D02G008300	0.5767	0.049649
KN9204-Specific	chr1D:4552427-4552539	TraesCS1D02G009192	0.827458	0.000894476
KN9204-Specific	chr1D:4553336-4553571	TraesCS1D02G008100	0.755632	0.00447609
KN9204-Specific	chr1D:4553336-4553571	TraesCS1D02G009192	0.787978	0.00233447
KN9204-Specific	chr1D:4554081-4554284	TraesCS1D02G008100	0.906379	4.83186e-05
KN9204-Specific	chr1D:4554081-4554284	TraesCS1D02G008200	0.705819	0.0103191
KN9204-Specific	chr1D:4554081-4554284	TraesCS1D02G008300	0.712659	0.009292
KN9204-Specific	chr1D:4554081-4554284	TraesCS1D02G009192	0.934029	8.80329e-06
KN9204-Specific	chr1D:4554735-4555043	TraesCS1D02G008100	0.810995	0.00136983
KN9204-Specific	chr1D:4554735-4555043	TraesCS1D02G009192	0.821835	0.00103957
KN9204-Specific	chr1D:4569789-4570200	TraesCS1D02G008100	0.812642	0.00131507
KN9204-Specific	chr1D:4569789-4570200	TraesCS1D02G009192	0.786088	0.00243208
KN9204-Specific	chr1D:4569789-4570200	TraesCS1D02G009300	0.583882	0.0462282
KN9204-Specific	chr1D:4572941-4573145	TraesCS1D02G008100	0.918021	2.53792e-05
KN9204-Specific	chr1D:4572941-4573145	TraesCS1D02G008200	0.576371	0.0498098
KN9204-Specific	chr1D:4572941-4573145	TraesCS1D02G008300	0.593333	0.0419848
KN9204-Specific	chr1D:4572941-4573145	TraesCS1D02G009192	0.932661	9.73216e-06
KN9204-Specific	chr1D:4575356-4575543	TraesCS1D02G008100	0.890442	0.000103149
KN9204-Specific	chr1D:4575356-4575543	TraesCS1D02G008200	0.674683	0.016092
KN9204-Specific	chr1D:4575356-4575543	TraesCS1D02G008300	0.690045	0.0130074
KN9204-Specific	chr1D:4575356-4575543	TraesCS1D02G009192	0.930742	1.11631e-05
KN9204-Specific	chr1D:4594325-4595120	TraesCS1D02G008200	0.690034	0.0130093
KN9204-Specific	chr1D:4594325-4595120	TraesCS1D02G008300	0.690941	0.0128421
KN9204-Specific	chr1D:4594325-4595120	TraesCS1D02G009192	0.944677	3.71784e-06
KN9204-Specific	chr1D:4596383-4596589	TraesCS1D02G008300	0.581166	0.0475016
KN9204-Specific	chr1D:4596383-4596589	TraesCS1D02G009192	0.899121	6.93099e-05
KN9204-Specific	chr1D:4596383-4596589	TraesCS1D02G009300	0.675405	0.0159361
KN9204-Specific	chr1D:4597456-4597715	TraesCS1D02G008200	0.583065	0.0466088
KN9204-Specific	chr1D:4597456-4597715	TraesCS1D02G008300	0.589846	0.0435171
KN9204-Specific	chr1D:4597456-4597715	TraesCS1D02G009192	0.896847	7.71788e-05
KN9204-Specific	chr1D:4610039-4610175	TraesCS1D02G009192	0.791233	0.00217347
KN9204-Specific	chr1D:4623504-4624579	TraesCS1D02G008200	0.697131	0.0117426
KN9204-Specific	chr1D:4623504-4624579	TraesCS1D02G008300	0.704672	0.0104993
KN9204-Specific	chr1D:4623504-4624579	TraesCS1D02G009192	0.963073	5.08253e-07
KN9204-Specific	chr1D:4639091-4639906	TraesCS1D02G008200	0.661674	0.019099
KN9204-Specific	chr1D:4639091-4639906	TraesCS1D02G008300	0.668208	0.0175414
KN9204-Specific	chr1D:4639091-4639906	TraesCS1D02G009192	0.954128	1.48072e-06
KN9204-Specific	chr1D:4639091-4639906	TraesCS1D02G009406	0.591606	0.042739
KN9204-Specific	chr1D:4643451-4643782	TraesCS1D02G008200	0.630302	0.0280161
KN9204-Specific	chr1D:4643451-4643782	TraesCS1D02G008300	0.633548	0.026976
KN9204-Specific	chr1D:4643451-4643782	TraesCS1D02G009192	0.938545	6.22317e-06
KN9204-Specific	chr1D:4645381-4645505	TraesCS1D02G009192	0.927908	1.35759e-05
KN9204-Specific	chr1D:4645381-4645505	TraesCS1D02G009300	0.58153	0.0473297
KN9204-Specific	chr1D:4666886-4667097	TraesCS1D02G008200	0.753717	0.00463784
KN9204-Specific	chr1D:4666886-4667097	TraesCS1D02G008300	0.765274	0.0037252
KN9204-Specific	chr1D:4666886-4667097	TraesCS1D02G009192	0.932884	9.57602e-06
KN9204-Specific	chr1D:4666886-4667097	TraesCS1D02G009406	0.73933	0.00599916
[truncated: 56,495 more rows]

## Sheet: TableS2B
Genes located in QMRL-7B
Gene ID	Log2FC(KN9204/J411 in NN)	Log2FC(KN9204/J411 in LN)	DEG category
TraesCS7B02G226300	-0.653996	0.372612
TraesCS7B02G226400	0.163423	0.425753
TraesCS7B02G226500	0.0294758	0.162905
TraesCS7B02G226600	0.510817	0.0748351
TraesCS7B02G226700	0.125167	0.100291
TraesCS7B02G226800	-0.203746	-1.11211
TraesCS7B02G226900	-0.0252652	0.199467
TraesCS7B02G227000	-0.135979	0.0596077
TraesCS7B02G227100	0	1.02787
TraesCS7B02G227200	-0.488041	-0.484502
TraesCS7B02G227300	-0.886011	1.01333
TraesCS7B02G227400	-0.27118	0.248411
TraesCS7B02G227500	-0.103496	-0.0581851
TraesCS7B02G227600	0.897274	-1.54286
TraesCS7B02G227700	0.0958536	0.335205
TraesCS7B02G227800	0.564476	0.341527
TraesCS7B02G227900	-2.13349	-0.910227
TraesCS7B02G228000	0.736293	0.860087
TraesCS7B02G228100	0.0270808	-0.431677
TraesCS7B02G228200	0.234766	-0.816294
TraesCS7B02G228300	0.014054	-0.23249
TraesCS7B02G228400	-0.0254515	0.215126
TraesCS7B02G228500	1.94567	1.01336
TraesCS7B02G228600	0.215514	0.00712264
TraesCS7B02G228700	-0.17945	0.0699643
TraesCS7B02G228900	-0.124898	-0.188934
TraesCS7B02G229000	0.561457	0.0804147
TraesCS7B02G229100	-0.848908	-0.506027
TraesCS7B02G229200	0.0266477	-0.126394
TraesCS7B02G229300	-0.841851	-1.58785	Higher in J411
TraesCS7B02G229400	0	1.01333
TraesCS7B02G229500	0.135766	-0.162462
TraesCS7B02G229600	-0.277796	1.15799
TraesCS7B02G229700	-0.21411	0.156116
TraesCS7B02G229800	-0.279983	-0.103083
TraesCS7B02G229900	-0.209482	-0.728459
TraesCS7B02G230000	0.62666	0.034591
TraesCS7B02G230100	0.136811	0.0862391
TraesCS7B02G230200	-0.215344	-0.0134435
TraesCS7B02G230300	-0.105334	-0.356952
TraesCS7B02G230400	0.762775	0.361332
TraesCS7B02G230500	-0.0847587	0.0421142
TraesCS7B02G230600	1.5435	0.226252
TraesCS7B02G230700	-0.210157	0.0122964
TraesCS7B02G230800	-0.170858	-0.0275898
TraesCS7B02G231000	0.558935	-0.429827
TraesCS7B02G231100	NA	NA
TraesCS7B02G231200	0	0
TraesCS7B02G231300	1.03752	1.01333
TraesCS7B02G231400	NA	NA
TraesCS7B02G231500	1.03752	0
TraesCS7B02G231600	-0.557754	1.06202
TraesCS7B02G231700	-0.536365	-0.0959393
TraesCS7B02G231800	0.410934	0.688998
TraesCS7B02G231900	0.388478	1.07689
TraesCS7B02G232000	-1.10281	-0.910225
TraesCS7B02G232100	0	0
TraesCS7B02G232200	-0.102237	-0.333259
TraesCS7B02G232300	-0.422918	-0.00968539
TraesCS7B02G232400	-1.50011	0.734557
TraesCS7B02G232500	-0.16325	-0.0859241
TraesCS7B02G232600	-0.117215	-0.592856
TraesCS7B02G232700	0.222106	-0.0814366
TraesCS7B02G232800	-0.0814108	-0.153809
TraesCS7B02G232900	0.376956	-0.113087
TraesCS7B02G233000	1.00264	-0.153627
TraesCS7B02G233100	-0.247822	-1.39328
TraesCS7B02G233200	-0.406432	-0.4792
TraesCS7B02G233300	0.0573174	0.941956
TraesCS7B02G233400	0.729083	0.107236
TraesCS7B02G233500	0.305735	-0.121573
TraesCS7B02G233600	-0.43838	-0.108073
TraesCS7B02G233700	0.586753	-0.0811744
TraesCS7B02G233800	-0.187993	0.073958
TraesCS7B02G233900	0.0924472	0.292643
TraesCS7B02G234000	0.930842	0
TraesCS7B02G234100	0.0646428	-0.0502334
TraesCS7B02G234200	-0.522301	0.598423
TraesCS7B02G234300	1.41224	-2.19469
TraesCS7B02G234400	7.7687	6.85301	Higher in KN9204
TraesCS7B02G234500	0.268592	0.380433
TraesCS7B02G234600	0.0737359	-0.031219
TraesCS7B02G234700	0.0821961	0.0532742
TraesCS7B02G234800	1.79056	1.4663
TraesCS7B02G234900	0.0487464	-1.82102
TraesCS7B02G235000	NA	NA
TraesCS7B02G235100	0.417867	-0.228103
TraesCS7B02G235200	3.00888	0
TraesCS7B02G235300	-0.526147	-0.52747
TraesCS7B02G235400	-0.312095	-0.459428
TraesCS7B02G235500	-2.85445	-1.88651
TraesCS7B02G235600	-1.73391	0
TraesCS7B02G235700	1.00031	-3.14744
TraesCS7B02G235800	-0.526719	0.0908078
TraesCS7B02G235900	-0.662034	-0.39902
TraesCS7B02G236000	-0.0573493	0.792086
TraesCS7B02G236100	0	0
TraesCS7B02G236200	NA	NA
TraesCS7B02G236300	1.90232	0.652217
TraesCS7B02G236400	-0.40224	-0.147911
TraesCS7B02G236500	-0.233412	-0.00451601
TraesCS7B02G236600	0.0635286	0.0702369
TraesCS7B02G236700	1.22879	2.32111
TraesCS7B02G236800	0.919188	0.920455
TraesCS7B02G236900	NA	NA
TraesCS7B02G237000	0.15592	-0.0720465
TraesCS7B02G237100	0.428588	-0.301106
TraesCS7B02G237200	0.0334781	-0.22467
TraesCS7B02G237300	1.93609	1.05053
TraesCS7B02G237400	0.0787464	0.0531492
TraesCS7B02G237500	-0.384154	0.112968
TraesCS7B02G237600	-0.324288	0.0453849
TraesCS7B02G237700	0.235884	0.103664
TraesCS7B02G237800	0.178294	0.805913
TraesCS7B02G237900	0.201257	-0.409325
TraesCS7B02G238000	-0.284772	0.238919
TraesCS7B02G238100	0.138568	-0.412457
TraesCS7B02G238200	0.0766565	-1.0182
TraesCS7B02G238300	0.337543	-0.447205
TraesCS7B02G238400	-0.104818	-0.453998
TraesCS7B02G238500	0.399449	0.0765912
TraesCS7B02G238600	-0.0402657	0.0489223
TraesCS7B02G238700	-0.322656	-0.512349
TraesCS7B02G238800	0.0533649	1.00383
TraesCS7B02G238900	-0.286854	-0.0885094
TraesCS7B02G239000	0.0695013	0.197286
TraesCS7B02G239100	-0.181391	-0.186529
TraesCS7B02G239200	-0.0735574	0.0353815
TraesCS7B02G239300	-0.174779	-0.413975
TraesCS7B02G239400	-0.0258613	0.123423
TraesCS7B02G239500	0.788065	0.199447
TraesCS7B02G239600	-0.0494543	0.349285
TraesCS7B02G239700	-0.0551082	-0.289285
TraesCS7B02G239800	0.0230517	-0.215987
TraesCS7B02G240000	0.086369	0.222579
TraesCS7B02G240100	-0.111178	0.0998408
TraesCS7B02G240200	-0.0206771	0.112441
TraesCS7B02G240300	0.338179	4.05923
TraesCS7B02G240400	-0.268492	1.11136
TraesCS7B02G240500	-0.649985	-2.12001
TraesCS7B02G240600	0.0569234	-0.00533384
TraesCS7B02G240700	-0.144917	-0.0649223
TraesCS7B02G240800	NA	NA
TraesCS7B02G240900	0.449335	0.310824
TraesCS7B02G241000	NA	NA
TraesCS7B02G241100	-0.0096487	0.0257087
TraesCS7B02G241200	0.214683	0.00376425
TraesCS7B02G241300	0.61064	0.280535
TraesCS7B02G241400	2.83515	0.308512	Higher in KN9204
TraesCS7B02G241500	0.0847284	0.0574763
TraesCS7B02G241600	0.483936	-0.601372
TraesCS7B02G241700	0.230675	0.2033
TraesCS7B02G241800	NA	NA
TraesCS7B02G241900	0.370864	0.10223
TraesCS7B02G242000	2.32648	1.52123
TraesCS7B02G242100	-0.171316	-0.0885889
TraesCS7B02G242200	0.91457	0.305141
TraesCS7B02G242300	0.0193783	0.140378
TraesCS7B02G242400	-0.25526	0.0960518
TraesCS7B02G242500	-0.186416	-0.0365622
TraesCS7B02G242600	-0.971968	0.0515679
TraesCS7B02G242700	0.0240757	0.0862383
TraesCS7B02G242800	0.175052	0.414827
TraesCS7B02G242900	1.13413	0.157815
TraesCS7B02G243000	0.627705	0.000923036
TraesCS7B02G243100	-0.273829	-1.67096
TraesCS7B02G243200	NA	NA
TraesCS7B02G243300	0.357156	-0.27399
TraesCS7B02G243400	-0.161726	-0.092376
TraesCS7B02G243500	-0.0960651	-0.150181
TraesCS7B02G243600	-0.00365819	0.0175489
TraesCS7B02G243700	0.136775	0.0319665
TraesCS7B02G243800	-0.0102604	-0.32777
TraesCS7B02G243900	-0.220237	-0.32981
TraesCS7B02G244000	-2.7155	-1.51536
TraesCS7B02G244100	0.0564795	0.609434
TraesCS7B02G244200	NA	NA
TraesCS7B02G244300	0.625013	0.61776
TraesCS7B02G244400	-1.7548	0
TraesCS7B02G244500	0.320785	0.199946
TraesCS7B02G244600	0.708358	-0.216299
TraesCS7B02G244700	1.35031	0.284586
TraesCS7B02G244800	0.199853	0.147475
TraesCS7B02G244900	2.02942	0.0603185
TraesCS7B02G245000	1.8507	2.48673	Higher in KN9204
TraesCS7B02G245100	0.490967	-0.073645
TraesCS7B02G245200	-0.186158	0.186264
TraesCS7B02G245300	0.129699	0.0570152
TraesCS7B02G245400	-0.00140948	-0.0458951
TraesCS7B02G245500	1.07444	0.450335
TraesCS7B02G245600	0.0452869	0.148421
TraesCS7B02G245700	0.485099	0.193747
TraesCS7B02G245800	-0.222487	-0.179324
TraesCS7B02G245900	0.113394	0.118119
TraesCS7B02G246000	-0.286108	-0.251363
TraesCS7B02G246100	NA	NA
TraesCS7B02G246200	-0.0436817	0.423845
TraesCS7B02G246300	2.49385	1.01336
TraesCS7B02G246400	0	0
TraesCS7B02G246500	-0.232275	0.0122122
TraesCS7B02G246600	-0.084868	0.914797
TraesCS7B02G246700	0.228248	-0.298922
TraesCS7B02G246800	0.100432	-0.0899031
TraesCS7B02G246900	-0.134446	-0.138816
TraesCS7B02G247000	-0.0468971	-0.0754346
TraesCS7B02G247100	-0.392099	-0.228419
TraesCS7B02G247200	-0.600873	-0.522435
TraesCS7B02G247300	-0.886011	0
TraesCS7B02G247400	0.239612	-0.221676
TraesCS7B02G247500	-0.179729	0.0019603
TraesCS7B02G247600	-0.18702	0.300265
TraesCS7B02G247700	0.377481	-0.00532116
TraesCS7B02G247800	0.230969	0.27028
TraesCS7B02G247900	0.100067	0.33078
TraesCS7B02G248000	0.161843	-0.274849
TraesCS7B02G248100	-0.0235723	0.404684
TraesCS7B02G248200	0.253442	-0.195752
TraesCS7B02G248300	2.89026	-0.328191
TraesCS7B02G248400	-0.226989	0.171419
TraesCS7B02G248500	-0.58597	-0.266964
TraesCS7B02G248600	1.83527	0.886264
TraesCS7B02G248700	0.600608	0.624586
TraesCS7B02G248800	0.0639706	0.125775
TraesCS7B02G248900	NA	NA
TraesCS7B02G249000	NA	NA
TraesCS7B02G249100	-0.151702	-0.250202
TraesCS7B02G249200	-0.181746	-0.0680954
TraesCS7B02G249300	0.200262	0.0516389
TraesCS7B02G249400	-0.136238	-0.331585
TraesCS7B02G249500	0.133585	-0.352121
TraesCS7B02G249600	0	0
TraesCS7B02G249700	1.99762	3.72247
TraesCS7B02G249800	2.2721	3.50275
TraesCS7B02G249900	-0.279724	0.288403
TraesCS7B02G250000	-0.0180689	-0.18761
TraesCS7B02G250100	0.0156853	-0.334376
TraesCS7B02G250200	0.00611933	0.281623
TraesCS7B02G250300	0.021633	0.16359
TraesCS7B02G250400	-0.0410712	-0.0427077
TraesCS7B02G250500	-0.132415	-0.0498117
TraesCS7B02G250700	1.58717	1.28142
TraesCS7B02G250800	2.65929	0.160422
TraesCS7B02G250900	NA	NA
TraesCS7B02G251000	-2.36207	0.872626
TraesCS7B02G251100	-0.0800606	-0.433812
TraesCS7B02G251200	-0.266802	-0.234986
TraesCS7B02G251300	NA	NA
TraesCS7B02G251400	0	1.01335
TraesCS7B02G251500	NA	NA
TraesCS7B02G251600	-0.0234087	0.550083
TraesCS7B02G251700	0.0112281	0.440249
TraesCS7B02G251800	1.03755	1.55983
TraesCS7B02G251900	-0.390737	0.122665
TraesCS7B02G252000	-0.0745619	-0.520652
TraesCS7B02G252100	-0.787579	0.237319
TraesCS7B02G252200	0.0637151	-0.463197
TraesCS7B02G252300	0.375601	0.0922307
TraesCS7B02G252400	0.248078	0.45018
TraesCS7B02G252500	0	-1.66584
TraesCS7B02G252600	0.11517	0.416392
TraesCS7B02G252700	-0.0682663	-0.217719
TraesCS7B02G252800	-1.30012	-1.34662
TraesCS7B02G252900	-0.148412	-0.145793
TraesCS7B02G253000	-0.253484	-0.539162
TraesCS7B02G253100	-0.566278	-0.612435
TraesCS7B02G253200	0.350024	-0.216869
TraesCS7B02G253300	1.03755	-0.893964
TraesCS7B02G253400	-0.115518	-0.406928
TraesCS7B02G253500	0.252709	-0.671095
TraesCS7B02G253600	-0.127748	0.890568
TraesCS7B02G253700	0.0259435	-0.0658986
TraesCS7B02G253800	NA	NA
TraesCS7B02G253900	NA	NA
TraesCS7B02G254000	0.92627	0.548743
TraesCS7B02G254100	0.392988	0.299151
TraesCS7B02G254200	0.690741	-0.114713
TraesCS7B02G254300	NA	NA
TraesCS7B02G254400	0.161147	-0.0600422
TraesCS7B02G254500	-0.0548046	0.0119836
TraesCS7B02G254600	-0.0813159	-0.000883786
TraesCS7B02G254700	-0.597212	0.596991
TraesCS7B02G254800	-0.196614	-0.14498
TraesCS7B02G254900	-0.18456	-0.0786684
TraesCS7B02G255000	-0.240942	0.159499
TraesCS7B02G255100	-0.0453159	0.206544
TraesCS7B02G255200	0.0983327	0.325655
TraesCS7B02G255400	0	0
TraesCS7B02G255500	-0.46631	0.180679
TraesCS7B02G255600	-0.870492	-1.8292
TraesCS7B02G255700	-2.14545	-1.8348
TraesCS7B02G255800	0.559497	0.175396
TraesCS7B02G255900	-0.886027	1.45986
TraesCS7B02G256000	1.52758	1.90581
TraesCS7B02G256100	-0.209818	-0.697667
TraesCS7B02G256200	NA	NA
TraesCS7B02G256300	0.131853	-0.0868268
TraesCS7B02G256500	-0.171687	-0.119709
TraesCS7B02G256700	0.00194501	-0.470727
TraesCS7B02G256600	NA	NA
TraesCS7B02G256800	1.03752	0
TraesCS7B02G256900	-0.252922	-0.108831
TraesCS7B02G257000	0.306803	-0.259262
TraesCS7B02G257200	NA	NA
TraesCS7B02G257300	0.0511991	-0.194058
TraesCS7B02G257400	-0.297958	-1.98492	Higher in J411
TraesCS7B02G257500	-0.240804	-0.285444
TraesCS7B02G257600	-0.143773	0.161479
TraesCS7B02G257700	-0.224581	0.0383205
TraesCS7B02G257800	NA	NA
TraesCS7B02G257900	-0.0159583	0.18803
TraesCS7B02G258000	2.01547	-3.64847
TraesCS7B02G258100	0	-2.95182
TraesCS7B02G258200	0.0427702	0.102031
TraesCS7B02G258300	0.413836	0.032635
TraesCS7B02G258400	NA	NA
TraesCS7B02G258500	0.566525	-0.174832
TraesCS7B02G258600	3.65413	-0.594639
TraesCS7B02G258700	0.162615	-0.113473
TraesCS7B02G258800	0.146514	-0.0321051
TraesCS7B02G258900	-0.886038	1.16872
TraesCS7B02G259000	0.0140975	-0.864823
TraesCS7B02G259100	-1.38679	1.87568
TraesCS7B02G259200	0.108084	0.0650293
TraesCS7B02G259300	-0.0590837	-0.0783111
TraesCS7B02G259400	-0.155382	-1.94605
TraesCS7B02G259500	1.84878	0.0646128
TraesCS7B02G259600	-0.276449	-0.337215
TraesCS7B02G259700	1.81698	-0.382422
TraesCS7B02G259800	-0.0528497	-0.118033
TraesCS7B02G259900	1.13448	0.326153
TraesCS7B02G260000	NA	NA
TraesCS7B02G260100	0	0
TraesCS7B02G260200	0.944165	0.159035
TraesCS7B02G260300	9.77738	9.68683	Higher in KN9204
TraesCS7B02G260400	-0.223145	-0.150001
TraesCS7B02G260500	0.277829	0.208044
TraesCS7B02G260600	0.35645	-0.0883572
TraesCS7B02G260700	0.440018	0.445716
TraesCS7B02G260800	-0.29372	-0.0977143
TraesCS7B02G260900	0.154577	0.488628
TraesCS7B02G261000	0.0542891	-0.776099
TraesCS7B02G261100	1.75989	1.61565
TraesCS7B02G261200	0.275861	0.267416
TraesCS7B02G261300	-0.805548	-0.109882
TraesCS7B02G261400	-1.11692	0.501528
TraesCS7B02G261500	0.0900203	1.05909
TraesCS7B02G261600	0.0721141	-0.0833736
TraesCS7B02G261700	-1.25104	0.784163
TraesCS7B02G261800	-0.0656101	-0.0758589
TraesCS7B02G261900	-0.0547507	-0.464571
TraesCS7B02G262000	-0.129042	0.126571
TraesCS7B02G262100	0.197291	0.202147
TraesCS7B02G262200	0.601196	0.134791
TraesCS7B02G262300	-0.0605202	-0.517347
TraesCS7B02G262400	-0.354269	-0.722748
TraesCS7B02G262500	1.02747	-0.705584
TraesCS7B02G262600	-0.993163	-1.28056
TraesCS7B02G262700	-0.547551	-0.3729
TraesCS7B02G262800	-0.470589	-0.550509
TraesCS7B02G262900	-0.129127	-0.408085
TraesCS7B02G263000	-0.0383461	-0.181917
TraesCS7B02G263100	-1.26435	1.04861
TraesCS7B02G263200	-0.268868	-0.258106
TraesCS7B02G263300	NA	NA
TraesCS7B02G263400	0.299378	-0.267684
TraesCS7B02G263500	0.224152	-0.200192
TraesCS7B02G263600	-0.0525755	-0.26714
TraesCS7B02G263700	-0.0503017	0.12529
TraesCS7B02G263800	-0.206961	0.0127091
TraesCS7B02G263900	0.92779	-0.224499
TraesCS7B02G264000	0.0559309	0.0723885
TraesCS7B02G264100	0.1849	0.0817803
TraesCS7B02G264200	1.00487	-0.262833
TraesCS7B02G264300	-0.660814	0.0133623
TraesCS7B02G264400	1.03755	1.45902
TraesCS7B02G264500	NA	NA
TraesCS7B02G264600	1.35105	1.26832
TraesCS7B02G264700	NA	NA
TraesCS7B02G264800	0	0
TraesCS7B02G265000	3.15661	2.8637	Higher in KN9204
TraesCS7B02G265100	0.075755	-0.910227
TraesCS7B02G265200	1.15477	0.260981
TraesCS7B02G265300	-0.886039	-1.88818
TraesCS7B02G265400	0.37845	0.0114817
TraesCS7B02G265500	0.144288	0.062078
TraesCS7B02G265600	0	1.01336
TraesCS7B02G265700	NA	NA
TraesCS7B02G265800	-1.00972	-0.06704
TraesCS7B02G265900	1.32502	-2.58838	Higher in J411
TraesCS7B02G266000	-0.137068	-0.281847
TraesCS7B02G266100	-0.0528788	-0.150294
TraesCS7B02G266200	0	1.98963
TraesCS7B02G266300	-0.451551	-0.455351
TraesCS7B02G266400	-0.232579	0.72738
TraesCS7B02G266500	0.0195675	0.108098
TraesCS7B02G266600	-0.509541	-1.46536
TraesCS7B02G266700	-3.09346	-1.30373
TraesCS7B02G266800	0.610185	-0.134891
TraesCS7B02G266900	0.00033792	-0.207965
TraesCS7B02G267000	0.139038	0.101011
TraesCS7B02G267100	NA	NA
TraesCS7B02G267200	-0.913669	0.405495
TraesCS7B02G267300	0	0
TraesCS7B02G267400	0.348553	-0.113877
TraesCS7B02G267500	-0.928824	-1.06238
TraesCS7B02G267600	0.160429	0.244861
TraesCS7B02G267700	-3.8107	-4.63262
TraesCS7B02G267800	0.288884	0.836479
TraesCS7B02G267900	0.0458214	1.10966
TraesCS7B02G268000	-0.688164	-0.495918
TraesCS7B02G268100	0.151304	0.828415
TraesCS7B02G268200	1.03754	0
TraesCS7B02G268300	-0.108569	-0.852872
TraesCS7B02G268400	-1.2397	-0.933664
TraesCS7B02G268500	0.574243	0.68851
TraesCS7B02G268600	NA	NA
TraesCS7B02G268700	-0.451965	-0.434945
TraesCS7B02G268800	NA	NA
TraesCS7B02G268900	-0.903291	-0.49657
TraesCS7B02G269000	-0.0678009	-0.197855
TraesCS7B02G269100	0	0
TraesCS7B02G269200	0	0
TraesCS7B02G269300	0.120298	-0.128563
TraesCS7B02G269400	0	1.01335
TraesCS7B02G269500	NA	NA
TraesCS7B02G269600	1.91111	1.40382
TraesCS7B02G269700	0.894262	0.804571
TraesCS7B02G269800	0.0707456	-0.462914
TraesCS7B02G269900	0.340341	0.0274927
TraesCS7B02G270000	-0.900111	0.582653
TraesCS7B02G270100	NA	NA
TraesCS7B02G270200	-0.123331	0.170194
TraesCS7B02G270300	0.751469	0.170985
TraesCS7B02G270400	-0.68201	-0.711337
TraesCS7B02G270500	0.300305	0.0723181
TraesCS7B02G270600	-0.365487	-0.0119133
TraesCS7B02G270700	NA	NA
TraesCS7B02G270800	0.407704	0.435175
TraesCS7B02G270900	-0.208211	0.337583
TraesCS7B02G271000	6.55266	6.2834	Higher in KN9204
TraesCS7B02G271100	0.116353	-0.0220135
TraesCS7B02G271151	-3.09848	-0.830818
TraesCS7B02G271200	-0.399403	-0.545119
TraesCS7B02G271300	-0.00579481	-0.0741495
TraesCS7B02G271400	-0.116761	-0.213825
TraesCS7B02G271500	0.0628259	-1.09409
TraesCS7B02G271600	0.486255	-0.235034
TraesCS7B02G271700	-0.0269002	-0.218666
TraesCS7B02G271800	0.0774246	-0.432611
TraesCS7B02G271900	0.901828	0.358815
TraesCS7B02G272000	0	0
TraesCS7B02G272100	-0.0588949	-0.00223496
TraesCS7B02G272200	-1.7763	0.0515677
TraesCS7B02G272300	1.06748	0.893614
TraesCS7B02G272400	0	0
TraesCS7B02G272500	0.681231	0.0954123
TraesCS7B02G272600	0	-1.95733
TraesCS7B02G272700	0	-2.6933
TraesCS7B02G272800	0.0526296	0.232719
TraesCS7B02G272900	0.235617	0.213089
TraesCS7B02G273000	-1.35095	-1.85237
TraesCS7B02G273100	-0.207412	0.0134522
TraesCS7B02G273200	0.971916	0.296769
TraesCS7B02G273300	0.163943	-0.0149392
TraesCS7B02G273400	0.795689	1.17258
TraesCS7B02G273500	2.49932	1.91029
TraesCS7B02G273600	0.625195	0.688812
TraesCS7B02G273700	1.81101	0.353957
TraesCS7B02G273800	-0.886011	0
TraesCS7B02G273900	0	0
TraesCS7B02G274000	NA	NA
TraesCS7B02G274100	0.948596	0.546234
TraesCS7B02G274200	1.52337	0.654447
TraesCS7B02G274300	0.628523	0.733925
TraesCS7B02G274400	0.222887	0.269128
TraesCS7B02G274500	1.36573	-0.00581378
TraesCS7B02G274600	-0.103176	-0.303369
TraesCS7B02G274700	0.235444	-0.0744058
TraesCS7B02G274800	NA	NA
TraesCS7B02G274900	0.075755	-0.529894
TraesCS7B02G275000	NA	NA
TraesCS7B02G275100	NA	NA
TraesCS7B02G275200	NA	NA
TraesCS7B02G275300	-0.0466581	0.0101046
TraesCS7B02G275400	NA	NA
TraesCS7B02G275500	0.417396	-0.247207
TraesCS7B02G275600	0.311322	-0.107551
TraesCS7B02G275700	0.00328517	0.0265377
TraesCS7B02G275800	1.22066	1.64673	Higher in KN9204
TraesCS7B02G276000	1.33236	0.0682635
TraesCS7B02G276100	2.98838	-0.317163
TraesCS7B02G276200	-1.37069	0
TraesCS7B02G276300	2.87771	1.17725
TraesCS7B02G276400	0.249822	0.170785
TraesCS7B02G276500	-0.151823	-0.230742
TraesCS7B02G276600	0.0658773	0.335247
TraesCS7B02G276700	0.553172	0.31246
TraesCS7B02G276800	0.318595	0.160443
TraesCS7B02G276900	NA	NA
TraesCS7B02G277000	-0.481811	-0.0277437
TraesCS7B02G277100	-0.305268	-0.622975
TraesCS7B02G277200	0.113183	0.0619802
TraesCS7B02G277300	1.07361	-0.356764
TraesCS7B02G277400	-0.646722	-0.263143
TraesCS7B02G277500	0.00971549	-0.0548292
TraesCS7B02G277600	0.247777	-0.228276
TraesCS7B02G277700	0.14617	-0.152146
TraesCS7B02G277800	-1.04687	0.464259
TraesCS7B02G277900	-0.0829155	-0.268727
TraesCS7B02G278000	-0.133338	-0.239931
TraesCS7B02G278100	0.151915	-1.46985
TraesCS7B02G278200	0.89769	0.382227
TraesCS7B02G278300	-0.00733058	0.11856
TraesCS7B02G278400	0.989828	1.19239
TraesCS7B02G278500	-0.131863	-0.115169
TraesCS7B02G278600	0.295866	0.895227
TraesCS7B02G278700	0	1.01333
TraesCS7B02G278800	-0.122566	-0.162095
TraesCS7B02G278900	-0.545041	-0.32909
TraesCS7B02G279000	-0.0610062	-0.0328302
TraesCS7B02G279100	-0.120122	0.0649267
TraesCS7B02G279200	-0.0029663	-0.300429
TraesCS7B02G279300	0.145892	-0.0298302
TraesCS7B02G279400	0.79046	0.596033
TraesCS7B02G279500	0.0626817	0.0247113
TraesCS7B02G279600	-0.258509	-0.664726
TraesCS7B02G279700	-1.36173	-0.440853
TraesCS7B02G279800	-0.343667	0.0873695
TraesCS7B02G279900	-0.132676	-0.714043
TraesCS7B02G280000	-0.327007	-0.461968
TraesCS7B02G280100	0.389894	0.130199
TraesCS7B02G280200	0.298461	0.0613804
TraesCS7B02G280300	-0.197335	-0.13119
TraesCS7B02G280400	-0.0106125	-0.0954399
TraesCS7B02G280500	-0.774411	0.487748
TraesCS7B02G280700	6.08057	6.60938	Higher in KN9204
TraesCS7B02G280800	-1.75489	0
TraesCS7B02G280900	-0.32387	-0.491914
TraesCS7B02G281000	-0.35301	-0.0639355
TraesCS7B02G281100	-1.76897	-1.23378
TraesCS7B02G281200	-0.226519	-0.496993
TraesCS7B02G281300	NA	NA
TraesCS7B02G281400	-0.0657593	-0.095099
TraesCS7B02G281500	NA	NA
TraesCS7B02G281600	3.27263	-0.512287
TraesCS7B02G281700	-0.44229	-0.435218
TraesCS7B02G281800	0.313122	-0.845249
TraesCS7B02G281900	NA	NA
TraesCS7B02G282000	0	-0.910197
TraesCS7B02G282100	-0.93104	-2.76329
TraesCS7B02G282200	-0.437271	-0.349185
TraesCS7B02G282300	0.307483	-0.121695
TraesCS7B02G282400	1.28409	0.557932
TraesCS7B02G282500	-0.09124	-0.197326
TraesCS7B02G282600	NA	NA
TraesCS7B02G282700	0.0327864	-0.303093
TraesCS7B02G282800	-0.297618	-0.0854464
TraesCS7B02G282900	-0.0480095	0.157131
TraesCS7B02G283000	-0.461322	0.610453
TraesCS7B02G283100	0.10099	0.529468
TraesCS7B02G283200	-0.162039	0.162739
TraesCS7B02G283300	0.89582	0.234659
TraesCS7B02G283400	1.62622	0.740305
TraesCS7B02G283600	NA	NA
TraesCS7B02G283700	NA	NA
TraesCS7B02G283800	0.724388	0.518815
TraesCS7B02G283900	-0.886011	0.909196
TraesCS7B02G284000	1.03752	0
TraesCS7B02G284100	0	0
TraesCS7B02G284200	NA	NA
TraesCS7B02G284300	-0.115545	1.68914	Higher in KN9204
TraesCS7B02G284400	-0.556056	-0.427156
TraesCS7B02G284500	-0.541518	-0.0995593
TraesCS7B02G284600	-1.80481	-1.55086
TraesCS7B02G284700	0.968377	0.53498
TraesCS7B02G284800	0.0757545	-0.866313
TraesCS7B02G284900	-0.186505	-0.278273
TraesCS7B02G285000	-0.0587086	-0.078407
TraesCS7B02G285100	0.145905	-0.504279
TraesCS7B02G285200	0.532887	-0.171513
TraesCS7B02G285300	0	0
TraesCS7B02G285400	-4.75824	-4.04142	Higher in J411
TraesCS7B02G285500	0.407974	-0.28639
TraesCS7B02G285600	2.42783	2.17691	Higher in KN9204
TraesCS7B02G285700	0.380439	-0.526522
TraesCS7B02G285800	2.17939	3.34033	Higher in KN9204
TraesCS7B02G285900	0.378065	1.28137
TraesCS7B02G286000	1.03755	0.530778
TraesCS7B02G286100	0.819569	-0.0158562
TraesCS7B02G286200	0.0910213	-0.256634
TraesCS7B02G286300	-0.183836	-0.283281
TraesCS7B02G286500	0.529061	-0.0760152
TraesCS7B02G286400	NA	NA
TraesCS7B02G286600	0.606503	-0.475254
TraesCS7B02G286700	-0.502153	-0.530194
TraesCS7B02G286800	-0.280816	0.164369
TraesCS7B02G286900	0.0495141	0.0233294
TraesCS7B02G287000	0.0545812	0.00889037
TraesCS7B02G287100	-0.0975998	-0.233869
TraesCS7B02G287200	0.609168	-0.0914802
TraesCS7B02G287300	NA	NA
TraesCS7B02G287400	-0.379655	1.0445
TraesCS7B02G287500	2.93651	-0.0090756
TraesCS7B02G287600	0	1.01333
TraesCS7B02G287700	0.000884805	0.207638
TraesCS7B02G287800	-0.105278	-0.0706797
TraesCS7B02G287900	0.411016	1.69512
TraesCS7B02G288000	0.353391	0.954441
TraesCS7B02G288100	1.38168	0.776214
TraesCS7B02G288200	0.658514	-0.0949273
TraesCS7B02G288300	-0.000881393	0.0484984
TraesCS7B02G288400	-0.0519847	-0.0399488
TraesCS7B02G288500	-0.406496	-0.198312
TraesCS7B02G288600	0.0757525	0
TraesCS7B02G288700	0.800624	0.0341065
TraesCS7B02G288800	0.0761283	-0.0367522
TraesCS7B02G288900	0.0799689	0.0454145
TraesCS7B02G289000	0.170799	-0.0277337
TraesCS7B02G289100	NA	NA
TraesCS7B02G289200	-0.55277	-0.618313
TraesCS7B02G289300	-0.403544	0.128288
TraesCS7B02G289400	0.212525	-0.17083
TraesCS7B02G289500	-0.0638683	-0.211475
TraesCS7B02G289600	0.656285	-0.0530702
TraesCS7B02G289700	-0.149345	0.0244307
TraesCS7B02G289800	0	0
TraesCS7B02G289900	1.03754	2.55602
TraesCS7B02G290000	1.03755	0.893054
TraesCS7B02G290100	-0.0153754	-0.153238
TraesCS7B02G290200	-0.88604	1.85953
TraesCS7B02G290300	-0.332992	-0.216404
TraesCS7B02G290400	0.0625411	-0.622146
TraesCS7B02G290500	NA	NA
TraesCS7B02G290600	0.975306	1.80779
TraesCS7B02G290700	1.13108	0.90544
TraesCS7B02G290800	0.222795	-0.480065
TraesCS7B02G290900	0.0571577	-0.265209
TraesCS7B02G291000	-0.122095	0.0910593
TraesCS7B02G291100	1.03755	0.634844
TraesCS7B02G291200	-0.395305	-0.825768
TraesCS7B02G291300	0.590028	-1.27157
TraesCS7B02G291400	1.59678	1.06196
TraesCS7B02G291500	NA	NA
TraesCS7B02G291600	0.0526071	-0.847386
TraesCS7B02G291700	0.0523963	-0.630127
TraesCS7B02G291800	-0.279641	-0.175929
TraesCS7B02G291900	0.0105088	0.231617
TraesCS7B02G292000	0.499652	0.98702
TraesCS7B02G292100	0.0758102	0.0719561
TraesCS7B02G292200	-0.0856847	-0.475782
TraesCS7B02G292300	1.03752	-0.910197
TraesCS7B02G292400	0	-1.31713
TraesCS7B02G292600	NA	NA
TraesCS7B02G292700	0.707038	-0.98319
TraesCS7B02G292800	NA	NA
TraesCS7B02G292900	0.395342	1.0643
TraesCS7B02G293000	-0.207126	-0.248925
TraesCS7B02G293100	-0.901495	-0.325243
TraesCS7B02G293200	0	0
TraesCS7B02G293400	0.319406	-0.325517
TraesCS7B02G293500	0.244254	0.273427
TraesCS7B02G293600	-0.217913	0.112871
TraesCS7B02G293700	-0.637166	0.0480801
TraesCS7B02G293800	0.839487	1.17475
TraesCS7B02G293900	0.327131	-1.76733
TraesCS7B02G294000	0.488999	-0.12754
TraesCS7B02G294100	NA	NA
TraesCS7B02G294200	-0.306935	-1.04389
TraesCS7B02G294300	-0.503748	-1.56315
TraesCS7B02G294400	0.391779	-0.988521
TraesCS7B02G294500	0	0
TraesCS7B02G294600	0.344089	-2.9756
TraesCS7B02G294700	-0.0927501	0.0480121
TraesCS7B02G294800	0.0466165	-0.0386495
TraesCS7B02G294900	-0.32329	0.133875
TraesCS7B02G295000	-0.193426	0.0341158
TraesCS7B02G295100	0	-2.39159
TraesCS7B02G295200	NA	NA
TraesCS7B02G295300	NA	NA
TraesCS7B02G295400	NA	NA
TraesCS7B02G295600	-0.0380128	0.36616
TraesCS7B02G295700	1.28165	0.90573
TraesCS7B02G295800	0	0
TraesCS7B02G295900	0	0
TraesCS7B02G296000	0.0757525	0
TraesCS7B02G296100	2.61234	0
TraesCS7B02G296300	0.208462	-0.107316
TraesCS7B02G296200	0.116198	0.293283
TraesCS7B02G296400	-0.258887	0.218262
TraesCS7B02G296500	-0.0660821	-0.244306
TraesCS7B02G296600	-0.554487	-0.0533787
TraesCS7B02G296700	0.106858	0.164573
TraesCS7B02G296800	-0.17048	1.07671
TraesCS7B02G296900	0.427077	-0.194535
TraesCS7B02G297000	-0.205367	-0.0710815
TraesCS7B02G297100	-0.16339	-0.0851945
TraesCS7B02G297200	-0.269762	-1.04796
TraesCS7B02G297300	0.0127724	-0.245512
TraesCS7B02G297400	0.219679	-0.153032
TraesCS7B02G297500	NA	NA
TraesCS7B02G297700	-1.02077	-0.536523
TraesCS7B02G297900	-0.572816	-0.498344
TraesCS7B02G298000	NA	NA
TraesCS7B02G298100	0.51314	0.49843
TraesCS7B02G298200	-0.95371	-0.52538
TraesCS7B02G298300	-1.82088	-0.189028
TraesCS7B02G298400	1.36054	-0.232664
TraesCS7B02G298500	1.10552	-0.211954
TraesCS7B02G298600	1.55653	-0.0318532
TraesCS7B02G298700	-0.798755	0.0995811
TraesCS7B02G298800	-0.047595	-0.349723
TraesCS7B02G298900	0	0
TraesCS7B02G299000	-0.0145217	0.199372
TraesCS7B02G299100	0.308657	-0.313437
TraesCS7B02G299200	0.359673	-0.00465693
TraesCS7B02G299300	0.0627705	0.0834631
TraesCS7B02G299400	NA	NA
TraesCS7B02G299500	0.475327	-0.0873684
TraesCS7B02G299600	-0.874779	0
TraesCS7B02G299700	-0.0287942	0.158287
TraesCS7B02G299800	-0.0238064	0.127361
TraesCS7B02G299900	0	0
TraesCS7B02G300000	-0.118962	-0.351841
TraesCS7B02G300100	-2.34657	0.0398317
TraesCS7B02G300200	0.116448	0.570644
TraesCS7B02G300300	-0.33822	-0.387472
TraesCS7B02G300400	NA	NA
TraesCS7B02G300500	-5.74549	-7.81927	Higher in J411
TraesCS7B02G300600	1.89314	1.01336
TraesCS7B02G300700	0	1.82486
TraesCS7B02G300800	-0.182212	0.810341
TraesCS7B02G300900	0	2.57535
TraesCS7B02G301000	-0.886011	-0.910197
TraesCS7B02G301100	-0.974784	0.45954
TraesCS7B02G301200	4.89005	6.20647	Higher in KN9204
TraesCS7B02G301300	-0.0796815	0.690533
TraesCS7B02G301400	-1.35259	-0.59361
TraesCS7B02G301500	0	-0.910206
TraesCS7B02G301600	NA	NA
TraesCS7B02G301700	NA	NA
TraesCS7B02G301800	NA	NA
TraesCS7B02G301900	-6.1761	-6.24782	Higher in J411
TraesCS7B02G302000	1.83737	0.997982	Higher in KN9204
TraesCS7B02G302100	0.396868	0.35222
TraesCS7B02G302200	0.200834	-0.0232512
TraesCS7B02G302300	0.292722	0.320587
TraesCS7B02G302400	-0.098568	-0.126731
TraesCS7B02G302500	-1.13101	-0.225494
TraesCS7B02G302600	-0.597812	-0.457176
TraesCS7B02G302700	-0.886038	1.93229
TraesCS7B02G302800	0.114091	-0.0766517
TraesCS7B02G302900	-0.0363963	0.123604
TraesCS7B02G303000	NA	NA
TraesCS7B02G303100	0.214986	1.20156
TraesCS7B02G303200	0.901806	0.909131
TraesCS7B02G303300	-0.997994	-0.128902
TraesCS7B02G303500	1.55489	2.21532
TraesCS7B02G303600	-0.784386	-0.216911
TraesCS7B02G303700	0.0757544	1.01335
TraesCS7B02G303800	0.146026	0.662166
TraesCS7B02G303900	-0.0720486	0.288222
TraesCS7B02G304000	-1.30155	0.0487765
TraesCS7B02G304100	0	0
TraesCS7B02G304200	NA	NA
TraesCS7B02G304300	NA	NA
TraesCS7B02G304400	0	1.01333
TraesCS7B02G304500	0	-1.69517
TraesCS7B02G304600	-0.380205	-0.17662
TraesCS7B02G304700	0.571853	0.300389
TraesCS7B02G304800	-0.894728	-0.519221
TraesCS7B02G304900	-0.297383	-0.394786
TraesCS7B02G305000	-0.958453	-0.623494
TraesCS7B02G305200	-0.186932	0.627788
TraesCS7B02G305300	-0.112028	-0.0401684
TraesCS7B02G305400	-2.34643	-0.910197
TraesCS7B02G305500	-2.65161	-2.70933	Higher in J411
TraesCS7B02G305600	1.2877	0.782552
TraesCS7B02G305700	0.071485	-0.0182473
TraesCS7B02G305800	-1.93115	-1.04145
TraesCS7B02G305900	-0.222166	-1.28164
TraesCS7B02G306000	0	0
TraesCS7B02G306100	-0.0911384	-0.0456034
TraesCS7B02G306200	-0.0528492	-0.0575451
TraesCS7B02G306300	0.389815	0.555752
TraesCS7B02G306400	-0.292116	-0.179682
TraesCS7B02G306500	0.527083	0.0663614
TraesCS7B02G306700	2.58863	1.63476
TraesCS7B02G306800	1.08389	1.63646
TraesCS7B02G306900	0.164332	-0.198011
TraesCS7B02G307000	-0.244043	-0.0734234
TraesCS7B02G307100	NA	NA
TraesCS7B02G307200	0.266219	0.059771
TraesCS7B02G307300	0.143321	0.00630956
TraesCS7B02G307400	NA	NA
TraesCS7B02G307500	-0.111774	0.361958
TraesCS7B02G307600	0	0
TraesCS7B02G307700	-0.293124	-1.15977
TraesCS7B02G307800	1.43465	2.08191
TraesCS7B02G307900	0.810766	1.05026
TraesCS7B02G308000	-1.00999	-0.661591
TraesCS7B02G308100	5.02843	3.37335
TraesCS7B02G308200	-0.379235	-0.127807
TraesCS7B02G308300	0.0579346	-0.0468888
TraesCS7B02G308400	NA	NA
TraesCS7B02G308600	0.716799	0.507556
TraesCS7B02G308700	-0.362806	-0.342091
TraesCS7B02G308800	0.712264	0.935105
TraesCS7B02G309000	NA	NA
TraesCS7B02G309100	-0.148976	0.065388
TraesCS7B02G309200	0.775526	0.703614
TraesCS7B02G309300	-0.132401	0.486969
TraesCS7B02G309400	-0.381248	-0.366234
TraesCS7B02G309500	-0.0322111	-0.221447
TraesCS7B02G309600	0.104276	0.106613
TraesCS7B02G309700	1.50371	1.51863
TraesCS7B02G309800	-0.266253	-0.17182
TraesCS7B02G309900	-0.325914	-0.215086
TraesCS7B02G310000	1.92423	4.10342
TraesCS7B02G310100	0.0862247	0.267326
TraesCS7B02G310200	NA	NA
TraesCS7B02G310300	NA	NA
TraesCS7B02G310400	NA	NA
TraesCS7B02G310500	0	4.27985
TraesCS7B02G310600	0.59236	-0.249594
TraesCS7B02G310700	0.165048	0.0555294
TraesCS7B02G310800	3.9463	0.0192876
TraesCS7B02G310900	0.28736	0.106611
TraesCS7B02G311000	-1.29884	-0.912501
TraesCS7B02G311100	-0.336498	-1.55304
TraesCS7B02G311200	1.15172	0.0541567
TraesCS7B02G311300	NA	NA
TraesCS7B02G311400	0.434245	1.22567
TraesCS7B02G311500	0.641433	0.60818
TraesCS7B02G311600	0.24104	-0.164189
TraesCS7B02G311800	NA	NA
TraesCS7B02G312000	-0.0287127	0.166284
TraesCS7B02G312100	1.15428	0.587398
TraesCS7B02G312200	1.34185	0.685326
TraesCS7B02G312300	1.03754	1.01336
TraesCS7B02G312400	7.50758	8.33492	Higher in KN9204
TraesCS7B02G312500	0.127114	0.581907
TraesCS7B02G312600	-0.19815	-0.810207
TraesCS7B02G312700	-0.258083	-0.591801
TraesCS7B02G312800	0	0
TraesCS7B02G312900	NA	NA
TraesCS7B02G313000	NA	NA
TraesCS7B02G313100	NA	NA
TraesCS7B02G313200	0	0
TraesCS7B02G313300	1.98224	1.68943
TraesCS7B02G313400	NA	NA
TraesCS7B02G313500	NA	NA
TraesCS7B02G313600	0.768006	0.598444
TraesCS7B02G313700	0.0130566	0.333733
TraesCS7B02G313800	3.5055	-0.987505
TraesCS7B02G314000	-0.460476	0.104604
TraesCS7B02G314100	-0.243712	-0.0689439
TraesCS7B02G314200	1.03752	0
TraesCS7B02G314300	0	-0.910197
TraesCS7B02G314400	-0.454985	-0.722065
TraesCS7B02G314500	-0.141789	0.485569
TraesCS7B02G314600	0.206425	0.348876
TraesCS7B02G314800	0.170721	0.0147126
TraesCS7B02G314900	0.182464	-0.0301499
TraesCS7B02G315000	-0.125566	0.146934
TraesCS7B02G315100	0.952477	-2.77281
TraesCS7B02G315200	0.614932	1.05501
TraesCS7B02G315300	0.636072	0.318068
TraesCS7B02G315600	0.0782127	-0.0158257
TraesCS7B02G315700	-0.10906	-0.34655
TraesCS7B02G315800	0.0901641	-0.0430445
TraesCS7B02G315900	NA	NA
TraesCS7B02G316000	2.28491	0.282309
TraesCS7B02G316100	NA	NA
TraesCS7B02G316200	-0.0128251	0.0989292
TraesCS7B02G316300	0.85793	0.577501
TraesCS7B02G316400	-0.563592	-0.599582
TraesCS7B02G316500	-0.356926	-0.278712
TraesCS7B02G316600	-0.163751	-0.529681
TraesCS7B02G316700	-4.22413	-2.33364
TraesCS7B02G316800	-0.586516	-0.778523
TraesCS7B02G316900	-5.52138	-1.62282	Higher in J411
TraesCS7B02G317000	-0.883802	-0.763336
TraesCS7B02G317100	0.0729224	0.643776
TraesCS7B02G317200	-0.752607	-0.2726
TraesCS7B02G317300	0	-0.910197
TraesCS7B02G317400	0	1.01333
TraesCS7B02G317500	0	0.0515679
TraesCS7B02G317600	5.90121	1.65704	Higher in KN9204
TraesCS7B02G317700	1.58956	1.74614
TraesCS7B02G317800	8.79538	7.31078	Higher in KN9204
TraesCS7B02G317900	3.54277	1.01336
TraesCS7B02G318000	-1.15168	-1.10889
TraesCS7B02G318100	0.296637	-0.228458
TraesCS7B02G318200	1.46735	-0.26164
TraesCS7B02G318300	NA	NA
TraesCS7B02G318400	1.12296	-0.0466277
TraesCS7B02G318500	-0.912177	-0.910226
TraesCS7B02G318600	0	0
TraesCS7B02G318700	0.674654	0.299354
TraesCS7B02G318800	-0.667868	-0.0368771
TraesCS7B02G318900	3.55181	5.23975
TraesCS7B02G319000	-0.00967004	-0.102851
TraesCS7B02G319100	0.958651	0.887659
TraesCS7B02G319200	-0.325073	-0.332567
TraesCS7B02G319300	0	0
TraesCS7B02G319400	NA	NA
TraesCS7B02G319500	0	-2.03806
TraesCS7B02G319600	-0.821524	-0.0704252
TraesCS7B02G319800	-0.106886	-0.157594
TraesCS7B02G319900	0.217371	0.0592619
TraesCS7B02G320000	-0.266031	-0.301724
TraesCS7B02G320100	0.972968	1.06164
TraesCS7B02G320200	0.0194876	-0.428289
TraesCS7B02G320300	NA	NA
TraesCS7B02G320500	-0.50796	0.393552
TraesCS7B02G320600	-0.324166	0.428286
TraesCS7B02G320700	0.0688197	0.798581
TraesCS7B02G320800	-0.12775	-0.285865
TraesCS7B02G320900	2.54812	-0.713308
TraesCS7B02G321000	NA	NA
TraesCS7B02G321200	9.20095	5.35892	Higher in KN9204
TraesCS7B02G321300	0.2962	0.219209
TraesCS7B02G321400	-1.24252	0
TraesCS7B02G321500	0.113631	0.342827
TraesCS7B02G321600	0.0249396	-0.368363
TraesCS7B02G321700	0.117345	0.0253093
TraesCS7B02G321800	0	0
TraesCS7B02G321900	1.48676	0.805275
TraesCS7B02G322000	1.18943	1.00985
TraesCS7B02G322100	-1.54963	-0.661613
TraesCS7B02G322200	1.08592	-0.379077
TraesCS7B02G322300	0.559923	-0.0801126
TraesCS7B02G322400	0.395218	0.361329
TraesCS7B02G322500	0.023652	-0.0378557
TraesCS7B02G322600	-1.02917	-0.270863
TraesCS7B02G322700	1.92149	2.91691
TraesCS7B02G322800	-0.243149	0.0963789
TraesCS7B02G322900	-0.411883	-0.247752
TraesCS7B02G323000	-1.83654	0
TraesCS7B02G323100	-0.135873	-0.121725
TraesCS7B02G323200	-0.190965	0.120357
TraesCS7B02G323300	-0.632872	0.0562706
TraesCS7B02G323400	1.93865	2.33783	Higher in KN9204
TraesCS7B02G323500	0	-0.910197
TraesCS7B02G323600	-0.0733492	0.194508
TraesCS7B02G323700	-0.0335545	-0.228674
TraesCS7B02G323800	-0.47541	0.347455
TraesCS7B02G323900	-0.0816036	-0.115654
TraesCS7B02G324000	0	0
TraesCS7B02G324200	NA	NA
TraesCS7B02G324300	-0.375924	0.118113
TraesCS7B02G324400	NA	NA
TraesCS7B02G324500	0.1223	-0.0391166
TraesCS7B02G324600	NA	NA
TraesCS7B02G324700	-0.151656	-0.0594443
TraesCS7B02G324800	0.649215	0.235235
TraesCS7B02G324900	0.00201248	-0.0292775
TraesCS7B02G325000	NA	NA
TraesCS7B02G325100	0.269632	0.985313
TraesCS7B02G325300	-0.0624184	-0.288864
TraesCS7B02G325400	-0.360044	0.00306707
TraesCS7B02G325500	0.0719432	0.3441
TraesCS7B02G325600	0.0763147	1.00251
TraesCS7B02G325700	-1.83654	-2.48219
TraesCS7B02G325800	0.709442	0.246896
TraesCS7B02G325900	-0.287138	-3.41583
TraesCS7B02G326000	0.292151	0.325857
TraesCS7B02G326100	0.018265	-1.16871
TraesCS7B02G326200	0.951563	0.44056
TraesCS7B02G326300	NA	NA
TraesCS7B02G326400	0.734929	0.84683
TraesCS7B02G326500	5.13612	5.29719	Higher in KN9204
TraesCS7B02G326555	0	-1.76657
TraesCS7B02G326600	NA	NA
TraesCS7B02G326700	1.3686	1.1013
TraesCS7B02G326900	-0.156983	5.85248	Higher in KN9204
TraesCS7B02G327000	2.33168	3.7112
TraesCS7B02G327100	0.935461	0.936084
TraesCS7B02G327200	1.60452	-0.101883
TraesCS7B02G327300	0	0
TraesCS7B02G327400	-0.34719	0.534236
TraesCS7B02G327500	0.535033	1.61976
TraesCS7B02G327600	-2.09345	-2.56294	Higher in J411
TraesCS7B02G327700	0.360046	-0.0586399
TraesCS7B02G327800	0.0382687	0.343051
TraesCS7B02G327900	-0.659028	-0.367275
TraesCS7B02G328000	0	0
TraesCS7B02G328100	-0.212115	-0.0720995
TraesCS7B02G328200	NA	NA
TraesCS7B02G328300	NA	NA
TraesCS7B02G328400	-0.0597828	-0.0229656
TraesCS7B02G328500	-0.191666	0.0419318
TraesCS7B02G328600	-0.956543	-0.724946
TraesCS7B02G328700	1.03755	-0.437294
TraesCS7B02G328800	NA	NA
TraesCS7B02G328900	-0.569615	-0.00335066
TraesCS7B02G329000	0	0
TraesCS7B02G329100	NA	NA
TraesCS7B02G329200	-4.74209	-5.07321
TraesCS7B02G329300	-1.35593	-1.13399
TraesCS7B02G329400	-3.96222	-2.56499	Higher in J411
TraesCS7B02G329500	-1.81939	-1.38781
TraesCS7B02G329600	-7.25959	-4.8638	Higher in J411
TraesCS7B02G329700	-7.46085	-8.228	Higher in J411
TraesCS7B02G329800	-2.34774	-1.82901
TraesCS7B02G329900	-1.78608	0
TraesCS7B02G330000	-0.400283	-0.238304
TraesCS7B02G330100	NA	NA
TraesCS7B02G330200	NA	NA
TraesCS7B02G330400	-9.03268	-9.63242	Higher in J411
TraesCS7B02G330500	7.40392	5.49158	Higher in KN9204
TraesCS7B02G330600	4.05369	2.18739	Higher in KN9204
TraesCS7B02G330700	-1.75814	-1.44231
TraesCS7B02G330800	0.271843	0.251209
TraesCS7B02G330900	0	0.0515662
TraesCS7B02G331000	-2.0528	-2.21154	Higher in J411
TraesCS7B02G331100	NA	NA
TraesCS7B02G331200	-10.1567	-9.47893	Higher in J411
TraesCS7B02G331300	-2.38826	-0.910197
TraesCS7B02G331400	-1.79107	-1.81229
TraesCS7B02G331500	0	0
TraesCS7B02G331600	-11.4656	-11.7361	Higher in J411
TraesCS7B02G331700	-10.5209	-10.2777	Higher in J411
TraesCS7B02G331800	-1.03108	0.318825
TraesCS7B02G331900	4.61754	3.87982
TraesCS7B02G332000	NA	NA
TraesCS7B02G332100	NA	NA
TraesCS7B02G332200	-2.53956	-1.91871	Higher in J411
TraesCS7B02G332300	-0.834529	-1.01753
TraesCS7B02G332400	-0.157608	2.08556	Higher in KN9204
TraesCS7B02G332500	5.25213	5.31048	Higher in KN9204
TraesCS7B02G332600	1.96783	0
TraesCS7B02G332700	-0.925915	1.354
TraesCS7B02G332800	8.13976	8.11371	Higher in KN9204
TraesCS7B02G332900	1.93916	3.22642
TraesCS7B02G333100	1.95185	2.12637
TraesCS7B02G333200	3.14143	3.76019	Higher in KN9204
TraesCS7B02G333300	-1.15434	0.328446
TraesCS7B02G333400	-10.8418	-9.41551	Higher in J411
TraesCS7B02G333500	-0.886011	-0.910197
TraesCS7B02G333600	-0.589649	0.163552
TraesCS7B02G333700	-0.47329	-0.172361
TraesCS7B02G333800	NA	NA
TraesCS7B02G333900	0	0
TraesCS7B02G334000	0.529197	0.87048
TraesCS7B02G334100	7.87143	5.91114	Higher in KN9204
TraesCS7B02G334200	1.45225	1.44101
TraesCS7B02G334300	-1.40562	-0.910223
TraesCS7B02G334400	0	0
TraesCS7B02G334500	-4.35344	-2.83567
TraesCS7B02G334600	5.75645	5.83934	Higher in KN9204
TraesCS7B02G334700	-3.7817	-2.72661	Higher in J411
TraesCS7B02G334800	0	0
TraesCS7B02G334900	1.66419	-0.159699	Higher in KN9204
TraesCS7B02G335000	0.368443	0.274308
TraesCS7B02G335100	NA	NA
TraesCS7B02G335200	-8.1451	-5.3535	Higher in J411
TraesCS7B02G335300	5.21956	6.05908	Higher in KN9204
TraesCS7B02G335400	NA	NA
TraesCS7B02G335500	0.717898	0.830298
TraesCS7B02G335600	1.30244	1.35215
TraesCS7B02G335700	-0.515726	-0.406549
TraesCS7B02G335800	-1.4087	-0.606457
TraesCS7B02G335900	0.488555	0.366468
TraesCS7B02G336000	NA	NA
TraesCS7B02G336100	-0.501866	-1.1645
TraesCS7B02G336200	NA	NA
TraesCS7B02G336300	-1.81933	-5.4668	Higher in J411
TraesCS7B02G336400	NA	NA
TraesCS7B02G336500	0	0
TraesCS7B02G336600	0.0294562	0.0829569
TraesCS7B02G336700	0.422993	0.334953
TraesCS7B02G336800	-0.901664	-1.56862
TraesCS7B02G336900	-0.616186	-1.12776
TraesCS7B02G337000	-1.96184	-1.78701
TraesCS7B02G337100	0.901264	0.848803
TraesCS7B02G337200	-1.5617	-1.24437
TraesCS7B02G337300	-1.4164	-0.661837
TraesCS7B02G337400	3.93201	3.65714	Higher in KN9204
TraesCS7B02G337500	3.3311	2.37183	Higher in KN9204
TraesCS7B02G337600	NA	NA
TraesCS7B02G337700	0.733984	0.875183
TraesCS7B02G337800	2.51464	4.07051
TraesCS7B02G337900	-1.06717	0.365536
TraesCS7B02G338000	NA	NA
TraesCS7B02G338100	NA	NA
TraesCS7B02G338200	1.86388	1.92945	Higher in KN9204
TraesCS7B02G338300	0	0
TraesCS7B02G338400	0.575303	0.333405
TraesCS7B02G338500	-0.070409	0.288829
TraesCS7B02G338600	NA	NA
TraesCS7B02G338700	0	0
TraesCS7B02G338800	NA	NA
TraesCS7B02G338900	3.30084	3.18094	Higher in KN9204
TraesCS7B02G339000	0	-0.910197
TraesCS7B02G339100	9.75129	8.28513	Higher in KN9204
TraesCS7B02G339200	3.00654	3.14223	Higher in KN9204
TraesCS7B02G339300	-0.703404	-0.512515
TraesCS7B02G339400	NA	NA
TraesCS7B02G339500	0	0
TraesCS7B02G339600	0.0757547	0.0515677
TraesCS7B02G339700	NA	NA
TraesCS7B02G339800	NA	NA
TraesCS7B02G339900	0.523476	0.724206
TraesCS7B02G340000	NA	NA
TraesCS7B02G340100	0.249551	-0.0115497
TraesCS7B02G340200	-0.372099	-0.293028
TraesCS7B02G340300	NA	NA
TraesCS7B02G340400	-0.594007	-0.985088
TraesCS7B02G340500	-0.0410839	1.15523
TraesCS7B02G340600	-0.570734	0.84862
TraesCS7B02G340700	0.0895836	0.0220115
TraesCS7B02G340800	NA	NA
TraesCS7B02G340900	-4.24746	-3.1175
TraesCS7B02G341000	NA	NA
TraesCS7B02G341200	0.650379	-0.207398
TraesCS7B02G341300	9.78836	7.64993	Higher in KN9204
TraesCS7B02G341400	0	0
TraesCS7B02G341500	0	0
TraesCS7B02G341600	0.765502	0.205204
TraesCS7B02G341800	NA	NA
TraesCS7B02G341900	0.598057	0.37256
TraesCS7B02G342000	0	0.86038
TraesCS7B02G342100	6.10853	7.36422	Higher in KN9204
TraesCS7B02G342200	0.490067	0.30259
TraesCS7B02G342300	0.0108059	0.630393
TraesCS7B02G342400	2.49454	0.774487
TraesCS7B02G342500	0.445466	0.644367
TraesCS7B02G342600	1.12991	0.0356142
TraesCS7B02G342700	1.64715	3.70135
TraesCS7B02G342800	2.68604	2.36757	Higher in KN9204
TraesCS7B02G342900	2.44698	1.51578	Higher in KN9204
TraesCS7B02G343000	2.48066	2.97218
TraesCS7B02G343100	NA	NA
TraesCS7B02G343200	0	0
TraesCS7B02G343300	4.18035	3.78573	Higher in KN9204
TraesCS7B02G343400	1.03752	0
TraesCS7B02G343500	NA	NA
TraesCS7B02G343600	0.510152	0.765014
TraesCS7B02G343700	3.2356	4.0575
TraesCS7B02G343800	0.390358	0.839871
TraesCS7B02G343900	NA	NA
TraesCS7B02G344000	NA	NA
TraesCS7B02G344100	NA	NA
TraesCS7B02G344200	2.51816	0.10795
TraesCS7B02G344300	0	1.96588
TraesCS7B02G344400	0	1.79673
TraesCS7B02G344500	-2.2365	-2.04172	Higher in J411
TraesCS7B02G344600	-2.49419	-1.90716	Higher in J411
TraesCS7B02G344700	-0.120549	-0.721472
TraesCS7B02G344800	1.03752	1.01334
TraesCS7B02G344900	-0.285007	-0.40543
TraesCS7B02G345000	NA	NA
TraesCS7B02G345100	NA	NA
TraesCS7B02G345200	0.348197	-0.778224
TraesCS7B02G345300	0.144978	-0.0310274
TraesCS7B02G345400	NA	NA
TraesCS7B02G345500	-0.276246	-0.00668685
TraesCS7B02G345600	0.0518011	-0.0945764
TraesCS7B02G345700	-0.328686	-0.0482151
TraesCS7B02G345800	-0.502013	-0.845834
TraesCS7B02G346000	-0.159879	-0.039984
TraesCS7B02G346100	0.389122	0.703108
TraesCS7B02G346200	0.0402564	-0.0250861
TraesCS7B02G346300	-0.592261	-0.376081
TraesCS7B02G346400	NA	NA
TraesCS7B02G346500	0.0698825	0.928195
TraesCS7B02G346600	-0.140341	0.105786
TraesCS7B02G346700	-0.288919	0.111295
TraesCS7B02G347000	0.290745	0.0407906
TraesCS7B02G347100	-0.695407	-0.939468
TraesCS7B02G347200	0.40325	1.26038
TraesCS7B02G347300	1.00204	1.21558
TraesCS7B02G347400	-0.345957	-0.15205
TraesCS7B02G347500	NA	NA
TraesCS7B02G347600	7.46451	5.55088	Higher in KN9204
TraesCS7B02G347700	0.0824341	0.113854
TraesCS7B02G347800	-0.322131	-0.0535106
TraesCS7B02G347900	-0.089991	-0.147471
TraesCS7B02G348000	NA	NA
TraesCS7B02G348100	NA	NA
TraesCS7B02G348200	NA	NA
TraesCS7B02G348300	NA	NA
TraesCS7B02G348400	NA	NA
TraesCS7B02G348500	-0.119677	0.38799
TraesCS7B02G348600	0.412552	0.267828
TraesCS7B02G348700	0.558804	0.730474
TraesCS7B02G348800	0.121684	0.0710825
TraesCS7B02G348900	NA	NA
TraesCS7B02G349000	0.244715	-0.0961249
TraesCS7B02G349100	-0.319384	0.0221717
TraesCS7B02G349200	1.66052	1.88545
TraesCS7B02G349300	NA	NA
TraesCS7B02G349400	0	0
TraesCS7B02G349500	-0.222532	1.41085
TraesCS7B02G349600	0	0
TraesCS7B02G349700	0	-1.70405
TraesCS7B02G349800	-0.886011	0
TraesCS7B02G349900	8.51279	9.02282	Higher in KN9204
TraesCS7B02G350000	-0.222626	0.500085
TraesCS7B02G350200	-0.551548	0.0504851
TraesCS7B02G350300	-0.0318252	1.06716
TraesCS7B02G350400	-0.280072	-0.231475
TraesCS7B02G350500	-0.93096	-1.06075
TraesCS7B02G350600	-0.436158	-0.0312728
TraesCS7B02G350700	-0.235094	0.0243345
TraesCS7B02G350800	-0.677716	0.247154
TraesCS7B02G351000	-1.114	-0.677733
TraesCS7B02G351100	2.22044	1.26957
TraesCS7B02G351200	0	0
TraesCS7B02G351300	NA	NA
TraesCS7B02G351400	0	0
TraesCS7B02G351500	NA	NA
TraesCS7B02G351600	0	0.480688
TraesCS7B02G351700	1.03755	3.92385
TraesCS7B02G351800	-0.479754	1.49168
TraesCS7B02G351900	-0.427721	0.0518884
TraesCS7B02G352000	-1.25221	-0.638222
TraesCS7B02G352100	0.0797164	-0.108096
TraesCS7B02G352200	-0.225283	0.0285399
TraesCS7B02G352300	1.24421	0.580355
TraesCS7B02G352400	1.0587	0.332255
TraesCS7B02G352500	0.16173	-0.236942
TraesCS7B02G352600	0	0
TraesCS7B02G352700	1.03752	0
TraesCS7B02G352800	0.291197	-0.088213
TraesCS7B02G353000	NA	NA
TraesCS7B02G353100	2.68014	1.01997
TraesCS7B02G353200	0.428209	0.194947
TraesCS7B02G353300	NA	NA
TraesCS7B02G353400	NA	NA
TraesCS7B02G353500	2.01166	2.80577
TraesCS7B02G353600	-0.292922	-0.925695
TraesCS7B02G353700	NA	NA
TraesCS7B02G353800	0.0843295	1.72339
TraesCS7B02G353900	-0.343751	-0.0951705
TraesCS7B02G354000	0.209737	0.18039
TraesCS7B02G354100	0.215306	0.399508
TraesCS7B02G354200	0.158547	0.330581
TraesCS7B02G354300	0.673543	0.272355
TraesCS7B02G354400	2.98697	2.369
TraesCS7B02G354500	0.25173	0.193187
TraesCS7B02G354800	-0.887898	-2.41498	Higher in J411
TraesCS7B02G354900	1.67378	-3.31627e-05	Higher in KN9204
TraesCS7B02G355000	NA	NA

## Sheet: TableS2C
Distal regulations of DEGs in QMRL-7B
DEGs in QMRL-7B	DEG category	Cultivar-specific distal regulator (H3K27ac peaks)
TraesCS7B02G280700	Higher in KN9204	chr7B:513717830-513717966
TraesCS7B02G285800	Higher in KN9204	chr7B:521117425-521117663
TraesCS7B02G317800	Higher in KN9204	chr7B:567986795-567987541
TraesCS7B02G326500	Higher in KN9204	chr7B:579819742-579820006
TraesCS7B02G326500	Higher in KN9204	chr7B:579821201-579821384
TraesCS7B02G326500	Higher in KN9204	chr7B:579829989-579830194
TraesCS7B02G326500	Higher in KN9204	chr7B:579849356-579849572
TraesCS7B02G326500	Higher in KN9204	chr7B:580156380-580156898
TraesCS7B02G326500	Higher in KN9204	chr7B:580157552-580158284
TraesCS7B02G326500	Higher in KN9204	chr7B:580611222-580611444
TraesCS7B02G326900	Higher in KN9204	chr7B:580857569-580858849
TraesCS7B02G330500	Higher in KN9204	chr7B:585655054-585655547
TraesCS7B02G330500	Higher in KN9204	chr7B:586048945-586049213
TraesCS7B02G330500	Higher in KN9204	chr7B:586049807-586049980
TraesCS7B02G330500	Higher in KN9204	chr7B:586052160-586052649
TraesCS7B02G330500	Higher in KN9204	chr7B:586062683-586063001
TraesCS7B02G330500	Higher in KN9204	chr7B:586088858-586089439
TraesCS7B02G330500	Higher in KN9204	chr7B:586089745-586090007
TraesCS7B02G330500	Higher in KN9204	chr7B:586099172-586099741
TraesCS7B02G330500	Higher in KN9204	chr7B:586100277-586100470
TraesCS7B02G330600	Higher in KN9204	chr7B:585655054-585655547
TraesCS7B02G330600	Higher in KN9204	chr7B:586048945-586049213
TraesCS7B02G330600	Higher in KN9204	chr7B:586049807-586049980
TraesCS7B02G330600	Higher in KN9204	chr7B:586052160-586052649
TraesCS7B02G330600	Higher in KN9204	chr7B:586062683-586063001
TraesCS7B02G330600	Higher in KN9204	chr7B:586088858-586089439
TraesCS7B02G330600	Higher in KN9204	chr7B:586089745-586090007
TraesCS7B02G330600	Higher in KN9204	chr7B:586099172-586099741
TraesCS7B02G330600	Higher in KN9204	chr7B:586100277-586100470
TraesCS7B02G332800	Higher in KN9204	chr7B:587921396-587921777
TraesCS7B02G332800	Higher in KN9204	chr7B:587967557-587967669
TraesCS7B02G332800	Higher in KN9204	chr7B:588051189-588051517
TraesCS7B02G332800	Higher in KN9204	chr7B:588054736-588054971
TraesCS7B02G332800	Higher in KN9204	chr7B:588060124-588060409
TraesCS7B02G332800	Higher in KN9204	chr7B:588065569-588065872
TraesCS7B02G332800	Higher in KN9204	chr7B:588066560-588067239
TraesCS7B02G332800	Higher in KN9204	chr7B:588075630-588076400
TraesCS7B02G332800	Higher in KN9204	chr7B:588154179-588154867
TraesCS7B02G332800	Higher in KN9204	chr7B:588248464-588248587
TraesCS7B02G332800	Higher in KN9204	chr7B:588273282-588273418
TraesCS7B02G332800	Higher in KN9204	chr7B:588279461-588279912
TraesCS7B02G333200	Higher in KN9204	chr7B:587921396-587921777
TraesCS7B02G333200	Higher in KN9204	chr7B:587967557-587967669
TraesCS7B02G333200	Higher in KN9204	chr7B:588051189-588051517
TraesCS7B02G333200	Higher in KN9204	chr7B:588054736-588054971
TraesCS7B02G333200	Higher in KN9204	chr7B:588066560-588067239
TraesCS7B02G333200	Higher in KN9204	chr7B:588154179-588154867
TraesCS7B02G333200	Higher in KN9204	chr7B:588248464-588248587
TraesCS7B02G334100	Higher in KN9204	chr7B:589112091-589112212
TraesCS7B02G334100	Higher in KN9204	chr7B:589112917-589113186
TraesCS7B02G334100	Higher in KN9204	chr7B:589127531-589127788
TraesCS7B02G334100	Higher in KN9204	chr7B:589131549-589131838
TraesCS7B02G334100	Higher in KN9204	chr7B:589133059-589133461
TraesCS7B02G334100	Higher in KN9204	chr7B:589135641-589135770
TraesCS7B02G334100	Higher in KN9204	chr7B:589136567-589136908
TraesCS7B02G334100	Higher in KN9204	chr7B:589393698-589393990
TraesCS7B02G334100	Higher in KN9204	chr7B:589400302-589401891
TraesCS7B02G334100	Higher in KN9204	chr7B:589461937-589462295
TraesCS7B02G334100	Higher in KN9204	chr7B:589709044-589709498
TraesCS7B02G334100	Higher in KN9204	chr7B:589940029-589940204
TraesCS7B02G334100	Higher in KN9204	chr7B:589950092-589950223
TraesCS7B02G334600	Higher in KN9204	chr7B:589393698-589393990
TraesCS7B02G334600	Higher in KN9204	chr7B:589400302-589401891
TraesCS7B02G334600	Higher in KN9204	chr7B:589407327-589407511
TraesCS7B02G334600	Higher in KN9204	chr7B:589461937-589462295
TraesCS7B02G334600	Higher in KN9204	chr7B:589709044-589709498
TraesCS7B02G334600	Higher in KN9204	chr7B:589907601-589907782
TraesCS7B02G334600	Higher in KN9204	chr7B:589940029-589940204
TraesCS7B02G334600	Higher in KN9204	chr7B:589942191-589942625
TraesCS7B02G334600	Higher in KN9204	chr7B:589950092-589950223
TraesCS7B02G334600	Higher in KN9204	chr7B:590026204-590026414
TraesCS7B02G334600	Higher in KN9204	chr7B:590028934-590029690
TraesCS7B02G334600	Higher in KN9204	chr7B:590035021-590035193
TraesCS7B02G334600	Higher in KN9204	chr7B:590037922-590038109
TraesCS7B02G334600	Higher in KN9204	chr7B:590042213-590042349
TraesCS7B02G334600	Higher in KN9204	chr7B:590100942-590101202
TraesCS7B02G334600	Higher in KN9204	chr7B:590125320-590125652
TraesCS7B02G334600	Higher in KN9204	chr7B:590130959-590131575
TraesCS7B02G334600	Higher in KN9204	chr7B:590132295-590132489
TraesCS7B02G334600	Higher in KN9204	chr7B:590149074-590149261
TraesCS7B02G334600	Higher in KN9204	chr7B:590152882-590153034
TraesCS7B02G334600	Higher in KN9204	chr7B:590158694-590158923
TraesCS7B02G335300	Higher in KN9204	chr7B:589940029-589940204
TraesCS7B02G335300	Higher in KN9204	chr7B:590026204-590026414
TraesCS7B02G335300	Higher in KN9204	chr7B:590037922-590038109
TraesCS7B02G335300	Higher in KN9204	chr7B:590100942-590101202
TraesCS7B02G335300	Higher in KN9204	chr7B:590125320-590125652
TraesCS7B02G335300	Higher in KN9204	chr7B:590130959-590131575
TraesCS7B02G335300	Higher in KN9204	chr7B:590132295-590132489
TraesCS7B02G335300	Higher in KN9204	chr7B:590152882-590153034
TraesCS7B02G337400	Higher in KN9204	chr7B:591970749-591971079
TraesCS7B02G337400	Higher in KN9204	chr7B:592320874-592321093
TraesCS7B02G337400	Higher in KN9204	chr7B:592402970-592403126
TraesCS7B02G337400	Higher in KN9204	chr7B:592403383-592403836
TraesCS7B02G337400	Higher in KN9204	chr7B:592403849-592404224
TraesCS7B02G337400	Higher in KN9204	chr7B:592422484-592422680
TraesCS7B02G337400	Higher in KN9204	chr7B:592426820-592427178
TraesCS7B02G337400	Higher in KN9204	chr7B:592516737-592516950
TraesCS7B02G337400	Higher in KN9204	chr7B:592517617-592517828
TraesCS7B02G337400	Higher in KN9204	chr7B:592546053-592546458
TraesCS7B02G337400	Higher in KN9204	chr7B:592592983-592593114
TraesCS7B02G337400	Higher in KN9204	chr7B:592594058-592594232
TraesCS7B02G337400	Higher in KN9204	chr7B:592612654-592612841
TraesCS7B02G337400	Higher in KN9204	chr7B:592624030-592624168
TraesCS7B02G337400	Higher in KN9204	chr7B:592630844-592631348
TraesCS7B02G337400	Higher in KN9204	chr7B:592639868-592640084
TraesCS7B02G337400	Higher in KN9204	chr7B:592642866-592643314
TraesCS7B02G337400	Higher in KN9204	chr7B:592660759-592661071
TraesCS7B02G337400	Higher in KN9204	chr7B:592661606-592661755
TraesCS7B02G337400	Higher in KN9204	chr7B:592674159-592675030
TraesCS7B02G337400	Higher in KN9204	chr7B:592685900-592686460
TraesCS7B02G337400	Higher in KN9204	chr7B:592686930-592687136
TraesCS7B02G337400	Higher in KN9204	chr7B:592687437-592687617
TraesCS7B02G337400	Higher in KN9204	chr7B:592703576-592703787
TraesCS7B02G337400	Higher in KN9204	chr7B:592721847-592722031
TraesCS7B02G337500	Higher in KN9204	chr7B:592402970-592403126
TraesCS7B02G337500	Higher in KN9204	chr7B:592403383-592403836
TraesCS7B02G337500	Higher in KN9204	chr7B:592403849-592404224
TraesCS7B02G337500	Higher in KN9204	chr7B:592516737-592516950
TraesCS7B02G337500	Higher in KN9204	chr7B:592517617-592517828
TraesCS7B02G337500	Higher in KN9204	chr7B:592546053-592546458
TraesCS7B02G337500	Higher in KN9204	chr7B:592592983-592593114
TraesCS7B02G337500	Higher in KN9204	chr7B:592594058-592594232
TraesCS7B02G337500	Higher in KN9204	chr7B:592624030-592624168
TraesCS7B02G337500	Higher in KN9204	chr7B:592630844-592631348
TraesCS7B02G337500	Higher in KN9204	chr7B:592639868-592640084
TraesCS7B02G337500	Higher in KN9204	chr7B:592642866-592643314
TraesCS7B02G337500	Higher in KN9204	chr7B:592660759-592661071
TraesCS7B02G337500	Higher in KN9204	chr7B:592674159-592675030
TraesCS7B02G337500	Higher in KN9204	chr7B:592721847-592722031
TraesCS7B02G338900	Higher in KN9204	chr7B:592703576-592703787
TraesCS7B02G338900	Higher in KN9204	chr7B:592721847-592722031
TraesCS7B02G338900	Higher in KN9204	chr7B:593070356-593070783
TraesCS7B02G338900	Higher in KN9204	chr7B:593191893-593192852
TraesCS7B02G338900	Higher in KN9204	chr7B:593261307-593261465
TraesCS7B02G338900	Higher in KN9204	chr7B:593283835-593284147
TraesCS7B02G338900	Higher in KN9204	chr7B:593284327-593285270
TraesCS7B02G338900	Higher in KN9204	chr7B:593288448-593288601
TraesCS7B02G338900	Higher in KN9204	chr7B:593289700-593290265
TraesCS7B02G339100	Higher in KN9204	chr7B:593191893-593192852
TraesCS7B02G339100	Higher in KN9204	chr7B:593283835-593284147
TraesCS7B02G339100	Higher in KN9204	chr7B:593288448-593288601
TraesCS7B02G339100	Higher in KN9204	chr7B:593289700-593290265
TraesCS7B02G341300	Higher in KN9204	chr7B:595474532-595474755
TraesCS7B02G341300	Higher in KN9204	chr7B:595888142-595888332
TraesCS7B02G341300	Higher in KN9204	chr7B:595888598-595888870
TraesCS7B02G341300	Higher in KN9204	chr7B:595889521-595889718
TraesCS7B02G341300	Higher in KN9204	chr7B:595892857-595892993
TraesCS7B02G341300	Higher in KN9204	chr7B:596286237-596286422
TraesCS7B02G341300	Higher in KN9204	chr7B:596287529-596288106
TraesCS7B02G342100	Higher in KN9204	chr7B:597159164-597159344
TraesCS7B02G342100	Higher in KN9204	chr7B:597590403-597590620
TraesCS7B02G343300	Higher in KN9204	chr7B:598900023-598900185
TraesCS7B02G343300	Higher in KN9204	chr7B:598900758-598901074
TraesCS7B02G349900	Higher in KN9204	chr7B:606726456-606726912
TraesCS7B02G349900	Higher in KN9204	chr7B:606728214-606728555
TraesCS7B02G349900	Higher in KN9204	chr7B:606730835-606731221
TraesCS7B02G349900	Higher in KN9204	chr7B:607303171-607303504
TraesCS7B02G349900	Higher in KN9204	chr7B:607303918-607304354
TraesCS7B02G349900	Higher in KN9204	chr7B:607304617-607304738
TraesCS7B02G349900	Higher in KN9204	chr7B:607328261-607329492
TraesCS7B02G349900	Higher in KN9204	chr7B:607329711-607329856
TraesCS7B02G349900	Higher in KN9204	chr7B:607331818-607332680
TraesCS7B02G300500	Higher in J411	chr7B:537374995-537375414
TraesCS7B02G300500	Higher in J411	chr7B:537964917-537965267
TraesCS7B02G301900	Higher in J411	chr7B:538315750-538316178
TraesCS7B02G305500	Higher in J411	chr7B:547280776-547280995
TraesCS7B02G329400	Higher in J411	chr7B:584257479-584257834
TraesCS7B02G329400	Higher in J411	chr7B:584261260-584261533
TraesCS7B02G329400	Higher in J411	chr7B:584757991-584758139
TraesCS7B02G329400	Higher in J411	chr7B:584785598-584786148
TraesCS7B02G329600	Higher in J411	chr7B:584233838-584235019
TraesCS7B02G329600	Higher in J411	chr7B:584256798-584257074
TraesCS7B02G329600	Higher in J411	chr7B:584257479-584257834
TraesCS7B02G329600	Higher in J411	chr7B:584261260-584261533
TraesCS7B02G329600	Higher in J411	chr7B:584275113-584275494
TraesCS7B02G329600	Higher in J411	chr7B:584319761-584319890
TraesCS7B02G329600	Higher in J411	chr7B:584322453-584323057
TraesCS7B02G329600	Higher in J411	chr7B:584756809-584757186
TraesCS7B02G329600	Higher in J411	chr7B:584757991-584758139
TraesCS7B02G329600	Higher in J411	chr7B:584759320-584759804
TraesCS7B02G329600	Higher in J411	chr7B:584785598-584786148
TraesCS7B02G329600	Higher in J411	chr7B:584804348-584804595
TraesCS7B02G329700	Higher in J411	chr7B:584319761-584319890
TraesCS7B02G329700	Higher in J411	chr7B:584322453-584323057
TraesCS7B02G329700	Higher in J411	chr7B:584756809-584757186
TraesCS7B02G329700	Higher in J411	chr7B:584757991-584758139
TraesCS7B02G329700	Higher in J411	chr7B:584759320-584759804
TraesCS7B02G329700	Higher in J411	chr7B:584785598-584786148
TraesCS7B02G329700	Higher in J411	chr7B:584804348-584804595
TraesCS7B02G330400	Higher in J411	chr7B:585847116-585847481
TraesCS7B02G330400	Higher in J411	chr7B:585962439-585962766
TraesCS7B02G330400	Higher in J411	chr7B:585964007-585964545
TraesCS7B02G330400	Higher in J411	chr7B:585965384-585965489
TraesCS7B02G330400	Higher in J411	chr7B:585984315-585984578
TraesCS7B02G330400	Higher in J411	chr7B:585984636-585984741
TraesCS7B02G331000	Higher in J411	chr7B:585847116-585847481
TraesCS7B02G331000	Higher in J411	chr7B:585848909-585849379
TraesCS7B02G331000	Higher in J411	chr7B:585866789-585867401
TraesCS7B02G331000	Higher in J411	chr7B:585877173-585877954
TraesCS7B02G331000	Higher in J411	chr7B:585911442-585911832
TraesCS7B02G331000	Higher in J411	chr7B:585945979-585946671
TraesCS7B02G331000	Higher in J411	chr7B:585962439-585962766
TraesCS7B02G331000	Higher in J411	chr7B:585964007-585964545
TraesCS7B02G331000	Higher in J411	chr7B:585966744-585967808
TraesCS7B02G331000	Higher in J411	chr7B:585983899-585984087
TraesCS7B02G331000	Higher in J411	chr7B:585984315-585984578
TraesCS7B02G331000	Higher in J411	chr7B:585984636-585984741
TraesCS7B02G331000	Higher in J411	chr7B:585999340-585999680
TraesCS7B02G331000	Higher in J411	chr7B:586164489-586165432
TraesCS7B02G331000	Higher in J411	chr7B:586259594-586260040
TraesCS7B02G331000	Higher in J411	chr7B:586307495-586307759
TraesCS7B02G331000	Higher in J411	chr7B:586308347-586308643
TraesCS7B02G331000	Higher in J411	chr7B:586572106-586572495
TraesCS7B02G331000	Higher in J411	chr7B:586574638-586574901
TraesCS7B02G331000	Higher in J411	chr7B:586586219-586586759
TraesCS7B02G331000	Higher in J411	chr7B:586689844-586690094
TraesCS7B02G331000	Higher in J411	chr7B:586690570-586691010
TraesCS7B02G331000	Higher in J411	chr7B:586695121-586695419
TraesCS7B02G331000	Higher in J411	chr7B:586695965-586696326
TraesCS7B02G331000	Higher in J411	chr7B:586696607-586696742
TraesCS7B02G331000	Higher in J411	chr7B:586696890-586697641
TraesCS7B02G331000	Higher in J411	chr7B:586703497-586704519
TraesCS7B02G331000	Higher in J411	chr7B:586727018-586727350
TraesCS7B02G331000	Higher in J411	chr7B:586731058-586731300
TraesCS7B02G331000	Higher in J411	chr7B:586731758-586732019
TraesCS7B02G331000	Higher in J411	chr7B:586734334-586734439
TraesCS7B02G331000	Higher in J411	chr7B:586833337-586834388
TraesCS7B02G331200	Higher in J411	chr7B:586164489-586165432
TraesCS7B02G331200	Higher in J411	chr7B:586259594-586260040
TraesCS7B02G331200	Higher in J411	chr7B:586303747-586303937
TraesCS7B02G331200	Higher in J411	chr7B:586306308-586306534
TraesCS7B02G331200	Higher in J411	chr7B:586306898-586307128
TraesCS7B02G331200	Higher in J411	chr7B:586307495-586307759
TraesCS7B02G331200	Higher in J411	chr7B:586308347-586308643
TraesCS7B02G331200	Higher in J411	chr7B:586572106-586572495
TraesCS7B02G331200	Higher in J411	chr7B:586574638-586574901
TraesCS7B02G331200	Higher in J411	chr7B:586586219-586586759
TraesCS7B02G331200	Higher in J411	chr7B:586689844-586690094
TraesCS7B02G331200	Higher in J411	chr7B:586690570-586691010
TraesCS7B02G331200	Higher in J411	chr7B:586694957-586695099
TraesCS7B02G331200	Higher in J411	chr7B:586695121-586695419
TraesCS7B02G331200	Higher in J411	chr7B:586695965-586696326
TraesCS7B02G331200	Higher in J411	chr7B:586696607-586696742
TraesCS7B02G331200	Higher in J411	chr7B:586696890-586697641
TraesCS7B02G331200	Higher in J411	chr7B:586698813-586698918
TraesCS7B02G331200	Higher in J411	chr7B:586703497-586704519
TraesCS7B02G331200	Higher in J411	chr7B:586725883-586726156
TraesCS7B02G331200	Higher in J411	chr7B:586727018-586727350
TraesCS7B02G331200	Higher in J411	chr7B:586731058-586731300
TraesCS7B02G331200	Higher in J411	chr7B:586731758-586732019
TraesCS7B02G331200	Higher in J411	chr7B:586734334-586734439
TraesCS7B02G331200	Higher in J411	chr7B:586824883-586824997
TraesCS7B02G331200	Higher in J411	chr7B:586833337-586834388
TraesCS7B02G331200	Higher in J411	chr7B:586838379-586839172
TraesCS7B02G331200	Higher in J411	chr7B:586842742-586842900
TraesCS7B02G331200	Higher in J411	chr7B:586930682-586931765
TraesCS7B02G331200	Higher in J411	chr7B:586936267-586936560
TraesCS7B02G331200	Higher in J411	chr7B:586937082-586937535
TraesCS7B02G331200	Higher in J411	chr7B:586939406-586939648
TraesCS7B02G331200	Higher in J411	chr7B:586961878-586962027
TraesCS7B02G331600	Higher in J411	chr7B:586259594-586260040
TraesCS7B02G331600	Higher in J411	chr7B:586303747-586303937
TraesCS7B02G331600	Higher in J411	chr7B:586306308-586306534
TraesCS7B02G331600	Higher in J411	chr7B:586306898-586307128
TraesCS7B02G331600	Higher in J411	chr7B:586307495-586307759
TraesCS7B02G331600	Higher in J411	chr7B:586308347-586308643
TraesCS7B02G331600	Higher in J411	chr7B:586572106-586572495
TraesCS7B02G331600	Higher in J411	chr7B:586574638-586574901
TraesCS7B02G331600	Higher in J411	chr7B:586586219-586586759
TraesCS7B02G331600	Higher in J411	chr7B:586689844-586690094
TraesCS7B02G331600	Higher in J411	chr7B:586690570-586691010
TraesCS7B02G331600	Higher in J411	chr7B:586694957-586695099
TraesCS7B02G331600	Higher in J411	chr7B:586695121-586695419
TraesCS7B02G331600	Higher in J411	chr7B:586695965-586696326
TraesCS7B02G331600	Higher in J411	chr7B:586696607-586696742
TraesCS7B02G331600	Higher in J411	chr7B:586696890-586697641
TraesCS7B02G331600	Higher in J411	chr7B:586698813-586698918
TraesCS7B02G331600	Higher in J411	chr7B:586703497-586704519
TraesCS7B02G331600	Higher in J411	chr7B:586725883-586726156
TraesCS7B02G331600	Higher in J411	chr7B:586727018-586727350
TraesCS7B02G331600	Higher in J411	chr7B:586731058-586731300
TraesCS7B02G331600	Higher in J411	chr7B:586731758-586732019
TraesCS7B02G331600	Higher in J411	chr7B:586734334-586734439
TraesCS7B02G331600	Higher in J411	chr7B:586824883-586824997
TraesCS7B02G331600	Higher in J411	chr7B:586833337-586834388
TraesCS7B02G331600	Higher in J411	chr7B:586838379-586839172
TraesCS7B02G331600	Higher in J411	chr7B:586842742-586842900
TraesCS7B02G331600	Higher in J411	chr7B:586930682-586931765
TraesCS7B02G331600	Higher in J411	chr7B:586936267-586936560
TraesCS7B02G331600	Higher in J411	chr7B:586937082-586937535
TraesCS7B02G331600	Higher in J411	chr7B:586939406-586939648
TraesCS7B02G331600	Higher in J411	chr7B:586961878-586962027
TraesCS7B02G331700	Higher in J411	chr7B:586259594-586260040
TraesCS7B02G331700	Higher in J411	chr7B:586303747-586303937
TraesCS7B02G331700	Higher in J411	chr7B:586306308-586306534
TraesCS7B02G331700	Higher in J411	chr7B:586306898-586307128
TraesCS7B02G331700	Higher in J411	chr7B:586307495-586307759
TraesCS7B02G331700	Higher in J411	chr7B:586308347-586308643
TraesCS7B02G331700	Higher in J411	chr7B:586572106-586572495
TraesCS7B02G331700	Higher in J411	chr7B:586574638-586574901
TraesCS7B02G331700	Higher in J411	chr7B:586586219-586586759
TraesCS7B02G331700	Higher in J411	chr7B:586689844-586690094
TraesCS7B02G331700	Higher in J411	chr7B:586690570-586691010
TraesCS7B02G331700	Higher in J411	chr7B:586694957-586695099
TraesCS7B02G331700	Higher in J411	chr7B:586695121-586695419
TraesCS7B02G331700	Higher in J411	chr7B:586695965-586696326
TraesCS7B02G331700	Higher in J411	chr7B:586696607-586696742
TraesCS7B02G331700	Higher in J411	chr7B:586696890-586697641
TraesCS7B02G331700	Higher in J411	chr7B:586698813-586698918
TraesCS7B02G331700	Higher in J411	chr7B:586703497-586704519
TraesCS7B02G331700	Higher in J411	chr7B:586725883-586726156
TraesCS7B02G331700	Higher in J411	chr7B:586727018-586727350
TraesCS7B02G331700	Higher in J411	chr7B:586731058-586731300
TraesCS7B02G331700	Higher in J411	chr7B:586731758-586732019
TraesCS7B02G331700	Higher in J411	chr7B:586734334-586734439
TraesCS7B02G331700	Higher in J411	chr7B:586824883-586824997
TraesCS7B02G331700	Higher in J411	chr7B:586833337-586834388
TraesCS7B02G331700	Higher in J411	chr7B:586838379-586839172
TraesCS7B02G331700	Higher in J411	chr7B:586842742-586842900
TraesCS7B02G331700	Higher in J411	chr7B:586930682-586931765
TraesCS7B02G331700	Higher in J411	chr7B:586936267-586936560
TraesCS7B02G331700	Higher in J411	chr7B:586937082-586937535
TraesCS7B02G331700	Higher in J411	chr7B:586939406-586939648
TraesCS7B02G331700	Higher in J411	chr7B:586961878-586962027
TraesCS7B02G332200	Higher in J411	chr7B:587937433-587937701
TraesCS7B02G332200	Higher in J411	chr7B:587937942-587938675
TraesCS7B02G332200	Higher in J411	chr7B:587939514-587939727
TraesCS7B02G333400	Higher in J411	chr7B:588822543-588823021
TraesCS7B02G333400	Higher in J411	chr7B:588823188-588823409
TraesCS7B02G333400	Higher in J411	chr7B:588846573-588846882
TraesCS7B02G333400	Higher in J411	chr7B:588847251-588847596
TraesCS7B02G333400	Higher in J411	chr7B:588855240-588855457
TraesCS7B02G333400	Higher in J411	chr7B:588857544-588857957
TraesCS7B02G333400	Higher in J411	chr7B:588872683-588873403
TraesCS7B02G316900	Higher in J411	chr7B:566618891-566619464

## Sheet: TableS2D
DNA variations of DEGs in QMRL-7B
DEGs in QMRL-7B	DEG category	Promoter region of DEGs	Strand	Position of DNA variations
TraesCS7B02G234400	Higher in KN9204	chr7B:438784954-438787954	+	chr7B:438787747
TraesCS7B02G265000	Higher in KN9204	chr7B:485822581-485825581	+	chr7B:485824870
TraesCS7B02G265000	Higher in KN9204	chr7B:485822581-485825581	+	chr7B:485825446
TraesCS7B02G271000	Higher in KN9204	chr7B:497530714-497533714	-	chr7B:497530754
TraesCS7B02G271000	Higher in KN9204	chr7B:497530714-497533714	-	chr7B:497530817
TraesCS7B02G271000	Higher in KN9204	chr7B:497530714-497533714	-	chr7B:497530866
TraesCS7B02G271000	Higher in KN9204	chr7B:497530714-497533714	-	chr7B:497530884
TraesCS7B02G271000	Higher in KN9204	chr7B:497530714-497533714	-	chr7B:497531031
TraesCS7B02G271000	Higher in KN9204	chr7B:497530714-497533714	-	chr7B:497531032
TraesCS7B02G271000	Higher in KN9204	chr7B:497530714-497533714	-	chr7B:497531123
TraesCS7B02G271000	Higher in KN9204	chr7B:497530714-497533714	-	chr7B:497531266
TraesCS7B02G271000	Higher in KN9204	chr7B:497530714-497533714	-	chr7B:497531278
TraesCS7B02G271000	Higher in KN9204	chr7B:497530714-497533714	-	chr7B:497531365
TraesCS7B02G271000	Higher in KN9204	chr7B:497530714-497533714	-	chr7B:497531503
TraesCS7B02G271000	Higher in KN9204	chr7B:497530714-497533714	-	chr7B:497531556
TraesCS7B02G271000	Higher in KN9204	chr7B:497530714-497533714	-	chr7B:497531653
TraesCS7B02G271000	Higher in KN9204	chr7B:497530714-497533714	-	chr7B:497531660
TraesCS7B02G271000	Higher in KN9204	chr7B:497530714-497533714	-	chr7B:497531770
TraesCS7B02G271000	Higher in KN9204	chr7B:497530714-497533714	-	chr7B:497531804
TraesCS7B02G271000	Higher in KN9204	chr7B:497530714-497533714	-	chr7B:497532156
TraesCS7B02G271000	Higher in KN9204	chr7B:497530714-497533714	-	chr7B:497532233
TraesCS7B02G271000	Higher in KN9204	chr7B:497530714-497533714	-	chr7B:497532381
TraesCS7B02G271000	Higher in KN9204	chr7B:497530714-497533714	-	chr7B:497532400
TraesCS7B02G271000	Higher in KN9204	chr7B:497530714-497533714	-	chr7B:497532441
TraesCS7B02G271000	Higher in KN9204	chr7B:497530714-497533714	-	chr7B:497532460
TraesCS7B02G271000	Higher in KN9204	chr7B:497530714-497533714	-	chr7B:497532599
TraesCS7B02G271000	Higher in KN9204	chr7B:497530714-497533714	-	chr7B:497533267
TraesCS7B02G271000	Higher in KN9204	chr7B:497530714-497533714	-	chr7B:497533376
TraesCS7B02G271000	Higher in KN9204	chr7B:497530714-497533714	-	chr7B:497533403
TraesCS7B02G271000	Higher in KN9204	chr7B:497530714-497533714	-	chr7B:497533543
TraesCS7B02G271000	Higher in KN9204	chr7B:497530714-497533714	-	chr7B:497533710
TraesCS7B02G275800	Higher in KN9204	chr7B:504959136-504962136	+	chr7B:504959179
TraesCS7B02G275800	Higher in KN9204	chr7B:504959136-504962136	+	chr7B:504959237
TraesCS7B02G275800	Higher in KN9204	chr7B:504959136-504962136	+	chr7B:504959238
TraesCS7B02G275800	Higher in KN9204	chr7B:504959136-504962136	+	chr7B:504959267
TraesCS7B02G275800	Higher in KN9204	chr7B:504959136-504962136	+	chr7B:504959272
TraesCS7B02G275800	Higher in KN9204	chr7B:504959136-504962136	+	chr7B:504959274
TraesCS7B02G275800	Higher in KN9204	chr7B:504959136-504962136	+	chr7B:504959352
TraesCS7B02G275800	Higher in KN9204	chr7B:504959136-504962136	+	chr7B:504959410
TraesCS7B02G275800	Higher in KN9204	chr7B:504959136-504962136	+	chr7B:504959439
TraesCS7B02G275800	Higher in KN9204	chr7B:504959136-504962136	+	chr7B:504959568
TraesCS7B02G275800	Higher in KN9204	chr7B:504959136-504962136	+	chr7B:504959704
TraesCS7B02G275800	Higher in KN9204	chr7B:504959136-504962136	+	chr7B:504959807
TraesCS7B02G275800	Higher in KN9204	chr7B:504959136-504962136	+	chr7B:504959831
TraesCS7B02G275800	Higher in KN9204	chr7B:504959136-504962136	+	chr7B:504959880
TraesCS7B02G275800	Higher in KN9204	chr7B:504959136-504962136	+	chr7B:504959912
TraesCS7B02G275800	Higher in KN9204	chr7B:504959136-504962136	+	chr7B:504960016
TraesCS7B02G275800	Higher in KN9204	chr7B:504959136-504962136	+	chr7B:504960032
TraesCS7B02G275800	Higher in KN9204	chr7B:504959136-504962136	+	chr7B:504960264
TraesCS7B02G275800	Higher in KN9204	chr7B:504959136-504962136	+	chr7B:504960287
TraesCS7B02G275800	Higher in KN9204	chr7B:504959136-504962136	+	chr7B:504960318
TraesCS7B02G275800	Higher in KN9204	chr7B:504959136-504962136	+	chr7B:504960465
TraesCS7B02G275800	Higher in KN9204	chr7B:504959136-504962136	+	chr7B:504960492
TraesCS7B02G275800	Higher in KN9204	chr7B:504959136-504962136	+	chr7B:504960568
TraesCS7B02G275800	Higher in KN9204	chr7B:504959136-504962136	+	chr7B:504960588
TraesCS7B02G275800	Higher in KN9204	chr7B:504959136-504962136	+	chr7B:504960752
TraesCS7B02G275800	Higher in KN9204	chr7B:504959136-504962136	+	chr7B:504960773
TraesCS7B02G275800	Higher in KN9204	chr7B:504959136-504962136	+	chr7B:504960829
TraesCS7B02G275800	Higher in KN9204	chr7B:504959136-504962136	+	chr7B:504960856
TraesCS7B02G275800	Higher in KN9204	chr7B:504959136-504962136	+	chr7B:504960957
TraesCS7B02G275800	Higher in KN9204	chr7B:504959136-504962136	+	chr7B:504961004
TraesCS7B02G275800	Higher in KN9204	chr7B:504959136-504962136	+	chr7B:504961049
TraesCS7B02G275800	Higher in KN9204	chr7B:504959136-504962136	+	chr7B:504961063
TraesCS7B02G275800	Higher in KN9204	chr7B:504959136-504962136	+	chr7B:504961253
TraesCS7B02G275800	Higher in KN9204	chr7B:504959136-504962136	+	chr7B:504961555
TraesCS7B02G275800	Higher in KN9204	chr7B:504959136-504962136	+	chr7B:504961589
TraesCS7B02G275800	Higher in KN9204	chr7B:504959136-504962136	+	chr7B:504962014
TraesCS7B02G284300	Higher in KN9204	chr7B:518340295-518343295	-	chr7B:518340371
TraesCS7B02G284300	Higher in KN9204	chr7B:518340295-518343295	-	chr7B:518340921
TraesCS7B02G284300	Higher in KN9204	chr7B:518340295-518343295	-	chr7B:518341043
TraesCS7B02G284300	Higher in KN9204	chr7B:518340295-518343295	-	chr7B:518341176
TraesCS7B02G284300	Higher in KN9204	chr7B:518340295-518343295	-	chr7B:518341218
TraesCS7B02G284300	Higher in KN9204	chr7B:518340295-518343295	-	chr7B:518341334
TraesCS7B02G284300	Higher in KN9204	chr7B:518340295-518343295	-	chr7B:518341397
TraesCS7B02G284300	Higher in KN9204	chr7B:518340295-518343295	-	chr7B:518341440
TraesCS7B02G284300	Higher in KN9204	chr7B:518340295-518343295	-	chr7B:518341736
TraesCS7B02G284300	Higher in KN9204	chr7B:518340295-518343295	-	chr7B:518341754
TraesCS7B02G284300	Higher in KN9204	chr7B:518340295-518343295	-	chr7B:518341779
TraesCS7B02G284300	Higher in KN9204	chr7B:518340295-518343295	-	chr7B:518341934
TraesCS7B02G284300	Higher in KN9204	chr7B:518340295-518343295	-	chr7B:518342113
TraesCS7B02G284300	Higher in KN9204	chr7B:518340295-518343295	-	chr7B:518342325
TraesCS7B02G284300	Higher in KN9204	chr7B:518340295-518343295	-	chr7B:518342362
TraesCS7B02G284300	Higher in KN9204	chr7B:518340295-518343295	-	chr7B:518342408
TraesCS7B02G284300	Higher in KN9204	chr7B:518340295-518343295	-	chr7B:518342417
TraesCS7B02G284300	Higher in KN9204	chr7B:518340295-518343295	-	chr7B:518342443
TraesCS7B02G284300	Higher in KN9204	chr7B:518340295-518343295	-	chr7B:518342469
TraesCS7B02G284300	Higher in KN9204	chr7B:518340295-518343295	-	chr7B:518342556
TraesCS7B02G284300	Higher in KN9204	chr7B:518340295-518343295	-	chr7B:518342649
TraesCS7B02G284300	Higher in KN9204	chr7B:518340295-518343295	-	chr7B:518342704
TraesCS7B02G284300	Higher in KN9204	chr7B:518340295-518343295	-	chr7B:518342759
TraesCS7B02G284300	Higher in KN9204	chr7B:518340295-518343295	-	chr7B:518342851
TraesCS7B02G284300	Higher in KN9204	chr7B:518340295-518343295	-	chr7B:518342876
TraesCS7B02G284300	Higher in KN9204	chr7B:518340295-518343295	-	chr7B:518342925
TraesCS7B02G284300	Higher in KN9204	chr7B:518340295-518343295	-	chr7B:518343004
TraesCS7B02G284300	Higher in KN9204	chr7B:518340295-518343295	-	chr7B:518343015
TraesCS7B02G284300	Higher in KN9204	chr7B:518340295-518343295	-	chr7B:518343043
TraesCS7B02G284300	Higher in KN9204	chr7B:518340295-518343295	-	chr7B:518343127
TraesCS7B02G284300	Higher in KN9204	chr7B:518340295-518343295	-	chr7B:518343222
TraesCS7B02G284300	Higher in KN9204	chr7B:518340295-518343295	-	chr7B:518343256
TraesCS7B02G284300	Higher in KN9204	chr7B:518340295-518343295	-	chr7B:518343283
TraesCS7B02G285600	Higher in KN9204	chr7B:519914742-519917742	-	chr7B:519914995
TraesCS7B02G285600	Higher in KN9204	chr7B:519914742-519917742	-	chr7B:519915373
TraesCS7B02G285600	Higher in KN9204	chr7B:519914742-519917742	-	chr7B:519915484
TraesCS7B02G285600	Higher in KN9204	chr7B:519914742-519917742	-	chr7B:519915522
TraesCS7B02G285600	Higher in KN9204	chr7B:519914742-519917742	-	chr7B:519915559
TraesCS7B02G285600	Higher in KN9204	chr7B:519914742-519917742	-	chr7B:519915589
TraesCS7B02G285600	Higher in KN9204	chr7B:519914742-519917742	-	chr7B:519915693
TraesCS7B02G285600	Higher in KN9204	chr7B:519914742-519917742	-	chr7B:519915706
TraesCS7B02G285600	Higher in KN9204	chr7B:519914742-519917742	-	chr7B:519915844
TraesCS7B02G285600	Higher in KN9204	chr7B:519914742-519917742	-	chr7B:519915859
TraesCS7B02G285600	Higher in KN9204	chr7B:519914742-519917742	-	chr7B:519915973
TraesCS7B02G285600	Higher in KN9204	chr7B:519914742-519917742	-	chr7B:519916117
TraesCS7B02G285600	Higher in KN9204	chr7B:519914742-519917742	-	chr7B:519916118
TraesCS7B02G285600	Higher in KN9204	chr7B:519914742-519917742	-	chr7B:519916193
TraesCS7B02G285600	Higher in KN9204	chr7B:519914742-519917742	-	chr7B:519916230
TraesCS7B02G285600	Higher in KN9204	chr7B:519914742-519917742	-	chr7B:519916273
TraesCS7B02G285600	Higher in KN9204	chr7B:519914742-519917742	-	chr7B:519916322
TraesCS7B02G285600	Higher in KN9204	chr7B:519914742-519917742	-	chr7B:519916389
TraesCS7B02G285600	Higher in KN9204	chr7B:519914742-519917742	-	chr7B:519916423
TraesCS7B02G285600	Higher in KN9204	chr7B:519914742-519917742	-	chr7B:519916519
TraesCS7B02G285600	Higher in KN9204	chr7B:519914742-519917742	-	chr7B:519916643
TraesCS7B02G285600	Higher in KN9204	chr7B:519914742-519917742	-	chr7B:519916688
TraesCS7B02G285600	Higher in KN9204	chr7B:519914742-519917742	-	chr7B:519916729
TraesCS7B02G285600	Higher in KN9204	chr7B:519914742-519917742	-	chr7B:519916847
TraesCS7B02G285600	Higher in KN9204	chr7B:519914742-519917742	-	chr7B:519916868
TraesCS7B02G285600	Higher in KN9204	chr7B:519914742-519917742	-	chr7B:519916903
TraesCS7B02G285600	Higher in KN9204	chr7B:519914742-519917742	-	chr7B:519917048
TraesCS7B02G285600	Higher in KN9204	chr7B:519914742-519917742	-	chr7B:519917126
TraesCS7B02G285600	Higher in KN9204	chr7B:519914742-519917742	-	chr7B:519917199
TraesCS7B02G285600	Higher in KN9204	chr7B:519914742-519917742	-	chr7B:519917222
TraesCS7B02G285600	Higher in KN9204	chr7B:519914742-519917742	-	chr7B:519917272
TraesCS7B02G285600	Higher in KN9204	chr7B:519914742-519917742	-	chr7B:519917407
TraesCS7B02G285600	Higher in KN9204	chr7B:519914742-519917742	-	chr7B:519917428
TraesCS7B02G285600	Higher in KN9204	chr7B:519914742-519917742	-	chr7B:519917629
TraesCS7B02G285600	Higher in KN9204	chr7B:519914742-519917742	-	chr7B:519917641
TraesCS7B02G285800	Higher in KN9204	chr7B:521123735-521126735	-	chr7B:521124077
TraesCS7B02G285800	Higher in KN9204	chr7B:521123735-521126735	-	chr7B:521124096
TraesCS7B02G285800	Higher in KN9204	chr7B:521123735-521126735	-	chr7B:521124233
TraesCS7B02G285800	Higher in KN9204	chr7B:521123735-521126735	-	chr7B:521124342
TraesCS7B02G285800	Higher in KN9204	chr7B:521123735-521126735	-	chr7B:521124906
TraesCS7B02G257400	Higher in J411	chr7B:477780388-477783388	-	chr7B:477781400
TraesCS7B02G265900	Higher in J411	chr7B:488401785-488404785	+	chr7B:488403621
