# Supplementary material for: Epigenetic modifications regulate cultivar-specific root development and metabolic adaptation to nitrogen availability in wheat
Source: Research Square preprint supplement (doi:10.21203/rs.3.rs-2801336/v1), 2023-04-20
Supplement: Supplementary file 3 [file 64a63836ef61c27bd311c76b.xlsx]

## Sheet: TableS1A
Differential expressed NMGs
Tissue	Gene ID	Family	Gene_name	Expression-KN9204_NN (TPM)	Expression-KN9204_LN (TPM)	Expression-J411_NN (TPM)	Expression-J411_LN (TPM)
Root	TraesCS6A02G031200	NRT2	TaNRT2_6A	4.543	286.074	1.504	363.339
Root	TraesCS6D02G035600	NRT2	TaNRT2_6D	4.38667	312.149	0.597	419.49
Root	TraesCS4D02G097400	APC		1.78567	4.97767	0.509667	5.183
Root	TraesCS6A02G333900	NIR		77.1907	62.3227	70.9493	205.033
Root	TraesCS6B02G024900	NIA		48.087	36.868	54.589	142.227
Root	TraesCS6D02G035800	NRT2		9.377	6.28467	3.024	42.612
Root	TraesCS6B02G044300	NRT2	TaNRT2_6B	19.1283	12.1687	5.29467	70.4813
Root	TraesCS6A02G030900	NRT2		7.11767	8.23233	1.59133	40.4273
Root	TraesCS6B02G044200	NRT2		0.787667	3.42933	0.189333	80.9403
Root	TraesCS6B02G044100	NRT2		0.910667	6.54567	0.778667	193.104
Root	TraesCS6D02G313100	NIR		92.162	102.203	80.71	299.468
Root	TraesCS7D02G366200	APC		4.99167	2.077	3.62033	9.02633
Root	TraesCS6D02G306000	NIA		86.9237	114.51	94.606	305.079
Root	TraesCS6B02G356800	NIA		28.7393	45.6217	29.4697	186.622
Root	TraesCS6A02G031000	NRT2		0.253333	1.57533	0.0993333	8.887
Root	TraesCS6D02G035700	NRT2		2.978	13.3773	0.573	91.2657
Root	TraesCS6B02G044400	NRT2		3.456	17.8843	1.00667	72.771
Root	TraesCS6A02G326200	NIA		30.8733	51.8513	20.62	169.6
Root	TraesCS6A02G017500	NIA		34.8203	100.258	30.1963	238.084
Root	TraesCS6D02G035900	NRT2		6.50667	15.9747	2.49367	48.7403
Root	TraesCS6A02G031100	NRT2		0.411333	7.074	0.141667	24.2043
Root	TraesCS6B02G126800	CLC		1.09767	12.5507	0.611	44.2707
Root	TraesCS6B02G044000	NRT2		2.388	134.282	0.888667	535.305
Root	TraesCS6A02G098600	CLC		2.57833	27.165	0.855667	102.562
Root	TraesCS3D02G480000	APC		0.167	1.40467	0.427667	4.171
Root	TraesCS4A02G440700	NPF		0.434667	1.73167	1.02067	4.53367
Root	TraesCS2D02G529000	TF		21.5323	39.978	42.3497	96.783
Root	TraesCS3A02G096000	APC		0.729333	1.617	2.77167	11.915
Root	TraesCS7D02G507300	APC		16.875	16.8313	21.51	35.746
Root	TraesCS1B02G212200	NPF		6.59333	17.326	12.2183	24.7173
Root	TraesCS3D02G333100	TF		2.24733	4.52667	7.85367	6.33567
Root	TraesCS2B02G326900	CLC		13.7463	7.75133	45.8763	36.4587
Root	TraesCS4D02G195100	ASN		5.86033	4.81333	37.762	35.102
Root	TraesCS1A02G422100	ASN		4.17833	3.937	8.26467	8.26033
Root	TraesCS4B02G047400	GS		0.488667	0.275	1.275	1.40733
Root	TraesCS2B02G626100	NPF		0	0.012	0.457333	0.664333
Root	TraesCS4B02G035500	CLC		1.57067	1.714	3.48233	4.396
Root	TraesCS6A02G142600	NPF		0.034	0.182	1.00433	1.56
Root	TraesCS3B02G225800	TF		7.274	8.149	14.3163	19.8027
Root	TraesCS7D02G378300	NPF		21.2193	9.79	21.188	3.799
Root	TraesCS5B02G406300	TF		24.5457	2.951	27.9447	9.62733
Root	TraesCS5A02G401600	TF		57.0657	9.88667	60.3	23.4467
Root	TraesCS5D02G411800	TF		49.1643	5.67067	56.1783	24.319
Root	TraesCS1A02G211000	NPF		6.57433	0.641667	8.49	2.54867
Root	TraesCS4D02G077600	TF		240.595	77.9967	255.216	207.745
Root	TraesCS4B02G078800	TF		146.475	41.1323	145.38	129.709
Root	TraesCS4A02G236200	TF		128.697	42.362	128.056	128.901
Root	TraesCS5B02G075300	TF		38.1693	9.74033	27.284	26.203
Root	TraesCS7D02G295400	TF		9.274	15.9983	18.9787	12.689
Root	TraesCS3A02G382100	NPF		14.229	9.131	37.382	7.24133
Root	TraesCS3D02G375900	NPF		16.688	5.61233	41.7407	4.62467
Root	TraesCS5A02G315000	APC		3.39767	2.03667	8.124	4.178
Root	TraesCS7B02G020500	NPF		8.67367	15.6643	1.724	6.34933
Root	TraesCS4D02G233300	NPF		9.266	14.3903	4.05433	6.86467
Root	TraesCS2A02G268400	APC		81.192	124.024	38.9823	76.7887
Root	TraesCS7B02G283400	NPF		4.60067	7.21267	1.46033	4.331
Root	TraesCS5A02G388000	NPF		1.86633	3.24633	0.289667	1.69633
Root	TraesCS3B02G178600	SLAH		0.708667	0.805333	0.0146667	0.182333
Root	TraesCS4A02G440600	NPF		19.726	25.6453	3.015	6.61
Root	TraesCS2B02G626000	NPF		7.95633	13.8507	4.72633	1.35967
Root	TraesCS2B02G626600	NPF		2.682	3.78767	1.59	1.113
Root	TraesCS2D02G519000	CLC		1.23567	1.90967	0.585667	0.729333
Root	TraesCS3B02G424700	NPF		6.00067	8.44533	3.54533	3.78267
Root	TraesCS4D02G134400	APC		6.93333	14.0013	0	0.0153333
Root	TraesCS4A02G440300	NPF		1.42867	3.51467	0.031	0
Root	TraesCS3D02G376300	NPF		1.64433	2.76467	0.906333	0.739333
Root	TraesCS2B02G626700	NPF		1.65533	5.214	0.481667	0.204667
Root	TraesCS7A02G381700	NPF		0.844333	3.43033	0	0.0286667
Root	TraesCS7B02G311400	NPF		5.50033	9.65633	3.99567	4.12567
Root	TraesCS5A02G115800	APC		55.4507	119.556	15.3817	30.4523
Root	TraesCS3A02G056400	NPF		2.88767	13.3723	1.104	2.04
Root	TraesCS3A02G484862	APC		1.04433	6.888	0.218333	3.11767
Root	TraesCS2A02G007500	NPF		4.86567	23.1033	3.89233	11.6477
Root	TraesCS7B02G020300	NPF	TaNPF2.3_7B	0.824	7.921	0.201	3.478
Root	TraesCS1A02G150200	NPF		1.67633	2.43733	0.516	1.72567
Root	TraesCS2D02G583600	NPF		2.42967	4.248	0.624667	2.67467
Root	TraesCS7A02G121700	NPF	TaNPF2.3_7A	8.23233	12.5557	3.164	10.1697
Root	TraesCS7D02G120200	NPF	TaNPF2.3_7D	11.068	16.272	4.21	12.6153
Root	TraesCS2B02G013000	NPF		2.40233	5.418	0.863	3.593
Root	TraesCS1D02G147200	NPF		1.78967	2.58467	0.574333	2.40067
Root	TraesCS7A02G054000	NPF		31.044	16.5867	11.526	14.0873
Root	TraesCS1B02G225000	NPF		6.49133	1.62733	1.599	2.697
Root	TraesCS1A02G210900	NPF		11.7167	0	3.13367	0.284333
Root	TraesCS2A02G074800	NRT2		3.501	1.19467	1.446	0.835
Root	TraesCS7D02G049300	NPF		11.6393	7.833	1.02167	2.323
Root	TraesCS2A02G565600	NPF		14.6543	10.6993	2.603	3.694
Root	TraesCS2D02G500600	GS		105.953	76.615	7.52233	6.898
Root	TraesCS7B02G100100	APC		4.575	3.02333	0	0.0163333
Root	TraesCS2D02G500000	APC		21.2667	15.974	4.79	5.44033
Root	TraesCS1B02G459700	APC		1.24867	1.32733	0.11	0.256667
Root	TraesCS3D02G159600	SLAH		0.830667	0.841	0.028	0.196
Root	TraesCS4A02G215300	APC		1.78767	1.13367	0.232333	1.755
Leaf	TraesCS3D02G333100	TF	TaNAC2_3D	1.51813	2.74779	1.04163	0.752894
Leaf	TraesCS6D02G020700	NIA	TaNIA_6D	28.4353	75.0307	24.8854	21.524
Leaf	TraesCS5D02G411800	TF	TaHHO_5D	10.4127	15.0641	11.0481	4.44075
Leaf	TraesCS5A02G401600	TF	TaHHO_5A	16.2373	28.6481	16.7935	5.79727
Leaf	TraesCS2A02G264800	TF	TaHHO_2A.1	68.3244	84.149	60.4149	47.5894
Leaf	TraesCS6A02G017500	NIA	TaNIA_6A	23.9337	50.4102	27.7594	24.2477
Leaf	TraesCS2A02G116100	TF	TaHHO_2A.2	3.07654	19.3269	6.52461	4.46554
Leaf	TraesCS2D02G119100	TF	TaHHO_2D	1.41001	14.7312	2.53896	2.23816
Leaf	TraesCS2B02G135600	TF	TaHHO_2B	0.711693	10.1895	3.82182	3.9046
Leaf	TraesCS5D02G012500	NPF	TaGTR2_5D	2.12615	3.67899	4.65236	9.82698
Leaf	TraesCS3B02G420700	APC	TaAAP1_3B	0.736061	0.811777	1.69529	3.08708
Leaf	TraesCS2B02G626600	NPF	TaNPF5.10_2B	0.693481	0.685777	1.75727	2.40424
Leaf	TraesCS5A02G508500	NPF	TaPTR3_5A	1.1937	1.53462	1.04915	5.04423
Leaf	TraesCS7D02G366200	APC	TaAAP1_7D	1.99234	2.79201	18.0803	21.3868
Leaf	TraesCS6A02G175800	TF	TaHY5_6A	15.648	18.7039	34.0979	35.3612
Leaf	TraesCS5A02G434100	GDH		0.043732	0.142407	0.219947	1.90053
Leaf	TraesCS1B02G280000	NPF		1.49745	2.18696	1.45814	5.61461
Leaf	TraesCS7A02G206400	NPF		2.31292	6.43196	5.87895	10.8142
Leaf	TraesCS5D02G442000	GDH		0.192003	1.30854	1.06439	2.42004
Leaf	TraesCS2A02G251800	TF		1.18483	1.06	8.46725	2.22975
Leaf	TraesCS2B02G271700	TF		1.87827	2.94189	7.04085	3.62718
Leaf	TraesCS5B02G480900	TF		22.6684	28.8088	78.3995	55.3608
Leaf	TraesCS1D02G433200	SLAH		0.0913382	0.0724358	0.719051	0.420832
Leaf	TraesCS3B02G402200	APC		0.103822	0.0969282	1.04179	0.614329
Leaf	TraesCS1D02G432900	SLAH		0.115187	0.054422	1.01287	0.53057
Leaf	TraesCS4B02G035500	CLC		1.68885	2.36739	4.90274	4.14815
Leaf	TraesCS7D02G189100	APC		0.238449	0.476876	1.72547	1.53711
Leaf	TraesCS5A02G468300	TF		15.8751	19.5495	50.9408	46.0523
Leaf	TraesCS5D02G481200	TF		22.4545	27.3996	67.1115	59.7559
Leaf	TraesCS7D02G309400	APC		17.7047	20.1235	42.7322	39.8996
Leaf	TraesCS5A02G115100	APC		8.05577	10.2516	26.182	22.432
Leaf	TraesCS7A02G531000	NPF		5.71805	6.32247	21.2887	18.4053
Leaf	TraesCS6A02G348400	APC		4.06585	1.36213	7.67984	5.86857
Leaf	TraesCS2A02G406000	APC		0.869718	1.88711	3.42664	2.92553
Leaf	TraesCS1A02G211000	NPF		1.84185	6.5926	8.60571	7.87785
Leaf	TraesCS6B02G271500	APC		4.62393	4.05865	10.1616	15.817
Leaf	TraesCS2A02G309100	NPF		0.56404	0.155669	1.71466	2.49566
Leaf	TraesCS6A02G254100	APC		2.4844	1.28704	9.35841	13.0761
Leaf	TraesCS2B02G626100	NPF		0	0	1.81019	2.50427
Leaf	TraesCS1D02G256700	NPF		0.358334	0.0736396	2.87624	3.7742
Leaf	TraesCS3A02G096000	APC		0.33879	0.294622	1.87061	2.18715
Leaf	TraesCS5B02G023300	APC		5.32303	7.56093	26.2287	29.5525
Leaf	TraesCS7B02G312600	NPF		1.00635	1.21339	8.96378	9.37245
Leaf	TraesCS5B02G079100	APC		6.21934	7.8009	16.1538	16.4922
Leaf	TraesCS5D02G125700	APC		16.1617	20.5723	43.8647	43.4786
Leaf	TraesCS6D02G235500	APC		7.3354	8.27053	18.5179	17.4353
Leaf	TraesCS3D02G402300	APC		0.298968	0.172054	1.31027	1.29092
Leaf	TraesCS2D02G362900	AMT		66.6324	59.8003	106.652	107.746
Leaf	TraesCS2D02G402900	APC		0.775047	1.93484	3.05364	3.22262
Leaf	TraesCS4D02G077600	TF		5.0553	3.3128	7.76992	0.680149
Leaf	TraesCS2B02G065200	APC		0.768306	0.316283	0.808303	0
Leaf	TraesCS4B02G029600	NPF		12.0454	16.1034	16.7881	8.96172
Leaf	TraesCS4A02G236200	TF		3.68675	4.09644	5.81721	1.41183
Leaf	TraesCS5B02G406300	TF		15.612	16.675	17.0379	5.32229
Leaf	TraesCS2A02G499800	APC		0.0247929	0.590696	0.954734	0.252618
Leaf	TraesCS6B02G024900	NIA		17.2318	29.7887	37.3525	19.1129
Leaf	TraesCS1A02G295300	AMT		0.567367	1.33123	2.27211	0.956026
Leaf	TraesCS3A02G369200	APC		28.4194	36.8802	14.697	18.7145
Leaf	TraesCS7A02G381700	NPF		0.756252	1.08095	0.0564035	0.136528
Leaf	TraesCS6D02G003200	APC		8.836	11.326	4.39846	5.08243
Leaf	TraesCS2D02G256000	APC		0.813059	1.5865	0	0
Leaf	TraesCS2B02G626000	NPF		7.55189	12.6896	1.62409	1.93631
Leaf	TraesCS6D02G306000	NIA		1.36772	2.83955	0.129237	0.16731
Leaf	TraesCS2A02G268200	APC		5.61015	8.36171	2.32106	1.87289
Leaf	TraesCS5A02G115800	APC		2.89679	4.59292	0.591895	0.406336
Leaf	TraesCS6A02G333900	NIR		55.5743	96.4428	44.0356	28.2947
Leaf	TraesCS3A02G225100	SLAH		3.11333	8.45061	0.837789	1.81725
Leaf	TraesCS4A02G440600	NPF		1.16383	3.44324	0.174015	0.48483
Leaf	TraesCS3B02G424700	NPF		3.25239	7.14846	2.64769	2.97696
Leaf	TraesCS3B02G254700	SLAH		1.94132	7.79259	0.597798	0.908357
Leaf	TraesCS2A02G338800	APC		3.77022	8.43098	1.4057	4.13581
Leaf	TraesCS3D02G385700	NPF		1.76018	4.28875	0.644334	1.63303
Leaf	TraesCS3D02G228400	SLAH		0.663243	2.42865	0.341855	0.770767
Leaf	TraesCS6D02G313100	NIR		85.6196	125.635	79.9206	49.9545
Leaf	TraesCS1B02G225000	NPF		15.994	20.6016	13.9412	10.5883
Leaf	TraesCS3A02G382100	NPF		0.76386	0.639722	0.116316	0.579041
Leaf	TraesCS4D02G134400	APC		9.97544	10.6687	0	0
Leaf	TraesCS3A02G056400	NPF		12.7937	17.5499	0.498484	0.841591
Leaf	TraesCS6A02G326200	NIA		0.600487	0.810883	0.0808063	0.0773722
Leaf	TraesCS4B02G090800	NPF		0.628592	0.490587	0.0449106	0.056054
Leaf	TraesCS2D02G500600	GS		619.389	558.479	53.1632	67.8725
Leaf	TraesCS7B02G433400	APC		2.20171	2.48609	1.54973	0.804779
Leaf	TraesCS2A02G443700	NPF		14.0748	15.4416	12.6597	7.68383
Leaf	TraesCS5B02G414000	NPF		18.3732	15.0746	12.8843	7.54288
Leaf	TraesCS5B02G457100	CLC		9.15213	6.89634	4.78498	1.58597
Leaf	TraesCS5A02G449500	CLC		7.42312	5.31127	3.59355	1.37166
Leaf	TraesCS7B02G188000	TF		44.1274	38.7091	25.2468	15.4525
Leaf	TraesCS7A02G299400	TF		97.6059	89.3252	61.327	40.05
Leaf	TraesCS7D02G295400	TF		62.9363	58.7196	35.9766	21.8299
Leaf	TraesCS2A02G007500	NPF		30.4603	19.8248	14.4054	10.2669
Seed	TraesCS5A02G037900	NPF		0.108015	1.079	0.0849883	0.138566
Seed	TraesCS2A02G565600	NPF	TaNPF5.10_2A	3.39045	5.97876	1.62656	1.52547
Seed	TraesCS2D02G500600	GS	TaGS_2D	0.880946	2.08863	0.17491	0.0353004
Seed	TraesCS7B02G433400	APC		3.0155	5.69413	1.77266	1.49401
Seed	TraesCS2B02G626700	NPF	TaNPF5.10_2B	1.34448	2.61415	0.119189	0.0937942
Seed	TraesCS4B02G194400	ASN		1.18313	1.23903	0.189537	0.0523285
Seed	TraesCS7B02G201900	NPF	TaNRT1.1_7B	1.60617	1.72026	0.308523	0.301217
Seed	TraesCS2D02G519000	CLC	TaCLCG_2D	1.86409	1.74828	0.406361	0.516104
Seed	TraesCS4D02G134400	APC		5.30607	5.12093	0	0
Seed	TraesCS7D02G297000	NPF	TaNRT1.1_7D	1.67563	1.9864	0.432897	0.65906
Seed	TraesCS7B02G311400	NPF		0.529392	0.782018	0.035447	0.138047
Seed	TraesCS5A02G434100	GDH		2.00477	1.69206	0.451537	0.617836
Seed	TraesCS7A02G299400	TF		8.82297	6.69829	1.04144	0.96581
Seed	TraesCS7D02G295400	TF		8.72043	6.1786	0.538715	0.333692
Seed	TraesCS5A02G449500	CLC		4.9964	4.30259	0.729364	0.444022
Seed	TraesCS2B02G152900	GOGAT	TaGOGAT_2B	7.99584	4.21451	1.67668	0.935844
Seed	TraesCS5B02G457100	CLC		1.99404	1.27301	0.149512	0.164634
Seed	TraesCS7B02G188000	TF		10.3853	6.9351	0.876156	0.54355
Seed	TraesCS2D02G132900	GOGAT	TaGOGAT_2D	6.90054	4.52785	1.34877	0.896951
Seed	TraesCSU02G130200	NPF		6.61701	14.3673	13.2273	13.1858
Seed	TraesCS3B02G420700	APC	TaAAP1_3B	0.401209	2.23033	1.9848	2.61397
Seed	TraesCS2A02G500400	GS	TaGS_2A	0.390314	1.07383	1.4606	1.48015
Seed	TraesCS5A02G485000	NPF		0.602084	1.94268	2.10508	2.50154
Seed	TraesCS3A02G436100	TF		1.01664	2.42844	2.88839	3.1547
Seed	TraesCS7B02G213000	APC		2.49624	3.55595	5.89896	4.53813
Seed	TraesCS7B02G312600	NPF		0	0.0135672	0.593343	0.561025
Seed	TraesCS7B02G100100	APC		4.27965	4.39966	10.1495	10.4572
Seed	TraesCS1B02G124600	TF		1.92644	2.46749	107.427	113.679
Seed	TraesCS7D02G507300	APC		1.1641	1.58353	3.56254	3.80855
Seed	TraesCS3A02G096000	APC		0.178185	0.389009	1.90046	2.2049
Seed	TraesCS6A02G269200	APC		1.76473	2.50136	4.6563	4.95804
Seed	TraesCS3D02G333100	TF		2.56623	4.06908	9.15997	10.0047
Seed	TraesCS7D02G366200	APC		1.16858	1.95636	4.21386	5.07324
Seed	TraesCS5A02G485300	NPF		1.7006	4.13515	6.94987	7.4565
Seed	TraesCS7D02G196100	APC		1.88507	4.4138	8.85672	10.032
Seed	TraesCS2D02G576000	NPF		0.605071	1.14824	1.87112	2.07941
Seed	TraesCS7A02G194500	APC		3.02035	5.4634	10.8684	10.6653

## Sheet: TableS1B
Differential H3K27ac peaks of NMGs
Tissue	Diff_H3K27ac_peaks	H3K27ac_KN9204_NN(FPKM)	H3K27ac_KN9204_LN(FPKM)	H3K27ac_J411_NN(FPKM)	H3K27ac_J411_LN(FPKM)	Gene ID	Family
Root	chr1B:151075941-151076091	0.149	0.344	1.027	0.213	TraesCS1B02G124600	TF
Root	chr1B:151075296-151075812	0.303	0.46	0.896	0.433	TraesCS1B02G124600	TF
Root	chr1A:445509149-445509928	0.416	0.729	1.602	0.716	TraesCS1A02G253600	TF
Root	chr1A:445510286-445511263	0.595	0.73	1.262	0.424	TraesCS1A02G253600	TF
Root	chr1A:458216757-458217240	0.601	0.62	0.51	0.198	TraesCS1A02G262700	TF
Root	chr7B:701189653-701191110	0.989	1.007	1.121	2.779	TraesCS7B02G433800	TF
Root	chr7B:701186556-701186706	0.819	0.826	1.541	2.763	TraesCS7B02G433800	TF
Root	chr1B:465384313-465384560	1.176	1.422	2.37	0.71	TraesCS1B02G264600	TF
Root	chr1B:465385174-465385349	1.66	2.125	1.937	0.911	TraesCS1B02G264600	TF
Root	chr1B:480444770-480445127	0.407	0.376	1.036	0.089	TraesCS1B02G273300	TF
Root	chr1D:100655075-100655567	1.181	1.386	1.66	0.259	TraesCS1D02G107600	TF
Root	chr1D:100652707-100653162	0.81	0.976	1.592	0.315	TraesCS1D02G107600	TF
Root	chr1D:100654779-100654963	0.546	0.618	1.758	0.347	TraesCS1D02G107600	TF
Root	chr1D:100652019-100652306	0.311	0.648	0.805	0.611	TraesCS1D02G107600	TF
Root	chr1D:345407135-345407770	0.915	1.074	2.475	1.155	TraesCS1D02G253200	TF
Root	chr1D:356935492-356935812	0.559	0.484	0.289	0.498	TraesCS1D02G262700	TF
Root	chr2A:382806942-382807568	1.017	1.502	1.378	3.107	TraesCS2A02G251800	TF
Root	chr2A:382807987-382808181	0.576	0.799	0.953	2.383	TraesCS2A02G251800	TF
Root	chr2A:382808603-382808798	1.203	1.06	1.343	1.799	TraesCS2A02G251800	TF
Root	chr2B:373302872-373303213	1.016	1.181	1.31	3.927	TraesCS2B02G271700	TF
Root	chr2B:373302313-373302673	0.745	0.947	1.241	2.834	TraesCS2B02G271700	TF
Root	chr2A:420227958-420228118	2.164	0.452	0.867	0.399	TraesCS2A02G264800	TF
Root	chr2A:420225578-420225885	2.038	0.639	1.556	1.246	TraesCS2A02G264800	TF
Root	chr2A:662902138-662902448	0.937	1.233	1.491	0.463	TraesCS2A02G407200	TF
Root	chr2A:746687942-746688279	2.055	2.023	1.692	6.292	TraesCS2A02G526300	TF
Root	chr2B:102125130-102126093	0.766	0.654	1.232	0.381	TraesCS2B02G135600	TF
Root	chr2B:383058052-383058397	1.198	0.689	1.786	1.294	TraesCS2B02G277300	TF
Root	chr2B:751324000-751324367	1.4	1.576	1.05	4.692	TraesCS2B02G556600	TF
Root	chr2D:616531280-616531647	1.613	1.97	1.973	5.387	TraesCS2D02G529000	TF
Root	chr3A:159422677-159423107	0.961	2.186	2.401	3.782	TraesCS3A02G159600	TF
Root	chr3A:159419461-159419745	0.983	2.364	1.573	2.807	TraesCS3A02G159600	TF
Root	chr3A:333305580-333305909	0.611	0.251	0	0.145	TraesCS3A02G200900	TF
Root	chr3A:333320074-333320255	0.185	0.228	0.085	0.881	TraesCS3A02G200900	TF
Root	chr3A:333308920-333309101	0.185	0.228	0.255	0.881	TraesCS3A02G200900	TF
Root	chr3A:333315373-333315528	0.216	0.533	0.298	0.617	TraesCS3A02G200900	TF
Root	chr3A:333323745-333324422	0.33	0.275	0.455	0.706	TraesCS3A02G200900	TF
Root	chr3D:543005528-543005748	1.574	0.61	0.77	0.507	TraesCS3D02G428700	TF
Root	chr3B:202925065-202925430	1.255	0.34	0.127	2.446	TraesCS3B02G190300	TF
Root	chr3B:312177921-312178123	0.553	1.023	0.153	0.868	TraesCS3B02G225800	TF
Root	chr3B:312187587-312187982	0.481	0.837	0.39	0.686	TraesCS3B02G225800	TF
Root	chr3D:141203289-141203689	1.62	2.918	1.117	4.942	TraesCS3D02G166900	TF
Root	chr3D:250929012-250929203	0.175	0.27	0	1.002	TraesCS3D02G203000	TF
Root	chr3D:250933002-250933162	1.047	0.517	0.096	0.598	TraesCS3D02G203000	TF
Root	chr3D:250930397-250930731	0	0	0	0	TraesCS3D02G203000	TF
Root	chr3D:250930323-250930770	0.05	0.046	0.034	0.107	TraesCS3D02G203000	TF
Root	chr3D:250927060-250927403	0.195	0.211	0.225	0.511	TraesCS3D02G203000	TF
Root	chr4A:544953605-544953824	2.346	1.415	2.04	1.82	TraesCS4A02G236200	TF
Root	chr5A:77327505-77327801	2	0.907	3.487	2.531	TraesCS5A02G068900	TF
Root	chr5A:77328390-77328787	1.576	0.729	0.776	1.606	TraesCS5A02G068900	TF
Root	chr5B:89684998-89685850	0.983	0.921	2.532	1.272	TraesCS5B02G075300	TF
Root	chr5B:89684144-89684300	1.074	0.795	2.469	0.92	TraesCS5B02G075300	TF
Root	chr5D:81150647-81151466	1.064	0.706	2.521	0.876	TraesCS5D02G081000	TF
Root	chr5D:81149040-81149345	0.11	0	0	0	TraesCS5D02G081000	TF
Root	chr5D:81149049-81149418	0.182	0.028	0.042	0.302	TraesCS5D02G081000	TF
Root	chr5D:81149634-81149914	0.718	0.517	1.816	0.626	TraesCS5D02G081000	TF
Root	chr6B:276515201-276515666	0.625	0.4	0.265	1.2	TraesCS6B02G209600	TF
Root	chr6A:567934374-567934575	1.612	1.079	0.613	2.697	TraesCS6A02G335400	TF
Root	chr6B:638831176-638832088	1.017	0.782	0.98	1.94	TraesCS6B02G366100	TF
Root	chr6B:638833294-638833448	1.886	0.604	0.6	1.035	TraesCS6B02G366100	TF
Root	chr7A:409867280-409867569	0.58	0.608	0.853	1.71	TraesCS7A02G299400	TF
Root	chr7A:409874846-409874996	0.521	0.895	0.822	0.638	TraesCS7A02G299400	TF
Root	chr7A:409877229-409877392	1.028	1.141	1.323	1.272	TraesCS7A02G299400	TF
Root	chr7A:537663027-537663885	0.495	0.674	0.952	0.242	TraesCS7A02G363100	TF
Root	chr7A:553036674-553037024	0.766	0.531	0.308	1.048	TraesCS7A02G377600	TF
Root	chr7B:485429812-485430648	0.681	0.729	1.253	0.133	TraesCS7B02G264800	TF
Root	chr7B:511928203-511928519	0.636	0.392	0.244	1.059	TraesCS7B02G279300	TF
Root	chr7D:370189170-370189427	0	0	0	0	TraesCS7D02G295400	TF
Root	chr7D:370189189-370189689	0.112	0.145	0.185	0.51	TraesCS7D02G295400	TF
Root	chr7D:370181688-370181924	0.757	0.657	0.849	1.419	TraesCS7D02G295400	TF
Root	chr7D:449078021-449078528	0.903	1.263	1.975	0.503	TraesCS7D02G349300	TF
Root	chr7D:462280832-462281403	0.802	0.669	1.133	0.084	TraesCS7D02G359900	TF
Root	chr7D:484724858-484725286	0.522	0.41	0.18	0.745	TraesCS7D02G374400	TF
Root	chr1A:14520032-14521489	0.46	0.61	1.65	0.339	TraesCS1A02G031300	NPF
Root	chr1A:39635922-39636506	0.689	0.973	0.95	0.218	TraesCS1A02G058800	APC
Root	chr1A:39636685-39637459	0.332	0.787	0.816	0.247	TraesCS1A02G058800	APC
Root	chr1A:154700739-154701659	0.899	1.381	1.34	0.572	TraesCS1A02G127500	SLAH
Root	chr1A:154699696-154700386	0.712	0.913	1.429	0.739	TraesCS1A02G127500	SLAH
Root	chr1A:257959542-257960552	0.852	1.002	1.129	0.474	TraesCS1A02G150200	NPF
Root	chr1A:355631111-355631255	0.698	2.511	2.461	3.654	TraesCS1A02G197700	NPF
Root	chr1A:355629620-355630907	0.772	1.886	2.55	3.357	TraesCS1A02G197700	NPF
Root	chr1A:373774759-373774965	1.247	0.652	2.319	0.774	TraesCS1A02G211000	NPF
Root	chr1A:373771125-373771784	0.831	0.815	1.777	0.29	TraesCS1A02G211000	NPF
Root	chr1A:373773727-373774396	0.601	0.571	1.589	0.643	TraesCS1A02G211000	NPF
Root	chr1A:449624597-449625024	0.419	0.411	1.443	0.411	TraesCS1A02G257400	NPF
Root	chr1A:449624036-449624390	0.379	0.554	1.132	0.18	TraesCS1A02G257400	NPF
Root	chr1A:449625420-449625847	0.811	1.137	1.515	0.635	TraesCS1A02G257400	NPF
Root	chr1A:449824432-449825131	0.495	0.724	1.477	0.57	TraesCS1A02G257900	NPF
Root	chr1A:449823449-449824244	0.717	1.001	0.95	0.401	TraesCS1A02G257900	NPF
Root	chr1A:460281342-460281611	0.914	1.152	1.604	0.356	TraesCS1A02G264500	APC
Root	chr1A:460281776-460282260	0.923	0.918	1.305	0.099	TraesCS1A02G264500	APC
Root	chr1A:460280389-460281185	0.954	1.168	1.316	0.461	TraesCS1A02G264500	APC
Root	chr1A:578356564-578357005	1.343	1.101	1.363	0.615	TraesCS1A02G423000	SLAH
Root	chr1A:578934518-578934716	0.733	0.835	1.401	0.322	TraesCS1A02G423900	SLAH
Root	chr1A:578933293-578934260	0.762	0.972	1.02	0.181	TraesCS1A02G423900	SLAH
Root	chrUn:1822711-1824360	0.881	1.403	1.682	0.638	TraesCSU02G001400	SLAH
Root	chrUn:1926113-1928208	0.837	1.026	1.338	0.297	TraesCSU02G001500	SLAH
Root	chrUn:1945642-1945926	1.298	1.673	1.899	0.281	TraesCSU02G001600	SLAH
Root	chrUn:1943734-1944842	1.149	1.725	2.086	0.547	TraesCSU02G001600	SLAH
Root	chr1A:579575098-579576496	0.991	1.626	1.763	0.593	TraesCS1A02G424500	SLAH
Root	chr1B:59635114-59635619	0.066	0.082	1.19	0.41	TraesCS1B02G077200	APC
Root	chr1B:59634103-59634660	0.321	0.482	1.079	0.2	TraesCS1B02G077200	APC
Root	chr1D:39999434-40000604	0.678	0.892	1.396	0.259	TraesCS1D02G059900	APC
Root	chr1D:137967237-137968181	0.876	1.226	1.779	0.253	TraesCS1D02G126500	SLAH
Root	chr1B:297456202-297456409	0.809	1.298	1.935	2.85	TraesCS1B02G168100	NPF
Root	chr1B:385644681-385645519	0.973	0.838	0.864	1.922	TraesCS1B02G212200	NPF
Root	chr1B:403542890-403543603	0.846	1.029	2.139	0.447	TraesCS1B02G224900	NPF
Root	chr1B:403541011-403542220	0.619	0.718	1.44	0.224	TraesCS1B02G224900	NPF
Root	chr1B:403581245-403581848	0.408	0.754	1.635	0.529	TraesCS1B02G225000	NPF
Root	chr1B:403579258-403579433	1.34	1.594	2.025	0.729	TraesCS1B02G225000	NPF
Root	chr1B:482697878-482698251	0.659	0.859	1.776	0.684	TraesCS1B02G275200	APC
Root	chr1B:482696402-482697268	0.774	0.93	1.334	0.423	TraesCS1B02G275200	APC
Root	chr1B:488413198-488413461	0.212	0.825	0.586	0.242	TraesCS1B02G279900	NPF
Root	chr1B:499468262-499468439	0.947	1.459	1.915	0.721	TraesCS1B02G287300	APC
Root	chr1B:670798896-670799159	0.892	1.453	1.113	0.061	TraesCS1B02G456000	SLAH
Root	chr1B:670799531-670799793	0.384	0.71	1.059	0.304	TraesCS1B02G456000	SLAH
Root	chr1B:670830967-670831507	1.014	1.53	1.598	0.531	TraesCS1B02G456100	SLAH
Root	chr1B:670832090-670832634	0.801	1.082	1.218	0.205	TraesCS1B02G456100	SLAH
Root	chr1B:670831702-670832003	1.113	1.201	0.921	0.636	TraesCS1B02G456100	SLAH
Root	chr1B:670900493-670900643	0.596	2.135	2.054	0.425	TraesCS1B02G456200	SLAH
Root	chr1B:670898970-670900329	1.29	1.551	1.667	0.504	TraesCS1B02G456200	SLAH
Root	chr1B:670917058-670917247	1.418	2.405	2.69	0.759	TraesCS1B02G456300	SLAH
Root	chr1B:670916296-670916559	1.402	1.807	1.875	0.303	TraesCS1B02G456300	SLAH
Root	chr1B:670917586-670918010	1.159	2.071	1.708	0.564	TraesCS1B02G456300	SLAH
Root	chr1B:670947812-670947997	1.872	1.899	2.082	0.517	TraesCS1B02G456400	SLAH
Root	chr1B:670946280-670947367	0.781	1.15	1.602	0.264	TraesCS1B02G456400	SLAH
Root	chr1B:670956366-670956736	0.936	1.619	1.749	0.172	TraesCS1B02G456500	SLAH
Root	chr1B:670956897-670957896	0.839	1.231	1.342	0.383	TraesCS1B02G456500	SLAH
Root	chr1B:673748199-673748386	1.553	0.994	1.153	1.108	TraesCS1B02G459700	APC
Root	chr1D:13041391-13042768	0.998	1.208	1.175	0.289	TraesCS1D02G032700	NPF
Root	chr1D:16504822-16506190	0.425	0.71	0.901	0.326	TraesCS1D02G035700	NRT2
Root	chr1D:284040519-284041350	0.833	0.883	1.057	2.091	TraesCS1D02G201100	NPF
Root	chr1A:373766159-373766539	0.852	0.517	2.149	0.21	TraesCS1A02G210900	NPF
Root	chr1A:373767670-373768239	0.609	0.581	2.058	0.224	TraesCS1A02G210900	NPF
Root	chr1A:373766777-373767208	0.518	0.551	1.752	0.185	TraesCS1A02G210900	NPF
Root	chr1D:299581663-299581796	0.336	1.864	0.811	0.36	TraesCS1D02G214300	NPF
Root	chr1D:299582181-299582331	0.894	2.135	2.362	1.063	TraesCS1D02G214300	NPF
Root	chr1D:349255182-349255882	0.543	0.649	1.321	0.456	TraesCS1D02G256700	NPF
Root	chr1D:349254334-349255008	0.398	0.705	1.074	0.284	TraesCS1D02G256700	NPF
Root	chr1D:349541485-349541784	0.971	1.382	1.443	0.213	TraesCS1D02G257200	NPF
Root	chr1D:360468050-360468259	0.588	0.84	1.696	0.687	TraesCS1D02G264700	APC
Root	chr1D:360467541-360467877	0.366	0.277	0.963	0.237	TraesCS1D02G264700	APC
Root	chr1D:365049826-365050007	0.555	0.913	0.596	1.762	TraesCS1D02G269500	NPF
Root	chr1D:374473891-374474153	0.81	0.986	1.823	0.426	TraesCS1D02G277600	APC
Root	chr1D:374471211-374471497	0.234	1.192	1.347	0.446	TraesCS1D02G277600	APC
Root	chr1D:374470606-374470796	0.294	1.359	0.892	0.336	TraesCS1D02G277600	APC
Root	chr3D:496506220-496507201	0.66	0.653	1.508	0.618	TraesCS3D02G379600	CLC
Root	chr1D:482232554-482233009	0.344	0.409	0.813	0.28	TraesCS1D02G432500	SLAH
Root	chr1D:482274985-482275184	0.73	1.142	1.007	0.08	TraesCS1D02G432700	SLAH
Root	chr1D:482274487-482274835	0.514	0.594	0.797	0.092	TraesCS1D02G432700	SLAH
Root	chr1D:482275410-482275770	0.279	0.746	0.899	0.399	TraesCS1D02G432700	SLAH
Root	chr1D:482324511-482324704	0.637	1.178	1.676	0.33	TraesCS1D02G432800	SLAH
Root	chr1D:482323110-482324337	0.546	0.968	1.143	0.39	TraesCS1D02G432800	SLAH
Root	chr1D:482370774-482371060	0.547	1.264	1.455	0.167	TraesCS1D02G432900	SLAH
Root	chr1D:482368761-482370126	0.794	1.408	1.275	0.619	TraesCS1D02G432900	SLAH
Root	chr1D:482491667-482491817	1.34	2.342	3.39	1.169	TraesCS1D02G433100	SLAH
Root	chr1D:482492176-482493148	0.77	1.541	2.108	0.623	TraesCS1D02G433100	SLAH
Root	chr1D:482493358-482493597	0.608	1.426	1.805	0.6	TraesCS1D02G433100	SLAH
Root	chr1D:482516426-482517950	0.748	1.322	1.81	0.45	TraesCS1D02G433200	SLAH
Root	chr2A:3335875-3336170	1.325	1.296	1.306	2.324	TraesCS2A02G007500	NPF
Root	chr2B:28174110-28175165	0.572	0.676	1.285	0.257	TraesCS2B02G057700	NPF
Root	chr2A:430704391-430705002	0.987	1.065	1.412	0.391	TraesCS2A02G268200	APC
Root	chr2A:431046496-431046656	1.117	1.291	1.733	1.395	TraesCS2A02G268400	APC
Root	chr2A:471012791-471013181	0.745	1.139	1.146	0.45	TraesCS2A02G282000	APC
Root	chr2A:471013485-471013889	0.581	0.844	0.915	0.237	TraesCS2A02G282000	APC
Root	chr2A:532091391-532091524	1.932	1.631	2.78	1.438	TraesCS2A02G309100	NPF
Root	chr2D:395136180-395138293	0.862	0.831	0.736	1.871	TraesCS2D02G308100	CLC
Root	chr2A:572840899-572841290	1.314	0.925	2.01	0.408	TraesCS2A02G339100	APC
Root	chr2A:572841449-572842422	0.873	0.722	1.789	0.311	TraesCS2A02G339100	APC
Root	chr2A:569903012-569903239	0.541	0.91	2.172	0.421	TraesCS2A02G335800	NPF
Root	chr2A:569902082-569902719	0.737	0.989	1.379	0.275	TraesCS2A02G335800	NPF
Root	chr2A:564105058-564105395	0	0	0	0	TraesCS2A02G331100	APC
Root	chr2A:564097767-564098713	0.862	0.568	1.596	0.472	TraesCS2A02G331100	APC
Root	chr2A:564104710-564105612	0.619	0.229	0.786	0.389	TraesCS2A02G331100	APC
Root	chr2A:564106795-564106945	0.521	0.62	1.643	0.213	TraesCS2A02G331100	APC
Root	chr2A:564107030-564107315	0.745	0.326	0.378	0.559	TraesCS2A02G331100	APC
Root	chr2A:587405991-587406756	0.555	0.608	1.329	0.313	TraesCS2A02G348600	APC
Root	chr2A:590637733-590638274	1.136	1.127	1.139	1.886	TraesCS2A02G350300	NPF
Root	chr2A:608870759-608872626	0.598	1.433	1.873	1.793	TraesCS2A02G365000	AMT
Root	chr2A:661713091-661713540	0.672	0.92	1.27	0.391	TraesCS2A02G406000	APC
Root	chr2A:661714011-661714389	0.414	0.519	0.815	0.38	TraesCS2A02G406000	APC
Root	chr2A:693429308-693429533	0.993	1.377	1.164	0.638	TraesCS2A02G443600	NPF
Root	chr2A:693428152-693429001	0.605	0.706	0.853	0.3	TraesCS2A02G443600	NPF
Root	chr2A:768517033-768517374	0.753	1.181	1.355	0.094	TraesCS2A02G571900	NPF
Root	chr2A:768517553-768518187	1.515	1.939	1.264	0.805	TraesCS2A02G571900	NPF
Root	chr2A:768469117-768469661	1.786	2.412	1.529	0.469	TraesCS2A02G571800	NPF
Root	chr2A:765055785-765056522	1.576	1.486	0.962	1.882	TraesCS2A02G565600	NPF
Root	chr2B:6336751-6336982	0.919	0.939	0.934	2.623	TraesCS2B02G013000	NPF
Root	chr2B:28098526-28098671	1.849	0.855	0.425	0.66	TraesCS2B02G057600	NPF
Root	chr2B:28097536-28097731	0.115	0.318	0.079	0.245	TraesCS2B02G057600	NPF
Root	chr2B:28097594-28097758	0.068	0	0	0	TraesCS2B02G057600	NPF
Root	chr2B:28097938-28098061	1.453	0.42	0.626	0.778	TraesCS2B02G057600	NPF
Root	chr2B:31606723-31607302	0.83	1.445	1.73	0.165	TraesCS2B02G065200	APC
Root	chr2B:121354958-121355776	0.737	0.354	0.188	1.481	TraesCS2B02G152900	GOGAT
Root	chr2B:121354447-121354822	0.745	1.102	1.52	1.403	TraesCS2B02G152900	GOGAT
Root	chr2D:326738013-326738236	0.701	0.973	0.76	1.93	TraesCS2D02G267400	APC
Root	chr2B:419502596-419503742	0.721	1.235	1.264	0.292	TraesCS2B02G299200	APC
Root	chr2B:468244925-468245289	0.767	0.482	0.339	1.927	TraesCS2B02G326900	CLC
Root	chr2B:468243925-468244701	1.094	0.812	0.893	2.137	TraesCS2B02G326900	CLC
Root	chr2B:468243389-468243639	0.715	1.074	0.986	2.232	TraesCS2B02G326900	CLC
Root	chr2B:468245480-468246170	1.101	0.898	1.116	2.033	TraesCS2B02G326900	CLC
Root	chr2B:488995858-488996132	0.571	0.679	1.406	0.233	TraesCS2B02G342900	APC
Root	chr2B:488994772-488995571	0.643	0.75	1.041	0.279	TraesCS2B02G342900	APC
Root	chr2B:492795384-492795534	1.043	1.24	2.157	0.425	TraesCS2B02G346100	NPF
Root	chr2B:492795924-492796436	0.611	0.726	1.053	0.374	TraesCS2B02G346100	NPF
Root	chr2B:498427478-498427768	0	0	0	0	TraesCS2B02G351100	APC
Root	chr2B:498426885-498427778	0.213	0.127	0.587	0.125	TraesCS2B02G351100	APC
Root	chr2B:498417598-498418743	0.878	0.866	1.642	0.39	TraesCS2B02G351100	APC
Root	chr2B:498426474-498426607	1.68	0.777	0.695	0.36	TraesCS2B02G351100	APC
Root	chr2B:498426750-498427023	0.491	0.151	0.226	0.117	TraesCS2B02G351100	APC
Root	chr2B:525560434-525561428	0.832	1.174	1.457	0.593	TraesCS2B02G368400	NPF
Root	chr2B:659002005-659002156	0.888	1.3	1.939	0.317	TraesCS2B02G464700	NPF
Root	chr2B:659002383-659002890	0.573	0.693	1.55	0.283	TraesCS2B02G464700	NPF
Root	chr2B:659003201-659003480	0.681	1.148	1.712	0.571	TraesCS2B02G464700	NPF
Root	chr2A:713015664-713017171	1.327	1.7	2.443	0.878	TraesCS2A02G470200	APC
Root	chr2A:713015186-713015336	1.713	1.446	2.26	1.488	TraesCS2A02G470200	APC
Root	chr2D:595162167-595162348	1.234	1.655	1.021	2.378	TraesCS2D02G500600	GS
Root	chr2B:798745732-798745927	1.719	1.43	0.474	1.226	TraesCS2B02G626700	NPF
Root	chr2D:15991108-15991306	0.677	0.73	0.934	0.161	TraesCS2D02G044200	NPF
Root	chr2A:17870611-17870761	0.67	0.895	1.438	0.213	TraesCS2A02G045500	NPF
Root	chr2A:17870025-17870303	0.804	0.706	1.496	0.459	TraesCS2A02G045500	NPF
Root	chr2D:30788026-30788976	0.576	0.631	0.941	0.42	TraesCS2D02G073500	NRT2
Root	chr2D:78375806-78377004	0.438	0.319	0.424	1.278	TraesCS2D02G132900	GOGAT
Root	chr2D:309067011-309067663	0.959	1.505	2.339	0.782	TraesCS2D02G256000	APC
Root	chr2D:309068524-309068677	0.657	1.553	1.208	1.355	TraesCS2D02G256000	APC
Root	chr2D:309066089-309066645	1.386	1.524	1.884	1.09	TraesCS2D02G256000	APC
Root	chr2D:349735352-349735894	0.495	0.953	1.819	0.559	TraesCS2D02G278600	APC
Root	chr2D:349734045-349734672	1.336	1.911	2.334	1.17	TraesCS2D02G278600	APC
Root	chr2D:352912993-352913338	1.068	1.527	1.474	0.462	TraesCS2D02G280800	APC
Root	chr2D:352913736-352914328	0.66	0.75	1.171	0.108	TraesCS2D02G280800	APC
Root	chr2D:417086437-417087248	0.978	0.866	1.957	0.374	TraesCS2D02G324000	APC
Root	chr2D:417087407-417087752	1.23	1.258	1.206	0.693	TraesCS2D02G324000	APC
Root	chr2D:420311553-420311958	0.772	0.816	1.522	0.276	TraesCS2D02G327000	NPF
Root	chr2D:420309728-420310169	0.735	0.843	1.188	0.253	TraesCS2D02G327000	NPF
Root	chr2D:420310203-420310430	0.344	0.546	0.475	0.562	TraesCS2D02G327000	NPF
Root	chr2D:424036456-424037343	1.007	0.839	2.015	0.845	TraesCS2D02G331800	APC
Root	chr2D:443483865-443484332	1.555	1.858	1.947	0.478	TraesCS2D02G346500	APC
Root	chr2B:523232951-523233327	1.04	1.071	1.762	0.509	TraesCS2B02G367000	APC
Root	chr2B:523234338-523235211	0.717	0.84	1.235	0.292	TraesCS2B02G367000	APC
Root	chr2D:446598891-446599041	0.223	0.275	0.719	0.425	TraesCS2D02G348600	NPF
Root	chr2D:468856052-468857738	0.61	1.82	2.074	2.383	TraesCS2D02G362900	AMT
Root	chr2D:553255266-553255487	0.657	0.841	1.464	0.361	TraesCS2D02G442700	NPF
Root	chr3A:15074208-15075641	0.819	1.305	1.247	0.567	TraesCS3A02G028100	SLAH
Root	chr3A:32875206-32876617	0.728	1.259	1.43	0.554	TraesCS3A02G057000	NPF
Root	chr3A:38613981-38614407	1.154	1.673	1.447	0.711	TraesCS3A02G065600	APC
Root	chr3A:38614645-38615434	0.694	0.969	1.445	0.445	TraesCS3A02G065600	APC
Root	chr3A:66228318-66228482	0.681	0.693	1.033	1.944	TraesCS3A02G102300	APC
Root	chr3A:66229068-66229398	0.812	0.845	0.7	1.304	TraesCS3A02G102300	APC
Root	chr3A:140805393-140806239	0.621	1.05	1.402	0.302	TraesCS3A02G151400	SLAH
Root	chr3A:140806522-140807429	0.32	0.569	1.121	0.211	TraesCS3A02G151400	SLAH
Root	chr3A:140810087-140810318	0.339	1.163	0.467	0.483	TraesCS3A02G151400	SLAH
Root	chr3A:171551512-171551754	0.646	0.598	1.846	0.198	TraesCS3A02G167000	SLAH
Root	chr3A:171549019-171549753	0.609	1.041	1.469	0.565	TraesCS3A02G167000	SLAH
Root	chr3A:343179617-343179876	0.216	0.598	0.416	0.369	TraesCS3A02G202500	GDH
Root	chr3A:396019004-396019675	1.265	1.509	1.355	3.208	TraesCS3A02G217200	APC
Root	chr3A:421723947-421724128	1.605	1.769	2.128	4.14	TraesCS3A02G225100	SLAH
Root	chr3A:475306735-475306997	0.085	0	0	0	TraesCS3A02G254000	NRT2
Root	chr3A:475306665-475306969	0.073	0.068	0	0.157	TraesCS3A02G254000	NRT2
Root	chr3A:475305707-475306577	0.154	1.211	1.063	1.613	TraesCS3A02G254000	NRT2
Root	chr3A:475304711-475305212	0.602	1.278	1.199	1.75	TraesCS3A02G254000	NRT2
Root	chr3A:541257412-541257809	0.76	0.312	0.194	0.964	TraesCS3A02G305400	AspAT
Root	chr3A:595962340-595962644	0.882	0.646	1.216	0.315	TraesCS3A02G346700	APC
Root	chr3A:595962821-595962973	0.882	0.408	1.723	0.734	TraesCS3A02G346700	APC
Root	chr3A:599386122-599386297	1.021	0.649	1.145	0.364	TraesCS3A02G350800	AMT
Root	chr3A:599385224-599385959	0.714	0.506	1.132	0.239	TraesCS3A02G350800	AMT
Root	chr3A:631727691-631728535	0.516	1.273	1.387	2.116	TraesCS3A02G381600	AMT
Root	chr3A:631728942-631729544	0.52	1.184	0.691	1.483	TraesCS3A02G381600	AMT
Root	chr3A:631776142-631776828	0.651	0.723	1.235	0.256	TraesCS3A02G381700	AMT
Root	chr3A:632373087-632373702	0.817	0.941	1.528	0.674	TraesCS3A02G382600	NPF
Root	chr3A:632383295-632383532	1.037	1.264	1.69	2.085	TraesCS3A02G382700	NPF
Root	chr3D:489642346-489642569	1.252	0.417	0.484	0.214	TraesCS3D02G376300	NPF
Root	chr3A:636860549-636861099	0.63	0.695	1.121	0.609	TraesCS3A02G388000	APC
Root	chr3A:638325810-638326771	0.663	0.537	1.186	0.398	TraesCS3A02G390100	CLC
Root	chr3A:640749101-640749613	0.524	1.291	1.745	0.654	TraesCS3A02G392900	NPF
Root	chr3A:640750441-640751452	1.005	1.104	2.149	0.978	TraesCS3A02G392900	NPF
Root	chr3A:651649082-651649252	0.986	0.912	1.541	0.094	TraesCS3A02G406800	APC
Root	chr3A:651648343-651648658	0.426	0.885	1.125	0.202	TraesCS3A02G406800	APC
Root	chr3A:651961924-651962204	1.157	1.365	1.871	0.342	TraesCS3A02G406900	APC
Root	chr3A:651961425-651961618	0.695	1.178	1.836	0.165	TraesCS3A02G406900	APC
Root	chr3A:651962976-651963585	0.752	0.746	1.24	0.393	TraesCS3A02G406900	APC
Root	chr3B:695551079-695551260	1.049	0.228	0.34	0.176	TraesCS3B02G454100	NPF
Root	chr3A:714419641-714420274	0.671	0.8	0.779	1.31	TraesCS3A02G484900	APC
Root	chr3B:41800697-41801213	0.736	0.941	1.314	0.34	TraesCS3B02G069900	NPF
Root	chr3B:41801468-41801635	0.401	0.928	1.292	0.573	TraesCS3B02G069900	NPF
Root	chr3D:23231873-23232180	1.237	0.976	1.305	2.7	TraesCS3D02G056300	NPF
Root	chr3B:166653254-166653804	0.65	1.24	1.541	0.522	TraesCS3B02G166500	APC
Root	chr3B:183083947-183084789	0.823	0.945	1.372	0.246	TraesCS3B02G178600	SLAH
Root	chr3B:183082458-183083303	0.687	1.002	1.276	0.226	TraesCS3B02G178600	SLAH
Root	chr3B:227664108-227664372	1.1	1.526	1.342	0.121	TraesCS3B02G199200	SLAH
Root	chr3B:227668203-227668572	1.181	1.148	1.336	0.346	TraesCS3B02G199200	SLAH
Root	chr3B:227665267-227665968	0.558	0.943	1.363	0.523	TraesCS3B02G199200	SLAH
Root	chr3B:322290580-322290902	0	0.128	0.048	0.396	TraesCS3B02G227100	GDH
Root	chr3B:322290816-322290970	0.073	0.268	0.3	0.207	TraesCS3B02G227100	GDH
Root	chr3B:322303074-322303264	0.999	0.652	0.649	0.755	TraesCS3B02G227100	GDH
Root	chr3B:537467486-537469099	0.512	0.647	1.184	0.395	TraesCS3B02G332100	NPF
Root	chr3B:596600277-596600736	0.925	0.698	1.88	0.278	TraesCS3B02G378500	APC
Root	chr3B:596600932-596601267	1.767	0.894	1.932	0.619	TraesCS3B02G378500	APC
Root	chr3B:596603594-596604326	1.038	0.96	1.368	0.479	TraesCS3B02G378500	APC
Root	chr3B:603452530-603453969	0.963	0.818	1.296	0.421	TraesCS3B02G383400	AMT
Root	chr3B:651501543-651501799	1.047	1.049	1.745	0.872	TraesCS3B02G414900	NPF
Root	chr3B:651500647-651501109	0.508	0.76	1.267	0.449	TraesCS3B02G414900	NPF
Root	chr3B:651500118-651500328	0.798	0.836	1.394	0.531	TraesCS3B02G414900	NPF
Root	chr3B:657783397-657783750	0.38	0.439	0.044	0.677	TraesCS3B02G420700	APC
Root	chr3B:662797670-662798487	0.957	0.974	2.188	0.566	TraesCS3B02G424800	NPF
Root	chr3B:662796293-662796973	0.674	0.82	1.835	0.586	TraesCS3B02G424800	NPF
Root	chr3B:680480413-680480578	0.677	0.438	1.494	0.097	TraesCS3B02G441100	APC
Root	chr3B:680479385-680479624	0.748	0.864	1.418	0.334	TraesCS3B02G441100	APC
Root	chr3B:680675603-680676007	0.83	1.279	1.678	0.671	TraesCS3B02G441200	APC
Root	chr3D:6022790-6024069	0.751	0.888	1.217	0.449	TraesCS3D02G017800	SLAH
Root	chr3D:23857507-23859293	0.757	1.03	1.57	0.366	TraesCS3D02G057000	NPF
Root	chr3D:37774086-37774599	0.762	1.168	1.952	0.653	TraesCS3D02G077300	ASN
Root	chr3D:37771916-37772610	0.612	0.863	1.554	0.574	TraesCS3D02G077300	ASN
Root	chr3D:84581701-84582738	0.969	0.757	0.594	1.83	TraesCS3D02G126600	CLC
Root	chr3D:129026268-129026572	0.955	1.189	1.368	0.157	TraesCS3D02G159600	SLAH
Root	chr3D:129024682-129025087	0.331	0.536	1.141	0.236	TraesCS3D02G159600	SLAH
Root	chr3D:156726882-156727167	1.607	1.704	2.541	0.559	TraesCS3D02G174800	SLAH
Root	chr3D:156723379-156723769	0.716	1.324	1.383	0.327	TraesCS3D02G174800	SLAH
Root	chr3D:156724686-156725307	0.809	1.214	1.613	0.513	TraesCS3D02G174800	SLAH
Root	chr3D:156728388-156728596	1.235	1.291	1.63	0.383	TraesCS3D02G174800	SLAH
Root	chr3D:268058285-268058429	0.776	0.143	0	0.332	TraesCS3D02G206100	GDH
Root	chr3D:356624064-356624987	0.545	1.321	0.951	1.796	TraesCS3D02G254900	NRT2
Root	chr3D:411003650-411004376	0.723	0.968	1.422	0.483	TraesCS3D02G297600	NPF
Root	chr3D:454152516-454152743	0	0	0	0	TraesCS3D02G340400	APC
Root	chr3D:454151628-454152768	0.47	0.236	0.946	0.168	TraesCS3D02G340400	APC
Root	chr3D:456597799-456598579	1.017	0.715	1.462	0.388	TraesCS3D02G344800	AMT
Root	chr3D:456596848-456597591	0.827	0.584	1.472	0.536	TraesCS3D02G344800	AMT
Root	chr3D:488581727-488581960	1.103	1.153	0.86	1.3	TraesCS3D02G375300	NPF
Root	chr3D:488876034-488876421	1.01	1.201	2.508	0.865	TraesCS3D02G375500	NPF
Root	chr3D:488876766-488876916	2.085	1.859	3.184	1.169	TraesCS3D02G375500	NPF
Root	chr3D:488872870-488873634	1.009	1.244	1.835	0.939	TraesCS3D02G375500	NPF
Root	chr3D:488904412-488905057	0.468	0.432	1.147	0.395	TraesCS3D02G375800	NPF
Root	chr3D:488903091-488903631	0.517	0.555	1.027	0.354	TraesCS3D02G375800	NPF
Root	chr3D:488903740-488904114	0.448	0.58	0.742	0.426	TraesCS3D02G375800	NPF
Root	chr3D:501077719-501078279	0.818	0.978	1.101	0.342	TraesCS3D02G385600	NPF
Root	chr3D:501162798-501162963	1.151	0.877	2.148	0.58	TraesCS3D02G385700	NPF
Root	chr3D:501163496-501164197	1.131	1.149	1.626	0.66	TraesCS3D02G385700	NPF
Root	chr3D:516671427-516671676	1.256	0.83	1.794	0.448	TraesCS3D02G402200	APC
Root	chr3D:516672509-516672843	0.535	0.588	1.199	0.191	TraesCS3D02G402200	APC
Root	chr3D:516671850-516672323	0.638	0.59	0.977	0.506	TraesCS3D02G402200	APC
Root	chr3D:516855285-516856309	0.818	1.19	1.219	0.405	TraesCS3D02G402300	APC
Root	chr3D:526273436-526273769	0.671	0.403	0.694	0.287	TraesCS3D02G414400	NPF
Root	chr3D:578673731-578674532	0.851	1.367	1.154	2.349	TraesCS3D02G479700	APC
Root	chr3D:578675180-578675469	1.005	0.929	0.853	1.545	TraesCS3D02G479700	APC
Root	chr4A:11840796-11841139	1.433	0.994	1.527	0.558	TraesCS4A02G018300	APC
Root	chr4A:11841378-11842327	0.6	0.914	1.266	0.302	TraesCS4A02G018300	APC
Root	chr4A:11986016-11986646	0.94	0.984	1.492	0.152	TraesCS4A02G018400	APC
Root	chr4A:11987605-11988974	0.473	0.777	1.249	0.268	TraesCS4A02G018400	APC
Root	chr4A:12153123-12153935	0.592	0.623	0.911	0.177	TraesCS4A02G018500	APC
Root	chr4A:12152185-12152476	0.461	0.284	0.953	0.329	TraesCS4A02G018500	APC
Root	chr4A:75423042-75423756	1.236	1.244	1.467	3.081	TraesCS4A02G076200	NPF
Root	chr4A:75418405-75419329	1.197	1.006	0.417	2.278	TraesCS4A02G076100	NPF
Root	chr4A:75358139-75358893	0.667	0.726	1.124	0.486	TraesCS4A02G076000	NPF
Root	chr4A:75341463-75341922	0.949	0.675	0.537	1.632	TraesCS4A02G075900	NPF
Root	chr4A:67894797-67894991	0.921	1.171	1.588	0.493	TraesCS4A02G070500	APC
Root	chr4A:67892408-67893062	1.025	1.027	1.508	0.634	TraesCS4A02G070500	APC
Root	chr4A:133455309-133455895	0.667	1.075	0.815	1.741	TraesCS4A02G109900	ASN
Root	chr4A:133453498-133454585	0.524	1.036	0.68	1.1	TraesCS4A02G109900	ASN
Root	chr4A:133457103-133457521	0.481	0.643	0.921	0.801	TraesCS4A02G109900	ASN
Root	chr4A:453310201-453310382	1.358	0.97	0.596	0.881	TraesCS4A02G179500	APC
Root	chr4A:513804355-513805185	0.256	0.485	0.817	0.154	TraesCS4A02G215300	APC
Root	chr4A:513805442-513805998	0.542	0.65	0.804	0.287	TraesCS4A02G215300	APC
Root	chr4A:533259073-533259466	0.597	0.657	1.176	0.284	TraesCS4A02G225400	NPF
Root	chr4A:533261455-533262165	0.645	0.96	1.237	0.382	TraesCS4A02G225400	NPF
Root	chr4A:550467818-550468075	0.522	0.482	1.139	0.124	TraesCS4A02G240700	APC
Root	chr4A:550465125-550465791	0.47	0.62	1.064	0.144	TraesCS4A02G240700	APC
Root	chr4A:575006101-575006904	0.876	0.836	0.921	2.164	TraesCS4A02G262700	NPF
Root	chr4A:593112886-593113026	0.638	0.295	0	0.114	TraesCS4A02G287900	NPF
Root	chr4A:597912087-597912504	0.429	0.297	0.628	0.803	TraesCS4A02G299800	APC
Root	chr4A:651369057-651370139	1.28	1.451	1.566	0.472	TraesCS4A02G376700	NIA
Root	chr4A:709612906-709613810	1.396	2.411	1.943	0.441	TraesCS4A02G440600	NPF
Root	chr4A:709206722-709207123	0.975	1.597	3.151	1.471	TraesCS4A02G440300	NPF
Root	chr4B:9707752-9708138	0.174	0.428	0.359	0.785	TraesCS4B02G013800	APC
Root	chr4B:34725639-34725789	1.862	1.24	1.335	0.213	TraesCS4B02G047400	GS
Root	chr4B:69429682-69430001	0.7	1.133	1.739	0.25	TraesCS4B02G074300	APC
Root	chr4B:69430378-69431091	0.705	0.768	1.037	0.358	TraesCS4B02G074300	APC
Root	chr4B:106491301-106492503	0.511	0.791	1.09	0.332	TraesCS4B02G100800	APC
Root	chr4B:106492828-106493162	0.936	0.742	1.061	0.334	TraesCS4B02G100800	APC
Root	chr4B:124742069-124742960	0.389	0.672	0.986	0.376	TraesCS4B02G111100	APC
Root	chr4B:124741391-124741855	0.77	0.735	1.063	0.481	TraesCS4B02G111100	APC
Root	chr4B:417738873-417739495	0.808	1.445	0.842	1.974	TraesCS4B02G194400	ASN
Root	chr4B:473571761-473572357	0.6	0.659	1.318	0.374	TraesCS4B02G226500	APC
Root	chr4B:483509632-483510115	0.578	0.813	0.223	2.08	TraesCS4B02G231500	NPF
Root	chr4B:483577796-483578962	0.46	0.47	0.502	1.572	TraesCS4B02G231700	NPF
Root	chr4B:483579933-483580083	1.192	0.895	1.027	2.338	TraesCS4B02G231700	NPF
Root	chr4B:483583828-483584441	0.765	0.084	0.126	0.442	TraesCS4B02G231700	NPF
Root	chr4B:483583455-483584028	0.39	0.27	0.618	0.807	TraesCS4B02G231700	NPF
Root	chr4B:483751223-483751595	0.39	0.639	0.083	1.114	TraesCS4B02G232000	NPF
Root	chr4D:394140706-394141591	1.035	0.747	0.818	1.837	TraesCS4D02G233400	NPF
Root	chr4B:568878782-568880249	0.541	0.852	0.924	0.337	TraesCS4B02G285500	APC
Root	chr4B:569406843-569407149	1.387	1.587	1.057	0.521	TraesCS4B02G285800	APC
Root	chr4B:569405519-569406636	0.67	0.869	1.103	0.343	TraesCS4B02G285800	APC
Root	chr4B:631570809-631571639	0.821	1.245	1.708	0.48	TraesCS4B02G338600	NPF
Root	chr4B:631575305-631575636	1.451	1.81	2.281	1.156	TraesCS4B02G338600	NPF
Root	chr4B:659567522-659568076	1.19	1.566	1.557	0.576	TraesCS4B02G375800	NPF
Root	chr4B:659568990-659570011	0.788	0.86	1.162	0.375	TraesCS4B02G375800	NPF
Root	chr4B:672128699-672129113	0.621	0.848	1.079	0.385	TraesCS4B02G398100	NPF
Root	chr4D:15357415-15357620	0.872	1.209	0.601	1.711	TraesCS4D02G033500	CLC
Root	chr4D:74158971-74159157	0.841	0.833	1.574	0.429	TraesCS4D02G097400	APC
Root	chr4D:74159375-74159766	0.514	0.528	0.788	0.245	TraesCS4D02G097400	APC
Root	chr4D:74159951-74160310	0.529	0.432	0.73	0.133	TraesCS4D02G097400	APC
Root	chr4D:338824090-338824799	0.709	1.064	0.717	1.642	TraesCS4D02G195100	ASN
Root	chr4D:394135110-394135501	1.286	1.083	0.276	1.305	TraesCS4D02G233300	NPF
Root	chr4D:403137315-403137465	1.266	1.033	0.822	1.913	TraesCS4D02G240700	GS
Root	chr4D:455699633-455699802	1.785	2.017	2.188	0.472	TraesCS4D02G284500	APC
Root	chr4D:455702693-455702960	1.088	0.967	1.27	0.478	TraesCS4D02G284600	APC
Root	chr4D:508271301-508271935	0.67	0.864	1.118	0.402	TraesCS4D02G361500	NPF
Root	chr5A:18637474-18637774	0.782	0.826	0.822	1.541	TraesCS5A02G022700	APC
Root	chr5A:19976884-19977310	0.996	0.679	0.289	1.572	TraesCS5A02G025400	APC
Root	chr5A:19975753-19976303	0.914	0.714	1.093	2	TraesCS5A02G025400	APC
Root	chr5A:34982478-34982636	1.202	2.485	2.243	0.404	TraesCS5A02G037900	NPF
Root	chr5A:34981253-34982017	0.965	1.596	1.795	0.814	TraesCS5A02G037900	NPF
Root	chr5A:52420669-52420792	1.453	0.168	0.501	1.037	TraesCS5A02G056200	NPF
Root	chr5A:52418973-52419590	0.905	0.753	1.074	1.938	TraesCS5A02G056200	NPF
Root	chr5A:104979859-104980118	0.259	0.758	0.833	0.246	TraesCS5A02G081500	APC
Root	chr5A:104980384-104980881	0.157	0.582	0.527	0.289	TraesCS5A02G081500	APC
Root	chr5A:235243573-235244002	0.963	1.662	1.832	0.52	TraesCS5A02G115800	APC
Root	chr5A:472111298-472111871	0.019	0.198	0.081	0.056	TraesCS5A02G256600	APC
Root	chr5A:472111090-472111740	0.034	0.254	0.095	0.074	TraesCS5A02G256600	APC
Root	chr5A:472110281-472110575	0.342	0.738	0.472	0.434	TraesCS5A02G256600	APC
Root	chr5A:584862951-584863244	1.487	1.657	1.84	0.599	TraesCS5A02G388000	NPF
Root	chr5A:584862632-584862782	1.489	0.758	1.335	0.638	TraesCS5A02G388000	NPF
Root	chr5A:584906813-584907981	0.488	0.584	1.319	0.328	TraesCS5A02G388100	AMT
Root	chr5A:584906247-584906647	0.614	0.749	1.001	0.558	TraesCS5A02G388100	AMT
Root	chr5A:649427208-649428278	0.814	2.365	1.656	4.202	TraesCS5A02G472600	APC
Root	chr5A:672841457-672841696	1.496	1.297	2.514	0.667	TraesCS5A02G508500	NPF
Root	chr5A:672841892-672842042	1.638	1.584	1.849	0.319	TraesCS5A02G508500	NPF
Root	chr5A:672836090-672836443	1.076	1.902	1.353	0.677	TraesCS5A02G508500	NPF
Root	chr5A:672843310-672843511	1.501	1.49	2.223	0.714	TraesCS5A02G508500	NPF
Root	chr5A:672836616-672837105	1.005	0.845	1.575	0.391	TraesCS5A02G508500	NPF
Root	chr5B:861052-861624	0.644	0.74	1.05	0.279	TraesCS5B02G001100	NPF
Root	chr5B:21538869-21539242	1.497	1.163	0.95	2.094	TraesCS5B02G023300	APC
Root	chr5B:21537750-21538560	0.51	0.523	0.59	1.358	TraesCS5B02G023300	APC
Root	chr5B:44140788-44142067	0.568	0.767	1.168	0.349	TraesCS5B02G039100	NPF
Root	chr5B:214261257-214262078	0.844	1.485	1.914	0.602	TraesCS5B02G120800	APC
Root	chr5B:281838187-281838399	0.79	0.39	0.436	1.203	TraesCS5B02G152600	ASN
Root	chr5B:281836708-281837345	0.509	0.665	0.508	0.676	TraesCS5B02G152600	ASN
Root	chr5B:317888155-317888587	0.414	0.789	1.177	0.111	TraesCS5B02G173000	APC
Root	chr5B:317888929-317889436	0.308	0.611	0.76	0.22	TraesCS5B02G173000	APC
Root	chr5B:426558380-426559102	0.805	0.987	1.899	0.42	TraesCS5B02G245300	NPF
Root	chr5B:426565171-426565897	1	1.323	1.804	0.505	TraesCS5B02G245300	NPF
Root	chr5B:438795789-438796819	0.456	0.612	1.197	0.464	TraesCS5B02G256000	APC
Root	chr5B:498078838-498079150	2.184	1.821	2.37	0.613	TraesCS5B02G316000	APC
Root	chr5B:498079222-498079453	0.29	0.76	1	0.897	TraesCS5B02G316000	APC
Root	chr5B:498083440-498083784	1.266	1.471	1.388	0.463	TraesCS5B02G316000	APC
Root	chr5B:571535786-571536962	0.484	0.659	1.258	0.474	TraesCS5B02G393200	AMT
Root	chr5B:588647571-588648384	0.866	1.258	2.066	0.667	TraesCS5B02G414000	NPF
Root	chr5B:610504490-610504685	2.578	0.689	0.474	1.88	TraesCS5B02G437100	GDH
Root	chr5B:610503953-610504203	0.045	0	0	0	TraesCS5B02G437100	GDH
Root	chr5B:610503886-610504176	0.154	0.107	0.159	0.495	TraesCS5B02G437100	GDH
Root	chr5B:631892953-631893520	1.537	3.17	2.418	5.736	TraesCS5B02G457100	CLC
Root	chr5B:631893912-631894401	0.822	1.31	0.945	3.782	TraesCS5B02G457100	CLC
Root	chr5B:631888456-631890023	0.827	2.485	1.917	2.289	TraesCS5B02G457100	CLC
Root	chr5B:665026569-665026728	0.984	1.105	1.55	0.201	TraesCS5B02G498400	NPF
Root	chr5B:665024793-665025088	0.644	0.77	1.149	0.27	TraesCS5B02G498400	NPF
Root	chr5B:665025468-665026133	0.773	0.839	0.973	0.312	TraesCS5B02G498400	NPF
Root	chr5B:665172350-665172968	0.922	1.02	1.222	0.335	TraesCS5B02G498500	NPF
Root	chr5B:665536137-665536698	1.155	1.031	1.071	0.114	TraesCS5B02G498700	NPF
Root	chr5B:665539810-665540449	0.385	0.533	1.013	0.175	TraesCS5B02G498700	NPF
Root	chr5B:665540660-665541152	0.386	0.546	0.939	0.551	TraesCS5B02G498700	NPF
Root	chr5D:29163395-29164168	0.737	0.428	0.578	1.567	TraesCS5D02G031800	APC
Root	chr5D:29162695-29163318	1.165	0.796	0.866	1.791	TraesCS5D02G031800	APC
Root	chr5D:44569831-44570690	0.741	0.746	1.345	0.427	TraesCS5D02G045300	NPF
Root	chr5D:49295140-49295934	0.324	0.69	0.912	0.201	TraesCS5D02G051400	APC
Root	chrUn:115655908-115656430	0.599	1.682	2.361	0.764	TraesCSU02G134900	APC
Root	chr5D:247607615-247607832	1.338	1.143	1.207	0.367	TraesCS5D02G159100	ASN
Root	chr5D:369578482-369579365	0.455	0.48	0.89	0.199	TraesCS5D02G265100	APC
Root	chr5D:464416082-464416278	1.197	1.054	1.336	0.163	TraesCS5D02G398000	NPF
Root	chr5D:464415348-464415810	1.136	0.626	1.067	0.173	TraesCS5D02G398000	NPF
Root	chr5D:480464826-480465526	0.782	0.885	1.365	0.547	TraesCS5D02G419200	NPF
Root	chr5A:617211864-617212156	1.492	0.46	0.106	1.583	TraesCS5A02G434100	GDH
Root	chr5D:494220073-494220308	0	0	0	0	TraesCS5D02G442000	GDH
Root	chr5D:494220067-494220325	0.087	0	0	0	TraesCS5D02G442000	GDH
Root	chr5D:494220646-494220883	1.791	0.523	0.13	1.278	TraesCS5D02G442000	GDH
Root	chr5D:528587440-528588576	0.61	0.773	1.085	0.407	TraesCS5D02G498800	NPF
Root	chr5D:540238386-540238664	1.246	1.821	1.219	2.925	TraesCS5D02G519400	AMT
Root	chr6A:946368-946549	1.049	0.4	0.255	1.233	TraesCS6A02G002400	APC
Root	chr6A:945352-945599	0.181	0.251	0.062	0.258	TraesCS6A02G002400	APC
Root	chr6A:945131-945475	0.292	0.27	0.134	0.417	TraesCS6A02G002400	APC
Root	chr6A:946931-947286	0.755	0.989	0.911	1.257	TraesCS6A02G002400	APC
Root	chr6B:26635614-26635853	1.028	2.507	0.322	3.669	TraesCS6B02G044400	NRT2
Root	chr6B:26635094-26635331	1.367	2.267	1.105	3.162	TraesCS6B02G044400	NRT2
Root	chr6B:26633660-26634025	0.826	1.726	1.14	2.839	TraesCS6B02G044400	NRT2
Root	chr6A:15746852-15747449	0.879	1.332	0.49	2.297	TraesCS6A02G030900	NRT2
Root	chr6A:15755736-15755974	0.704	0.825	0.259	1.34	TraesCS6A02G031000	NRT2
Root	chr6A:15756369-15757087	0	0	0	0	TraesCS6A02G031000	NRT2
Root	chr6A:15756312-15757079	0.044	0.04	0	0.042	TraesCS6A02G031000	NRT2
Root	chr6A:15765025-15765206	0.741	1.941	0.511	1.938	TraesCS6A02G031100	NRT2
Root	chr6A:15783904-15784324	1.011	1.697	0.367	3.416	TraesCS6A02G031200	NRT2
Root	chr6D:15383497-15384165	1.12	1.299	1.453	0.31	TraesCS6D02G037200	NRT2
Root	chr6D:15384471-15384866	0.764	0.785	1.17	0.283	TraesCS6D02G037200	NRT2
Root	chr6A:15952167-15952484	0.987	1.173	1.507	0.151	TraesCS6A02G032400	NRT2
Root	chr6A:15951853-15952010	1.494	1.316	0.883	0.305	TraesCS6A02G032400	NRT2
Root	chr6A:16358788-16359039	0.534	1.317	1.473	0.254	TraesCS6A02G032800	NRT2
Root	chr6A:16359353-16359521	1.13	1.599	1.467	0.474	TraesCS6A02G032800	NRT2
Root	chr6A:16358022-16358453	0.363	0.623	1.072	0.185	TraesCS6A02G032800	NRT2
Root	chr6A:16374458-16374738	0.997	0.553	0.385	0.228	TraesCS6A02G032900	NRT2
Root	chr6A:16377496-16377677	0.617	0.285	0.255	0.528	TraesCS6A02G032900	NRT2
Root	chr6D:15697268-15697734	0.743	0.399	1.422	0.445	TraesCS6D02G037900	NRT2
Root	chr6A:29781115-29781296	0.679	0.342	2.043	4.052	TraesCS6A02G056500	NPF
Root	chr6A:29783440-29784497	0.898	0.792	1.531	3.695	TraesCS6A02G056500	NPF
Root	chr6A:29780614-29780806	1.047	0.377	0.321	0.498	TraesCS6A02G056500	NPF
Root	chr6A:65681833-65683565	0.877	1.336	3.282	1.869	TraesCS6A02G098500	CLC
Root	chr6A:65684827-65684994	1.739	0.495	1.568	1.909	TraesCS6A02G098500	CLC
Root	chr6A:65797676-65798971	0.638	1.715	1.451	2.585	TraesCS6A02G098600	CLC
Root	chr6A:117414554-117415017	0.338	0.402	0.233	1.55	TraesCS6A02G142600	NPF
Root	chr6A:117412586-117412999	0.054	0.15	0.895	1.274	TraesCS6A02G142600	NPF
Root	chr6A:486549490-486549895	0.855	0.893	1.255	0.315	TraesCS6A02G263500	NPF
Root	chr6A:486548815-486549302	0.596	0.891	1.202	0.687	TraesCS6A02G263500	NPF
Root	chr6A:493756822-493757507	0.587	0.935	1.237	0.512	TraesCS6A02G267600	NPF
Root	chr6A:493841771-493841899	2.007	0.565	0.241	1.993	TraesCS6A02G267700	NPF
Root	chr6A:494047892-494048128	0.379	0.481	0.914	0.203	TraesCS6A02G267800	NPF
Root	chr6A:495155159-495155299	0.957	0.221	0.77	0.114	TraesCS6A02G268500	NPF
Root	chr6A:495154900-495155116	1.034	0.383	1.141	0.369	TraesCS6A02G268500	NPF
Root	chr6A:495153084-495153705	0.558	0.449	0.868	0.462	TraesCS6A02G268500	NPF
Root	chr6A:508715077-508715227	0.67	0.895	1.643	0.744	TraesCS6A02G280200	NPF
Root	chr6A:508714083-508714508	0.526	1.142	1.196	0.225	TraesCS6A02G280200	NPF
Root	chr6A:508717385-508717578	0.752	0.91	1.437	0.661	TraesCS6A02G280200	NPF
Root	chr6A:516605860-516606874	0.782	1.212	1.398	0.519	TraesCS6A02G285200	APC
Root	chr6A:520588005-520588614	0.734	1.069	1.366	0.419	TraesCS6A02G288200	APC
Root	chr6A:559522282-559522478	1.311	2.53	0.707	4.88	TraesCS6A02G326200	NIA
Root	chr6A:595059191-595059886	0.884	0.862	1.751	0.596	TraesCS6A02G369900	NPF
Root	chr6A:595060043-595060193	1.192	0.964	1.335	0.638	TraesCS6A02G369900	NPF
Root	chr6B:15130349-15130792	1.387	1.353	0.904	3.743	TraesCS6B02G024900	NIA
Root	chr6B:15933633-15934076	0.857	0.933	0.869	1.655	TraesCS6B02G026900	AspAT
Root	chr6B:26590340-26590647	0.837	1.582	0.502	4.206	TraesCS6B02G044000	NRT2
Root	chr6B:26589469-26589872	0.665	2.076	0.153	3.719	TraesCS6B02G044000	NRT2
Root	chr6B:26598440-26599034	0.639	0.904	0.519	2.872	TraesCS6B02G044100	NRT2
Root	chr6B:26597100-26598173	0.416	1.348	1.508	2.57	TraesCS6B02G044100	NRT2
Root	chr6B:26619321-26619509	1.485	1.758	0.983	3.053	TraesCS6B02G044200	NRT2
Root	chr6B:26628266-26628536	0.703	0.995	0.399	1.83	TraesCS6B02G044300	NRT2
Root	chr6B:27123745-27124300	0.704	0.782	1.305	0.201	TraesCS6B02G045600	NRT2
Root	chr6B:27122811-27123339	0.973	1.057	1.401	0.423	TraesCS6B02G045600	NRT2
Root	chr6B:27172643-27172853	0.106	0.098	2.201	0.304	TraesCS6B02G045700	NRT2
Root	chr6B:27169612-27170307	0.884	0.981	1.663	0.206	TraesCS6B02G045700	NRT2
Root	chr6B:27170587-27171139	0.87	0.954	1.535	0.144	TraesCS6B02G045700	NRT2
Root	chr6B:27686179-27686959	0.917	1.298	1.916	0.47	TraesCS6B02G046500	NRT2
Root	chr6B:27685413-27685975	0.537	0.974	1.179	0.284	TraesCS6B02G046500	NRT2
Root	chr6B:27778139-27779752	1.011	1.031	1.079	0.346	TraesCS6B02G046600	NRT2
Root	chr6B:122291407-122292137	0.551	1.741	2.026	2.381	TraesCS6B02G126800	CLC
Root	chr6A:426965957-426967708	0.504	1.345	1.205	2.058	TraesCS6A02G226800	AMT
Root	chr6B:522641345-522642708	0.803	1.031	1.594	0.468	TraesCS6B02G290500	NPF
Root	chr6B:529772833-529773096	0.849	1.061	0.937	0.788	TraesCS6B02G295000	NPF
Root	chr6B:561705539-561705808	1.536	0.499	0.515	1.185	TraesCS6B02G314000	APC
Root	chr6B:561711606-561712839	0.679	0.788	1.537	0.608	TraesCS6B02G314000	APC
Root	chr6B:656544829-656545100	0.412	0.419	0.625	0	TraesCS6B02G381900	APC
Root	chr6B:656561879-656562089	0.16	0.246	0	0.607	TraesCS6B02G381900	APC
Root	chr6B:668432959-668433638	1.448	1.339	0.953	1.878	TraesCS6B02G393600	AspAT
Root	chr6B:680796038-680796725	0.618	1.128	1.211	0.418	TraesCS6B02G406100	NPF
Root	chr6B:680796890-680797244	0.568	0.788	0.783	0.315	TraesCS6B02G406100	NPF
Root	chr6D:1773146-1773366	0.609	0.61	1.401	0.725	TraesCS6D02G003200	APC
Root	chr6D:14617172-14617599	0.602	1.645	0.253	4.032	TraesCS6D02G035600	NRT2
Root	chr6D:14617974-14618251	0.686	1.454	0.278	3.856	TraesCS6D02G035600	NRT2
Root	chr6D:14615903-14616405	0.556	0.885	0.092	2.922	TraesCS6D02G035600	NRT2
Root	chr6D:14682977-14683172	1.719	0.53	0.158	2.126	TraesCS6D02G035900	NRT2
Root	chr6D:15421042-15421289	1.402	1.338	1.747	0.323	TraesCS6D02G037300	NRT2
Root	chr6D:15418188-15418683	0.858	1.398	1.276	0.29	TraesCS6D02G037300	NRT2
Root	chr6D:15418943-15419541	0.971	1.019	1.288	0.267	TraesCS6D02G037300	NRT2
Root	chr6D:15659281-15660033	1.025	0.92	1.004	0.339	TraesCS6D02G037800	NRT2
Root	chr6D:15710164-15710447	1.539	1.205	1.416	0.113	TraesCS6D02G038000	NRT2
Root	chr6D:15711200-15711521	0.905	0.579	1.104	0.099	TraesCS6D02G038000	NRT2
Root	chr6D:15746435-15746675	0.698	0.947	1.605	0.465	TraesCS6D02G038100	NRT2
Root	chr6D:15746842-15747752	0.626	0.704	1.185	0.21	TraesCS6D02G038100	NRT2
Root	chr6D:22172765-22174145	0.704	1.16	3.26	1.433	TraesCS6D02G047600	NPF
Root	chr6D:28245151-28246530	1.215	1.064	0.86	2.139	TraesCS6D02G060200	NPF
Root	chr6D:138894347-138894472	1.787	1.074	2.095	2.168	TraesCS6D02G160400	APC
Root	chr6D:138893629-138893987	0.998	0.317	0.818	0.98	TraesCS6D02G160400	APC
Root	chr6D:355138065-355138262	1.474	1.94	2.972	0.809	TraesCS6D02G251500	NPF
Root	chr6D:355137215-355137894	0.707	1.035	1.339	0.775	TraesCS6D02G251500	NPF
Root	chr6D:350063400-350064138	0.394	0.588	0.731	0.259	TraesCS6D02G247000	NPF
Root	chr6D:350063007-350063395	0.345	0.586	0.675	0.411	TraesCS6D02G247000	NPF
Root	chr6D:414627287-414627534	1.221	3.011	1.559	5.164	TraesCS6D02G306000	NIA
Root	chr6D:414622609-414624553	1.322	1.429	4.153	2.247	TraesCS6D02G306000	NIA
Root	chr6D:414628303-414629008	1.283	2.301	1.683	3.799	TraesCS6D02G306000	NIA
Root	chr6D:434257901-434258285	1.105	0.538	0.843	0.789	TraesCS6D02G331400	APC
Root	chr6D:453997547-453997697	0.67	1.791	0.616	0.638	TraesCS6D02G363900	APC
Root	chr7A:26102264-26102696	1.034	1.435	1.569	0.406	TraesCS7A02G054000	NPF
Root	chr7A:26102736-26103214	0.935	1.037	1.193	0.5	TraesCS7A02G054000	NPF
Root	chr7A:26239873-26241033	1.29	1.594	1.82	0.316	TraesCS7A02G054100	NPF
Root	chr7A:58205668-58206108	1.625	1.878	1.786	0.435	TraesCS7A02G095200	NPF
Root	chr7A:58212499-58213055	1.105	1.375	1.69	0.287	TraesCS7A02G095200	NPF
Root	chr7A:109264773-109264993	1.066	0.986	1.191	0.217	TraesCS7A02G156600	APC
Root	chr7A:109263543-109264403	0.585	0.577	1.039	0.111	TraesCS7A02G156600	APC
Root	chr7A:144129268-144129811	0.72	1.027	0.596	1.057	TraesCS7A02G188100	APC
Root	chr7A:443964939-443965126	0.956	0.718	0.494	1.535	TraesCS7A02G312800	APC
Root	chr7A:443966793-443967134	0.557	0.394	0.136	0.935	TraesCS7A02G312800	APC
Root	chr7A:522023318-522023526	1.557	1.838	2.148	1.15	TraesCS7A02G356600	APC
Root	chr7A:522111005-522111617	0.475	0.928	1.057	0.365	TraesCS7A02G356639	APC
Root	chr7A:522111961-522112466	0.641	0.941	1.159	0.442	TraesCS7A02G356639	APC
Root	chr7A:556357289-556357473	1.396	0.954	0.335	0.78	TraesCS7A02G381700	NPF
Root	chr7A:603964042-603964700	0.832	1.303	1.639	0.557	TraesCS7A02G413300	NPF
Root	chr7A:621911471-621912221	0	0	0	0	TraesCS7A02G428500	NRT2
Root	chr7A:621911469-621912228	0	0	0	0	TraesCS7A02G428500	NRT2
Root	chr7A:621910697-621911129	0.103	0.12	0.036	0.111	TraesCS7A02G428500	NRT2
Root	chr7A:621910783-621911253	0.095	0.066	0.131	0.204	TraesCS7A02G428500	NRT2
Root	chr7A:661298455-661298757	0.592	1.608	1.326	2.481	TraesCS7A02G464900	APC
Root	chr7A:692626673-692628310	1.058	1.483	1.704	0.73	TraesCS7A02G504300	NPF
Root	chr7A:709813355-709813722	1.096	0.873	1.763	0.391	TraesCS7A02G531000	NPF
Root	chr7A:709815012-709815440	0.731	1.014	1.656	0.372	TraesCS7A02G531000	NPF
Root	chr7B:18097269-18098105	1.042	1.372	2.58	1.125	TraesCS7B02G020500	NPF
Root	chr7B:63169741-63170465	0.741	0.614	0.702	0.242	TraesCS7B02G060400	APC
Root	chr7B:106775536-106776166	0.922	0.738	0.709	1.392	TraesCS7B02G093100	APC
Root	chr7B:116048856-116049512	0.562	0.724	0.916	0.17	TraesCS7B02G101800	NPF
Root	chr7B:138468594-138469744	0.729	0.862	0.924	2.274	TraesCS7B02G119000	APC
Root	chr7B:369412599-369412808	1.229	0.692	0.295	2.441	TraesCS7B02G201900	NPF
Root	chr7B:388956898-388957493	0.957	1.302	1.139	2.921	TraesCS7B02G213000	APC
Root	chr7B:483223811-483223961	0.819	1.033	1.849	0.531	TraesCS7B02G262200	NPF
Root	chr7B:497967370-497967584	0.835	0.724	1.224	0.223	TraesCS7B02G271151	APC
Root	chr7B:503373252-503373923	0.766	0.647	1.171	0.261	TraesCS7B02G274100	AspAT
Root	chr7B:583922746-583923280	0	0	0	0	TraesCS7B02G328700	NRT2
Root	chr7B:583922749-583923305	0	0	0.028	0	TraesCS7B02G328700	NRT2
Root	chr7B:629047646-629049074	0.986	1.555	1.219	3.394	TraesCS7B02G365600	APC
Root	chr7D:25288672-25288990	0.984	1.462	1.308	0.301	TraesCS7D02G049300	NPF
Root	chr7D:25289336-25289615	0.801	1.296	1.381	0.514	TraesCS7D02G049300	NPF
Root	chr7D:25335524-25336610	1.214	1.484	1.405	0.323	TraesCS7D02G049400	NPF
Root	chr7D:43212242-43213277	0	0.03	0.015	0.031	TraesCS7D02G073700	NIA
Root	chr7D:43212295-43213513	0.092	0.254	0.114	0.249	TraesCS7D02G073700	NIA
Root	chr7D:54922463-54923114	0.841	1.285	1.964	0.343	TraesCS7D02G091600	NPF
Root	chr7D:54925901-54926821	0.886	1.538	1.876	0.468	TraesCS7D02G091600	NPF
Root	chr7D:74421545-74422687	0.753	2.207	1.417	2.387	TraesCS7D02G119800	NPF
Root	chr7D:74446615-74447443	0.985	1.26	1.303	0.366	TraesCS7D02G119900	NPF
Root	chr7D:74581265-74582155	0.866	0.905	1.645	0.609	TraesCS7D02G120200	NPF
Root	chr7D:104748906-104749121	0.312	0.432	0.645	0	TraesCS7D02G157000	APC
Root	chr7D:141632452-141633134	0.983	1	0.655	1.192	TraesCS7D02G189100	APC
Root	chr7D:173706905-173707957	0.626	0.707	0.688	1.47	TraesCS7D02G213900	APC
Root	chr7D:392264421-392264777	0.722	0.58	0.26	1.344	TraesCS7D02G309200	APC
Root	chr7D:392263928-392264119	0.877	0.757	0.887	0.918	TraesCS7D02G309200	APC
Root	chr7D:392748467-392748648	1.111	0.799	1.617	3.347	TraesCS7D02G309400	APC
Root	chr7D:478217908-478218494	0.572	0.811	1.131	0.463	TraesCS7D02G369300	AspAT
Root	chr7D:489159000-489160011	1.127	1.492	2.697	1.388	TraesCS7D02G377900	NPF
Root	chr7D:502232662-502232812	0.67	1.033	1.849	0.319	TraesCS7D02G388300	APC
Root	chr7D:502232277-502232489	0.422	1.316	1.235	0.602	TraesCS7D02G388300	APC
Root	chr7D:502231319-502231943	0.823	1.109	1.333	0.485	TraesCS7D02G388300	APC
Root	chr7D:540616759-540617339	0.963	1.888	0.85	2.309	TraesCS7D02G420900	NRT2
Root	chr7D:540617536-540618283	0.508	1.452	1.114	2.134	TraesCS7D02G420900	NRT2
Root	chr7D:572038486-572038839	0.285	0.79	0.218	1.536	TraesCS7D02G452600	APC
Root	chr7D:617082658-617082986	0.851	0.661	0.141	0.729	TraesCS7D02G518900	NPF
Leaf	chr1B:465378693-465378820	0.706	1.932	1.164	0.733	TraesCS1B02G264600	TF
Leaf	chr1B:465379004-465379121	0.383	1.545	2	2.654	TraesCS1B02G264600	TF
Leaf	chr1B:465381898-465382176	1.129	2.833	1.108	0.949	TraesCS1B02G264600	TF
Leaf	chr1D:100651053-100651167	0.131	1.699	1.188	0.953	TraesCS1D02G107600	TF
Leaf	chr1D:100655289-100655562	0.493	1.939	1.444	2.673	TraesCS1D02G107600	TF
Leaf	chr1D:345407220-345407437	0.551	1.845	1.305	1.717	TraesCS1D02G253200	TF
Leaf	chr1D:345409466-345409592	0.83	2.562	3.226	2.957	TraesCS1D02G253200	TF
Leaf	chr2A:382805421-382805605	0	0	0.201	1.013	TraesCS2A02G251800	TF
Leaf	chr2B:373302956-373303191	2.797	1.813	1.782	0.793	TraesCS2B02G271700	TF
Leaf	chr2D:315114720-315115099	2.562	0.477	1.495	0.573	TraesCS2D02G259200	TF
Leaf	chr2D:616528871-616529275	1.257	2.077	1.006	1.806	TraesCS2D02G529000	TF
Leaf	chr3A:333305681-333305892	0.354	0.306	0.525	0.221	TraesCS3A02G200900	TF
Leaf	chr3A:333323794-333324269	1.573	0.489	0.182	0.556	TraesCS3A02G200900	TF
Leaf	chr3A:333328681-333329059	1.779	0.786	0.978	1.027	TraesCS3A02G200900	TF
Leaf	chr3A:679694405-679695051	3.215	0.76	2.307	1.706	TraesCS3A02G436100	TF
Leaf	chr3A:679695585-679695841	3.268	0.908	2.117	1.698	TraesCS3A02G436100	TF
Leaf	chr3B:718849674-718851444	2.516	0.613	1.28	1.272	TraesCS3B02G470700	TF
Leaf	chr3D:543009159-543009442	2.957	1.049	2.133	1.536	TraesCS3D02G428700	TF
Leaf	chr3D:543009537-543009812	2.499	0.329	1.478	0.339	TraesCS3D02G428700	TF
Leaf	chr3B:312160977-312161201	1.734	0.922	0	0.139	TraesCS3B02G225800	TF
Leaf	chr3B:312173815-312173957	0	0	0.694	0.437	TraesCS3B02G225800	TF
Leaf	chr3B:312177595-312178119	1.198	0.616	0.024	0.089	TraesCS3B02G225800	TF
Leaf	chr3D:141207746-141208001	2.109	0.709	1.594	0.548	TraesCS3D02G166900	TF
Leaf	chr3D:250920104-250920318	1.327	0.181	0.115	0.363	TraesCS3D02G203000	TF
Leaf	chr3D:250929005-250929183	1.427	0.29	0	0.349	TraesCS3D02G203000	TF
Leaf	chr3D:250930383-250930575	1.167	0.269	0.321	0.728	TraesCS3D02G203000	TF
Leaf	chr3D:250930645-250930759	0.786	0.68	0.324	0.272	TraesCS3D02G203000	TF
Leaf	chr4D:51615249-51616175	2.146	0.655	1.689	0.822	TraesCS4D02G077600	TF
Leaf	chr5B:89684153-89684353	2.166	0.516	1.108	1.164	TraesCS5B02G075300	TF
Leaf	chr6A:191234243-191234405	0.738	0.877	0.38	0.383	TraesCS6A02G175800	TF
Leaf	chr6B:276513026-276513232	2.321	0.439	0.777	1.281	TraesCS6B02G209600	TF
Leaf	chr6B:276515154-276515345	2.034	0.27	0.709	0.244	TraesCS6B02G209600	TF
Leaf	chr6D:151949216-151949766	1.032	0.54	0.582	0.649	TraesCS6D02G167800	TF
Leaf	chr6D:151952075-151952251	1.443	0.734	0.21	0.617	TraesCS6D02G167800	TF
Leaf	chr6B:638834535-638834681	0.716	2.123	1.097	2.446	TraesCS6B02G366100	TF
Leaf	chr7B:511933628-511933897	1.389	0.24	0.641	0.115	TraesCS7B02G279300	TF
Leaf	chr7D:370189137-370189412	1.902	1.127	1.164	1.242	TraesCS7D02G295400	TF
Leaf	chr7D:484725118-484725351	0.962	0.443	0.476	0.533	TraesCS7D02G374400	TF
Leaf	chr1A:39636073-39636528	0.394	1.135	0.514	0.887	TraesCS1A02G058800	APC
Leaf	chr1A:39636882-39637351	0.446	0.853	0.814	0.96	TraesCS1A02G058800	APC
Leaf	chr1A:60735627-60735753	0.83	2.767	1.271	1.725	TraesCS1A02G077800	APC
Leaf	chr1A:60736829-60736998	0.796	2.674	0.947	1.011	TraesCS1A02G077800	APC
Leaf	chr1A:154698670-154698820	0.498	1.205	1.478	0.518	TraesCS1A02G127500	SLAH
Leaf	chr1A:257959606-257959720	0.524	1.472	0.648	2.588	TraesCS1A02G150200	NPF
Leaf	chr1A:257959795-257960323	0.594	1.076	0.443	0.794	TraesCS1A02G150200	NPF
Leaf	chr1A:373771569-373771788	0.75	1.71	1.968	3.261	TraesCS1A02G211000	NPF
Leaf	chr1A:449814408-449814847	0.306	1	0.645	1.379	TraesCS1A02G257800	NPF
Leaf	chr1A:449823133-449823335	0.592	1.151	0.122	0.461	TraesCS1A02G257900	NPF
Leaf	chr1A:449823397-449823548	0.594	1.197	0.326	0.617	TraesCS1A02G257900	NPF
Leaf	chr1A:449823628-449823903	0.38	1.221	0.806	1.468	TraesCS1A02G257900	NPF
Leaf	chr1A:449824308-449824512	0.366	1.266	1.509	0.989	TraesCS1A02G257900	NPF
Leaf	chr1A:460279328-460279442	0.393	1.472	2.377	1.362	TraesCS1A02G264500	APC
Leaf	chr1A:460280427-460280766	0.705	1.562	1.78	2.015	TraesCS1A02G264500	APC
Leaf	chr1A:577846848-577847106	0.637	0.45	0.239	0.421	TraesCS1A02G422100	ASN
Leaf	chr1A:578355449-578355736	0.26	1.08	0.429	0.757	TraesCS1A02G423000	SLAH
Leaf	chr1A:578355988-578356391	0.222	0.384	0.275	0.809	TraesCS1A02G423000	SLAH
Leaf	chr1A:578356704-578356875	0.262	1.057	0.432	1.816	TraesCS1A02G423000	SLAH
Leaf	chrUn:1822692-1823041	0.514	1.332	0.776	1.424	TraesCSU02G001400	SLAH
Leaf	chrUn:1823437-1823853	0.431	1.179	1.095	1.418	TraesCSU02G001400	SLAH
Leaf	chrUn:1824683-1824872	0.316	1.435	1.303	1.396	TraesCSU02G001400	SLAH
Leaf	chrUn:1926246-1926422	0.679	1.467	1.19	1.147	TraesCSU02G001500	SLAH
Leaf	chrUn:1926786-1926907	0.123	1.921	2.036	2.566	TraesCSU02G001500	SLAH
Leaf	chrUn:1943783-1944143	0.54	1.722	1.608	2.544	TraesCSU02G001600	SLAH
Leaf	chr1A:579575540-579575924	0.35	1.446	0.994	1.536	TraesCS1A02G424500	SLAH
Leaf	chr1A:579576082-579576508	0.421	1.637	1.012	1.385	TraesCS1A02G424500	SLAH
Leaf	chr1A:580433644-580433894	0.12	0.93	0.838	1.49	TraesCS1A02G425300	APC
Leaf	chr1D:40000491-40000675	0.406	0.982	2.276	2.194	TraesCS1D02G059900	APC
Leaf	chr1B:385643373-385644077	0.87	1.431	1.015	2.889	TraesCS1B02G212200	NPF
Leaf	chr1B:499468167-499468348	0.495	1.284	1.905	1.115	TraesCS1B02G287300	APC
Leaf	chr1B:499468957-499469071	0.524	2.152	2.269	2.315	TraesCS1B02G287300	APC
Leaf	chr1B:563034516-563034640	0.361	1.874	1.093	1.753	TraesCS1B02G336300	NIR
Leaf	chr1B:670830891-670831170	0.214	1.157	1.104	1.057	TraesCS1B02G456100	SLAH
Leaf	chr1B:670831224-670831515	0.411	1.376	1.227	1.12	TraesCS1B02G456100	SLAH
Leaf	chr1B:670897904-670898018	0.393	2.039	0.972	1.226	TraesCS1B02G456200	SLAH
Leaf	chr1B:670899000-670899232	0.322	2.115	1.858	3.346	TraesCS1B02G456200	SLAH
Leaf	chr1B:670899755-670900157	0.223	1.51	1.379	2.124	TraesCS1B02G456200	SLAH
Leaf	chr1B:670900593-670900745	0.59	1.784	1.215	1.839	TraesCS1B02G456200	SLAH
Leaf	chr1B:670916216-670916701	0.524	1.358	0.863	1.537	TraesCS1B02G456300	SLAH
Leaf	chr1B:670917058-670917392	0.671	1.16	0.811	1.627	TraesCS1B02G456300	SLAH
Leaf	chr1B:670917576-670917759	0.653	1.835	1.548	1.951	TraesCS1B02G456300	SLAH
Leaf	chr1B:670947045-670947381	0.489	1.076	0.99	1.525	TraesCS1B02G456400	SLAH
Leaf	chr1B:670947672-670948033	0.29	1.323	0.819	0.86	TraesCS1B02G456400	SLAH
Leaf	chr1B:670956435-670956555	0.374	1.829	1.847	2.976	TraesCS1B02G456500	SLAH
Leaf	chr1B:670956921-670957110	0.711	1.025	1.303	2.136	TraesCS1B02G456500	SLAH
Leaf	chr1B:670957325-670957509	0.081	1.684	1.607	1.856	TraesCS1B02G456500	SLAH
Leaf	chr1D:16502042-16502275	0.192	1.164	1.163	1.199	TraesCS1D02G035700	NRT2
Leaf	chr1D:62599297-62599600	0.394	1.534	0.569	0.615	TraesCS1D02G079900	APC
Leaf	chr1D:188460572-188460748	2.207	0.293	0.28	0.353	TraesCS1D02G137900	APC
Leaf	chr1D:416474362-416474538	2.632	0.807	1.54	0.529	TraesCS1D02G324200	NIR
Leaf	chr3D:497727356-497727719	0.37	1.245	0.611	1.24	TraesCS3D02G381500	APC
Leaf	chr1D:482275441-482275555	0.131	1.359	0.54	0.136	TraesCS1D02G432700	SLAH
Leaf	chr1D:482323037-482323326	0.258	1.385	0.98	1.182	TraesCS1D02G432800	SLAH
Leaf	chr1D:482324105-482324281	0.594	1.467	0.91	1.5	TraesCS1D02G432800	SLAH
Leaf	chr1D:482368761-482369438	0.331	1.183	1.001	1.215	TraesCS1D02G432900	SLAH
Leaf	chr1D:482369596-482369985	0.615	0.963	0.982	1.676	TraesCS1D02G432900	SLAH
Leaf	chr1D:482370676-482370921	0.488	1.054	0.905	1.648	TraesCS1D02G432900	SLAH
Leaf	chr1D:482492846-482493032	1.044	1.874	1.92	3.422	TraesCS1D02G433100	SLAH
Leaf	chr1D:482517020-482518049	1.205	1.569	1.436	2.052	TraesCS1D02G433200	SLAH
Leaf	chr2A:3335885-3336132	3.569	1.621	2.094	0.943	TraesCS2A02G007500	NPF
Leaf	chr2B:28174231-28174407	0.509	0.66	0.84	1.323	TraesCS2B02G057700	NPF
Leaf	chr2B:28174573-28174749	0.594	0.66	0.77	1.147	TraesCS2B02G057700	NPF
Leaf	chr2A:133986969-133987430	1.783	0.868	1.015	0.539	TraesCS2A02G175600	NPF
Leaf	chr2A:465556358-465556972	2.19	0.631	1.224	1.29	TraesCS2A02G279700	APC
Leaf	chr2A:570930104-570930292	0.238	0.756	0.786	0.165	TraesCS2A02G337400	APC
Leaf	chr2A:570931431-570931608	0.422	1.386	0.835	1.579	TraesCS2A02G337400	APC
Leaf	chr2A:570932468-570932582	0.131	1.019	0.972	0.545	TraesCS2A02G337400	APC
Leaf	chr2A:569902130-569902458	0.273	1.142	1.202	2.225	TraesCS2A02G335800	NPF
Leaf	chr2A:589788170-589788734	2.464	0.824	1.07	0.716	TraesCS2A02G350100	NPF
Leaf	chr2A:768575044-768575335	0.205	1.242	0.593	1.014	TraesCS2A02G572200	NPF
Leaf	chr2A:768526342-768526492	0.598	1.377	0.493	0.828	TraesCS2A02G571900	NPF
Leaf	chr2B:6333883-6334248	1.187	1.733	0.877	1.404	TraesCS2B02G013000	NPF
Leaf	chr2B:6334506-6334634	0.584	1.412	0.77	1.577	TraesCS2B02G013000	NPF
Leaf	chr2B:28097510-28097652	0.105	0.818	0.954	0.547	TraesCS2B02G057600	NPF
Leaf	chr2B:31606851-31607285	0.448	1.874	1.788	2.754	TraesCS2B02G065200	APC
Leaf	chr2B:31607377-31607553	1.273	1.174	1.33	2.382	TraesCS2B02G065200	APC
Leaf	chr2B:31607856-31608021	1.087	2.582	1.045	1.788	TraesCS2B02G065200	APC
Leaf	chr2B:121354456-121354810	1.773	0.875	1.218	1.886	TraesCS2B02G152900	GOGAT
Leaf	chr2B:121354977-121355565	1.575	0.329	1.047	0.37	TraesCS2B02G152900	GOGAT
Leaf	chr2B:121355866-121356089	1.34	0.405	1.381	0.139	TraesCS2B02G152900	GOGAT
Leaf	chr2B:121370369-121370859	0.579	0.184	0.452	0.222	TraesCS2B02G152900	GOGAT
Leaf	chr2B:396341027-396341169	1.578	0.455	1.214	0.328	TraesCS2B02G287200	APC
Leaf	chr2B:396341856-396342246	1.686	0.497	0.79	0.518	TraesCS2B02G287200	APC
Leaf	chr2D:326738928-326739160	1.739	0.501	1.646	1.138	TraesCS2D02G267400	APC
Leaf	chr2B:419502485-419502917	0.38	1.435	0.969	2.228	TraesCS2B02G299200	APC
Leaf	chr2B:419502987-419503130	0.522	1.264	0.775	0.977	TraesCS2B02G299200	APC
Leaf	chr2B:465831491-465831608	0.383	1.435	0.316	1.327	TraesCS2B02G326200	NPF
Leaf	chr2B:491057549-491058090	1.436	0.668	0.592	0.603	TraesCS2B02G344500	APC
Leaf	chr2B:492793131-492793539	0.366	1.298	0.755	0.533	TraesCS2B02G346100	NPF
Leaf	chr2B:525823047-525824162	1.983	0.614	0.884	0.641	TraesCS2B02G368600	NPF
Leaf	chr2A:713015741-713016359	0.556	1.442	1.594	2.939	TraesCS2A02G470200	APC
Leaf	chr2A:713016464-713016740	0.812	0.795	1.294	1.519	TraesCS2A02G470200	APC
Leaf	chr2A:713016882-713017069	0.639	1.726	2.239	3.57	TraesCS2A02G470200	APC
Leaf	chr2B:722328714-722329032	2.537	0.771	1.123	0.928	TraesCS2B02G527800	APC
Leaf	chr2D:5086848-5087268	1.316	1.691	1.144	1.294	TraesCS2D02G009100	NPF
Leaf	chr2D:5087342-5087523	0.825	2.14	0.476	1.201	TraesCS2D02G009100	NPF
Leaf	chr2D:5089396-5089604	3.663	2.297	1.954	0.597	TraesCS2D02G009100	NPF
Leaf	chr2D:15991920-15992063	0.209	1.174	0.431	0.543	TraesCS2D02G044200	NPF
Leaf	chr2D:78375112-78375311	1.276	0.584	0.805	0.546	TraesCS2D02G132900	GOGAT
Leaf	chr2D:78375806-78376007	1.264	0.707	1.409	1.468	TraesCS2D02G132900	GOGAT
Leaf	chr2D:78376215-78376540	1.011	0.199	0.682	0.287	TraesCS2D02G132900	GOGAT
Leaf	chr2D:78376611-78377003	1.105	0.428	0.785	0.475	TraesCS2D02G132900	GOGAT
Leaf	chr2D:78377088-78377264	1.104	0	0.49	0.265	TraesCS2D02G132900	GOGAT
Leaf	chr2D:309066262-309066438	1.953	1.908	2.309	2.823	TraesCS2D02G256000	APC
Leaf	chr2D:309067077-309067647	0.55	1.631	1.405	2.342	TraesCS2D02G256000	APC
Leaf	chr2D:309068499-309068745	0.547	1.522	0.851	2.335	TraesCS2D02G256000	APC
Leaf	chr2D:315492789-315493067	0.484	0.836	0.576	1.564	TraesCS2D02G259400	NPF
Leaf	chr2D:349735527-349735951	0.423	1.553	1.249	2.746	TraesCS2D02G278600	APC
Leaf	chr2D:349736906-349737038	0.113	1.761	1.493	2.823	TraesCS2D02G278600	APC
Leaf	chr2D:420310150-420310476	0.917	0.871	1.133	1.524	TraesCS2D02G327000	NPF
Leaf	chr2B:523234376-523235156	0.441	1.391	0.884	1.393	TraesCS2B02G367000	APC
Leaf	chr2D:446314862-446315629	2.201	0.522	1.108	0.789	TraesCS2D02G348500	NPF
Leaf	chr2D:446315966-446316130	0.547	0.945	0.451	0.663	TraesCS2D02G348500	NPF
Leaf	chr2D:608923938-608924234	0.252	0.523	0.333	0.997	TraesCS2D02G519000	CLC
Leaf	chr2D:643761636-643762214	0.129	0.469	0.447	1.101	TraesCS2D02G583600	NPF
Leaf	chr2D:643768435-643768611	0.17	1.321	0.91	0.706	TraesCS2D02G583600	NPF
Leaf	chr2D:643768826-643769171	0.52	0.861	1.035	0.855	TraesCS2D02G583600	NPF
Leaf	chr2D:643769288-643769570	0.265	1.465	1.005	1.321	TraesCS2D02G583600	NPF
Leaf	chr2D:643737385-643737769	0.428	1.143	0.77	1.294	TraesCS2D02G583500	NPF
Leaf	chr2D:643744180-643744468	0.363	0.359	0.171	0.863	TraesCS2D02G583500	NPF
Leaf	chr2D:643744728-643745356	0.167	0.35	0.333	0.89	TraesCS2D02G583500	NPF
Leaf	chr3A:15074119-15074510	0.306	1.057	0.725	1.032	TraesCS3A02G028100	SLAH
Leaf	chr3A:15074644-15074758	0.131	1.359	0.54	1.089	TraesCS3A02G028100	SLAH
Leaf	chr3A:15074933-15075111	0.672	0.653	1.038	0.959	TraesCS3A02G028100	SLAH
Leaf	chr3A:47847083-47847259	0.764	0.293	7.558	6.528	TraesCS3A02G077100	ASN
Leaf	chr3A:47847640-47848055	0.396	1.462	0.979	0.823	TraesCS3A02G077100	ASN
Leaf	chr3A:171549425-171549601	0.764	1.321	1.889	3.44	TraesCS3A02G167000	SLAH
Leaf	chr3A:171550936-171551050	0.655	1.586	1.08	2.451	TraesCS3A02G167000	SLAH
Leaf	chr3A:171551118-171551284	0.63	1.478	1.41	1.403	TraesCS3A02G167000	SLAH
Leaf	chr3A:343179392-343179688	0.707	0.174	0.291	0.262	TraesCS3A02G202500	GDH
Leaf	chr3A:490931605-490932111	0.738	0.332	0.122	0.123	TraesCS3A02G266300	GOGAT
Leaf	chr3A:541260718-541260904	0.884	0.278	0.132	0.25	TraesCS3A02G305400	AspAT
Leaf	chr3A:621011550-621011810	0.172	1.142	0.805	1.373	TraesCS3A02G370300	APC
Leaf	chr3A:632423952-632424220	1.059	0.145	0.781	0	TraesCS3A02G382900	NPF
Leaf	chr3A:632424248-632424408	0.654	0.242	0.77	1.358	TraesCS3A02G382900	NPF
Leaf	chr3A:638325947-638326065	0.253	0.657	0.522	1.579	TraesCS3A02G390100	CLC
Leaf	chr3A:640701924-640702173	1.86	0.778	1.781	2.432	TraesCS3A02G392800	NPF
Leaf	chr3A:651650150-651650289	0.322	1.301	0.886	1.675	TraesCS3A02G406800	APC
Leaf	chr3A:651961286-651961566	0.32	1.153	1.32	1.941	TraesCS3A02G406900	APC
Leaf	chr3A:651961861-651962170	0.484	1.254	2.033	1.96	TraesCS3A02G406900	APC
Leaf	chr3A:714364572-714364748	0.934	1.174	0.77	1.235	TraesCS3A02G484862	APC
Leaf	chr3A:714365006-714365527	0.401	1.388	0.946	1.192	TraesCS3A02G484862	APC
Leaf	chr3B:772723732-772724459	0.39	1.243	1	1.345	TraesCS3B02G532100	APC
Leaf	chr3D:578773063-578773312	0.6	1.089	1.434	3.429	TraesCS3D02G479800	APC
Leaf	chr3D:578773643-578773757	0.262	1.926	1.08	2.724	TraesCS3D02G479800	APC
Leaf	chr3D:578775433-578775884	0.265	1.231	0.901	1.48	TraesCS3D02G479800	APC
Leaf	chr3D:578775973-578776457	0.062	1.201	1.221	1.476	TraesCS3D02G479800	APC
Leaf	chr3A:714415339-714415506	0.089	0.928	1.033	1.023	TraesCS3A02G484900	APC
Leaf	chr3A:714415713-714415932	0.273	0.884	0.337	0.284	TraesCS3A02G484900	APC
Leaf	chr3A:714421375-714421498	0.121	1.26	1.202	1.136	TraesCS3A02G484900	APC
Leaf	chr3D:23231797-23231990	5.961	2.007	3.829	1.77	TraesCS3D02G056300	NPF
Leaf	chr3B:183074993-183075159	0.36	1.089	0.668	1.216	TraesCS3B02G178600	SLAH
Leaf	chr3B:183075216-183075372	0	0.828	0.711	0.896	TraesCS3B02G178600	SLAH
Leaf	chr3B:183075589-183075716	0.235	1.423	0.582	1.1	TraesCS3B02G178600	SLAH
Leaf	chr3B:183084639-183084815	0.594	1.687	1.54	1.676	TraesCS3B02G178600	SLAH
Leaf	chr3B:256247806-256248035	1.24	0.395	0.699	1.492	TraesCS3B02G215200	NPF
Leaf	chr3B:227665297-227665411	0.655	2.039	1.405	1.907	TraesCS3B02G199200	SLAH
Leaf	chr3B:227665522-227665894	0.643	1.18	0.96	1.628	TraesCS3B02G199200	SLAH
Leaf	chr3B:227665984-227666098	0.393	1.472	1.729	0.545	TraesCS3B02G199200	SLAH
Leaf	chr3B:227668239-227668569	0.226	1.369	0.56	1.317	TraesCS3B02G199200	SLAH
Leaf	chr3B:322289367-322289543	1.528	0.147	0.49	0.529	TraesCS3B02G227100	GDH
Leaf	chrUn:39535138-39535324	0.161	1.25	1.987	2.003	TraesCSU02G049700	APC
Leaf	chr3B:410778767-410778975	0.862	2.421	0.711	0.597	TraesCS3B02G254700	SLAH
Leaf	chr3B:410779054-410779334	1.814	2.26	1.012	1.719	TraesCS3B02G254700	SLAH
Leaf	chr3B:481595204-481595722	1.615	0.499	0.642	1.019	TraesCS3B02G299800	GOGAT
Leaf	chr3B:481595861-481596113	1.364	0.307	0.587	0.37	TraesCS3B02G299800	GOGAT
Leaf	chr3B:481596916-481597108	1.712	0.067	0.641	0.485	TraesCS3B02G299800	GOGAT
Leaf	chr3B:537467675-537467821	0.409	1.238	1.687	1.914	TraesCS3B02G332100	NPF
Leaf	chr3B:537467942-537468056	0.524	1.359	1.513	1.634	TraesCS3B02G332100	NPF
Leaf	chr3B:636766312-636766493	0	1.355	0.204	0.772	TraesCS3B02G402200	APC
Leaf	chr3B:651426614-651427079	2.121	0.611	0.901	0.835	TraesCS3B02G414800	NPF
Leaf	chr3B:662796120-662796234	0.524	2.379	1.296	2.724	TraesCS3B02G424800	NPF
Leaf	chr3B:662796610-662797013	0.741	1.698	1.711	2.889	TraesCS3B02G424800	NPF
Leaf	chr3B:662797642-662797890	0.602	1.718	1.54	3.067	TraesCS3B02G424800	NPF
Leaf	chr3B:662798036-662798212	1.019	1.027	1.889	3.97	TraesCS3B02G424800	NPF
Leaf	chr3B:662798317-662798465	0.606	1.658	2.08	2.937	TraesCS3B02G424800	NPF
Leaf	chr3B:680479907-680480367	0.39	1.011	0.937	0.945	TraesCS3B02G441100	APC
Leaf	chr3B:680676782-680676896	0.786	2.265	1.729	1.77	TraesCS3B02G441200	APC
Leaf	chr3B:680676990-680677182	1.012	2.287	2.309	1.698	TraesCS3B02G441200	APC
Leaf	chr3D:6023341-6023490	0.1	1.647	0.827	1.146	TraesCS3D02G017800	SLAH
Leaf	chr3D:37774190-37774575	0.194	1.342	2.207	2.541	TraesCS3D02G077300	ASN
Leaf	chr3D:37778237-37778406	0.265	1.07	1.312	0.919	TraesCS3D02G077300	ASN
Leaf	chr3D:84577493-84577813	0.28	0.484	0.154	1.019	TraesCS3D02G126600	CLC
Leaf	chr3D:129026470-129026645	0.683	1.845	1.267	1.065	TraesCS3D02G159600	SLAH
Leaf	chr3D:156723199-156723584	0.233	1.442	1.344	1.331	TraesCS3D02G174800	SLAH
Leaf	chr3D:156724719-156724895	0.679	1.027	2.169	3.617	TraesCS3D02G174800	SLAH
Leaf	chr3D:156726884-156727131	0.302	1.934	1.396	3.331	TraesCS3D02G174800	SLAH
Leaf	chr3D:156728362-156728594	0.515	1.837	1.221	2.075	TraesCS3D02G174800	SLAH
Leaf	chr3D:369800835-369801391	0.914	0.232	0.177	0.195	TraesCS3D02G266400	GOGAT
Leaf	chr3D:411005230-411005360	0.115	1.291	0.853	0.955	TraesCS3D02G297600	NPF
Leaf	chr3D:488581711-488582068	1.088	0.868	1.346	0.391	TraesCS3D02G375300	NPF
Leaf	chr3D:501163496-501164375	2.618	2.394	1.471	2.72	TraesCS3D02G385700	NPF
Leaf	chr3D:516855330-516855741	0.364	1.382	1.678	1.511	TraesCS3D02G402300	APC
Leaf	chr3D:516856159-516856273	0.786	2.152	1.945	3.268	TraesCS3D02G402300	APC
Leaf	chr3D:578677365-578677487	0.49	1.905	1.918	2.036	TraesCS3D02G479700	APC
Leaf	chr3D:578677648-578677836	0.318	1.648	1.834	2.312	TraesCS3D02G479700	APC
Leaf	chr4A:11986266-11986478	0.141	1.462	1.627	2.051	TraesCS4A02G018400	APC
Leaf	chr4A:11986545-11986659	0	1.019	1.188	0.817	TraesCS4A02G018400	APC
Leaf	chr4A:46219516-46220363	1.817	0.701	1.251	1.228	TraesCS4A02G055300	APC
Leaf	chr4A:75419157-75419338	2.807	1.213	1.701	0.944	TraesCS4A02G076100	NPF
Leaf	chr4A:75341481-75342251	1.417	0.553	1.136	0.585	TraesCS4A02G075900	NPF
Leaf	chr4A:75347337-75347555	1.165	0.296	0.339	0.712	TraesCS4A02G075900	NPF
Leaf	chr4A:67892883-67892997	0.262	1.699	2.269	3.132	TraesCS4A02G070500	APC
Leaf	chr4A:575006132-575006785	2.402	1.226	2.32	1.141	TraesCS4A02G262700	NPF
Leaf	chr4A:575009731-575009909	2.098	0.943	1.453	1.483	TraesCS4A02G262700	NPF
Leaf	chr4A:597912187-597912568	1.647	0.508	1.067	0.937	TraesCS4A02G299800	APC
Leaf	chr4A:651363340-651363862	0.315	1.064	0.495	1.249	TraesCS4A02G376700	NIA
Leaf	chr4A:651364490-651364604	0.393	1.812	1.837	2.86	TraesCS4A02G376700	NIA
Leaf	chr4A:651369509-651370012	0.386	1.566	1.151	1.79	TraesCS4A02G376700	NIA
Leaf	chr4A:709716441-709717117	0.42	1.184	0.146	0.276	TraesCS4A02G440700	NPF
Leaf	chr4A:709717227-709717646	0.214	1.109	0.559	0.556	TraesCS4A02G440700	NPF
Leaf	chr4A:709615961-709616163	0.74	2.237	1.341	2.69	TraesCS4A02G440600	NPF
Leaf	chr4A:709613482-709613834	0.552	2.274	0.98	1.676	TraesCS4A02G440600	NPF
Leaf	chr4A:709613132-709613378	0.304	1.68	1.101	1.199	TraesCS4A02G440600	NPF
Leaf	chr4A:709206370-709206606	0.443	1.368	2.296	3.75	TraesCS4A02G440300	NPF
Leaf	chr4B:9707830-9708024	0.924	0.133	0.762	0.56	TraesCS4B02G013800	APC
Leaf	chr4B:25853118-25853332	0.768	0.664	0.576	1.161	TraesCS4B02G035500	CLC
Leaf	chr4B:69427511-69427722	0.212	1.285	0.817	0.809	TraesCS4B02G074300	APC
Leaf	chr4B:93412326-93412571	0.549	0.58	0.955	0.444	TraesCS4B02G090800	NPF
Leaf	chr4B:417741314-417741541	0.592	1.308	1.411	2.257	TraesCS4B02G194400	ASN
Leaf	chr4B:473570380-473570504	0.482	1.666	1.788	1.502	TraesCS4B02G226500	APC
Leaf	chr4B:473571014-473571202	0.159	1.099	1.376	1.074	TraesCS4B02G226500	APC
Leaf	chr4B:473571296-473571410	0.131	1.133	1.188	1.089	TraesCS4B02G226500	APC
Leaf	chr4B:473572017-473572173	0.575	1.324	1.105	2.488	TraesCS4B02G226500	APC
Leaf	chr4B:483508879-483509045	0.45	0.933	1.632	2.806	TraesCS4B02G231500	NPF
Leaf	chr4B:483577840-483578926	1.445	0.535	0.692	0.329	TraesCS4B02G231700	NPF
Leaf	chr4B:483579898-483580080	2.463	0.639	0.88	0.853	TraesCS4B02G231700	NPF
Leaf	chr4B:483583693-483584387	1.701	0.688	0.568	0.38	TraesCS4B02G231700	NPF
Leaf	chr4B:483751370-483751546	1.443	0.22	0.49	0.176	TraesCS4B02G232000	NPF
Leaf	chr4B:483751877-483752060	1.306	0.776	0.538	0	TraesCS4B02G232000	NPF
Leaf	chr4D:394140680-394141556	1.91	0.663	0.914	0.603	TraesCS4D02G233400	NPF
Leaf	chr4B:631575406-631575936	1.297	2.095	1.162	1.377	TraesCS4B02G338600	NPF
Leaf	chr4B:631578442-631578640	1.358	2.543	2.239	1.568	TraesCS4B02G338600	NPF
Leaf	chr4B:642924295-642924409	0.917	1.699	1.296	1.498	TraesCS4B02G350000	APC
Leaf	chr4B:642924748-642924960	0.916	1.584	0.93	1.025	TraesCS4B02G350000	APC
Leaf	chr4B:659567627-659568145	0.49	1.246	0.951	2.068	TraesCS4B02G375800	NPF
Leaf	chr4B:659575751-659575939	0.159	1.374	0.786	0.991	TraesCS4B02G375800	NPF
Leaf	chr4B:672129729-672129942	1.263	1.758	0.52	1.02	TraesCS4B02G398100	NPF
Leaf	chr4D:5586480-5586941	1.426	0.364	0.641	0.471	TraesCS4D02G011700	APC
Leaf	chr4D:10767009-10767180	1.66	0.906	1.945	0.545	TraesCS4D02G024400	NPF
Leaf	chr4D:15357487-15357675	1.431	1.236	1.376	1.321	TraesCS4D02G033500	CLC
Leaf	chr4D:338822832-338823046	0.419	0.422	0.46	1.161	TraesCS4D02G195100	ASN
Leaf	chr4D:386439535-386439843	0.194	0.922	0.36	0.706	TraesCS4D02G227200	APC
Leaf	chr4D:393720361-393720721	1.079	0.43	0.479	0.345	TraesCS4D02G232900	NPF
Leaf	chr4D:455703201-455703420	0.273	1.356	1.125	0.425	TraesCS4D02G284600	APC
Leaf	chr4D:455703473-455703587	0.262	1.246	1.513	1.089	TraesCS4D02G284600	APC
Leaf	chr4D:493334568-493334886	0.94	2.314	0.155	1.074	TraesCS4D02G335100	NPF
Leaf	chr4D:499730504-499730618	0.393	1.472	0.972	1.226	TraesCS4D02G344800	APC
Leaf	chr4D:508269274-508269468	0.077	1.265	0.508	0.32	TraesCS4D02G361500	NPF
Leaf	chr4D:508271716-508271837	0.617	1.174	0.611	1.026	TraesCS4D02G361500	NPF
Leaf	chr4D:508271893-508272112	0.205	0.884	0.619	0.78	TraesCS4D02G361500	NPF
Leaf	chr5A:19975796-19976126	2.173	0.939	1.493	0.612	TraesCS5A02G025400	APC
Leaf	chr5A:19976549-19977187	1.686	0.405	0.753	0.219	TraesCS5A02G025400	APC
Leaf	chr5A:34981138-34981328	0.944	1.835	1.75	2.37	TraesCS5A02G037900	NPF
Leaf	chr5A:34981643-34982022	1.064	2.044	2.535	2.99	TraesCS5A02G037900	NPF
Leaf	chr5A:34982579-34982732	0.391	2.025	2.254	2.334	TraesCS5A02G037900	NPF
Leaf	chr5A:235243824-235244050	0.595	2.228	1.199	2.473	TraesCS5A02G115800	APC
Leaf	chr5A:235245208-235245606	0.45	1.979	2.166	2.926	TraesCS5A02G115800	APC
Leaf	chr5A:331396181-331396561	0.826	1.291	0.324	1.021	TraesCS5A02G153900	ASN
Leaf	chr5A:372930135-372930429	0.813	0.395	0.126	0.422	TraesCS5A02G176900	APC
Leaf	chr5A:573599594-573599931	0.355	1.111	0.658	0.829	TraesCS5A02G375600	APC
Leaf	chr5A:649401675-649402235	3.202	0.807	2.221	1.941	TraesCS5A02G472500	APC
Leaf	chr5A:649425522-649425715	0.697	1.806	1.085	0.563	TraesCS5A02G472600	APC
Leaf	chrUn:100088034-100088233	0.601	1.363	0.495	1.014	TraesCSU02G115500	NPF
Leaf	chr5A:672835641-672835755	1.049	2.945	2.053	2.043	TraesCS5A02G508500	NPF
Leaf	chr5A:672840137-672840370	0.962	2.937	0.581	2.399	TraesCS5A02G508500	NPF
Leaf	chr5A:672841624-672842172	1.2	2.097	0.921	1.898	TraesCS5A02G508500	NPF
Leaf	chr5A:672836506-672836714	0.934	1.924	2.369	2.762	TraesCS5A02G508500	NPF
Leaf	chr5A:672836162-672836319	1.332	2.632	2.432	3.263	TraesCS5A02G508500	NPF
Leaf	chr5B:19441112-19441805	3.126	0.932	2.151	1.68	TraesCS5B02G019600	APC
Leaf	chr5B:21538252-21538473	1.555	0.409	1.449	0.422	TraesCS5B02G023300	APC
Leaf	chr5B:21538914-21539247	1.974	0.582	1.221	1.119	TraesCS5B02G023300	APC
Leaf	chr5B:197192424-197193381	1.936	0.998	0.978	2.141	TraesCS5B02G116100	APC
Leaf	chr5B:214261529-214261812	0.581	1.506	1.828	2.798	TraesCS5B02G120800	APC
Leaf	chr5B:214262936-214263234	0.351	2.037	2.149	3.438	TraesCS5B02G120800	APC
Leaf	chr5B:281838058-281838275	1.377	0.179	0.341	0.715	TraesCS5B02G152600	ASN
Leaf	chr5B:426558827-426559118	0.822	1.287	1.439	1.974	TraesCS5B02G245300	NPF
Leaf	chr5B:426563279-426563401	0.245	2.011	1.312	0.509	TraesCS5B02G245300	NPF
Leaf	chr5B:426563582-426563696	0.131	1.586	0.648	2.043	TraesCS5B02G245300	NPF
Leaf	chr5B:426565314-426565561	0.242	1.202	1.646	2.263	TraesCS5B02G245300	NPF
Leaf	chr5B:426567215-426567329	0	2.039	0.54	1.089	TraesCS5B02G245300	NPF
Leaf	chr5B:498078863-498079119	0.584	2.825	2.406	3.275	TraesCS5B02G316000	APC
Leaf	chr5B:498083675-498083791	0.773	1.892	1.699	2.811	TraesCS5B02G316000	APC
Leaf	chr5B:547398706-547399666	2.35	0.726	1.052	1.294	TraesCS5B02G368800	APC
Leaf	chr5B:547406326-547406614	0.726	0.448	0.128	0.162	TraesCS5B02G368800	APC
Leaf	chr5B:571523173-571524007	0.376	1.347	0.384	0.503	TraesCS5B02G393100	NPF
Leaf	chr5B:631894031-631894416	3.648	0.939	1.632	0.605	TraesCS5B02G457100	CLC
Leaf	chr5B:665024967-665025127	0.374	0.726	0.385	1.261	TraesCS5B02G498400	NPF
Leaf	chr5D:26792971-26793798	2.656	0.812	1.623	1.408	TraesCS5D02G028100	APC
Leaf	chr5D:29162734-29163037	2.022	1.193	1.301	0.922	TraesCS5D02G031800	APC
Leaf	chr5D:29163198-29164111	1.276	0.325	0.89	0.442	TraesCS5D02G031800	APC
Leaf	chr5D:62299445-62299724	1.017	0.787	1.81	0.612	TraesCS5D02G067100	NPF
Leaf	chr5D:114385337-114385573	1.203	0.766	0.835	1.513	TraesCS5D02G101500	APC
Leaf	chr5D:114389555-114389697	0.631	1.182	0.347	0.765	TraesCS5D02G101500	APC
Leaf	chrUn:115654303-115654433	0.23	0.894	1.611	3.822	TraesCSU02G134900	APC
Leaf	chrUn:115654576-115654848	0.439	1.851	1.857	2.569	TraesCSU02G134900	APC
Leaf	chrUn:115655965-115656228	0.17	1.08	1.03	1.476	TraesCSU02G134900	APC
Leaf	chrUn:115656274-115656450	0.509	0.66	0.63	1.323	TraesCSU02G134900	APC
Leaf	chr5D:413286605-413286932	0.137	0.869	1.055	1.282	TraesCS5D02G321300	APC
Leaf	chr5D:464415348-464415712	0.369	1.383	1.252	0.938	TraesCS5D02G398000	NPF
Leaf	chr5D:494220017-494220287	2.103	0.526	0.912	0.518	TraesCS5D02G442000	GDH
Leaf	chr5D:540240558-540240672	0.917	1.699	1.729	2.315	TraesCS5D02G519400	AMT
Leaf	chr5D:540241337-540241630	0.51	0.749	0.715	1.272	TraesCS5D02G519400	AMT
Leaf	chr6A:9049432-9049664	1.481	0.724	1.327	1.539	TraesCS6A02G018600	AspAT
Leaf	chr6A:9049734-9049910	1.104	0.22	0.35	0.088	TraesCS6A02G018600	AspAT
Leaf	chr6B:26633753-26634959	0.149	0.439	0.286	0.708	TraesCS6B02G044400	NRT2
Leaf	chr6A:15747823-15748112	0.414	1.117	0.341	0.806	TraesCS6A02G030900	NRT2
Leaf	chr6A:15748402-15749143	0.403	1.377	0.765	1.32	TraesCS6A02G030900	NRT2
Leaf	chr6A:15766371-15766742	0.403	0.905	0.764	0.962	TraesCS6A02G031100	NRT2
Leaf	chr6A:15781034-15781255	0.676	1.87	0.725	1.546	TraesCS6A02G031200	NRT2
Leaf	chr6A:15781347-15781814	0.352	1.023	1.002	1.197	TraesCS6A02G031200	NRT2
Leaf	chr6A:15781864-15782071	0.144	0.998	0.833	0.825	TraesCS6A02G031200	NRT2
Leaf	chr6D:15383578-15384348	0.33	1.207	0.816	1.532	TraesCS6D02G037200	NRT2
Leaf	chr6A:15951954-15952068	0.131	0.68	1.08	1.634	TraesCS6A02G032400	NRT2
Leaf	chr6A:15952122-15952409	0.208	1.035	0.687	1.082	TraesCS6A02G032400	NRT2
Leaf	chr6A:16358111-16358227	0	1.558	0.849	2.275	TraesCS6A02G032800	NRT2
Leaf	chr6A:16359102-16359459	0.335	1.013	0.863	1.218	TraesCS6A02G032800	NRT2
Leaf	chr6A:16374911-16375025	0.262	1.246	0.756	1.362	TraesCS6A02G032900	NRT2
Leaf	chr6A:16386808-16387107	0.5	2.246	2.101	2.337	TraesCS6A02G033000	NRT2
Leaf	chr6A:16389979-16390093	0	2.379	4.322	5.039	TraesCS6A02G033000	NRT2
Leaf	chr6A:16390751-16390865	0.393	2.718	3.133	0.953	TraesCS6A02G033000	NRT2
Leaf	chr6A:65681827-65682687	4.934	1.231	3.036	1.679	TraesCS6A02G098500	CLC
Leaf	chr6A:65684029-65684741	4.994	1.269	3.01	1.287	TraesCS6A02G098500	CLC
Leaf	chr6A:117412647-117412807	0.093	0.161	0.924	0.776	TraesCS6A02G142600	NPF
Leaf	chr6A:181507267-181507497	1.494	0.842	0.482	0.878	TraesCS6A02G170700	APC
Leaf	chr6A:181507704-181507964	1.552	0.149	0.711	0.358	TraesCS6A02G170700	APC
Leaf	chr6A:181510297-181510523	1.719	0.457	0.163	0.069	TraesCS6A02G170700	APC
Leaf	chr6A:470212440-470214016	2.332	0.664	2.079	2.039	TraesCS6A02G254100	APC
Leaf	chr6A:516581003-516581153	0.299	2.152	1.232	0.828	TraesCS6A02G285200	APC
Leaf	chr6A:516605821-516605949	0.35	1.009	0.481	0.606	TraesCS6A02G285200	APC
Leaf	chr6A:516606132-516606246	0.655	1.472	1.296	1.362	TraesCS6A02G285200	APC
Leaf	chr6A:516606450-516606739	0.465	1.072	1.193	1.343	TraesCS6A02G285200	APC
Leaf	chr6A:559523859-559524045	1.366	1.805	1.655	2.337	TraesCS6A02G326200	NIA
Leaf	chr6A:559524640-559525185	0.987	2.203	1.605	1.681	TraesCS6A02G326200	NIA
Leaf	chr6A:559525306-559525448	1.157	2.637	3.209	3.389	TraesCS6A02G326200	NIA
Leaf	chr6A:559526216-559526467	1.488	1.595	2.503	3.526	TraesCS6A02G326200	NIA
Leaf	chr6A:580316424-580316566	0.842	0.182	0.781	0.219	TraesCS6A02G348300	APC
Leaf	chr6A:580321102-580321793	1.211	0.43	0.731	0.427	TraesCS6A02G348300	APC
Leaf	chr6A:580322177-580322446	0.889	0.384	0.641	0.808	TraesCS6A02G348300	APC
Leaf	chr6A:580536745-580536985	0.685	0.215	0.257	0.323	TraesCS6A02G348400	APC
Leaf	chr6B:15125175-15125446	2.371	3.478	1.636	1.776	TraesCS6B02G024900	NIA
Leaf	chr6B:15933785-15934129	1.65	0.563	0.931	0.496	TraesCS6B02G026900	AspAT
Leaf	chr6B:26591593-26592388	0.432	0.975	0.744	1.465	TraesCS6B02G044000	NRT2
Leaf	chr6B:26597248-26597630	0.313	0.913	1.064	1.057	TraesCS6B02G044100	NRT2
Leaf	chr6B:26617274-26617456	0.328	1.49	1.895	2.133	TraesCS6B02G044200	NRT2
Leaf	chr6B:26618212-26618345	0.225	1.65	2.408	1.401	TraesCS6B02G044200	NRT2
Leaf	chr6B:26625545-26625731	0.402	1.666	0.861	1.336	TraesCS6B02G044300	NRT2
Leaf	chr6B:26626385-26627019	0.236	0.591	0.427	0.98	TraesCS6B02G044300	NRT2
Leaf	chr6B:27123056-27123458	0.297	0.899	0.797	1.738	TraesCS6B02G045600	NRT2
Leaf	chr6B:27123749-27124225	0.314	0.868	0.75	0.946	TraesCS6B02G045600	NRT2
Leaf	chr6B:27170193-27170307	0.917	1.699	0.864	2.043	TraesCS6B02G045700	NRT2
Leaf	chr6B:27171042-27171210	0.267	1.307	1.173	1.663	TraesCS6B02G045700	NRT2
Leaf	chr6B:27685507-27685621	0.393	2.152	1.729	2.588	TraesCS6B02G046500	NRT2
Leaf	chr6B:27686121-27686962	0.355	1.52	1.186	1.551	TraesCS6B02G046500	NRT2
Leaf	chr6B:27778125-27778611	0.4	1.461	1.14	1.949	TraesCS6B02G046600	NRT2
Leaf	chr6B:52081531-52081757	0.595	1.314	1.417	2.817	TraesCS6B02G076100	NPF
Leaf	chr6B:52081827-52081959	1.019	1.663	0.746	1.411	TraesCS6B02G076100	NPF
Leaf	chr6B:52084912-52085207	0.355	1.444	1.002	1.263	TraesCS6B02G076100	NPF
Leaf	chr6B:506129727-506129923	2.058	1.054	0.566	0.713	TraesCS6B02G280000	APC
Leaf	chr6B:522641540-522641656	0.258	2.115	1.593	1.874	TraesCS6B02G290500	NPF
Leaf	chr6B:522642443-522642582	0.967	1.672	2.127	2.457	TraesCS6B02G290500	NPF
Leaf	chr6D:422075672-422075841	1.149	1.987	1.239	2.389	TraesCS6D02G313100	NIR
Leaf	chr6D:422075278-422075608	3.26	3.639	3.098	3.058	TraesCS6D02G313100	NIR
Leaf	chr6B:680798524-680798766	2.037	1.441	1.527	0.834	TraesCS6B02G406100	NPF
Leaf	chr6D:8791996-8792246	1.494	0.207	0.788	0.373	TraesCS6D02G022800	AspAT
Leaf	chr6D:14619528-14619642	0.524	1.926	1.729	2.043	TraesCS6D02G035600	NRT2
Leaf	chr6D:14619698-14620101	0.297	1.346	0.52	0.809	TraesCS6D02G035600	NRT2
Leaf	chr6D:14631794-14631908	0.262	1.472	1.296	2.451	TraesCS6D02G035700	NRT2
Leaf	chr6D:14631993-14632189	0.61	1.779	1.068	2.218	TraesCS6D02G035700	NRT2
Leaf	chr6D:14632535-14632649	0.262	1.812	0.432	2.315	TraesCS6D02G035700	NRT2
Leaf	chr6D:14634229-14634400	0	1.284	0.216	0.545	TraesCS6D02G035700	NRT2
Leaf	chr6D:14655081-14655500	0.036	1.048	0.676	0.63	TraesCS6D02G035800	NRT2
Leaf	chr6D:14655701-14655847	0.205	0.884	0.337	0.744	TraesCS6D02G035800	NRT2
Leaf	chr6D:14656046-14656198	0.393	1.104	0.648	1.021	TraesCS6D02G035800	NRT2
Leaf	chr6D:14679618-14679946	0.501	1.378	0.864	1.846	TraesCS6D02G035900	NRT2
Leaf	chr6D:15418418-15418637	0.205	1.887	0.675	1.631	TraesCS6D02G037300	NRT2
Leaf	chr6D:15419199-15419373	0.343	1.558	0.708	2.677	TraesCS6D02G037300	NRT2
Leaf	chr6D:15421023-15421222	0.3	1.492	0.495	1.404	TraesCS6D02G037300	NRT2
Leaf	chr6D:15422449-15422637	0.159	1.099	1.31	0.661	TraesCS6D02G037300	NRT2
Leaf	chr6D:15710346-15710483	0.436	2.168	1.618	2.72	TraesCS6D02G038000	NRT2
Leaf	chr6D:15713054-15713322	0.112	0.819	1.195	0.348	TraesCS6D02G038000	NRT2
Leaf	chr6D:15746685-15746854	0.265	1.834	1.093	1.837	TraesCS6D02G038100	NRT2
Leaf	chr6D:22172742-22173408	0.224	1.066	1.59	2.191	TraesCS6D02G047600	NPF
Leaf	chr6D:22173607-22173831	0	1.153	2.529	2.772	TraesCS6D02G047600	NPF
Leaf	chr6D:293799721-293799852	0.342	1.281	0.94	1.541	TraesCS6D02G208200	AMT
Leaf	chr6D:293800464-293800590	0.119	1.435	0.782	1.602	TraesCS6D02G208200	AMT
Leaf	chr6D:350205672-350205894	0.471	1.163	1.442	0.979	TraesCS6D02G247100	NPF
Leaf	chr6D:368115347-368115486	0.215	1.393	0.797	0.67	TraesCS6D02G260500	NPF
Leaf	chr6D:414628745-414628869	0.723	2.812	0.993	2.003	TraesCS6D02G306000	NIA
Leaf	chr6D:434257475-434257701	1.058	0.343	0.654	0.687	TraesCS6D02G331400	APC
Leaf	chr6D:434257833-434258091	1.216	0.5	0.716	0.662	TraesCS6D02G331400	APC
Leaf	chr6D:453993048-453993362	0.048	0.452	0.549	0.198	TraesCS6D02G363900	APC
Leaf	chr6D:454002631-454002775	0.415	1.883	1.711	0.755	TraesCS6D02G363900	APC
Leaf	chr6D:454003317-454003431	0.393	1.472	0.864	2.588	TraesCS6D02G363900	APC
Leaf	chr7A:26102374-26102738	0.534	1.171	0.575	1.194	TraesCS7A02G054000	NPF
Leaf	chr7A:26239770-26240383	0.317	1.601	0.824	1.697	TraesCS7A02G054100	NPF
Leaf	chr7A:26240500-26240856	0.378	1.451	0.934	1.396	TraesCS7A02G054100	NPF
Leaf	chr7A:43180875-43181017	1.157	1.728	1.821	4.155	TraesCS7A02G078500	NIA
Leaf	chr7A:43181591-43181778	0.399	1.933	1.844	2.491	TraesCS7A02G078500	NIA
Leaf	chr7A:58205778-58206038	0.345	1.887	2.037	2.747	TraesCS7A02G095200	NPF
Leaf	chr7A:58208995-58209230	0.318	1.923	1.101	2.312	TraesCS7A02G095200	NPF
Leaf	chr7A:58212561-58212675	0	1.812	1.405	2.588	TraesCS7A02G095200	NPF
Leaf	chr7A:58212815-58212974	0.47	1.381	1.317	1.953	TraesCS7A02G095200	NPF
Leaf	chr7A:443963306-443963501	0.843	0.596	0.063	0.876	TraesCS7A02G312800	APC
Leaf	chr7A:443963973-443964172	0.15	0.13	0.124	0.702	TraesCS7A02G312800	APC
Leaf	chr7A:443964199-443964375	0.849	0.073	0.14	0.265	TraesCS7A02G312800	APC
Leaf	chr7A:603964088-603964688	0.423	1.248	0.801	1.734	TraesCS7A02G413300	NPF
Leaf	chr7A:621911492-621912217	1.051	1.122	0.951	1.242	TraesCS7A02G428500	NRT2
Leaf	chr7A:692626933-692627329	0.566	1.239	1.057	1.333	TraesCS7A02G504300	NPF
Leaf	chr7A:692627384-692628196	0.534	0.954	1.031	1.453	TraesCS7A02G504300	NPF
Leaf	chr7A:709811093-709811235	0.947	1	2.429	1.421	TraesCS7A02G531000	NPF
Leaf	chr7A:709811659-709812046	0.463	0.567	2.355	1.123	TraesCS7A02G531000	NPF
Leaf	chr7B:18102404-18102590	0.482	1.597	1.457	1.753	TraesCS7B02G020500	NPF
Leaf	chr7B:40280153-40280374	0.406	2.103	1.616	2.951	TraesCS7B02G040100	NPF
Leaf	chr7B:114393978-114394211	0.641	0.443	2.009	2.465	TraesCS7B02G100100	APC
Leaf	chr7B:483223333-483223447	0.655	2.605	1.837	3.541	TraesCS7B02G262200	NPF
Leaf	chr7B:483223776-483223923	0.711	1.932	1.592	2.324	TraesCS7B02G262200	NPF
Leaf	chr7B:483226978-483227159	2.642	0.999	2.45	1.801	TraesCS7B02G262200	NPF
Leaf	chr7B:497966002-497966168	0.45	1.011	1.484	1.403	TraesCS7B02G271151	APC
Leaf	chr7B:497966221-497966770	0.49	0.753	0.673	1.273	TraesCS7B02G271151	APC
Leaf	chr7B:556686587-556686840	4.961	1.48	3.018	0.92	TraesCS7B02G311400	NPF
Leaf	chr7B:583926811-583926995	0.081	0.14	0.803	0	TraesCS7B02G328700	NRT2
Leaf	chr7D:25288778-25288997	0.341	1.061	1.125	0.851	TraesCS7D02G049300	NPF
Leaf	chr7D:25289285-25289399	0.262	1.472	0.324	1.77	TraesCS7D02G049300	NPF
Leaf	chr7D:25335515-25336592	0.208	0.683	0.389	1.11	TraesCS7D02G049400	NPF
Leaf	chr7D:54922583-54922780	0.531	1.376	1.563	2.285	TraesCS7D02G091600	NPF
Leaf	chr7D:54922915-54923065	0.398	1.205	1.478	2.691	TraesCS7D02G091600	NPF
Leaf	chr7D:54926210-54926687	0.564	1.137	1.394	2.311	TraesCS7D02G091600	NPF
Leaf	chr7D:89313868-89313982	0	1.699	0.54	0.136	TraesCS7D02G139600	NPF
Leaf	chr7D:141632560-141633105	1.097	0.498	0.814	0.741	TraesCS7D02G189100	APC
Leaf	chr7D:264763641-264764168	1.673	0.294	0.678	0.53	TraesCS7D02G276400	APC
Leaf	chr7D:264766599-264766794	1.916	0.265	0.632	0.318	TraesCS7D02G276400	APC
Leaf	chr7D:264771883-264772532	1.174	0.458	0.626	0.742	TraesCS7D02G276400	APC
Leaf	chr7D:392267574-392267895	0.372	0.442	0.422	1.064	TraesCS7D02G309200	APC
Leaf	chr7D:460658769-460658941	1.564	2.402	1.217	2.347	TraesCS7D02G357300	NPF
Leaf	chr7D:489677771-489677935	0.456	1.811	2.028	1.609	TraesCS7D02G378300	NPF
Leaf	chr7D:502230737-502230851	0.524	1.812	1.729	1.362	TraesCS7D02G388300	APC
Leaf	chr7D:540616917-540617321	0.666	1.726	0.701	0.692	TraesCS7D02G420900	NRT2
Leaf	chr7D:540617632-540617808	1.104	1.1	1.47	1.411	TraesCS7D02G420900	NRT2
Leaf	chr7D:617082493-617082928	3.847	1.365	2.52	0.749	TraesCS7D02G518900	NPF
Leaf	chr2A:768552755-768553112	0.251	1.302	1.208	1.392	TraesCS2A02G572100	NPF
Leaf	chr2A:768557672-768557915	0.123	0.531	0.811	0.383	TraesCS2A02G572100	NPF
Seed	chr1D:345409494-345409649	1.897	0.503	2.086	0.396	TraesCS1D02G253200	TF
Seed	chr1D:345408985-345409270	1.073	1.203	0.908	0.906	TraesCS1D02G253200	TF
Seed	chr2A:662902127-662902454	1.079	1.334	2.242	0.489	TraesCS2A02G407200	TF
Seed	chr2A:662903107-662903269	0.653	0.096	2.063	0.835	TraesCS2A02G407200	TF
Seed	chr3A:159422676-159423129	0.675	2.889	1.904	1.845	TraesCS3A02G159600	TF
Seed	chr3A:333323761-333324424	0.124	0.564	0.098	0.13	TraesCS3A02G200900	TF
Seed	chr3A:333328655-333329075	0.476	1.966	1.309	0.732	TraesCS3A02G200900	TF
Seed	chr3A:333308170-333308806	0.148	0.563	0.068	0.116	TraesCS3A02G200900	TF
Seed	chr3A:333315288-333315616	0.108	0.332	0.099	0.075	TraesCS3A02G200900	TF
Seed	chr3A:333320133-333320421	0.082	1.406	0.15	0.213	TraesCS3A02G200900	TF
Seed	chr3A:333323795-333324084	0	0	0	0	TraesCS3A02G200900	TF
Seed	chr3A:333315516-333315683	0	0	0.065	0.294	TraesCS3A02G200900	TF
Seed	chr3B:312177628-312178131	0.281	1.022	0	0.049	TraesCS3B02G225800	TF
Seed	chr3B:312155718-312155956	0.049	0.982	0.272	0.31	TraesCS3B02G225800	TF
Seed	chr3B:312169634-312169926	0.282	0.747	0.074	0.042	TraesCS3B02G225800	TF
Seed	chr3B:312187049-312187541	0.502	1.33	0.548	0.45	TraesCS3B02G225800	TF
Seed	chr3B:312187835-312188130	0.438	1.267	0.475	0.417	TraesCS3B02G225800	TF
Seed	chr3B:312167952-312168231	0.674	1.34	0.155	0.617	TraesCS3B02G225800	TF
Seed	chr3B:312177921-312178098	0	0	0	0	TraesCS3B02G225800	TF
Seed	chr3D:250919793-250920315	0.09	0.358	0.062	0.047	TraesCS3D02G203000	TF
Seed	chr3D:250923890-250924187	0.277	0.787	0.181	0.372	TraesCS3D02G203000	TF
Seed	chr3D:250926786-250927079	0.12	0.266	0.037	0.084	TraesCS3D02G203000	TF
Seed	chr3D:250930378-250930763	0.275	1.254	0.448	0.415	TraesCS3D02G203000	TF
Seed	chr3D:250919826-250920095	0	0	0	0	TraesCS3D02G203000	TF
Seed	chr3D:250926854-250926998	0	0	0	0	TraesCS3D02G203000	TF
Seed	chr5A:77325485-77325765	0.63	1.836	1.732	1.317	TraesCS5A02G068900	TF
Seed	chr6A:191230447-191230651	1.095	0	0.581	0.482	TraesCS6A02G175800	TF
Seed	chr6A:191232298-191232661	0.777	1.159	1.663	0.711	TraesCS6A02G175800	TF
Seed	chr7A:409867141-409867609	0.352	1.265	0.875	0.683	TraesCS7A02G299400	TF
Seed	chr7B:317240002-317240367	0.644	2.22	0.975	0.977	TraesCS7B02G188000	TF
Seed	chr7D:370189042-370189750	0.249	1.606	0.67	0.556	TraesCS7D02G295400	TF
Seed	chr7D:449070537-449070671	0.79	0	0.724	0.092	TraesCS7D02G349300	TF
Seed	chr7D:462282045-462282299	0.88	0.061	0.594	0.436	TraesCS7D02G359900	TF
Seed	chr1A:463965950-463966082	0.713	0.826	1.797	0.372	TraesCS1A02G269600	NPF
Seed	chr1A:553541564-553541750	0.253	0.419	0.522	0.132	TraesCS1A02G382800	ASN
Seed	chr1A:577846759-577847201	0.745	2.115	2.414	1.641	TraesCS1A02G422100	ASN
Seed	chr1A:578355766-578355949	1.028	0.17	0.471	0.201	TraesCS1A02G423000	SLAH
Seed	chr1A:578356336-578356958	0.832	0.351	0.503	0.138	TraesCS1A02G423000	SLAH
Seed	chr1A:578933165-578933552	0.851	0.443	0.557	0.254	TraesCS1A02G423900	SLAH
Seed	chrUn:1928080-1928311	1.527	0.607	0.933	0.16	TraesCSU02G001500	SLAH
Seed	chrUn:1925844-1926471	0.975	0.87	1.289	0.529	TraesCSU02G001500	SLAH
Seed	chr1D:40001821-40002025	0.403	0.229	0.898	0.06	TraesCS1D02G059900	APC
Seed	chr1B:403579228-403579525	0.792	0.367	1.161	0.372	TraesCS1B02G225000	NPF
Seed	chr1B:622365114-622365536	1.142	0.295	0.485	0.233	TraesCS1B02G388600	SLAH
Seed	chr1B:622366628-622366735	1.758	3.64	1.511	0.345	TraesCS1B02G388600	SLAH
Seed	chr1B:670799676-670799836	0.661	0.487	0.674	0.307	TraesCS1B02G456000	SLAH
Seed	chr1B:670898972-670899441	1.153	1.129	1.701	0.236	TraesCS1B02G456200	SLAH
Seed	chr1B:670899745-670900177	0.898	0.902	1.148	0.228	TraesCS1B02G456200	SLAH
Seed	chr1B:670916526-670916742	0.544	0.793	1.248	0.171	TraesCS1B02G456300	SLAH
Seed	chr1B:670956295-670956683	0.97	0.803	1.473	0.348	TraesCS1B02G456500	SLAH
Seed	chr1B:670957223-670957330	1.648	1.165	1.713	0.459	TraesCS1B02G456500	SLAH
Seed	chr1B:670956828-670957078	0.564	1.371	0.949	0.492	TraesCS1B02G456500	SLAH
Seed	chr1D:13037786-13037924	1.108	0	0.156	0.445	TraesCS1D02G032700	NPF
Seed	chr1D:13041579-13041758	1.511	1.654	0.903	0.412	TraesCS1D02G032700	NPF
Seed	chr1D:13042038-13042379	1.172	1.051	0.695	0.216	TraesCS1D02G032700	NPF
Seed	chr1D:16504872-16505380	0.718	0.705	0.615	0.169	TraesCS1D02G035700	NRT2
Seed	chr1D:62599227-62599817	1.216	0.819	0.347	0.417	TraesCS1D02G079900	APC
Seed	chr1D:62600191-62600377	1.517	1.34	0.985	0.793	TraesCS1D02G079900	APC
Seed	chr1D:62601462-62601584	1.253	0.255	0.972	0.101	TraesCS1D02G079900	APC
Seed	chr1D:299582249-299582379	0.724	1.438	1.41	0.756	TraesCS1D02G214300	NPF
Seed	chr1D:299582670-299582803	0.707	0.937	1.378	0.37	TraesCS1D02G214300	NPF
Seed	chr1D:482275849-482276251	0.731	0.543	0.483	0.245	TraesCS1D02G432700	SLAH
Seed	chr1D:482272339-482272515	0.735	0.62	1.225	0.21	TraesCS1D02G432700	SLAH
Seed	chr1D:482368810-482369404	0.95	0.734	1.561	0.352	TraesCS1D02G432900	SLAH
Seed	chr1D:482369618-482369975	0.659	0.742	1.027	0.551	TraesCS1D02G432900	SLAH
Seed	chr1D:483518275-483518520	1.152	0.699	1.628	1.104	TraesCS1D02G434300	APC
Seed	chr1D:483526020-483526158	1.704	0.452	1.64	0.891	TraesCS1D02G434300	APC
Seed	chr2A:3337931-3338127	0.9	0.795	1.76	0.314	TraesCS2A02G007500	NPF
Seed	chr2B:28174407-28174562	1.441	0.503	0.626	0.238	TraesCS2B02G057700	NPF
Seed	chr2B:28175045-28175167	1.253	0.128	1.06	0.302	TraesCS2B02G057700	NPF
Seed	chr2B:28175839-28175991	0.542	0.205	0.922	0.162	TraesCS2B02G057700	NPF
Seed	chr2A:471014556-471014683	0.833	0.736	1.528	0.387	TraesCS2A02G282000	APC
Seed	chr2A:572841714-572841821	1.429	1.747	1.209	0.919	TraesCS2A02G339100	APC
Seed	chr2A:572841995-572842154	1.479	0.882	0.881	0.464	TraesCS2A02G339100	APC
Seed	chr2A:569901985-569902434	0.471	0.139	0.384	0.137	TraesCS2A02G335800	NPF
Seed	chr2A:569902296-569902403	0	0	0	0	TraesCS2A02G335800	NPF
Seed	chr2A:639054693-639055008	1.195	0.841	0.856	0.585	TraesCS2A02G390100	APC
Seed	chr2A:768571250-768571564	1.086	0.397	0.515	0.274	TraesCS2A02G572200	NPF
Seed	chr2A:768523520-768523757	0.943	0.263	0	0	TraesCS2A02G571900	NPF
Seed	chr2A:768526398-768526680	0.167	0	0.076	0	TraesCS2A02G571900	NPF
Seed	chr2A:768526377-768526605	0	0	0.047	0	TraesCS2A02G571900	NPF
Seed	chr2A:768472551-768472755	1.095	0.153	1.321	0.542	TraesCS2A02G571800	NPF
Seed	chr2A:768469212-768469644	0.953	0.505	0.898	0.512	TraesCS2A02G571800	NPF
Seed	chr2B:31609964-31610112	1.43	0.316	0.801	0.166	TraesCS2B02G065200	APC
Seed	chr2B:31608473-31608808	1.018	0.651	0.644	0.147	TraesCS2B02G065200	APC
Seed	chr2B:121370158-121370296	0.852	0	0.391	0.802	TraesCS2B02G152900	GOGAT
Seed	chr2B:121370907-121371057	0.862	0	1.006	0.574	TraesCS2B02G152900	GOGAT
Seed	chr2B:492795258-492795535	0.509	0.112	0.272	0.177	TraesCS2B02G346100	NPF
Seed	chr2B:492795337-492795484	0	0	0	0	TraesCS2B02G346100	NPF
Seed	chr2B:525562700-525562890	0.99	0	0.397	0.647	TraesCS2B02G368400	NPF
Seed	chr2B:659005565-659005728	1.515	0.669	0.661	0.302	TraesCS2B02G464700	NPF
Seed	chr2A:713015768-713017132	1.164	1.005	0.656	0.387	TraesCS2A02G470200	APC
Seed	chr2B:798743106-798743223	0.905	1.864	0.921	0.21	TraesCS2B02G626700	NPF
Seed	chr2B:798744012-798744281	0.962	2.664	0.641	0.228	TraesCS2B02G626700	NPF
Seed	chr2B:798589628-798589778	0.549	0.415	0.575	0.246	TraesCS2B02G626100	NPF
Seed	chr2B:798590308-798590586	0.677	0.448	0.504	0.044	TraesCS2B02G626100	NPF
Seed	chr2B:798591071-798591236	0.713	1.605	0.588	0.149	TraesCS2B02G626100	NPF
Seed	chr2D:5086847-5087487	1.084	0.779	0.775	0.326	TraesCS2D02G009100	NPF
Seed	chrUn:24264715-24264934	0.966	0.356	0.64	0.337	TraesCSU02G023100	APC
Seed	chr2D:30788172-30788468	0.755	0.316	0.364	0.208	TraesCS2D02G073500	NRT2
Seed	chr2D:30784721-30784917	0.24	0.636	0.165	0	TraesCS2D02G073500	NRT2
Seed	chr2D:417086462-417086808	1.155	1.036	0.779	0.391	TraesCS2D02G324000	APC
Seed	chr2D:417087037-417087211	1.622	1.433	1.921	0.283	TraesCS2D02G324000	APC
Seed	chr2D:420311597-420311817	0.962	0.142	0.588	0.279	TraesCS2D02G327000	NPF
Seed	chr2D:446596717-446597383	0.282	0.187	0.34	0.591	TraesCS2D02G348600	NPF
Seed	chr2D:494657006-494657113	0.879	0.437	1.108	0.23	TraesCS2D02G388600	APC
Seed	chr2D:643768505-643768754	0.047	0	0.087	0	TraesCS2D02G583600	NPF
Seed	chr2D:643768944-643769576	0.26	0.247	0.205	0.078	TraesCS2D02G583600	NPF
Seed	chr2D:643768472-643768599	0.093	0	0	0.097	TraesCS2D02G583600	NPF
Seed	chr2D:643768671-643768780	0	0	0	0	TraesCS2D02G583600	NPF
Seed	chr2D:643768936-643769141	0	0	0	0	TraesCS2D02G583600	NPF
Seed	chr2D:643769452-643769559	0	0	0	0	TraesCS2D02G583600	NPF
Seed	chr2D:643745874-643746074	0.235	0	0.377	0.86	TraesCS2D02G583500	NPF
Seed	chr3A:32875375-32875728	0.833	0.971	0.825	0.209	TraesCS3A02G057000	NPF
Seed	chr3A:32876181-32876335	1.756	1.821	1.33	0.319	TraesCS3A02G057000	NPF
Seed	chr3A:343179726-343179912	0.316	0.67	0.174	0.33	TraesCS3A02G202500	GDH
Seed	chr3A:631728315-631728554	0.836	1.304	1.443	0.617	TraesCS3A02G381600	AMT
Seed	chr3A:632286892-632287022	1.176	0.36	1.576	0.756	TraesCS3A02G382200	NPF
Seed	chr3A:640698985-640699515	0.643	1.176	0.915	0.209	TraesCS3A02G392800	NPF
Seed	chr3A:651648484-651648622	1.449	1.129	1.172	0.534	TraesCS3A02G406800	APC
Seed	chr3A:651962672-651962868	0.72	0.715	0.825	0.125	TraesCS3A02G406900	APC
Seed	chr3A:651963409-651963526	2.01	1.198	1.382	0.42	TraesCS3A02G406900	APC
Seed	chr3A:714364752-714365430	0.676	0.345	0.525	0.199	TraesCS3A02G484862	APC
Seed	chr3B:772723780-772724388	0.542	0.102	0.23	0.081	TraesCS3B02G532100	APC
Seed	chr3B:772726267-772726453	1.328	1.005	1.043	0.33	TraesCS3B02G532100	APC
Seed	chr3B:772723745-772723889	0.163	0.108	0.225	0.085	TraesCS3B02G532100	APC
Seed	chr3B:772724250-772724403	0.077	0	0.141	0	TraesCS3B02G532100	APC
Seed	chr3D:578775296-578775760	0.786	0.336	0.325	0.053	TraesCS3D02G479800	APC
Seed	chr3D:578776001-578776478	0.592	0.229	0.768	0.258	TraesCS3D02G479800	APC
Seed	chr3B:42126094-42126472	0.902	1.319	1.084	0.52	TraesCS3B02G070200	NPF
Seed	chr3B:183073519-183073823	1.315	0.205	1.489	0.647	TraesCS3B02G178600	SLAH
Seed	chr3B:227668320-227668475	1.745	1.005	1.739	0.872	TraesCS3B02G199200	SLAH
Seed	chr3B:322291526-322291699	0.816	1.351	0.561	0.426	TraesCS3B02G227100	GDH
Seed	chr3B:322290856-322291226	0.127	1.137	0.175	0.432	TraesCS3B02G227100	GDH
Seed	chr3B:322299555-322299741	0.126	1.34	0.406	0.595	TraesCS3B02G227100	GDH
Seed	chr3B:322292876-322293020	0.163	1.731	0.374	1.28	TraesCS3B02G227100	GDH
Seed	chr3B:410776404-410776567	2.308	3.059	4.762	3.092	TraesCS3B02G254700	SLAH
Seed	chr3B:537468786-537469076	1.135	0.698	0.595	0.297	TraesCS3B02G332100	NPF
Seed	chr3B:662550880-662551095	0.875	1.159	1.103	0.343	TraesCS3B02G424700	NPF
Seed	chr3B:680480028-680480371	0.994	0.5	0.346	0.358	TraesCS3B02G441100	APC
Seed	chr3B:680478420-680478620	0.706	0.467	0.862	0.123	TraesCS3B02G441100	APC
Seed	chr3B:689682723-689682861	1.875	1.355	1.484	0.356	TraesCS3B02G449100	APC
Seed	chr3D:23729687-23730084	0.444	0.314	0.217	0.031	TraesCS3D02G056700	NPF
Seed	chr3D:23730085-23731019	0.755	0.517	0.542	0.263	TraesCS3D02G056700	NPF
Seed	chr3D:23729881-23729988	0	0	0	0	TraesCS3D02G056700	NPF
Seed	chr3D:23857550-23858596	0.348	0.238	0.412	0.141	TraesCS3D02G057000	NPF
Seed	chr3D:23857551-23857786	0	0	0	0	TraesCS3D02G057000	NPF
Seed	chr3D:156723443-156723593	1.725	0.831	3.378	1.557	TraesCS3D02G174800	SLAH
Seed	chr3D:156726894-156727197	1.125	0.617	1.743	0.608	TraesCS3D02G174800	SLAH
Seed	chr3D:477560785-477560923	1.363	0.339	2.343	1.603	TraesCS3D02G363200	APC
Seed	chr3D:477563053-477563239	0.885	0.586	1.101	0.264	TraesCS3D02G363200	APC
Seed	chr3D:488581808-488582075	0.749	0.35	0.767	0.368	TraesCS3D02G375300	NPF
Seed	chr3D:516672111-516672323	1.054	0.514	0.458	0.174	TraesCS3D02G402200	APC
Seed	chr3D:516855485-516855817	1.452	0.657	0.747	0.481	TraesCS3D02G402300	APC
Seed	chr3D:578673826-578674422	0.848	0.471	0.452	0.144	TraesCS3D02G479700	APC
Seed	chr4A:11986036-11986509	0.398	0.165	0.114	0	TraesCS4A02G018400	APC
Seed	chr4A:11987687-11988233	0.948	0.457	0.355	0.09	TraesCS4A02G018400	APC
Seed	chr4A:11985938-11986081	0.329	0.109	0.226	0.258	TraesCS4A02G018400	APC
Seed	chr4A:11986419-11986707	0.327	0.108	0.374	0.043	TraesCS4A02G018400	APC
Seed	chr4A:60659657-60660097	0.668	0.071	0.563	0.587	TraesCS4A02G063800	GS
Seed	chr4A:75355404-75355703	0.865	0.052	0.721	0.411	TraesCS4A02G076000	NPF
Seed	chr4A:550467535-550467790	0.646	0.061	0.127	0.145	TraesCS4A02G240700	APC
Seed	chr4A:651363601-651363793	1.225	0.73	0.674	0.192	TraesCS4A02G376700	NIA
Seed	chr4A:651364425-651364583	1.786	0.789	0.955	0.545	TraesCS4A02G376700	NIA
Seed	chr4A:651369301-651370256	0.579	0.294	0.181	0.051	TraesCS4A02G376700	NIA
Seed	chr4A:651369697-651370096	0	0	0	0	TraesCS4A02G376700	NIA
Seed	chr4A:709716424-709717242	0.446	0.133	0.105	0.06	TraesCS4A02G440700	NPF
Seed	chr4A:709717358-709717667	0.076	0.05	0.035	0	TraesCS4A02G440700	NPF
Seed	chr4A:709716739-709716846	0	0	0	0	TraesCS4A02G440700	NPF
Seed	chr4A:709717238-709717465	0	0	0.047	0	TraesCS4A02G440700	NPF
Seed	chr4A:709717568-709717675	0	0	0.101	0	TraesCS4A02G440700	NPF
Seed	chr4A:709612949-709613081	0.891	1.062	1.552	0.559	TraesCS4A02G440600	NPF
Seed	chr4A:709613583-709613810	1.191	0.686	0.902	0.379	TraesCS4A02G440600	NPF
Seed	chr4A:709206108-709206623	0.662	0.545	0.9	0.501	TraesCS4A02G440300	NPF
Seed	chr4B:9707824-9708121	0.436	1.416	0.907	0.952	TraesCS4B02G013800	APC
Seed	chr4B:69429717-69429939	1.059	0.421	0.777	0.221	TraesCS4B02G074300	APC
Seed	chr4B:69430476-69431058	0.505	0.241	0.222	0.042	TraesCS4B02G074300	APC
Seed	chr4B:69430680-69430795	0	0	0	0	TraesCS4B02G074300	APC
Seed	chr4B:93412326-93412507	1.104	0.516	0.893	0.272	TraesCS4B02G090800	NPF
Seed	chr4B:568879040-568879175	0.348	0.577	0.719	0.091	TraesCS4B02G285500	APC
Seed	chr4B:568879558-568879685	0.741	0.123	0.679	0	TraesCS4B02G285500	APC
Seed	chr4B:568879229-568879389	0.735	0.292	0.404	0.384	TraesCS4B02G285500	APC
Seed	chr4B:642924769-642925047	1.269	1.065	0.776	0.088	TraesCS4B02G350000	APC
Seed	chr4B:659567640-659568171	0.886	0.44	0.853	0.301	TraesCS4B02G375800	NPF
Seed	chr4D:121185145-121185319	1.554	0.716	0	0	TraesCS4D02G134400	APC
Seed	chr4D:403137203-403137451	0.853	0.314	0.913	0.446	TraesCS4D02G240700	GS
Seed	chr4D:508270618-508270808	0.99	0.082	0.511	0.259	TraesCS4D02G361500	NPF
Seed	chr4D:508271118-508271308	0.805	0.574	0.284	0.065	TraesCS4D02G361500	NPF
Seed	chr5A:19975820-19976280	0.869	0.948	1.804	1.363	TraesCS5A02G025400	APC
Seed	chr5A:38789759-38789985	0.728	0.62	1.288	0.163	TraesCS5A02G042900	APC
Seed	chr5A:331396153-331396605	0.78	0.793	2.218	0.625	TraesCS5A02G153900	ASN
Seed	chr5A:584906357-584906489	0.713	1.18	1.225	0.186	TraesCS5A02G388100	AMT
Seed	chr5A:656491031-656491297	1.238	0.586	1.418	0.786	TraesCS5A02G485200	NPF
Seed	chr5A:656668010-656668222	0.777	0.588	1.475	0.406	TraesCS5A02G485300	NPF
Seed	chrUn:100088042-100088257	1.039	0.072	0.351	0.457	TraesCSU02G115500	NPF
Seed	chr5A:672840192-672840330	1.875	0.564	1.562	0.713	TraesCS5A02G508500	NPF
Seed	chr5B:866630-866768	1.278	0.339	2.343	1.069	TraesCS5B02G001100	NPF
Seed	chr5B:107564279-107564417	0.682	0.113	0.391	0.534	TraesCS5B02G084900	APC
Seed	chr5B:197192431-197193418	0.453	1.089	0.601	0.336	TraesCS5B02G116100	APC
Seed	chr5B:281838226-281838364	1.193	0.113	0.547	1.158	TraesCS5B02G152600	ASN
Seed	chr5B:426565176-426565864	1.094	0.838	0.768	0.304	TraesCS5B02G245300	NPF
Seed	chr5B:547406220-547406458	0.296	0.065	0.408	0.62	TraesCS5B02G368800	APC
Seed	chr5B:571523270-571524024	0.983	0.289	0.343	0.293	TraesCS5B02G393100	NPF
Seed	chr5B:571530580-571530962	0.862	0.326	0.734	0.322	TraesCS5B02G393100	NPF
Seed	chr5B:682536799-682536983	0.575	0.423	1.347	0.2	TraesCS5B02G520200	AMT
Seed	chr5D:49294345-49294535	0.619	0.082	0.681	0.259	TraesCS5D02G051400	APC
Seed	chr5D:49295837-49295944	1.539	1.019	0.907	0.23	TraesCS5D02G051400	APC
Seed	chr5D:247608835-247609116	0.962	0	0.384	0.35	TraesCS5D02G159100	ASN
Seed	chr5D:464415416-464415842	0.635	0.366	0.962	0.115	TraesCS5D02G398000	NPF
Seed	chr5D:528412148-528412286	1.619	0.677	2.031	0.98	TraesCS5D02G498700	NPF
Seed	chr6B:26634662-26634915	0.651	0.308	0.17	0.243	TraesCS6B02G044400	NRT2
Seed	chr6A:15758012-15758150	0.596	0	0.234	0.089	TraesCS6A02G031000	NRT2
Seed	chr6A:15766267-15766656	0.423	0.24	0.554	0.063	TraesCS6A02G031100	NRT2
Seed	chr6D:15383752-15384239	0.676	0.128	0.465	0.101	TraesCS6D02G037200	NRT2
Seed	chr6D:15384480-15384666	0.379	0.251	0.29	0.33	TraesCS6D02G037200	NRT2
Seed	chr6A:16357302-16357440	0.767	0	0	0.178	TraesCS6A02G032800	NRT2
Seed	chr6A:16359365-16359566	0.995	0.31	0.215	0	TraesCS6A02G032800	NRT2
Seed	chr6A:16386608-16386758	1.254	0.312	0.719	0.328	TraesCS6A02G033000	NRT2
Seed	chr6A:16389823-16390165	0.688	0.41	0.378	0.288	TraesCS6A02G033000	NRT2
Seed	chr6A:117412725-117412959	0.302	0.599	0.829	0.525	TraesCS6A02G142600	NPF
Seed	chr6A:455705006-455705149	1.562	0	2.035	1.547	TraesCS6A02G244400	APC
Seed	chr6A:516582640-516582947	0.613	0.152	0.983	0.44	TraesCS6A02G285200	APC
Seed	chr6A:580539626-580539858	0.558	1.612	0.697	0.636	TraesCS6A02G348400	APC
Seed	chr6A:595061558-595061706	1.033	0.526	1.53	0.664	TraesCS6A02G369900	NPF
Seed	chr6B:26592428-26592582	0.458	0.405	0.91	0.239	TraesCS6B02G044000	NRT2
Seed	chr6B:26597277-26597861	0.544	0.107	0.185	0.084	TraesCS6B02G044100	NRT2
Seed	chr6B:26598658-26598796	0.596	0	0.547	0.178	TraesCS6B02G044100	NRT2
Seed	chr6B:26617464-26617655	0.369	0.163	0.621	0.257	TraesCS6B02G044200	NRT2
Seed	chr6B:27170665-27170879	0.989	0.291	0.252	0.057	TraesCS6B02G045700	NRT2
Seed	chr6B:27169802-27170175	0.662	0.418	0.434	0.099	TraesCS6B02G045700	NRT2
Seed	chr6B:27172372-27172542	0.069	0.092	0.698	0.217	TraesCS6B02G045700	NRT2
Seed	chr6B:27172692-27172812	0.294	0.13	1.078	0	TraesCS6B02G045700	NRT2
Seed	chr6B:27685689-27685879	0.866	0.164	0.284	0	TraesCS6B02G046500	NRT2
Seed	chr6B:27686294-27686928	0.519	0.295	0.289	0.116	TraesCS6B02G046500	NRT2
Seed	chr6B:27686142-27686452	0.114	0	0.348	0.079	TraesCS6B02G046500	NRT2
Seed	chr6B:27779171-27779384	1.049	0.219	0.607	0.058	TraesCS6B02G046600	NRT2
Seed	chr6B:27778125-27778871	0.694	0.313	0.361	0.165	TraesCS6B02G046600	NRT2
Seed	chr6B:52081474-52081941	0.73	0.534	0.208	0.184	TraesCS6B02G076100	NPF
Seed	chr6B:52084942-52085183	1.757	1.422	0.939	0.459	TraesCS6B02G076100	NPF
Seed	chr6B:52081677-52081803	0	0	0	0	TraesCS6B02G076100	NPF
Seed	chr6B:506129765-506129903	1.619	0.226	1.64	1.336	TraesCS6B02G280000	APC
Seed	chr6B:625241276-625241650	0.817	1.083	1.816	0.559	TraesCS6B02G356800	NIA
Seed	chr6B:680798533-680798737	1.499	0.916	1.163	0.904	TraesCS6B02G406100	NPF
Seed	chr6D:14632546-14632864	0.592	0.147	0.203	0.193	TraesCS6D02G035700	NRT2
Seed	chr6D:14631617-14632324	0.848	0.353	0.488	0.122	TraesCS6D02G035700	NRT2
Seed	chr6D:15419332-15419470	1.108	0.226	0.469	0.445	TraesCS6D02G037300	NRT2
Seed	chr6D:15420986-15421167	0.78	0.172	0.715	0.204	TraesCS6D02G037300	NRT2
Seed	chr6D:15656841-15657113	0.778	0	0.119	0.226	TraesCS6D02G037800	NRT2
Seed	chr6D:15712998-15713148	1.333	0	0.575	0.082	TraesCS6D02G038000	NRT2
Seed	chr6D:15746431-15746616	1.017	0.084	0.466	0.133	TraesCS6D02G038100	NRT2
Seed	chr6D:15746845-15747021	0.869	0.177	0.367	0.489	TraesCS6D02G038100	NRT2
Seed	chr6D:22173202-22173791	0.838	0.317	1.043	0.396	TraesCS6D02G047600	NPF
Seed	chr6D:28248188-28248326	1.193	0.564	0.703	0.178	TraesCS6D02G060200	NPF
Seed	chr6D:350082474-350082582	1.307	0	0.998	0.228	TraesCS6D02G247000	NPF
Seed	chr6D:350083463-350083570	1.648	1.31	1.209	0.23	TraesCS6D02G247000	NPF
Seed	chr6D:350084430-350084589	0.666	0.294	0.881	0.387	TraesCS6D02G247000	NPF
Seed	chr6D:368115538-368115755	1.084	0.431	1.043	0.227	TraesCS6D02G260500	NPF
Seed	chr6D:368112472-368112728	1.194	0.609	1.221	0.336	TraesCS6D02G260500	NPF
Seed	chr6D:368115011-368115177	0.779	0.188	1.429	0.37	TraesCS6D02G260500	NPF
Seed	chr6D:454002767-454002944	0.731	0.176	0.548	0.069	TraesCS6D02G363900	APC
Seed	chr6D:453993080-453993298	0.27	0.071	0.297	0.564	TraesCS6D02G363900	APC
Seed	chr7A:26102979-26103086	1.978	1.456	1.511	0.574	TraesCS7A02G054000	NPF
Seed	chr7A:26240030-26240373	0.857	0.818	0.786	0.251	TraesCS7A02G054100	NPF
Seed	chr7A:26240588-26240712	0.948	0.503	0.956	0	TraesCS7A02G054100	NPF
Seed	chr7A:26240831-26240984	0.077	0.305	0.493	0.08	TraesCS7A02G054100	NPF
Seed	chr7A:43180924-43181252	1.04	0.617	0.756	0.187	TraesCS7A02G078500	NIA
Seed	chr7A:58208932-58209102	1.937	0.183	1.205	0.361	TraesCS7A02G095200	NPF
Seed	chr7A:58205695-58206079	0.122	0.122	0.14	0	TraesCS7A02G095200	NPF
Seed	chr7A:58212499-58212983	0.146	0.097	0.134	0.025	TraesCS7A02G095200	NPF
Seed	chr7A:58205770-58206038	0	0	0	0	TraesCS7A02G095200	NPF
Seed	chr7A:58212494-58212856	0.032	0	0.03	0	TraesCS7A02G095200	NPF
Seed	chr7A:556358178-556358589	0.83	0.227	0.603	0.15	TraesCS7A02G381700	NPF
Seed	chr7A:621911549-621911826	1.146	1.069	0.895	0.222	TraesCS7A02G428500	NRT2
Seed	chr7A:621910713-621911105	0.84	0.358	1.182	0.282	TraesCS7A02G428500	NRT2
Seed	chr7A:692627197-692628415	0.772	0.55	0.416	0.272	TraesCS7A02G504300	NPF
Seed	chr7B:388958846-388958984	1.023	0.564	0.625	0.534	TraesCS7B02G213000	APC
Seed	chr7B:498089495-498089733	1.087	0.393	0.996	0.62	TraesCS7B02G271200	APC
Seed	chr7B:583922823-583923231	0.519	0.42	0.74	0.211	TraesCS7B02G328700	NRT2
Seed	chr7D:43215781-43216874	0.796	0.371	0.473	0.191	TraesCS7D02G073700	NIA
Seed	chr7D:54926077-54926726	0.344	0.36	0.316	0.095	TraesCS7D02G091600	NPF
Seed	chr7D:54926310-54926527	0	0	0	0	TraesCS7D02G091600	NPF
Seed	chr7D:264763411-264763990	0.122	0.834	0.205	0.191	TraesCS7D02G276400	APC
Seed	chr7D:502231385-502231821	0.863	0.429	0.47	0.197	TraesCS7D02G388300	APC
Seed	chr7D:502232475-502232823	1.081	0.761	0.681	0.247	TraesCS7D02G388300	APC
Seed	chr7D:540616829-540617161	1.169	0.798	1.331	0.259	TraesCS7D02G420900	NRT2
Seed	chr7D:540617696-540617814	1.594	1.848	1.37	0.208	TraesCS7D02G420900	NRT2

## Sheet: TableS1C
Differential H3K27me3 peaks of NMGs
Tissue	Diff_H3K27me3_peaks	H3K27me3_KN9204_NN (FPKM)	H3K27me3_KN9204_LN(FPKM)	H3K27me3_J411_NN(FPKM)	H3K27me3_J411_LN(FPKM)	Gene ID	Family
Root	chr1B:480439701-480440027	1.479	1.455	0.48	1.613	TraesCS1B02G273300	TF
Root	chr1D:356930024-356930648	0.574	0.974	0.143	0.923	TraesCS1D02G262700	TF
Root	chr1D:356935669-356935812	0.771	1.555	0.156	2.014	TraesCS1D02G262700	TF
Root	chr2A:662905451-662905630	0.077	0.083	0.625	0.07	TraesCS2A02G407200	TF
Root	chr2B:102125683-102126050	0	0	0	0	TraesCS2B02G135600	TF
Root	chr2B:102125232-102126044	0.119	0.256	0.028	0.262	TraesCS2B02G135600	TF
Root	chr2B:102126714-102126923	0.725	1.774	0.107	1.138	TraesCS2B02G135600	TF
Root	chr2B:751320234-751320387	0.72	0.194	0.438	0	TraesCS2B02G556600	TF
Root	chr2D:616527586-616527799	0.065	0	0.63	0.118	TraesCS2D02G529000	TF
Root	chr3B:718850783-718850993	0.066	0.071	0.639	0	TraesCS3B02G470700	TF
Root	chr3B:312146022-312146294	0.203	0.382	3.37	1.151	TraesCS3B02G225800	TF
Root	chr3D:250919711-250920010	0	0.099	0.523	0.251	TraesCS3D02G203000	TF
Root	chr5B:554725589-554725768	0.231	0.166	0.625	0.07	TraesCS5B02G376900	TF
Root	chr5D:475209006-475209706	0	0.042	0	0	TraesCS5D02G411800	TF
Root	chr5D:475208926-475209648	0	0	0.031	0	TraesCS5D02G411800	TF
Root	chr6D:151948983-151949126	0.096	0.726	0.156	0.876	TraesCS6D02G167800	TF
Root	chr7A:553043337-553043517	0	0.082	0.745	0	TraesCS7A02G377600	TF
Root	chr7D:462281984-462282694	2.445	2.527	0.283	2.61	TraesCS7D02G359900	TF
Root	chr1A:14518248-14518420	2.083	1.724	0.65	9.026	TraesCS1A02G031300	NPF
Root	chr1A:449624215-449625901	0.662	0.739	1.22	0.572	TraesCS1A02G257400	NPF
Root	chr1A:449822993-449823518	0.131	0.621	0.17	0.024	TraesCS1A02G257900	NPF
Root	chr1A:449823603-449823831	0.423	0.325	0.981	0.22	TraesCS1A02G257900	NPF
Root	chr1A:449832846-449833123	0.298	0.268	0	0.678	TraesCS1A02G257900	NPF
Root	chr1A:463930602-463930781	0	0.083	0.625	0.07	TraesCS1A02G269500	NPF
Root	chrUn:1924333-1924905	1.59	1.296	1.72	2.911	TraesCSU02G001500	SLAH
Root	chr1D:137967454-137967921	0.354	0.762	0.814	0.295	TraesCS1D02G126500	SLAH
Root	chr1D:137968924-137969183	0.585	0.63	1.467	0.338	TraesCS1D02G126500	SLAH
Root	chr1B:403578192-403578921	0	0	0	0	TraesCS1B02G225000	NPF
Root	chr1B:403578160-403579403	0.1	0.119	0.054	0.262	TraesCS1B02G225000	NPF
Root	chr1B:471173993-471175291	0.499	0.583	0.878	0.222	TraesCS1B02G268300	NPF
Root	chr1B:673785984-673786281	0.278	0.349	0.678	0.126	TraesCS1B02G459800	APC
Root	chr1D:299582002-299582500	0.277	1.012	0.404	0.478	TraesCS1D02G214300	NPF
Root	chr1D:299582670-299583467	0.138	0.372	0.084	0.613	TraesCS1D02G214300	NPF
Root	chr1D:349254223-349255912	0.375	0.676	1.006	0.348	TraesCS1D02G256700	NPF
Root	chr1D:349479339-349479600	0.211	0.284	0.771	0.144	TraesCS1D02G257100	NPF
Root	chr1D:349538171-349538703	0.104	0.251	0.672	0.141	TraesCS1D02G257200	NPF
Root	chr1D:360465465-360466142	1.384	1.489	0.991	1.979	TraesCS1D02G264700	APC
Root	chr1D:416475640-416475864	0.369	0.199	0.299	0.671	TraesCS1D02G324200	NIR
Root	chr3D:497721059-497722157	0.427	0.405	0.957	0.342	TraesCS3D02G381500	APC
Root	chr3D:496506430-496506996	0.536	0.576	0.79	0.332	TraesCS3D02G379600	CLC
Root	chr1D:483529204-483530113	0.364	0.538	0.344	0.813	TraesCS1D02G434300	APC
Root	chr2A:532086731-532086910	0	0.083	0.625	0	TraesCS2A02G309100	NPF
Root	chr2A:532090832-532091099	0	0.056	0.084	0.844	TraesCS2A02G309100	NPF
Root	chr2A:572840962-572842302	0.216	0.542	0.384	0.121	TraesCS2A02G339100	APC
Root	chr2A:572842148-572842320	0	0	0	0	TraesCS2A02G339100	APC
Root	chr2A:570930073-570930340	0	0	0	0	TraesCS2A02G337400	APC
Root	chr2A:570930095-570930340	0	0	0	0	TraesCS2A02G337400	APC
Root	chr2A:564104285-564105607	0.323	0.639	0.304	0.455	TraesCS2A02G331100	APC
Root	chr2A:639054781-639055002	0.811	0.738	0	0.793	TraesCS2A02G390100	APC
Root	chr2A:661712168-661714390	0.688	0.667	1.187	0.49	TraesCS2A02G406000	APC
Root	chr2A:768514619-768514811	3.947	3.166	1.514	2.543	TraesCS2A02G571900	NPF
Root	chr2A:768526378-768526582	1.959	1.89	0.877	3.069	TraesCS2A02G571900	NPF
Root	chr2A:765056426-765056695	0.615	0.055	0.083	0.326	TraesCS2A02G565600	NPF
Root	chr2A:765052945-765053982	0.239	0.229	1.703	0.749	TraesCS2A02G565600	NPF
Root	chr2A:765056582-765056725	0	0	0	0	TraesCS2A02G565600	NPF
Root	chr2D:639681978-639682121	0.096	0.104	0	1.663	TraesCS2D02G576000	NPF
Root	chr2B:28096057-28096201	2.679	2.78	2.018	3.826	TraesCS2B02G057600	NPF
Root	chr2B:609948039-609950083	0.849	0.631	1.225	0.496	TraesCS2B02G423700	APC
Root	chr2B:742821819-742822332	0.564	0.26	0.131	0.073	TraesCS2B02G546000	CLC
Root	chr2B:798743353-798743567	1.03	0.762	2.507	0.936	TraesCS2B02G626700	NPF
Root	chr2B:798732251-798732704	1.278	0.786	0.938	1.023	TraesCS2B02G626600	NPF
Root	chr2B:798589083-798589221	1.198	0.43	0	0	TraesCS2B02G626100	NPF
Root	chr2B:798579101-798579239	0.699	0.215	0	0.363	TraesCS2B02G626000	NPF
Root	chr2B:798582236-798582970	0.282	0.141	2.163	0.819	TraesCS2B02G626000	NPF
Root	chrUn:24263213-24263415	3.82	3.597	2.988	3.595	TraesCSU02G023100	APC
Root	chrUn:24264715-24265031	3.75	4.364	3.467	2.853	TraesCSU02G023100	APC
Root	chrUn:24267456-24267846	5.017	5.627	0.86	4.045	TraesCSU02G023100	APC
Root	chr2D:309066205-309067610	0.206	0.538	0.557	0.517	TraesCS2D02G256000	APC
Root	chr2D:349735467-349735675	0.331	0	0.967	0.12	TraesCS2D02G278600	APC
Root	chr2D:417184037-417185008	0.298	0.321	0.599	0.284	TraesCS2D02G324300	APC
Root	chr2D:417208141-417208355	0.193	0.208	0.731	0.059	TraesCS2D02G324400	APC
Root	chr2D:419031432-419032270	0.329	0.46	0.747	0.284	TraesCS2D02G325500	APC
Root	chr2D:424036704-424037363	0.418	0.338	0.509	0.171	TraesCS2D02G331800	APC
Root	chr2D:518026567-518026854	1.536	0.155	0.779	0.611	TraesCS2D02G402900	APC
Root	chr2D:518027307-518028681	0.752	0.389	0.765	0.346	TraesCS2D02G402900	APC
Root	chr2D:643737418-643737946	0.835	0.421	0.932	0.925	TraesCS2D02G583500	NPF
Root	chr2D:643738931-643739422	0.449	0.121	0.091	0.535	TraesCS2D02G583500	NPF
Root	chr3A:32423880-32424059	1.924	0.331	0	0	TraesCS3A02G056400	NPF
Root	chr3A:47851404-47851684	1.279	1.483	1.118	2.102	TraesCS3A02G077100	ASN
Root	chr3A:61311698-61311967	0.717	0.22	0.748	0.047	TraesCS3A02G096000	APC
Root	chr3A:61312835-61313062	0.546	0.327	0.788	0.221	TraesCS3A02G096000	APC
Root	chr3A:140805570-140806272	0.432	0.634	1.083	0.428	TraesCS3A02G151400	SLAH
Root	chr3A:419469647-419469830	0	0.567	0.367	0	TraesCS3A02G224100	APC
Root	chr3A:421724017-421724221	1.148	0.581	0.219	0.368	TraesCS3A02G225100	SLAH
Root	chr3A:421720669-421721479	0.391	0.275	0.966	0.278	TraesCS3A02G225100	SLAH
Root	chr3A:475305835-475306042	0	0	0	0	TraesCS3A02G254000	NRT2
Root	chr3A:475304752-475306216	0.188	0.061	0.519	0.026	TraesCS3A02G254000	NRT2
Root	chr3A:540660847-540661453	0.25	0.318	0.59	0.145	TraesCS3A02G304500	NPF
Root	chr3A:540654805-540655964	0.606	0.627	0.849	0.346	TraesCS3A02G304400	NPF
Root	chr3A:595962505-595962741	0.584	1.257	0.568	0.69	TraesCS3A02G346700	APC
Root	chr3A:621010442-621011970	0.388	0.301	0.746	0.328	TraesCS3A02G370300	APC
Root	chr3A:631728058-631729361	0.645	0.501	1.098	0.365	TraesCS3A02G381600	AMT
Root	chr3A:632288036-632289581	0.41	0.585	0.637	0.276	TraesCS3A02G382200	NPF
Root	chr3D:489645332-489645695	0.418	0.163	0.801	0.241	TraesCS3D02G376300	NPF
Root	chr3A:638325837-638326739	0.794	1.019	1.438	0.527	TraesCS3A02G390100	CLC
Root	chr3A:640699344-640699597	0.054	0.176	0.53	0.099	TraesCS3A02G392800	NPF
Root	chr3A:660435866-660436004	0.699	0.322	0.648	0.181	TraesCS3A02G418700	NPF
Root	chr3A:714367391-714367626	3.342	1.136	2.474	1.918	TraesCS3A02G484862	APC
Root	chr3A:714370479-714370682	0.95	0.877	0.441	2.714	TraesCS3A02G484862	APC
Root	chr3B:772723602-772724631	2.236	1.023	2.216	1.448	TraesCS3B02G532100	APC
Root	chr3B:772726263-772726891	2.896	1.369	3.026	2.472	TraesCS3B02G532100	APC
Root	chr3B:41800703-41803724	0.643	0.633	2.272	1.156	TraesCS3B02G069900	NPF
Root	chr3B:90119812-90119999	0	0	0	0.536	TraesCS3B02G120100	APC
Root	chr3B:166657176-166657583	0	0	1.483	0.461	TraesCS3B02G166500	APC
Root	chrUn:39535136-39535450	0.219	0.472	0.783	0.159	TraesCSU02G049700	APC
Root	chr3B:410774746-410775098	0.744	0.379	1.334	0.285	TraesCS3B02G254700	SLAH
Root	chr3B:536079097-536079276	0.231	0.249	0.625	0.28	TraesCS3B02G331100	AspAT
Root	chr3B:651426747-651426926	0	0.166	0.625	0.14	TraesCS3B02G414800	NPF
Root	chr3B:651501536-651502328	0.278	0.337	0.565	0.206	TraesCS3B02G414900	NPF
Root	chr3B:655438340-655438744	0.546	0.44	0.719	0.217	TraesCS3B02G418700	CLC
Root	chr3D:23732959-23733567	1.632	1.366	0.846	1.75	TraesCS3D02G056700	NPF
Root	chr3D:84581430-84581573	0	0	0	0.613	TraesCS3D02G126600	CLC
Root	chr3D:114205390-114205742	0.431	0.126	0.254	0.107	TraesCS3D02G149300	APC
Root	chr3D:114204884-114205168	0.049	0.052	0.787	0.044	TraesCS3D02G149300	APC
Root	chr3D:114206036-114206388	0.235	0.211	1.08	0.213	TraesCS3D02G149300	APC
Root	chr3D:129024428-129026091	0.282	0.419	0.645	0.241	TraesCS3D02G159600	SLAH
Root	chr3D:268049713-268050132	0	0.035	0.107	2.151	TraesCS3D02G206100	GDH
Root	chr3D:356624066-356624467	0	0	0	0	TraesCS3D02G254900	NRT2
Root	chr3D:356624025-356624789	0.09	0.039	0.263	0.049	TraesCS3D02G254900	NRT2
Root	chr3D:410996118-410996261	0.096	0.311	0	0.525	TraesCS3D02G297400	NPF
Root	chr3D:488118213-488119948	0.469	0.393	0.863	0.281	TraesCS3D02G374800	AMT
Root	chr3D:501077714-501078229	0.268	0.029	0.564	0.073	TraesCS3D02G385600	NPF
Root	chr3D:501086384-501086788	0.171	0.11	1.051	0.155	TraesCS3D02G385600	NPF
Root	chr3D:501162699-501164365	0.488	0.65	2.134	0.864	TraesCS3D02G385700	NPF
Root	chr3D:578674988-578675793	0.976	0.405	0.083	0.358	TraesCS3D02G479700	APC
Root	chr3D:578675103-578675470	0	0	0	0	TraesCS3D02G479700	APC
Root	chr3D:578925057-578925785	1.401	0.509	0.276	0.413	TraesCS3D02G480100	APC
Root	chr4A:12152069-12152567	0.636	0.834	0.359	1.383	TraesCS4A02G018500	APC
Root	chr4A:46220021-46220200	0.077	0.331	0.625	0.07	TraesCS4A02G055300	APC
Root	chr4A:75355370-75355617	1.395	1.501	0.091	1.318	TraesCS4A02G076000	NPF
Root	chr4A:133455460-133455598	0.899	0.107	0.486	0	TraesCS4A02G109900	ASN
Root	chr4A:590659537-590659716	0	0	0.625	0	TraesCS4A02G283900	NPF
Root	chr4A:593116279-593116417	0.699	0	0	0.091	TraesCS4A02G287900	NPF
Root	chr4A:628089603-628090405	1.357	0.721	1.951	0.734	TraesCS4A02G352900	AMT
Root	chr4A:651366045-651366948	1.572	1.248	2.996	0.887	TraesCS4A02G376700	NIA
Root	chr4A:651368626-651370208	2.587	1.978	4.211	1.955	TraesCS4A02G376700	NIA
Root	chr4A:709721777-709722047	2.296	2.197	0.662	1.437	TraesCS4A02G440700	NPF
Root	chr4A:709615835-709616300	3.052	3.635	2.26	4.039	TraesCS4A02G440600	NPF
Root	chr4A:709212505-709213185	2.269	2.726	1.677	4.492	TraesCS4A02G440300	NPF
Root	chr4B:631573778-631574241	2.797	2.402	0.531	3.272	TraesCS4B02G338600	NPF
Root	chr4B:659576755-659578635	1.664	1.806	0.595	2.444	TraesCS4B02G375800	NPF
Root	chr4B:660599032-660599329	1.299	1.098	0.075	2.361	TraesCS4B02G380000	NPF
Root	chr4D:63046262-63046445	0	0.162	0	0.068	TraesCS4D02G087900	NPF
Root	chr4D:63046176-63046397	0.125	0.067	0	0.057	TraesCS4D02G087900	NPF
Root	chr4D:338824411-338824719	0.939	0.241	0.218	0.122	TraesCS4D02G195100	ASN
Root	chr4D:393711134-393711429	0.047	0.05	0.606	0.212	TraesCS4D02G232900	NPF
Root	chr4D:493328414-493329436	0.715	0.827	1.072	0.453	TraesCS4D02G335100	NPF
Root	chr5A:34985977-34986454	1.444	1.772	1.359	1.969	TraesCS5A02G037900	NPF
Root	chr5A:230451687-230451830	0.193	0	0	0.613	TraesCS5A02G115100	APC
Root	chr5A:235243754-235244070	0.436	0.892	1.91	0.951	TraesCS5A02G115800	APC
Root	chr5A:281065303-281065722	0.099	0.106	0.534	0.12	TraesCS5A02G126900	APC
Root	chr5A:472108357-472108634	0.099	0.161	0	0.542	TraesCS5A02G256600	APC
Root	chr5A:525599659-525600471	0.373	0.402	0.936	0.401	TraesCS5A02G315000	APC
Root	chr5A:573602392-573602684	0.425	0.355	0.842	0.172	TraesCS5A02G375600	APC
Root	chr5A:584906304-584908012	0.936	1.215	1.374	0.579	TraesCS5A02G388100	AMT
Root	chr5A:599209742-599209934	1.22	0.927	0.116	1.565	TraesCS5A02G409600	NPF
Root	chr5A:649424978-649425121	0.193	0.622	0	0.613	TraesCS5A02G472600	APC
Root	chrUn:100088044-100088197	4.143	3.586	0.292	2.209	TraesCSU02G115500	NPF
Root	chr5A:672839930-672840398	3.445	3.453	1.242	3.451	TraesCS5A02G508500	NPF
Root	chr5B:865013-865703	1.258	0.688	0.518	1.288	TraesCS5B02G001100	NPF
Root	chr5B:866572-866786	2.511	1.455	0.627	2.223	TraesCS5B02G001100	NPF
Root	chr5B:214261233-214262070	0.609	0.726	1.496	0.479	TraesCS5B02G120800	APC
Root	chr5B:229642238-229642518	0	0.159	0.639	0.089	TraesCS5B02G126000	APC
Root	chr5B:547398798-547398995	1.469	0.301	0.113	1.144	TraesCS5B02G368800	APC
Root	chr5B:571530705-571531410	0.586	0.547	0.571	1.083	TraesCS5B02G393100	NPF
Root	chr5B:571536040-571536691	0.698	0.592	0.893	0.288	TraesCS5B02G393200	AMT
Root	chr5B:631888604-631889473	0.301	0.273	0.566	0.216	TraesCS5B02G457100	CLC
Root	chr5B:656806025-656806204	0.154	0.249	0.625	0.21	TraesCS5B02G485400	APC
Root	chr5B:656839943-656840291	0	0.128	0.578	0.036	TraesCS5B02G485500	APC
Root	chr5D:62299524-62299703	1.386	0.414	0	0.14	TraesCS5D02G067100	NPF
Root	chr5D:91345743-91345977	0.177	0.127	1.338	0.642	TraesCS5D02G085800	APC
Root	chrUn:115655900-115656397	0.444	0.418	1.17	0.302	TraesCSU02G134900	APC
Root	chr5D:464457497-464458624	0.465	0.303	0.516	0.189	TraesCS5D02G398200	AMT
Root	chr5D:540238479-540238617	2.995	1.719	3.402	1.542	TraesCS5D02G519400	AMT
Root	chr5D:540239663-540240789	1.273	0.869	2.78	0.723	TraesCS5D02G519400	AMT
Root	chr6A:8694985-8696084	0.514	0.378	1.058	0.444	TraesCS6A02G017500	NIA
Root	chr6A:9053298-9053481	0.151	0	0	0	TraesCS6A02G018600	AspAT
Root	chr6A:9053371-9053565	0	0.076	0	0.129	TraesCS6A02G018600	AspAT
Root	chr6A:15755793-15756967	1.291	0.644	0.762	0.757	TraesCS6A02G031000	NRT2
Root	chr6A:15780918-15782418	0	0	0	0	TraesCS6A02G031200	NRT2
Root	chr6A:15780918-15782816	0.261	0.07	0.2	0.145	TraesCS6A02G031200	NRT2
Root	chr6A:16378289-16378851	3.04	2.427	0.955	3.208	TraesCS6A02G032900	NRT2
Root	chr6D:15699521-15700554	3.388	2.297	0.325	3.091	TraesCS6D02G037900	NRT2
Root	chr6A:29780537-29780770	0.769	0.445	0	0.591	TraesCS6A02G056500	NPF
Root	chr6A:29781057-29781195	0.998	0.107	1.296	1.452	TraesCS6A02G056500	NPF
Root	chr6A:29784829-29786083	0.132	0.166	0.642	0.22	TraesCS6A02G056500	NPF
Root	chr6A:65798961-65799160	0	0	0.899	0	TraesCS6A02G098600	CLC
Root	chr6A:559523534-559523870	0.328	0.397	0.998	0.075	TraesCS6A02G326200	NIA
Root	chr6B:15132444-15132657	1.941	2.297	2.729	0.647	TraesCS6B02G024900	NIA
Root	chr6B:26589332-26589609	1.841	0.321	0.161	1.085	TraesCS6B02G044000	NRT2
Root	chr6B:26590416-26590826	1.68	0.362	0.491	0.733	TraesCS6B02G044000	NRT2
Root	chr6B:26591152-26592711	1.237	0.666	3.757	1.373	TraesCS6B02G044000	NRT2
Root	chr6B:26596268-26598900	0.796	0.563	2.837	1.389	TraesCS6B02G044100	NRT2
Root	chr6B:26619288-26619594	0	0	0.073	0.123	TraesCS6B02G044200	NRT2
Root	chr6B:26619321-26619643	0.214	0.092	0	0.311	TraesCS6B02G044200	NRT2
Root	chr6B:27684303-27684823	2.199	2.253	0.086	2.095	TraesCS6B02G046500	NRT2
Root	chr6B:27782324-27782467	6.745	3.733	0.156	4.903	TraesCS6B02G046600	NRT2
Root	chr6B:52084983-52085126	2.12	0.726	1.094	1.051	TraesCS6B02G076100	NPF
Root	chr6B:52086761-52087528	0.539	0.309	0.7	0.098	TraesCS6B02G076100	NPF
Root	chr6B:122291745-122292035	0.095	0.051	0.54	0.086	TraesCS6B02G126800	CLC
Root	chr6A:426965930-426966836	0.38	0.344	0.888	0.138	TraesCS6A02G226800	AMT
Root	chr6B:522639588-522639888	1.286	1.532	0.671	1.878	TraesCS6B02G290500	NPF
Root	chr6B:553412874-553413299	0.713	0.698	0.263	0.736	TraesCS6B02G309200	NPF
Root	chr6B:561712289-561712616	0.295	0.499	1.094	0.306	TraesCS6B02G314000	APC
Root	chr6D:1773763-1773904	1.661	0.21	0	0.533	TraesCS6D02G003200	APC
Root	chr6D:8155827-8156051	1.599	0.662	0.798	1.062	TraesCS6D02G020700	NIA
Root	chr6D:8150556-8151550	0.596	0.313	0.99	0.34	TraesCS6D02G020700	NIA
Root	chr6D:14619148-14620235	0.063	0.041	0.021	0	TraesCS6D02G035600	NRT2
Root	chr6D:14618820-14620188	0.363	0.098	0.637	0.146	TraesCS6D02G035600	NRT2
Root	chr6D:14633990-14634403	0.534	0.144	0	0.091	TraesCS6D02G035700	NRT2
Root	chr6D:14631617-14632942	1.404	1.119	2.767	1.011	TraesCS6D02G035700	NRT2
Root	chr6D:14633980-14634212	0	0	0	0	TraesCS6D02G035700	NRT2
Root	chr6D:15422477-15422628	4.836	5.303	2.517	5.141	TraesCS6D02G037300	NRT2
Root	chr6D:15713010-15713330	4.349	3.336	0.769	4.186	TraesCS6D02G038000	NRT2
Root	chr6D:15750932-15751315	3.598	1.665	0.759	2.517	TraesCS6D02G038100	NRT2
Root	chr6D:15748936-15749141	3.294	4.629	4.253	3.664	TraesCS6D02G038100	NRT2
Root	chr6D:15749746-15750028	2.883	3.365	1.11	3.951	TraesCS6D02G038100	NRT2
Root	chr6D:22177721-22178272	2.726	2.395	3.49	6.067	TraesCS6D02G047600	NPF
Root	chr6D:28248101-28248239	1.498	0.215	0.162	0.635	TraesCS6D02G060200	NPF
Root	chr6D:28248968-28249225	1.126	0.404	0.348	0.487	TraesCS6D02G060200	NPF
Root	chr6D:28243483-28243662	0.077	0.166	0.874	0.21	TraesCS6D02G060200	NPF
Root	chr6D:293802660-293803468	0.153	0.239	0.526	0.124	TraesCS6D02G208200	AMT
Root	chr6D:355136391-355138428	1.306	1.398	2.491	1.266	TraesCS6D02G251500	NPF
Root	chr6D:350204595-350204744	0.647	0.796	1.05	0.672	TraesCS6D02G247100	NPF
Root	chr6D:350064972-350065239	0	0.056	0.084	2.251	TraesCS6D02G247000	NPF
Root	chr6D:350065887-350066262	0	0	0.775	1.603	TraesCS6D02G247000	NPF
Root	chr6D:350080968-350081621	0	0.045	0	0.575	TraesCS6D02G247000	NPF
Root	chr6D:349031550-349032917	0.444	0.542	0.916	0.339	TraesCS6D02G246500	NPF
Root	chr6D:434259503-434259646	0.289	0.311	0	0.7	TraesCS6D02G331400	APC
Root	chr6D:434260412-434260562	0.367	0.989	0.149	0.835	TraesCS6D02G331400	APC
Root	chr6D:454000554-454000818	2.14	0.899	0.085	0.901	TraesCS6D02G363900	APC
Root	chr6D:453993109-453993540	1.151	1.101	0.207	0.901	TraesCS6D02G363900	APC
Root	chr7A:26105395-26105736	2.101	1.957	1.508	2.9	TraesCS7A02G054000	NPF
Root	chr7A:26242710-26243633	1.553	1.59	0.824	1.845	TraesCS7A02G054100	NPF
Root	chr7A:43184456-43185350	1.11	0.862	2.826	1.022	TraesCS7A02G078500	NIA
Root	chr7A:78468575-78469271	0.614	0.533	1.317	0.324	TraesCS7A02G121700	NPF
Root	chr7A:420842206-420842523	0.043	0.327	0.776	0.237	TraesCS7A02G301700	NPF
Root	chr7A:420843303-420843482	1.54	1.491	0.749	0.35	TraesCS7A02G301700	NPF
Root	chr7A:517520589-517520732	0.193	0	0	0.525	TraesCS7A02G353500	AspAT
Root	chr7A:522022850-522023041	0.721	0.388	0.585	0.59	TraesCS7A02G356600	APC
Root	chr7A:538948440-538949236	0.589	0.279	1.152	0.362	TraesCS7A02G365100	NPF
Root	chr7A:603025770-603026060	0.19	0.205	0.617	0.13	TraesCS7A02G412100	NPF
Root	chr7A:621908889-621909090	0.343	0.074	0	0.062	TraesCS7A02G428500	NRT2
Root	chr7A:621910685-621911119	0.063	0	0	0.029	TraesCS7A02G428500	NRT2
Root	chr7A:621911590-621912196	0	0	0	0	TraesCS7A02G428500	NRT2
Root	chr7A:621910713-621912222	0.082	0.069	0.252	0.05	TraesCS7A02G428500	NRT2
Root	chr7A:621908943-621909090	0	0	0	0	TraesCS7A02G428500	NRT2
Root	chr7A:657377318-657377615	0.557	0.15	0.452	0.084	TraesCS7A02G461200	NPF
Root	chr7A:709808781-709809397	1.253	0.867	0.544	4.329	TraesCS7A02G531000	NPF
Root	chr7A:709811008-709811981	2.096	1.783	0.896	7.283	TraesCS7A02G531000	NPF
Root	chr7A:709813174-709813770	2.774	1.841	0.975	9.81	TraesCS7A02G531000	NPF
Root	chr7B:17846997-17847657	1.232	0.719	1.118	1.043	TraesCS7B02G020300	NPF
Root	chr7B:17842360-17842601	0.515	0.431	1.577	0.312	TraesCS7B02G020300	NPF
Root	chr7B:106858565-106858787	0.372	0.334	0.504	0.169	TraesCS7B02G093200	APC
Root	chr7B:131942807-131943419	0.338	0.267	0.767	0.184	TraesCS7B02G113600	NPF
Root	chr7B:483229126-483229380	0.868	0.35	0.176	0.246	TraesCS7B02G262200	NPF
Root	chr7B:556683561-556683793	0.653	0	0.193	0	TraesCS7B02G311400	NPF
Root	chr7B:558363930-558364261	0.042	0.045	0.608	0	TraesCS7B02G312600	NPF
Root	chr7B:583922784-583923264	1.608	0.525	1.118	0.704	TraesCS7B02G328700	NRT2
Root	chr7B:624469153-624469386	1.064	0.509	1.056	0.376	TraesCS7B02G362700	NPF
Root	chr7D:43210074-43210331	1.93	0.808	2.349	1.072	TraesCS7D02G073700	NIA
Root	chr7D:43212467-43213403	1.605	1.125	2.866	0.963	TraesCS7D02G073700	NIA
Root	chr7D:74417767-74417920	0	0	0	0	TraesCS7D02G119800	NPF
Root	chr7D:74421596-74422216	0.156	0.048	0.144	0.04	TraesCS7D02G119800	NPF
Root	chr7D:74417767-74418252	0.17	0.122	0.461	0.052	TraesCS7D02G119800	NPF
Root	chr7D:74421727-74422460	0.094	0.142	0.122	0.12	TraesCS7D02G119800	NPF
Root	chr7D:74446587-74447426	0.608	0.371	0.986	0.448	TraesCS7D02G119900	NPF
Root	chr7D:167527608-167527921	0.308	0.189	0.571	0.16	TraesCS7D02G209200	NPF
Root	chr7D:374570682-374570991	0.312	0.24	1.085	0.081	TraesCS7D02G297000	NPF
Root	chr7D:489154415-489154553	0.799	0.43	0.324	0.272	TraesCS7D02G377800	NPF
Root	chr7A:603957540-603957765	0.612	0.659	0.894	0.278	TraesCS7A02G413200	NPF
Root	chr7D:540615758-540615984	2.561	0.722	0.594	1.274	TraesCS7D02G420900	NRT2
Root	chr7D:540618058-540618211	0	0	0	0	TraesCS7D02G420900	NRT2
Root	chr7D:540616768-540617945	0.035	0	0	0	TraesCS7D02G420900	NRT2
Root	chr7D:540616796-540618302	0.046	0.03	0.193	0.042	TraesCS7D02G420900	NRT2
Root	chr7D:568623208-568623526	0.043	0.187	0.562	0	TraesCS7D02G449400	NPF
Root	chr7D:617082617-617083090	1.69	0.658	0.142	1.509	TraesCS7D02G518900	NPF
Root	chr2A:768554358-768554997	0.561	0.603	2.099	0.882	TraesCS2A02G572100	NPF
Leaf	chr2A:382805367-382805673	0	0	0.18	0.615	TraesCS2A02G251800	TF
Leaf	chr2A:662902219-662902416	0.638	0.399	0.21	0	TraesCS2A02G407200	TF
Leaf	chr2A:746684743-746685083	0.082	0.694	0	0.043	TraesCS2A02G526300	TF
Leaf	chr6D:160428543-160428737	0.576	0.405	0.355	0.821	TraesCS6D02G173000	TF
Leaf	chr7D:449078061-449078200	1.206	0.566	0.396	0.104	TraesCS7D02G349300	TF
Leaf	chr1A:154699735-154699907	0.244	0.366	0.64	0.253	TraesCS1A02G127500	SLAH
Leaf	chr1A:154700712-154700884	0.65	0.732	0.48	0.168	TraesCS1A02G127500	SLAH
Leaf	chr1A:154701332-154701530	0.282	0.795	0.556	0.219	TraesCS1A02G127500	SLAH
Leaf	chr1A:449625465-449625917	0.278	0.766	0.274	0.288	TraesCS1A02G257400	NPF
Leaf	chr1A:513740149-513740362	0.656	1.256	0.258	0.068	TraesCS1A02G323400	NIR
Leaf	chr1A:580444167-580444476	0.226	0.611	0	0.047	TraesCS1A02G425400	APC
Leaf	chr1A:580444737-580444866	0.108	1.098	0	0	TraesCS1A02G425400	APC
Leaf	chr1B:471024816-471025053	0.236	0.664	0.581	0.183	TraesCS1B02G268200	NPF
Leaf	chr1D:349254870-349254999	0.433	0.976	0.107	0	TraesCS1D02G256700	NPF
Leaf	chr1D:349255492-349255621	0.325	1.342	0.213	0.225	TraesCS1D02G256700	NPF
Leaf	chr1D:349478062-349478614	0.405	1.14	0.324	0.472	TraesCS1D02G257100	NPF
Leaf	chr1D:374471201-374471426	0.807	0.489	0.734	0	TraesCS1D02G277600	APC
Leaf	chr3D:497721463-497722637	0.488	0.523	0.609	0.296	TraesCS3D02G381500	APC
Leaf	chr2A:419466763-419466892	0.108	0.976	0.32	0.112	TraesCS2A02G264500	NPF
Leaf	chr2A:572841405-572842153	0.056	0.568	0.552	0.329	TraesCS2A02G339100	APC
Leaf	chr2A:564104925-564105607	0.307	0.669	0.444	0.297	TraesCS2A02G331100	APC
Leaf	chr2A:740855625-740855814	0.074	0.666	0.073	0	TraesCS2A02G517500	CLC
Leaf	chr2D:639680500-639680712	0.659	1.262	0.519	1.298	TraesCS2D02G576000	NPF
Leaf	chr2B:383368047-383368185	0.101	0.912	0.299	0.105	TraesCS2B02G277600	NPF
Leaf	chr2B:488994892-488996134	0.214	0.697	0.41	0.338	TraesCS2B02G342900	APC
Leaf	chr2B:491054567-491054927	0.582	0.787	0.612	0.322	TraesCS2B02G344500	APC
Leaf	chr2B:492793255-492793718	0.483	0.68	0.654	0.282	TraesCS2B02G346100	NPF
Leaf	chr2B:742818982-742819111	0.325	0.61	0	0	TraesCS2B02G546000	CLC
Leaf	chr2B:798589509-798589723	0.392	1.103	0.514	0.135	TraesCS2B02G626100	NPF
Leaf	chr2D:417086476-417087620	0.269	0.564	0.577	0.38	TraesCS2D02G324000	APC
Leaf	chr2D:494657490-494657641	0.092	1.146	0	0.288	TraesCS2D02G388600	APC
Leaf	chr3A:140805703-140805855	0.092	0.828	0.181	0	TraesCS3A02G151400	SLAH
Leaf	chr3A:171551126-171551572	0.564	1.482	0.524	0.682	TraesCS3A02G167000	SLAH
Leaf	chr3A:343179844-343180026	1.304	0.259	0.151	0	TraesCS3A02G202500	GDH
Leaf	chr3A:475305106-475305235	0.325	0.61	0	0	TraesCS3A02G254000	NRT2
Leaf	chr3A:599385602-599385947	0.486	0.684	0.558	0.126	TraesCS3A02G350800	AMT
Leaf	chr3D:489645396-489645586	0.221	0.994	0.072	0.152	TraesCS3D02G376300	NPF
Leaf	chr3B:183082990-183083162	0.568	0.823	0.56	0.168	TraesCS3B02G178600	SLAH
Leaf	chr3B:603453003-603453191	0.297	1.088	0.146	0.462	TraesCS3B02G383400	AMT
Leaf	chr3B:603453496-603453692	0.143	0.722	0.07	0.148	TraesCS3B02G383400	AMT
Leaf	chr3B:650954104-650954444	0.78	0.972	0.688	0.298	TraesCS3B02G414300	AMT
Leaf	chr3B:650954829-650955141	0.537	0.908	0.573	0.186	TraesCS3B02G414300	AMT
Leaf	chr3B:655438621-655438769	0.283	1.276	0.558	0.587	TraesCS3B02G418700	CLC
Leaf	chr3B:680476516-680476932	1.276	1.626	1.058	0.453	TraesCS3B02G441100	APC
Leaf	chr3B:680676335-680676507	0.812	1.464	0.8	0.253	TraesCS3B02G441200	APC
Leaf	chr3B:680676826-680677140	0.534	0.651	0.701	0.092	TraesCS3B02G441200	APC
Leaf	chr3D:268050462-268050620	0.796	0.1	0.784	0.733	TraesCS3D02G206100	GDH
Leaf	chr3D:454155530-454155722	0.218	1.065	0.287	0.604	TraesCS3D02G340400	APC
Leaf	chr3D:454157365-454157528	0.171	1.158	0.169	0.089	TraesCS3D02G340400	APC
Leaf	chr3D:456597929-456598070	0.198	0.781	0.195	0.103	TraesCS3D02G344800	AMT
Leaf	chr3D:488118902-488119370	0.507	0.571	0.412	0.155	TraesCS3D02G374800	AMT
Leaf	chr4A:133455460-133455589	0.541	0.732	0.747	0.561	TraesCS4A02G109900	ASN
Leaf	chr4A:133457108-133457237	0.541	0.854	0.427	0.337	TraesCS4A02G109900	ASN
Leaf	chr4A:585443908-585444056	1.227	0.425	0	0.196	TraesCS4A02G277600	CLC
Leaf	chr4A:628088204-628088385	1.003	1.13	1.216	0.4	TraesCS4A02G352900	AMT
Leaf	chr4B:40871515-40871719	0.342	0.077	0.742	0.284	TraesCS4B02G052200	NPF
Leaf	chr4B:93408005-93408190	0.302	0.85	0.223	0.391	TraesCS4B02G090800	NPF
Leaf	chr4B:93408596-93408972	0.409	0.795	0.329	0.154	TraesCS4B02G090800	NPF
Leaf	chr4B:106492941-106493117	0.238	1.341	0.156	0.412	TraesCS4B02G100800	APC
Leaf	chr4D:338824192-338824676	0.173	0.618	0.142	0.09	TraesCS4D02G195100	ASN
Leaf	chr4D:386436347-386436925	0.677	1.47	0.833	0.652	TraesCS4D02G227200	APC
Leaf	chr4D:386437259-386437509	0.894	1.51	0.936	0.927	TraesCS4D02G227200	APC
Leaf	chr5A:472108376-472108565	0	0.166	0.146	0.613	TraesCS5A02G256600	APC
Leaf	chr5A:649425337-649425667	0.296	0.763	0.25	0.263	TraesCS5A02G472600	APC
Leaf	chr5B:690240163-690240591	0.196	0.919	0.579	0.575	TraesCS5B02G533500	APC
Leaf	chr5D:369579670-369579801	0.746	0.12	0	0	TraesCS5D02G265100	APC
Leaf	chr5D:480466210-480466378	0.333	1.03	0	0.086	TraesCS5D02G419200	NPF
Leaf	chr6A:493839453-493839622	0.083	0.745	0	0	TraesCS6A02G267700	NPF
Leaf	chr6A:493843492-493843702	0.133	0.749	0.131	0.069	TraesCS6A02G267700	NPF
Leaf	chr6A:520587937-520588714	0.306	0.506	0.336	0.168	TraesCS6A02G288200	APC
Leaf	chr6B:529773172-529773654	0.377	0.783	0.828	0.301	TraesCS6B02G295000	NPF
Leaf	chr6B:529890244-529890882	0.438	1.282	0.927	0.454	TraesCS6B02G295100	NPF
Leaf	chr6B:657001831-657001971	0	0.674	0	0.103	TraesCS6B02G382000	APC
Leaf	chr6D:293802098-293802821	0.637	0.849	0.609	0.321	TraesCS6D02G208200	AMT
Leaf	chr6D:434260239-434260723	0.375	0.878	0.512	0.329	TraesCS6D02G331400	APC
Leaf	chr7A:169023171-169023300	0.325	0.854	0.213	0	TraesCS7A02G206400	NPF
Leaf	chr7B:369414843-369414974	0.64	0	0.21	0	TraesCS7B02G201900	NPF
Leaf	chr7B:497966669-497966798	0.108	1.829	0.213	0	TraesCS7B02G271151	APC
Leaf	chr7B:503373283-503373462	0.234	0.703	0.154	0.081	TraesCS7B02G274100	AspAT
Leaf	chr7D:264773888-264774077	0	0	0.073	0.536	TraesCS7D02G276400	APC
Leaf	chr7D:617083000-617083661	0.634	1.523	0.083	0.175	TraesCS7D02G518900	NPF
Seed	chr1A:445509714-445509928	0	0.719	0.07	0.121	TraesCS1A02G253600	TF
Seed	chr1A:445526170-445526369	0.152	0	0.151	0.522	TraesCS1A02G253600	TF
Seed	chr1B:465384419-465385344	0.408	1.739	0.503	0.645	TraesCS1B02G264600	TF
Seed	chr1B:480444888-480445254	0.165	1.215	0.369	0.532	TraesCS1B02G273300	TF
Seed	chr1B:480439767-480440098	1.094	0	1.86	1.176	TraesCS1B02G273300	TF
Seed	chr1D:100652009-100653574	0.309	1.705	0.547	0.58	TraesCS1D02G107600	TF
Seed	chr1D:345406438-345407378	0.128	0.546	0.096	0.055	TraesCS1D02G253200	TF
Seed	chr1D:356930403-356930635	1.106	0	2.071	0.671	TraesCS1D02G262700	TF
Seed	chr2A:163097311-163098241	0.227	1.104	0.339	0.544	TraesCS2A02G194500	TF
Seed	chr2A:382805440-382805649	0	0	0.503	0.994	TraesCS2A02G251800	TF
Seed	chr2A:420223114-420223412	0.101	0.517	0.101	0.218	TraesCS2A02G264800	TF
Seed	chr2A:662902174-662902395	0.137	0.929	1.087	0.529	TraesCS2A02G407200	TF
Seed	chr2D:138515993-138517002	0.15	0.712	0.238	0.27	TraesCS2D02G193400	TF
Seed	chr2D:315116759-315117044	0.212	0.84	0.421	0.455	TraesCS2D02G259200	TF
Seed	chr3D:250919956-250920117	0	0.213	0.186	0.645	TraesCS3D02G203000	TF
Seed	chr4B:75778226-75778624	0.152	1.547	0.49	0.75	TraesCS4B02G078800	TF
Seed	chr5A:77326986-77327700	0	0.048	0	0	TraesCS5A02G068900	TF
Seed	chr5A:77326997-77327726	0.021	0	0	0.018	TraesCS5A02G068900	TF
Seed	chr5A:573039725-573039870	0.312	0.472	0.725	0.269	TraesCS5A02G375000	TF
Seed	chr5B:432322543-432323270	0.208	0.847	0.289	0.5	TraesCS5B02G249800	TF
Seed	chr5B:582427053-582427474	0.573	0.041	0.357	0.277	TraesCS5B02G406300	TF
Seed	chr5D:81150686-81151247	0.134	0.732	0.187	0.231	TraesCS5D02G081000	TF
Seed	chr5D:365991680-365992141	0	0	0	0	TraesCS5D02G259700	TF
Seed	chr5D:365991640-365992273	0.024	0.081	0	0.103	TraesCS5D02G259700	TF
Seed	chr5D:475209406-475209647	0.125	0.852	1.308	0.808	TraesCS5D02G411800	TF
Seed	chr6A:191246421-191246754	0.136	0.257	0.676	0.195	TraesCS6A02G175800	TF
Seed	chr6D:151948336-151948580	0.804	0	0.185	0.319	TraesCS6D02G167800	TF
Seed	chr6A:567933477-567933702	0.805	0.912	0.334	0.865	TraesCS6A02G335400	TF
Seed	chr6A:567934282-567934538	0.825	0	1.407	0.203	TraesCS6A02G335400	TF
Seed	chr6A:567938622-567938939	0.286	1.673	0.426	1.269	TraesCS6A02G335400	TF
Seed	chr6A:567939636-567940255	0.366	1.078	0.437	1.153	TraesCS6A02G335400	TF
Seed	chr6B:638828165-638828845	0.399	0.277	0.508	0.191	TraesCS6B02G366100	TF
Seed	chr6B:638829326-638829668	0.662	0	0.922	0.114	TraesCS6B02G366100	TF
Seed	chr6D:423752843-423753574	0.557	0.328	0.452	0.391	TraesCS6D02G315300	TF
Seed	chr6D:423751895-423752344	0.471	0	0.903	0.145	TraesCS6D02G315300	TF
Seed	chr7D:90848686-90848862	0.086	0.583	0	0.147	TraesCS7D02G142600	TF
Seed	chr7A:537661753-537662684	1.102	0.092	1.758	0.878	TraesCS7A02G363100	TF
Seed	chr7D:449078062-449078508	0.203	1.343	0.841	0.669	TraesCS7D02G349300	TF
Seed	chr7D:462282001-462282577	1.834	0.03	2.58	1.532	TraesCS7D02G359900	TF
Seed	chr7D:484732751-484733615	0.017	0.04	0	0.015	TraesCS7D02G374400	TF
Seed	chr7D:484732861-484733623	0	0	0	0	TraesCS7D02G374400	TF
Seed	chr1A:14518240-14518385	1.977	0	8.386	1.611	TraesCS1A02G031300	NPF
Seed	chr1A:60736704-60737522	2.822	3.597	1.45	1.888	TraesCS1A02G077800	APC
Seed	chr1A:449624010-449626057	0.428	2.374	0.638	1.027	TraesCS1A02G257400	NPF
Seed	chr1A:449621923-449622651	0	0	0	0	TraesCS1A02G257400	NPF
Seed	chr1A:449621750-449623225	0.153	0.441	0.234	0.343	TraesCS1A02G257400	NPF
Seed	chr1A:449812165-449813774	0.385	1.595	0.541	0.895	TraesCS1A02G257800	NPF
Seed	chr1A:460279306-460279512	3.443	0	4.227	2.016	TraesCS1A02G264500	APC
Seed	chr1A:513739675-513740320	0.281	1.247	0.815	0.584	TraesCS1A02G323400	NIR
Seed	chr1A:578931743-578932051	1.421	0.444	3.899	2.191	TraesCS1A02G423900	SLAH
Seed	chrUn:1924255-1924705	1.375	0.836	3.269	2.567	TraesCSU02G001500	SLAH
Seed	chr1A:580444441-580445037	0.127	1.148	0.529	1.219	TraesCS1A02G425400	APC
Seed	chr1B:297294422-297294910	0.031	0.841	0.215	0.399	TraesCS1B02G168000	NPF
Seed	chr1B:297296721-297296987	0	0	0	0	TraesCS1B02G168000	NPF
Seed	chr1B:297297842-297298018	0.171	1.264	0.085	0.147	TraesCS1B02G168000	NPF
Seed	chr1B:297299766-297300111	0.044	0.545	0.044	0.226	TraesCS1B02G168000	NPF
Seed	chr1B:297296700-297296925	0	0	0	0.058	TraesCS1B02G168000	NPF
Seed	chr1B:297299502-297299786	0.053	0.361	0.159	0.503	TraesCS1B02G168000	NPF
Seed	chr1B:297458584-297459388	0.113	0.553	0.187	0.21	TraesCS1B02G168100	NPF
Seed	chr1B:385658005-385659056	0.029	0.407	0.043	0.123	TraesCS1B02G212400	NPF
Seed	chr1B:385658233-385658678	0	0	0	0	TraesCS1B02G212400	NPF
Seed	chr1B:403542970-403543557	0.488	2.798	1.125	2.321	TraesCS1B02G224900	NPF
Seed	chr1B:403581156-403582205	0.532	2.821	1.002	1.596	TraesCS1B02G225000	NPF
Seed	chr1B:470911626-470913582	0.285	1.242	0.484	0.836	TraesCS1B02G267900	NPF
Seed	chr1B:471024801-471026274	0.246	0.929	0.367	0.67	TraesCS1B02G268200	NPF
Seed	chr1B:482695379-482695561	2.156	0.094	2.64	1.284	TraesCS1B02G275200	APC
Seed	chr1B:488414602-488414786	0.82	0.093	0	0.141	TraesCS1B02G279900	NPF
Seed	chr1B:499470330-499470631	1.504	2.444	1.147	1.725	TraesCS1B02G287300	APC
Seed	chr1B:499468217-499469066	0.782	4.131	1.238	1.957	TraesCS1B02G287300	APC
Seed	chr1B:622366410-622366916	0.686	3.144	1.038	2.154	TraesCS1B02G388600	SLAH
Seed	chr1B:635919874-635920056	0.249	0.658	0.412	0.143	TraesCS1B02G408200	ASN
Seed	chr1D:16502146-16502357	0	0	0	0	TraesCS1D02G035700	NRT2
Seed	chr1D:16501989-16502444	0.531	0.602	1.056	0.456	TraesCS1D02G035700	NRT2
Seed	chr1D:62598987-62601395	1.542	3.24	1.484	1.514	TraesCS1D02G079900	APC
Seed	chr1D:203431796-203431972	0.086	0.68	0.085	0.369	TraesCS1D02G147200	NPF
Seed	chr1D:203471740-203473197	0.145	0.528	0.155	0.347	TraesCS1D02G147400	NPF
Seed	chr1D:284047621-284047917	0.153	0	0.507	0.614	TraesCS1D02G201200	NPF
Seed	chr1D:349254083-349255903	0.332	1.636	0.445	0.813	TraesCS1D02G256700	NPF
Seed	chr1D:365052405-365052566	0	0.106	0.186	0.564	TraesCS1D02G269500	NPF
Seed	chr1D:365086410-365087043	0.143	0.892	0.569	0.492	TraesCS1D02G269700	NPF
Seed	chr1D:394674180-394674615	0.624	0.039	0.483	0.149	TraesCS1D02G296600	AMT
Seed	chr2A:526099416-526100200	0.231	1.157	0.306	0.844	TraesCS2A02G305900	APC
Seed	chr2A:572841031-572842295	0.096	0.744	0.831	1.602	TraesCS2A02G339100	APC
Seed	chr2A:570930080-570930340	0	0	0	0	TraesCS2A02G337400	APC
Seed	chr2A:570930109-570930338	0	0	0	0	TraesCS2A02G337400	APC
Seed	chr2A:587406040-587406201	0	0.531	0.28	0.564	TraesCS2A02G348600	APC
Seed	chr2A:608870969-608872545	0.364	1.835	0.476	0.692	TraesCS2A02G365000	AMT
Seed	chr2A:661712240-661713562	0.308	1.553	0.613	1.07	TraesCS2A02G406000	APC
Seed	chr2A:661711007-661711209	0.523	2.456	1.486	1.413	TraesCS2A02G406000	APC
Seed	chr2A:693428154-693429672	0.517	2.795	0.92	1.582	TraesCS2A02G443600	NPF
Seed	chr2A:729188827-729190507	0.081	0.336	0.009	0.093	TraesCS2A02G499800	APC
Seed	chr2A:729189161-729190456	0	0	0	0	TraesCS2A02G499800	APC
Seed	chr2A:768523671-768523883	1.21	1.856	0.071	0.061	TraesCS2A02G571900	NPF
Seed	chr2A:768526357-768526680	1.448	0.265	2.324	1.487	TraesCS2A02G571900	NPF
Seed	chr2A:765053026-765054162	0.398	2.018	1.216	2.102	TraesCS2A02G565600	NPF
Seed	chr2B:28096045-28096224	0.169	0	0.335	0	TraesCS2B02G057600	NPF
Seed	chr2B:28095981-28096203	0	0	0.406	0.234	TraesCS2B02G057600	NPF
Seed	chr2B:383364116-383364348	0	1.032	0.647	0.727	TraesCS2B02G277600	NPF
Seed	chr2B:465832142-465832494	0	0	0.64	0.258	TraesCS2B02G326200	NPF
Seed	chr2B:489016111-489016287	0.171	1.944	0.426	1.032	TraesCS2B02G343200	APC
Seed	chr2B:547057045-547058393	0.19	0.8	0.278	0.433	TraesCS2B02G383600	AMT
Seed	chr2B:742818758-742819008	0	0.753	0.36	0.571	TraesCS2B02G546000	CLC
Seed	chr2B:742821859-742822366	0.119	0.405	0.444	0.512	TraesCS2B02G546000	CLC
Seed	chr2B:798746756-798747116	0.335	1.378	0.042	0	TraesCS2B02G626700	NPF
Seed	chr2B:798581975-798582863	0.272	1.117	1.623	2.66	TraesCS2B02G626000	NPF
Seed	chrUn:24267426-24267883	2.741	0.112	3.219	1.676	TraesCSU02G023100	APC
Seed	chrUn:24263166-24263399	2.008	2.643	1.933	1.448	TraesCSU02G023100	APC
Seed	chr2D:315492854-315493121	0.283	1.217	0.45	0.68	TraesCS2D02G259400	NPF
Seed	chr2D:349734122-349734517	0.153	1.169	0.418	0.559	TraesCS2D02G278600	APC
Seed	chr2D:349735484-349735715	0.261	1.037	0.52	0.506	TraesCS2D02G278600	APC
Seed	chr2D:394119318-394120070	0.14	0.591	0.26	0.5	TraesCS2D02G307400	NPF
Seed	chr2D:417085990-417087722	0.444	1.936	0.633	1.184	TraesCS2D02G324000	APC
Seed	chr2D:417183826-417184913	0.014	0.063	0.014	0.06	TraesCS2D02G324300	APC
Seed	chr2D:417183917-417184912	0	0	0	0	TraesCS2D02G324300	APC
Seed	chr2D:424036661-424037232	0.106	0.599	0.368	0.318	TraesCS2D02G331800	APC
Seed	chr2D:468856097-468857619	0.268	1.191	0.325	0.605	TraesCS2D02G362900	AMT
Seed	chr2D:553251869-553253302	0.358	1.779	0.524	0.779	TraesCS2D02G442700	NPF
Seed	chr2D:608920498-608920692	0.233	0.441	0.696	0.268	TraesCS2D02G519000	CLC
Seed	chr3A:110070081-110070408	0.092	0.732	0.23	0.198	TraesCS3A02G133100	APC
Seed	chr3A:171549158-171549840	0.553	3.963	1.167	1.96	TraesCS3A02G167000	SLAH
Seed	chr3A:475304689-475306168	0	0.012	0	0.018	TraesCS3A02G254000	NRT2
Seed	chr3A:475304687-475306135	0	0	0	0	TraesCS3A02G254000	NRT2
Seed	chr3A:540655016-540655897	0.137	0.718	0.358	0.53	TraesCS3A02G304400	NPF
Seed	chr3A:595966278-595966931	0.393	2.279	0.736	1.371	TraesCS3A02G346700	APC
Seed	chr3A:599385224-599386276	0	0	0	0	TraesCS3A02G350800	AMT
Seed	chr3A:599385212-599386397	0.013	0.014	0	0.044	TraesCS3A02G350800	AMT
Seed	chr3A:632287987-632289557	0.269	1.046	0.344	0.769	TraesCS3A02G382200	NPF
Seed	chr3D:489645184-489646095	0.331	1.972	0.527	1.026	TraesCS3D02G376300	NPF
Seed	chr3A:636860131-636861324	0.379	1.879	0.793	1.164	TraesCS3A02G388000	APC
Seed	chr3A:640679171-640679748	0	0.059	0	0	TraesCS3A02G392800	NPF
Seed	chr3A:640699079-640699604	0	0.098	0	0	TraesCS3A02G392800	NPF
Seed	chr3A:640679186-640679717	0	0	0	0	TraesCS3A02G392800	NPF
Seed	chr3A:640699083-640699563	0	0	0	0	TraesCS3A02G392800	NPF
Seed	chr3A:640703155-640703411	0.413	1.136	0.059	0.811	TraesCS3A02G392800	NPF
Seed	chr3A:660435226-660436466	0.158	0.635	0.375	0.429	TraesCS3A02G418700	NPF
Seed	chr3A:714415706-714415885	2.108	0	2.348	1.958	TraesCS3A02G484900	APC
Seed	chr3B:14368058-14368318	1.799	1.579	0	0	TraesCS3B02G031700	APC
Seed	chr3B:90127329-90127474	0.208	0	0.621	0	TraesCS3B02G120100	APC
Seed	chr3B:183076179-183076358	0.59	0	0.084	0.29	TraesCS3B02G178600	SLAH
Seed	chr3B:183082572-183084464	0.167	0.597	0.254	0.377	TraesCS3B02G178600	SLAH
Seed	chr3B:227665268-227665938	0.18	1.2	0.605	0.988	TraesCS3B02G199200	SLAH
Seed	chr3B:410774386-410775467	0.195	1.329	0.264	0.54	TraesCS3B02G254700	SLAH
Seed	chr3B:457634097-457635744	0.055	0.447	0.1	0.189	TraesCS3B02G285900	NRT2
Seed	chr3B:457634064-457634354	0	0	0	0	TraesCS3B02G285900	NRT2
Seed	chr3B:603452671-603453638	0.25	1.185	0.357	0.429	TraesCS3B02G383400	AMT
Seed	chr3B:650953383-650955224	0.393	1.626	0.718	1.128	TraesCS3B02G414300	AMT
Seed	chr3B:651500619-651502281	0.345	0.937	0.361	0.859	TraesCS3B02G414900	NPF
Seed	chr3B:651568825-651569754	0.227	0.81	0.178	0.461	TraesCS3B02G415300	NPF
Seed	chr3B:655437945-655438772	0.31	0.786	0.29	0.894	TraesCS3B02G418700	CLC
Seed	chr3B:662550917-662551621	0.15	0.899	0.299	0.442	TraesCS3B02G424700	NPF
Seed	chr3B:662556229-662556944	0.232	1.818	0.483	0.944	TraesCS3B02G424700	NPF
Seed	chr3B:662796487-662796950	0.261	1.293	0.259	0.897	TraesCS3B02G424800	NPF
Seed	chr3B:695506610-695507399	0.019	0.13	0.019	0.033	TraesCS3B02G454000	NPF
Seed	chr3B:695506615-695507280	0	0	0	0	TraesCS3B02G454000	NPF
Seed	chr3D:114205161-114206616	0.301	1.141	0.361	0.651	TraesCS3D02G149300	APC
Seed	chr3D:129024444-129025080	0.119	0.699	0.047	0.245	TraesCS3D02G159600	SLAH
Seed	chr3D:129025641-129026368	0.042	0.094	0.021	0	TraesCS3D02G159600	SLAH
Seed	chr3D:129025759-129026537	0.039	0.11	0.039	0.1	TraesCS3D02G159600	SLAH
Seed	chr3D:268049781-268050056	0.219	0	2.347	0.944	TraesCS3D02G206100	GDH
Seed	chr3D:356622985-356624863	0.137	1.066	0.328	0.594	TraesCS3D02G254900	NRT2
Seed	chr3D:356622944-356623203	0	0.066	0	0	TraesCS3D02G254900	NRT2
Seed	chr3D:456597800-456598653	0.265	1.183	0.37	0.502	TraesCS3D02G344800	AMT
Seed	chr3D:488118216-488119968	0.25	1.562	0.497	0.963	TraesCS3D02G374800	AMT
Seed	chr3D:488873133-488873438	0.396	2.075	0.049	1.234	TraesCS3D02G375500	NPF
Seed	chr3D:488888639-488889189	0.247	1.431	0.328	0.684	TraesCS3D02G375600	NPF
Seed	chr3D:489618383-489620071	0.232	0.628	0.24	0.607	TraesCS3D02G376200	NPF
Seed	chr3D:501086139-501086901	0.277	1.235	0.473	0.664	TraesCS3D02G385600	NPF
Seed	chr3D:501077510-501078305	0.228	0.904	0.151	0.31	TraesCS3D02G385600	NPF
Seed	chr3D:578677266-578677989	1.92	1.207	2.118	2.531	TraesCS3D02G479700	APC
Seed	chr3D:578675276-578675874	1.161	0.601	2.059	1.085	TraesCS3D02G479700	APC
Seed	chr4A:11985964-11986617	1.756	2.017	2.483	2.802	TraesCS4A02G018400	APC
Seed	chr4A:67892146-67894949	0.834	0.8	0.873	1.315	TraesCS4A02G070500	APC
Seed	chr4A:133457106-133457547	0.274	1.164	0.136	0.441	TraesCS4A02G109900	ASN
Seed	chr4A:590656056-590656721	0.045	0.154	0	0.039	TraesCS4A02G283900	NPF
Seed	chr4A:590656218-590656848	0.072	0.163	0.048	0.124	TraesCS4A02G283900	NPF
Seed	chr4A:709721656-709722028	0.811	0.092	1.695	0.593	TraesCS4A02G440700	NPF
Seed	chr4A:709212639-709213284	2.106	0.424	3.864	2.877	TraesCS4A02G440300	NPF
Seed	chr4B:40871603-40871926	0.047	0.53	0.139	0.241	TraesCS4B02G052200	NPF
Seed	chr4B:93414169-93414606	0.794	0	0.206	0.059	TraesCS4B02G090800	NPF
Seed	chr4B:106491335-106493190	0.187	0.941	0.445	0.756	TraesCS4B02G100800	APC
Seed	chr4B:417737560-417737817	0.176	0.932	0.467	0.606	TraesCS4B02G194400	ASN
Seed	chr4B:417738427-417739302	0.103	0.567	0.103	0.252	TraesCS4B02G194400	ASN
Seed	chr4B:473570053-473572985	0.273	0.379	0.353	0.522	TraesCS4B02G226500	APC
Seed	chr4B:642923082-642923288	2.051	2.574	1.968	1.638	TraesCS4B02G350000	APC
Seed	chr4B:642927921-642928975	0	0	0	0	TraesCS4B02G350000	APC
Seed	chr4B:642927853-642929049	0.025	0.129	0.113	0.163	TraesCS4B02G350000	APC
Seed	chr4B:659576855-659577747	1.387	0.844	2.036	1.411	TraesCS4B02G375800	NPF
Seed	chr4D:11863168-11863745	0.183	0.652	0.39	0.81	TraesCS4D02G026800	NPF
Seed	chr4D:74158612-74160520	0.388	1.596	0.582	1.068	TraesCS4D02G097400	APC
Seed	chr4D:378505650-378506283	0.334	1.216	0.379	0.41	TraesCS4D02G221500	APC
Seed	chr4D:393711137-393711705	0.266	1.084	0.264	0.503	TraesCS4D02G232900	NPF
Seed	chr4D:493334662-493334841	1.77	0	2.768	2.103	TraesCS4D02G335100	NPF
Seed	chr5A:235243616-235244110	0.183	1.004	0.304	0.683	TraesCS5A02G115800	APC
Seed	chr5A:235245535-235245723	0.321	1.183	0.24	0.207	TraesCS5A02G115800	APC
Seed	chr5A:281065333-281065771	0	0	0	0	TraesCS5A02G126900	APC
Seed	chr5A:281065313-281067001	0.089	0.345	0.089	0.223	TraesCS5A02G126900	APC
Seed	chr5A:525602133-525602612	0.536	2.179	1.128	1.355	TraesCS5A02G315000	APC
Seed	chr5A:599207395-599208199	0.657	3.894	0.99	2.228	TraesCS5A02G409600	NPF
Seed	chr5A:649402595-649403027	0.384	0.99	0.243	0.511	TraesCS5A02G472500	APC
Seed	chr5A:649425375-649425780	0.708	0.127	0.63	0.705	TraesCS5A02G472600	APC
Seed	chr5A:656220975-656222859	0.36	1.516	0.542	0.703	TraesCS5A02G485000	NPF
Seed	chr5A:656493997-656495821	0.546	2.57	1.004	1.523	TraesCS5A02G485200	NPF
Seed	chr5A:672840078-672840288	2.874	0.652	3.074	3.028	TraesCS5A02G508500	NPF
Seed	chr5A:693640161-693640340	2.023	0.287	6.793	2.755	TraesCS5A02G537100	NPF
Seed	chr5B:866647-866792	1.145	0	1.864	0.448	TraesCS5B02G001100	NPF
Seed	chr5B:197192440-197193315	0.414	1.33	0.566	0.905	TraesCS5B02G116100	APC
Seed	chr5B:197200965-197201545	0.364	1.888	0.802	1.186	TraesCS5B02G116100	APC
Seed	chr5B:214261283-214262084	0.527	2.349	0.656	1.102	TraesCS5B02G120800	APC
Seed	chr5B:281105908-281106793	0.153	0.522	0.136	0.455	TraesCS5B02G152000	NPF
Seed	chr5B:426558430-426559028	0.328	1.545	0.351	1.063	TraesCS5B02G245300	NPF
Seed	chr5B:547396653-547396829	0.429	0.972	0.597	0.959	TraesCS5B02G368800	APC
Seed	chr5B:571530476-571531345	0.469	0.63	0.985	0.418	TraesCS5B02G393100	NPF
Seed	chr5B:571535498-571536899	0.334	2.442	0.546	1.065	TraesCS5B02G393200	AMT
Seed	chr5B:656805270-656806323	0.072	0.634	0.228	0.505	TraesCS5B02G485400	APC
Seed	chr5B:656838974-656840188	0.162	0.536	0.284	0.406	TraesCS5B02G485500	APC
Seed	chr5D:62299460-62299610	1.107	0	1.401	0	TraesCS5D02G067100	NPF
Seed	chrUn:115653115-115653416	0.702	0.512	0.199	0.474	TraesCSU02G134900	APC
Seed	chr5D:413286571-413287851	0.424	2.339	0.692	1.105	TraesCS5D02G321300	APC
Seed	chr5D:413283981-413284424	0.409	2.549	0.508	0.996	TraesCS5D02G321300	APC
Seed	chr5D:454204173-454205496	0.274	1.578	0.42	0.736	TraesCS5D02G385125	APC
Seed	chr5D:528294787-528296173	0.555	3.074	0.986	1.629	TraesCS5D02G498500	NPF
Seed	chr5D:528415503-528416927	0	0	0	0	TraesCS5D02G498700	NPF
Seed	chr5D:528415066-528417032	0.1	0.183	0.13	0.158	TraesCS5D02G498700	NPF
Seed	chr5D:540241369-540242385	0.386	1.987	0.355	1.316	TraesCS5D02G519400	AMT
Seed	chr5D:547063972-547064330	0	0	0	0	TraesCS5D02G531700	APC
Seed	chr5D:547063926-547064369	0	0.116	0.068	0.088	TraesCS5D02G531700	APC
Seed	chr6A:15758046-15758432	1.095	0.222	0.583	0.471	TraesCS6A02G031000	NRT2
Seed	chr6D:15699734-15700010	2.187	0.124	4.351	1.599	TraesCS6D02G037900	NRT2
Seed	chr6A:486548823-486550227	0.817	4.143	1.433	2.616	TraesCS6A02G263500	NPF
Seed	chr6A:493839368-493839638	0.894	0	0	0	TraesCS6A02G267700	NPF
Seed	chr6A:494044081-494044601	0.522	0.033	0.433	0.15	TraesCS6A02G267800	NPF
Seed	chr6A:494047268-494048105	0.18	0.654	0.287	0.465	TraesCS6A02G267800	NPF
Seed	chr6A:508716054-508716646	0.382	0.058	1.04	0.263	TraesCS6A02G280200	NPF
Seed	chr6A:580321779-580322418	0.236	0.562	0.141	0.284	TraesCS6A02G348300	APC
Seed	chr6A:580539394-580539983	0.128	0.523	0.178	0.286	TraesCS6A02G348400	APC
Seed	chr6B:15933924-15934197	0.111	0.752	0.33	0.048	TraesCS6B02G026900	AspAT
Seed	chr6B:26619325-26619509	0	0	0	0	TraesCS6B02G044200	NRT2
Seed	chr6B:26619286-26619635	0.519	0	0.645	0.372	TraesCS6B02G044200	NRT2
Seed	chr6B:27782350-27782541	3.081	0.09	4.873	1.155	TraesCS6B02G046600	NRT2
Seed	chr6B:238153012-238153383	0.041	0.046	0.162	0.525	TraesCS6B02G198900	APC
Seed	chr6A:426965986-426967561	0.498	2.911	0.505	1.137	TraesCS6A02G226800	AMT
Seed	chr6B:529887575-529888538	0.329	2.132	0.062	0.323	TraesCS6B02G295100	NPF
Seed	chr6D:422080119-422081290	0.142	0.526	0.346	0.587	TraesCS6D02G313100	NIR
Seed	chr6D:14634001-14634328	1.338	0.052	2.204	0.953	TraesCS6D02G035700	NRT2
Seed	chr6D:14682382-14682599	1.321	0.079	0	0	TraesCS6D02G035900	NRT2
Seed	chr6D:15421022-15421201	3.456	1.147	3.774	4.568	TraesCS6D02G037300	NRT2
Seed	chr6D:15422433-15422615	1.741	0.188	4.372	3.209	TraesCS6D02G037300	NRT2
Seed	chr6D:15713034-15713221	0	0	0	0	TraesCS6D02G038000	NRT2
Seed	chr6D:15711197-15711529	3.863	6.081	2.894	5.551	TraesCS6D02G038000	NRT2
Seed	chr6D:15712497-15713324	0.949	0.103	1.852	0.471	TraesCS6D02G038000	NRT2
Seed	chr6D:15748884-15749220	1.617	4.481	1.742	2.665	TraesCS6D02G038100	NRT2
Seed	chr6D:22176633-22177127	0.641	0.035	3.464	1.261	TraesCS6D02G047600	NPF
Seed	chr6D:22177759-22177961	1.718	0.932	6.168	4.947	TraesCS6D02G047600	NPF
Seed	chr6D:293801992-293803489	0.464	2.56	0.552	1.222	TraesCS6D02G208200	AMT
Seed	chr6D:350203827-350204983	0.496	2.427	0.688	1.437	TraesCS6D02G247100	NPF
Seed	chr6D:347996337-347997343	0.135	0.748	0.313	0.503	TraesCS6D02G245700	APC
Seed	chr6D:368114944-368116014	1.255	0.528	1.431	1.844	TraesCS6D02G260500	NPF
Seed	chr6D:368111604-368112142	0.589	0.032	1.758	0.41	TraesCS6D02G260500	NPF
Seed	chr6D:414624884-414625770	0.409	3.128	0.678	1.245	TraesCS6D02G306000	NIA
Seed	chr6D:453993024-453993245	0.137	0	0.204	0	TraesCS6D02G363900	APC
Seed	chr6D:453993075-453993567	0.184	0	0.58	0.343	TraesCS6D02G363900	APC
Seed	chr7A:26242758-26243235	1.234	2.367	1.637	1.007	TraesCS7A02G054100	NPF
Seed	chr7A:420842310-420843534	0.358	1.356	0.454	0.498	TraesCS7A02G301700	NPF
Seed	chr7A:538948701-538948901	0.377	1.54	0.525	0.389	TraesCS7A02G365100	NPF
Seed	chr7A:538952708-538953924	0.186	0.943	0.407	0.619	TraesCS7A02G365100	NPF
Seed	chr7A:556479590-556479949	0.336	0.905	0.418	0.723	TraesCS7A02G381800	NPF
Seed	chr7A:603963913-603964661	0.343	1.692	0.421	0.902	TraesCS7A02G413300	NPF
Seed	chr7A:621908933-621909096	2.314	0	3.131	0.478	TraesCS7A02G428500	NRT2
Seed	chr7A:657376793-657377687	0.473	1.722	0.453	1.089	TraesCS7A02G461200	NPF
Seed	chr7A:709808829-709809444	0.761	0	3.93	1.562	TraesCS7A02G531000	NPF
Seed	chr7A:709811010-709812002	0.867	0.052	6.674	2.263	TraesCS7A02G531000	NPF
Seed	chr7A:709813170-709813743	0.974	0.328	6.812	2.922	TraesCS7A02G531000	NPF
Seed	chr7B:116046756-116048061	0.289	1.154	0.38	0.676	TraesCS7B02G101800	NPF
Seed	chr7B:369411253-369411724	0.16	0.726	0.159	0.138	TraesCS7B02G201900	NPF
Seed	chr7B:369415699-369416285	0.335	1.693	0.436	0.62	TraesCS7B02G201900	NPF
Seed	chr7B:483232293-483233367	0.098	0.573	0.14	0.278	TraesCS7B02G262200	NPF
Seed	chr7B:517920595-517921177	0.13	0.294	0.077	0.134	TraesCS7B02G283800	NPF
Seed	chr7B:517920609-517920932	0	0	0	0	TraesCS7B02G283800	NPF
Seed	chr7B:558367480-558367757	0.218	1.482	0.921	1.265	TraesCS7B02G312600	NPF
Seed	chr7B:558368725-558369336	0.074	0.42	0.172	0.595	TraesCS7B02G312600	NPF
Seed	chr7B:624468927-624470074	0.197	0.925	0.353	0.532	TraesCS7B02G362700	NPF
Seed	chr7D:74417397-74418352	0.774	3.547	1.163	2.066	TraesCS7D02G119800	NPF
Seed	chr7D:74446678-74447412	0.391	3.1	0.92	1.644	TraesCS7D02G119900	NPF
Seed	chr7D:153985105-153985461	0.085	0.721	0.295	0.693	TraesCS7D02G197600	NPF
Seed	chr7D:374565149-374565930	0.116	1.008	0.192	0.15	TraesCS7D02G297000	NPF
Seed	chr7D:374570685-374571208	0.173	1.57	0.086	0.496	TraesCS7D02G297000	NPF
Seed	chr7D:374571770-374572216	0.44	2.225	0.303	0.64	TraesCS7D02G297000	NPF
Seed	chr7D:374572867-374573242	0.282	2.144	0.32	0.519	TraesCS7D02G297000	NPF
Seed	chr7D:460655571-460656094	0.289	0.556	0.287	0.794	TraesCS7D02G357300	NPF
Seed	chr7D:460661854-460662644	0.172	0.541	0.057	0.493	TraesCS7D02G357300	NPF
Seed	chr7D:489676705-489677427	0.188	0.853	0.312	0.665	TraesCS7D02G378300	NPF
Seed	chr7D:523278370-523278620	0.241	0.411	0.12	0.623	TraesCS7D02G406200	NPF
Seed	chr7D:617077770-617079153	1.811	0.161	1.118	0.572	TraesCS7D02G518900	NPF
Seed	chr7D:617083397-617083697	1.107	1.597	0.55	0.303	TraesCS7D02G518900	NPF
Seed	chr7D:617079380-617079541	1.781	0.319	1.026	1.37	TraesCS7D02G518900	NPF
