# Supplementary material for: Epigenetic modifications regulate cultivar-specific root development and metabolic adaptation to nitrogen availability in wheat
Source: Research Square preprint supplement (doi:10.21203/rs.3.rs-2801336/v1), 2023-04-20
Supplement: Supplementary file 4 [file 9f53317200be42bb9dfc0ae1.xlsx]

## Sheet: Sheet1
ERFs in QTL
Gene ID	Arabidopsis homologous	Name	QTLs
TraesCS6B02G237700	AT1G12980	ESR1	Rdw(Root dry weight)
TraesCS6B02G210300	AT1G15360	SHN1	Rdw(Root dry weight)
TraesCS7B02G277800	AT1G15360	SHN1	MRL(Maximum Root Length)/Nup(N uptake)
TraesCS6B02G237700	AT1G24590	DRNL	Rdw(Root dry weight)
TraesCS6B02G199800	AT1G50640	ERF3	Rdw(Root dry weight)
TraesCS6B02G199800	AT3G20310	ERF7	Rdw(Root dry weight)
TraesCS6B02G210300	AT5G11190	SHN2	Rdw(Root dry weight)
TraesCS7B02G277800	AT5G11190	SHN2	MRL(Maximum Root Length)/Nup(N uptake)
TraesCS6B02G210300	AT5G25390	SHN3	Rdw(Root dry weight)
TraesCS7B02G277800	AT5G25390	SHN3	MRL(Maximum Root Length)/Nup(N uptake)
